# Supplementary material for: Comparative efficacy and safety of vaccines to prevent seasonal influenza: A systematic review and network meta-analysis
Source: PubMed Central journal article supplement (PMC8961170; doi:10.1016/j.eclinm.2022.101331), 2022-03-25
Supplement: mmc1.pdf [file mmc1.pdf]

# Comparative efficacy and safety of vaccines to prevent seasonal influenza: a systematic review and network meta-analysis

Silvia Minozzi, Theodore Lytras, Silvia Gianola, Marien Gonzalez-Lorenzo, Greta Castellini, Cristina Galli, Danilo Cereda, Stefanos Bonovas, Elena Pariani, Lorenzo Moja

## Supplementary Appendix

### Contents

|                                                                                                                                                          |     |
|----------------------------------------------------------------------------------------------------------------------------------------------------------|-----|
| Search strategy.....                                                                                                                                     | 3   |
| Inclusion criteria details.....                                                                                                                          | 5   |
| Box 1. Summary of the different types of seasonal influenza vaccines available .....                                                                     | 6   |
| Nodes in the network.....                                                                                                                                | 7   |
| References of excluded studies.....                                                                                                                      | 8   |
| References of included studies .....                                                                                                                     | 17  |
| Characteristics of included studies.....                                                                                                                 | 27  |
| Cochrane risk of bias results across studies.....                                                                                                        | 69  |
| Cochrane risk of bias in individual studies.....                                                                                                         | 70  |
| Pairwise meta-analyses.....                                                                                                                              | 77  |
| Adults and the elderly: Inconsistency in networks of laboratory- confirmed influenza and any systemic adverse event outcomes.....                        | 87  |
| All children: Inconsistency in networks of laboratory- confirmed influenza and any systemic adverse event outcomes                                       | 94  |
| Adults and the elderly: Forest plots of laboratory- confirmed influenza, comparison with placebo/no vaccine and with 3-IIV.....                          | 95  |
| The elderly (≥61 years): Network geometry of laboratory -confirmed influenza.....                                                                        | 96  |
| The elderly (≥61 years): Forest plots of laboratory- confirmed influenza, comparison with placebo-no vaccine and with 3-IIV .....                        | 96  |
| The elderly (≥61 years): Netleague analysis of laboratory- confirmed influenza.....                                                                      | 97  |
| Immunocompromised/cancer patients: Network geometry of laboratory -confirmed influenza .....                                                             | 98  |
| Immunocompromised/cancer patients: Forest plots of laboratory- confirmed influenza, comparison with placebo-no vaccine and with 3-IIV .....              | 98  |
| Immunocompromised/cancer patients: Netleague analysis of laboratory- confirmed influenza .....                                                           | 99  |
| All children: Forest plots of laboratory confirmed influenza, comparison with placebo/no vaccine and with 3-IIV.....                                     | 100 |
| Children, aged ≤ 5 years: Network geometry of laboratory confirmed influenza.....                                                                        | 101 |
| Children, aged ≤ 5 years: Forest plots of laboratory confirmed influenza, comparison with placebo/no vaccine and with 3-IIV .....                        | 101 |
| Children, aged ≤ 5 years: Netleague analysis of laboratory confirmed influenza.....                                                                      | 102 |
| Children with pre-existing respiratory diseases: Network geometry of laboratory- confirmed influenza .....                                               | 103 |
| Children with pre-existing respiratory diseases: Forest plots of laboratory confirmed influenza, comparison with placebo-no vaccine and with 3-IIV ..... | 103 |
| Children with pre-existing respiratory diseases: Netleague analysis of laboratory- confirmed influenza .....                                             | 104 |
| Adults and the elderly: Network geometry of hospitalization rate .....                                                                                   | 105 |
| Adults and the elderly: Forest plots of hospitalization rate, comparison with placebo-no vaccine and with 3-IIV.....                                     | 105 |
| Adults and the elderly: Netleague analysis of hospitalization rate .....                                                                                 | 106 |
| All children: Network geometry of hospitalization rate .....                                                                                             | 107 |
| All children: Forest plots of hospitalization rate, comparison with placebo/no vaccine and with 3-IIV .....                                              | 107 |
| All children: Netleague analysis of hospitalization rate.....                                                                                            | 108 |
| Adults and the elderly: Network geometry of mortality of any cause .....                                                                                 | 109 |
| Adults and the elderly: Forest plots of mortality of any cause, comparison with placebo/no vaccine and with 3-IIV ...                                    | 110 |
| Adults and the elderly: Netleague analysis of mortality of any cause .....                                                                               | 111 |
| All children: Network geometry of mortality of any cause .....                                                                                           | 112 |
| All children: Forest plots of mortality of any cause, comparison with placebo/no vaccine and with 3-IIV .....                                            | 112 |
| All children: Netleague analysis of mortality of any cause .....                                                                                         | 113 |
| Adults and the elderly: Network geometry of Influenza like Illness (ILI) .....                                                                           | 114 |

|                                                                                                                                                                     |     |
|---------------------------------------------------------------------------------------------------------------------------------------------------------------------|-----|
| Adults and the elderly: Forest plot of ILI, comparison with placebo/no vaccine and with 3-IIV .....                                                                 | 114 |
| Adults and the elderly: Netleague analysis of ILI.....                                                                                                              | 115 |
| All children: Network geometry of ILI.....                                                                                                                          | 116 |
| All children: Forest plots of ILI. Comparison with placebo/no vaccine and with 3-IIV .....                                                                          | 116 |
| All children: Netleague analysis of ILI.....                                                                                                                        | 117 |
| All children: Network geometry of acute otitis media.....                                                                                                           | 118 |
| All children: Forest plot of acute otitis media, comparison with placebo/no vaccine and with 3-IIV .....                                                            | 118 |
| All children: Netleague analysis of acute otitis media.....                                                                                                         | 119 |
| Pregnancy outcomes: 3-IIV vs placebo/no vaccine, pairwise meta-analyses .....                                                                                       | 120 |
| Adults and the elderly: Network geometry of any systemic adverse event .....                                                                                        | 121 |
| Adults and the elderly: Forest plots of any systemic adverse event, comparison with placebo/no vaccine and with 3-IIV .....                                         | 122 |
| Adults and the elderly: Netleague analysis of any systemic adverse event .....                                                                                      | 123 |
| The elderly, $\geq 61$ years: Network geometry of any systemic adverse event .....                                                                                  | 124 |
| The elderly, $\geq 61$ years: Forest plot of any systemic adverse event, comparison with placebo/no vaccine and with 3-IIV .....                                    | 125 |
| The elderly, $\geq 61$ years: Netleague analysis of any systemic adverse event.....                                                                                 | 126 |
| Adult and the elderly, immunocompromised-cancer participants: Network geometry of any systemic adverse event..                                                      | 127 |
| Adult and the elderly, immunocompromised-cancer participants: Forest plots of any systemic adverse event, comparison with placebo/no vaccine and with 3-IIV .....   | 128 |
| Adult and the elderly, immunocompromised-cancer participants: Netleague analysis of any systemic adverse event..                                                    | 129 |
| All children: Network geometry of any systemic adverse event .....                                                                                                  | 130 |
| All children: Forest plots of any systemic adverse event, comparison with placebo/no vaccine and with 3-IIV .....                                                   | 131 |
| All children: Netleague analysis of any systemic adverse event .....                                                                                                | 132 |
| Children, aged $\leq 5$ years: Network geometry of any systemic adverse event.....                                                                                  | 133 |
| Children, aged $\leq 5$ years: Forest plots of any systemic adverse event, comparison with placebo/no vaccine and with 3-IIV.....                                   | 134 |
| Children, aged $\leq 5$ years: Netleague analysis of any systemic adverse event.....                                                                                | 135 |
| Adults and the elderly: Network geometry of any local adverse event.....                                                                                            | 136 |
| Adults and the elderly: Forest plots of any local adverse event, comparison with placebo/no vaccine and with 3-IIV .                                                | 137 |
| Adults and the elderly: Netleague analysis of any local adverse event.....                                                                                          | 138 |
| All children: Network geometry of any local adverse event.....                                                                                                      | 139 |
| All children: Forest plots of any local adverse event, comparison with placebo/no vaccine and with 3-IIV .....                                                      | 140 |
| All children: Netleague analysis of any local adverse event.....                                                                                                    | 141 |
| Children with pre-existing respiratory diseases: Network geometry of exacerbation chronic respiratory disease .....                                                 | 142 |
| Children with pre-existing respiratory diseases: Forest plots of exacerbation chronic respiratory disease, comparison with placebo-no vaccine and with 3-IIV* ..... | 142 |
| Children with pre-existing respiratory diseases: Netleague analysis of exacerbation chronic respiratory disease .....                                               | 143 |
| SUCRA Adults and the elderly.....                                                                                                                                   | 144 |
| SUCRA probability any Children.....                                                                                                                                 | 144 |
| Analyses of outcomes and subgroups not performed because of paucity of data .....                                                                                   | 145 |

## Search strategy

### MEDLINE (PUBMED)

#1 "Influenza, Human"[MeSH]  
#2 "Influenzavirus A"[MeSH]  
#3 "Influenzavirus B"[MeSH]  
#4 influenza\*[Text Word] OR flu[Text Word]  
#5 #1 OR #2 OR #3 OR #4  
#6 "Vaccines"[MeSH]  
#7 "Immunization"[MeSH]  
#8 (vaccin\*[Text Word] OR immuni\*[Text Word] OR inocula\*[Text Word])  
#9 #6 OR #7 OR #8  
#10 #5 AND #9  
#11 "Influenza Vaccines"[MeSH]  
#12 #10 OR #11  
#13 "Randomized Controlled Trial" [Publication Type]  
#14 "Controlled Clinical Trial" [Publication Type]  
#15 randomized[Title/Abstract]  
#16 placebo[Title/Abstract]  
#17 "drug therapy" [Subheading]  
#18 randomly[Title/Abstract]  
#19 trial[Title/Abstract]  
#20 groups[Title/Abstract]  
#21 #13 OR #14 OR #15 OR #16 OR #17 OR #18 OR #19 OR #20  
#22 ("Animals"[MeSH]) NOT "Humans"[MeSH]  
#23 #21 NOT #22  
#24 #12 AND #23

### EMBASE

#1 'influenza vaccine'/de  
#2 'influenza'/exp  
#3 'influenza virus a'/exp OR 'influenza virus b'/exp  
#4 flu:ab,ti OR influenza\*:ab,ti  
#5 #2 OR #3 OR #4  
#6 'vaccine'/de OR 'acellular vaccine'/de OR 'dna vaccine'/de OR 'inactivated vaccine'/de OR 'live vaccine'/de OR  
'subunit vaccine'/  
de OR 'virus vaccine'/de OR 'virosome vaccine'/de OR 'recombinant vaccine'/de  
#7 'immunization'/de OR 'vaccination'/de OR 'active immunization'/de OR 'immunoprophylaxis'/de OR 'mass  
immunization'/de  
#8 vaccin\*:ab,ti OR immuni\*:ab,ti OR inocul\*:ab,ti  
#9 #6 OR #7 OR #8  
#10 #5 AND #9  
#11 #1 OR #10  
#12 'randomized controlled trial'/exp OR 'single blind procedure'/exp OR 'double blind procedure'/exp  
#13 random\*:ab,ti OR placebo\*:ab,ti OR factorial\*:ab,ti OR assign\*:ab,ti OR allocat\*:ab,ti OR volunteer\*:ab,ti OR  
(singl\* OR doubl\*) NEAR/3 (blind\* OR mask\*):ab,ti  
#14 #12 OR #13  
#15 #11 AND #14  
[1-1-2017]/sd NOT [14-2-2018]/sd AND [embase]/lim

### Cochrane central (Trials)

#1 MeSH descriptor: [Influenza, Human] explode all trees  
#2 MeSH descriptor: [Influenzavirus A] explode all trees  
#3 MeSH descriptor: [Influenzavirus B] explode all trees  
#4 influenza\* or flu  
#5 #1 or #2 or #3 or #4  
#6 MeSH descriptor: [Vaccines] explode all trees  
#7 MeSH descriptor: [Immunization] explode all trees  
#8 vaccin\* or immuni\* or inocula\*  
#9 #6 or #7 or #8  
#10 #5 and #9  
#11 MeSH descriptor: [Influenza Vaccines] explode all trees

- #12 #10 or #11
- #13 MeSH descriptor: [Randomized Controlled Trial] explode all trees
- #14 MeSH descriptor: [Controlled Clinical Trial] explode all trees
- #15 randomized
- #16 placebo
- #17 MeSH descriptor: [Drug Therapy] explode all trees
- #18 randomly
- #19 trial
- #20 groups
- #21 #13 or #14 or #15 or #16 or #17 or #18 or #19 or #20
- #22 #12 and #21

### **Inclusion criteria details**

We included only vaccines and doses licensed by regulatory authorities, namely

-Standard dose Inactivated vaccines, intramuscular: adults and elderly: virion, sub unit or split trivalent or quadrivalent vaccine containing 15 µg di HA per strains (TIV: 45 µg total, QIV: 60 µg total); children 6-36 months: 7,5 µg/strain; if never vaccinated before, two doses one month apart

-High- dose inactivated vaccines: 60 µg per strain; TIV: 180 µg; QIV 240 µg total. Vaccines with doses between 15 and 60 µg per strains were considered as standard dose (including vaccines prepared with the DNA recombinant technique)

-Adjuvanted vaccines: we included virosomal or liposome adjuvanted (one node) and MF59 or AS03 with or without IL2 (another node), both TIV or QIV. Vaccines adjuvanted using other methods (e.g TLR ligand or polyoxidonium) were excluded

-Recombinant trivalent inactivated (rHA): we included any dose

-Intradermal inactivated vaccines: we included only doses of 9 or 15 µg per strains; also QIV intradermal (doses of 9 or 15 µg per strains) were included in a separate node

-Trivalent live attenuated nasal spray

-Quadrivalent live attenuated nasal spray

## **Box 1. Summary of the different types of seasonal influenza vaccines available**

### Inactivated influenza vaccines (IIVs)

Consist of viruses killed through the use of different chemical compounds in production processes based on different technologies. IIVs are injectable and include: i) whole virion IIVs, containing whole viral particles; ii) split IIVs, in which the virus is inactivated with disrupting agents, yielding surface and internal antigens; iii) subunit IIVs, containing only surface antigens – hemagglutinin (HA) and neuraminidase (NA) - purified from other viral components. Among these, split and subunit IIVs are more commonly used due to improved tolerability. For split and subunit IIVs, the standard antigen dose corresponds to 15 µg of HA per viral strain. To enhance the vaccine-induced immune response, two types of vaccines were specifically developed: formulations that include the use of adjuvants (such as AS03 or MF59, oil-in-water emulsions) or virosomes/liposomes (vesicles with phospholipid membranes incorporating viral antigens), and high-dose (HD) influenza vaccines containing an amount of antigen four times higher than the standard dose (60 µg of HA per strain).

Most IIVs are administered intramuscularly (IM); intradermal (ID) preparations that enhance the immune response thanks to the simultaneous stimulation of innate and adaptive immunity are also available.

IIVs can be produced in eggs or in cell-cultures. Egg-based IIVs have been licensed in the US and Europe for use in adults and children six months and older, with the MF59-adjuvanted or high dose vaccines licensed for use in the elderly. Cell-based IIVs for individuals who are allergic to eggs are licensed in the US, and are under evaluation in Europe.

### Live-attenuated influenza vaccines (LAIVs)

Containing active whole viral particles; those currently available are made of temperature-sensitive viruses that can survive and replicate only at the low temperature of the upper respiratory tract (cold-adapted); they are administered intranasally (IN). LAIVs are licensed for persons aged 2 to 59 years old and are recommended for healthy, non-pregnant individuals who do not have chronic medical conditions, due to the relative lack of data in the other populations.

### Recombinant influenza vaccines (RIVs)

Recombinant technologies have the added benefit of substantially reducing production times compared with egg-based and cell-based technologies, as production can begin once a virus genome has been sequenced rather than starting with a live virus. A recombinant-HA expressed in insect cells using baculovirus vectors was licensed for use in adults aged 18–49 years old in the US.

## Nodes in the network

| Label               | Vaccine                                                                  |
|---------------------|--------------------------------------------------------------------------|
| placebo             | placebo/no vaccine                                                       |
| 3-IIV               | trivalent inactivated intramuscular                                      |
| 3-IIV HD            | trivalent inactivated high dose intramuscular                            |
| 3-IIV ID            | trivalent inactivated intradermal                                        |
| 3-IIV MF59/AS03-adj | trivalent inactivated adjuvanted with MF59/AS03 intramuscular            |
| 3-IIV vir/lip-adj   | trivalent inactivated adjuvanted with Virosome/liposome intramuscular    |
| 3-RIV               | trivalent recombinant intramuscular                                      |
| 4-IIV               | quadrivalent inactivated intramuscular                                   |
| 4-IIV HD            | quadrivalent inactivated high dose intramuscular                         |
| 4-IIV ID            | quadrivalent inactivated intradermal                                     |
| 4-IIV MF59/AS03-adj | quadrivalent inactivated adjuvanted with MF59/AS03 intramuscular         |
| 4-IIV vir/lip-adj   | quadrivalent inactivated adjuvanted with virosome/liposome intramuscular |
| 4-RIV               | quadrivalent recombinant intramuscular                                   |
| 3-LAIV              | trivalent live attenuated intranasal                                     |
| 4-LAIV              | quadrivalent live attenuated intranasal                                  |

## References of excluded studies

| References                                                                                                                                                                                                                                                                                                                                                                                                                                                                  | Reasons for exclusion                          |
|-----------------------------------------------------------------------------------------------------------------------------------------------------------------------------------------------------------------------------------------------------------------------------------------------------------------------------------------------------------------------------------------------------------------------------------------------------------------------------|------------------------------------------------|
| 1. Agarkhedkar S, Chhatwal J, Kompithra RZ, Lalwani SK, Narayan A, Muninarayanaswam V, et al. Immunogenicity and safety of an intramuscular split-virion quadrivalent inactivated influenza vaccine in individuals aged $\geq 6$ months in India. <i>Human vaccines &amp; immunotherapeutics</i> . 2019;15(4):973-7.                                                                                                                                                        | No relevant outcome                            |
| 2. Airey J, Albano FR, Sawlwin DC, et al. Immunogenicity and safety of a quadrivalent inactivated influenza virus vaccine compared with a comparator quadrivalent inactivated influenza vaccine in a pediatric population: a phase 3, randomized noninferiority study. <i>Vaccine</i> . 2017;35(20):2745-2752.                                                                                                                                                              | No relevant comparator                         |
| 3. Ambati A, Boas LS, Ljungman P, et al. Evaluation of pretransplant influenza vaccination in hematopoietic SCT: a randomized prospective study. <i>Bone marrow transplantation</i> . Jun 2015;50(6):858-864.                                                                                                                                                                                                                                                               | No relevant outcome                            |
| 4. Ansaldi F, Bacilieri S, Durando P, Sticchi L, Valle L, Montomoli E, et al. Cross-protection by MF59-adjuvanted influenza vaccine: neutralizing and haemagglutination-inhibiting antibody activity against A(H3N2) drifted influenza viruses. <i>Vaccine</i> . 2008;26(12):1525-9.                                                                                                                                                                                        | No relevant outcome                            |
| 5. Ansaldi F, Zancolli M, Durando P, Montomoli E, Sticchi L, Del Giudice G, et al. Antibody response against heterogeneous circulating influenza virus strains elicited by MF59- and non-adjuvanted vaccines during seasons with good or partial matching between vaccine strain and clinical isolates. <i>Vaccine</i> . 2010;28(25):4123-9.                                                                                                                                | No relevant outcome                            |
| 6. Arakane R, Annaka R, Takahama A, et al. Superior immunogenicity profile of the new intradermal influenza vaccine compared to the standard subcutaneous vaccine in subjects 65 years and older: a randomized controlled phase III study. <i>Vaccine</i> . 2015;33(48):6650-6658.                                                                                                                                                                                          | No relevant comparator                         |
| 7. Arakane R, Nakatani H, Fujisaki E, Takahama A, Ishida K, Yoshiike M, et al. Immunogenicity and safety of the new intradermal influenza vaccine in adults and elderly: A randomized phase 1/2 clinical trial. <i>Vaccine</i> . 2015;33(46):6340-50.                                                                                                                                                                                                                       | No vaccine of interest                         |
| 8. Baldo V, Menegon T, Bonello C, Floreani A, Trivello R. Comparison of three different influenza vaccines in institutionalised elderly. <i>Vaccine</i> . 2001;19(25-26):3472-3475.<br>Baldo V, Baldovin T, Pellegrini M, et al. Immunogenicity of three different influenza vaccines against homologous and heterologous strains in nursing home elderly residents. <i>Clinical &amp; developmental immunology</i> . 2010;2010:517198.                                     | No relevant outcome                            |
| 9. Banzhoff A, Kaniok W, Muszer A. Effectiveness of an influenza vaccine used in Poland in the 1998-1999 influenza season. <i>Immunological investigations</i> . May 2001;30(2):103-113.                                                                                                                                                                                                                                                                                    | Secondary analysis of already included studies |
| 10. Belshe RB, Gruber WC, Mendelman PM, et al. Correlates of immune protection induced by live, attenuated, cold-adapted, trivalent, intranasal influenza virus vaccine. <i>Journal of infectious diseases</i> . 2000;181(3):1133-1137.                                                                                                                                                                                                                                     | No vaccine of interest                         |
| 11. Belshe RB, Gruber WC. Safety, efficacy and effectiveness of cold-adapted, live, attenuated, trivalent, intranasal influenza vaccine in adults and children. <i>Philosophical transactions of the royal society of london. Series B, biological sciences</i> . 2001;356(1416):1947-1951.                                                                                                                                                                                 | Secondary analysis of already included studies |
| 12. Belshe RB, Newman FK, Cannon J, et al. Serum antibody responses after intradermal vaccination against influenza. <i>The New England journal of medicine</i> . Nov 25 2004;351(22):2286-2294.                                                                                                                                                                                                                                                                            | Secondary analysis of already included studies |
| 13. Bernstein DI, Guptill J, Naficy A, Nachbagauer R, Berlanda-Scorza F, Feser J, et al. Immunogenicity of chimeric haemagglutinin-based, universal influenza virus vaccine candidates: interim results of a randomised, placebo-controlled, phase 1 clinical trial. <i>The Lancet Infectious diseases</i> . 2020;20(1):80-91.                                                                                                                                              | No vaccine of interest                         |
| 14. Boyce TG, Hsu HH, Sannella EC, et al. Safety and immunogenicity of adjuvanted and unadjuvanted subunit influenza vaccines administered intranasally to healthy adults. <i>Vaccine</i> . Sep 15 2000;19(2-3):217-226.                                                                                                                                                                                                                                                    | No vaccine of interest                         |
| 15. Branagan A, Duffy E, Foster C, et al. Two dose series of high-dose influenza vaccine is associated with longer duration of serologic immunity in patients with plasma cell disorders. <i>Blood</i> . 2017;130.                                                                                                                                                                                                                                                          | No relevant outcome                            |
| 16. Burgess T, Richard S, Collins L, Colombo R, Ganesan A, Geaney C, et al. Pragmatic assessment of influenza vaccine effectiveness in the DOD (PAIVED): Influenza-like-illness rates in year 1. <i>Open forum infectious diseases</i> . 2019;6:S990.<br>Burgess T, Richard S, Collins L, Colombo R, Ganesan A, Geaney C, et al. Pragmatic assessment of influenza vaccine effectiveness in the DOD (PAIVED): Methods. <i>Open forum infectious diseases</i> . 2019;6:S969. | No parallel RCT                                |
| 17. Caldera F, Saha S, Wald A, Grimes I, Hillman L, Zhang Y, et al. Randomized trial evaluating the immunogenicity of high dose vs. standard dose influenza vaccine in IBD patients on anti-tnf monotherapy. <i>Gastroenterology</i> . 2018;154(6):S-69-.                                                                                                                                                                                                                   | Secondary analysis of already included studies |
| 18. Camilloni B, Basileo M, Di Martino A, Donatelli I, Iorio AM. Antibody responses to intradermal or intramuscular MF59-adjuvanted influenza vaccines as evaluated in elderly institutionalized volunteers during a season of partial mismatching between vaccine and circulating A(H3N2) strains. <i>Immunity &amp; ageing : I &amp; A</i> . 2014;11:10.                                                                                                                  | No relevant outcome                            |



|     |                                                                                                                                                                                                                                                                                                                                                                                               |                                                |
|-----|-----------------------------------------------------------------------------------------------------------------------------------------------------------------------------------------------------------------------------------------------------------------------------------------------------------------------------------------------------------------------------------------------|------------------------------------------------|
| 19. | Castro M, Dozor A, Fish J, et al. The safety of inactivated influenza vaccine in adults and children with asthma. <i>New England Journal of Medicine</i> . 2001;345(21):1529-1536.                                                                                                                                                                                                            | No parallel RCT                                |
| 20. | Celik A, Orselik O. Effects of influenza vaccination in patients with heart failure. <i>Herz</i> . 2017;42(3):325-326.                                                                                                                                                                                                                                                                        | No parallel RCT                                |
| 21. | Chuaychoo B, Kositanont U, Rittayamai N, et al. The immunogenicity of the intradermal injection of seasonal trivalent influenza vaccine containing influenza A(H1N1) pdm09 in COPD patients soon after a pandemic. <i>Human vaccines &amp; immunotherapeutics</i> . Jul 2 2016;12(7):1728-1737.                                                                                               | No relevant comparator                         |
| 22. | Chuaychoo B, Wongsurakiat P, Nana A, Kositanont U, Maranetra KN. The immunogenicity of intradermal influenza vaccination in COPD patients. <i>Vaccine</i> . 2010;28(24):4045-51.                                                                                                                                                                                                              | No vaccine of interest                         |
| 23. | Chumakov MP, Beregovskii NA, Linev MB, et al. [Use of highly purified subvirion trivalent flue vaccine ("Grippovak") in groups with a high risk of complications]. <i>Zhurnal mikrobiologii, epidemiologii, i immunobiologii</i> . Mar 1992(3):55-57.                                                                                                                                         | No parallel RCT                                |
| 24. | Ciszewski A, Billinska ZT, Brydak LB. Influenza vaccination in secondary prevention from coronary ischemic events in Coronary Artery Disease (FLUCAD). <i>ACC Cardiosource Review Journal</i> . 2008;17(4):34.                                                                                                                                                                                | No relevant outcome                            |
| 25. | Claeys C, Drame M, Garcia-Sicilia J, Zaman K, Carmona A, Tran PM, et al. Assessment of an optimized manufacturing process for inactivated quadrivalent influenza vaccine: a phase III, randomized, double-blind, safety and immunogenicity study in children and adults. <i>BMC infectious diseases</i> . 2018;18(1).                                                                         | No relevant comparator                         |
| 26. | Clover RD, Crawford S, Glezen WP, Taber LH, Matson CC, Couch RB. Comparison of heterotypic protection against influenza A/Taiwan/86 (H1N1) by attenuated and inactivated vaccines to A/Chile/83-like viruses. <i>The Journal of infectious diseases</i> . Feb 1991;163(2):300-304.                                                                                                            | No parallel RCT                                |
| 27. | Colombo R, Richard S, Schofield C, Collins L, Ganesan A, Geaney C, et al. Pragmatic assessment of influenza vaccine effectiveness in the DOD (PAIVED): immunogenicity sub-study. <i>Open forum infectious diseases</i> . 2019;6:S971-S2.                                                                                                                                                      | No parallel RCT                                |
| 28. | Conne P, Gauthey L, Vernet P, et al. Immunogenicity of trivalent subunit versus virosome-formulated influenza vaccines in geriatric patients. <i>Vaccine</i> . 1997;15(15):1675-1679.                                                                                                                                                                                                         | No relevant outcome                            |
| 29. | Cook Q, Burks AW. Safety and immunogenicity of a recombinant influenza vaccine: a randomized trial. <i>Pediatrics</i> . 2018;142:S273-S4.                                                                                                                                                                                                                                                     | Secondary analysis of already included studies |
| 30. | Cools HJM, Gussekloo J, Remmerswaal JEM, Remarque EJ, Kroes ACM. Benefits of increasing the dose of influenza vaccine in residents of long-term care facilities: A randomized placebo-controlled trial. <i>Journal of Medical Virology</i> . 2009;81(5):908-914.                                                                                                                              | No relevant outcome                            |
| 31. | Cooper C, Thorne A, Klein M, Conway B, Boivin G, Haase D, et al. Immunogenicity is not improved by increased antigen dose or booster dosing of seasonal influenza vaccine in a randomized trial of HIV infected adults. <i>PloS one</i> . 2011;6(3):e17758.                                                                                                                                   | No vaccine of interest                         |
| 32. | Cordero E, Roca-Oporto C, Bulnes-Ramos A, Aydillo T, Gavaldà J, Moreno A, et al. Two Doses of Inactivated Influenza Vaccine Improve Immune Response in Solid Organ Transplant Recipients: Results of TRANSGRIPE 1-2, a Randomized Controlled Clinical Trial. <i>Clinical infectious diseases : an official publication of the Infectious Diseases Society of America</i> . 2017;64(7):829-38. | No vaccine of interest                         |
| 33. | Danier J, Rivera L, Claeys C, Dbaibo G, Jain VK, Kosalaraksa P, et al. Clinical Presentation of Influenza in Children 6 to 35 Months of Age: Findings from a Randomized Clinical Trial of Inactivated Quadrivalent Influenza Vaccine. <i>Pediatric Infectious Disease Journal</i> . 2019;38(8):866-72.                                                                                        | Secondary analysis of already included studies |
| 34. | Dbaibo G, Amanullah A, Claeys C, Izu A, Jain VK, Kosalaraksa P, et al. Quadrivalent Influenza Vaccine Prevents Illness and Reduces Healthcare Utilization Across Diverse Geographic Regions During Five Influenza Seasons: A Randomized Clinical Trial. <i>The Pediatric infectious disease journal</i> . 2020;39(1):e1-e10.                                                                  | Secondary analysis of already included studies |
| 35. | de B, Zanasi A, Ragusa S, Gluck R, Herzog C. An open-label comparison of the immunogenicity and tolerability of intranasal and intramuscular formulations of virosomal influenza vaccine in healthy adults. <i>Clinical therapeutics</i> . Jan 2002;24(1):100-111.                                                                                                                            | No relevant comparator                         |
| 36. | Della Cioppa G, Nicolay U, Lindert K, et al. A dose-ranging study in older adults to compare the safety and immunogenicity profiles of MF59(R)-adjuvanted and non-adjuvanted seasonal influenza vaccines following intradermal and intramuscular administration. <i>Human vaccines &amp; immunotherapeutics</i> . 2014;10(6):1701-1710.                                                       | No relevant comparator                         |
| 37. | Diallo A, Diop OM, Diop D, Niang MN, Sugimoto JD, Ortiz JR, et al. Effectiveness of Seasonal Influenza Vaccination in Children in Senegal During a Year of Vaccine Mismatch: A Cluster-randomized Trial. <i>Clinical infectious diseases : an official publication of the Infectious Diseases Society of America</i> . 2019;69(10):1780-8.                                                    | No parallel RCT                                |
| 38. | Donatelli I, Zannolli R, Fuiano L, Biasio LR. Influenza vaccine in immunogenically naive healthy infants. <i>European journal of pediatrics</i> . Nov 1998;157(11):949-950.                                                                                                                                                                                                                   | No relevant comparator                         |

|     |                                                                                                                                                                                                                                                                                                                                                                                          |                         |
|-----|------------------------------------------------------------------------------------------------------------------------------------------------------------------------------------------------------------------------------------------------------------------------------------------------------------------------------------------------------------------------------------------|-------------------------|
| 39. | Durrer P, Gluck U, Spyr C, et al. Mucosal antibody response induced with a nasal virosome-based influenza vaccine. <i>Vaccine</i> . Oct 1 2003;21(27-30):4328-4334.                                                                                                                                                                                                                      | No vaccine of interest  |
| 40. | Edwards KM, Dupont WD, Westrich MK, Plummer Jr WD, Palmer PS, Wright PF. A randomized controlled trial of cold-adapted and inactivated vaccines for the prevention of influenza A disease. <i>Journal of Infectious Diseases</i> . 1994;169(1):68-76.                                                                                                                                    | No vaccine of interest  |
| 41. | El'shina GA, Masalin Iu M, Shervali VI, et al. [The trivalent polymer-subunit influenza vaccine Grippol studied in a controlled epidemiological trial (1)]. <i>Voenno-meditsinskii zhurnal</i> . Aug 1996;317(8):57-60.                                                                                                                                                                  | No vaccine of interest  |
| 42. | Esposito S, Fling J, Chokeyphaibulkit K, de Bruijn M, Obery J, Zhang B, et al. Immunogenicity and Safety of an MF59-adjuvanted Quadrivalent Seasonal Influenza Vaccine in Young Children at High Risk of Influenza-associated Complications: A Phase III, Randomized, Observer-blind, Multicenter Clinical Trial. <i>The Pediatric infectious disease journal</i> . 2020;39(8):e185-e91. | Not relevant comparator |
| 43. | Esposito S, Marchisio P, Ansaldi F, et al. A randomized clinical trial assessing immunogenicity and safety of a double dose of virosomal-adjuvanted influenza vaccine administered to unprimed children aged 6-35 months. <i>Vaccine</i> . Aug 31 2010;28(38):6137-6144.                                                                                                                 | No relevant outcome     |
| 44. | Esposito S, Marchisio P, Bosis S, et al. Clinical and economic impact of influenza vaccination on healthy children aged 2-5 years. <i>Vaccine</i> . Jan 30 2006;24(5):629-635.                                                                                                                                                                                                           | No relevant outcome     |
| 45. | Esposito S, Marchisio P, Cavagna R, et al. Effectiveness of influenza vaccination of children with recurrent respiratory tract infections in reducing respiratory-related morbidity within the households. <i>Vaccine</i> . Jul 4 2003;21(23):3162-3168.                                                                                                                                 | No relevant comparator  |
| 46. | Eun BW, Lee TJ, Lee J, Kim KH, Kim DH, Jo DS, et al. A Randomized, Double-blind, Active-controlled Phase III Trial of a Cell Culture-derived Quadrivalent Inactivated Influenza Vaccine in Healthy South Korean Children and Adolescents 6 Months to 18 Years of Age. <i>The Pediatric infectious disease journal</i> . 2019;38(9):e209-e15.                                             | No vaccine of interest  |
| 47. | Forrest BD, Pride MW, Dunning AJ, et al. Correlation of cellular immune responses with protection against culture-confirmed influenza virus in young children. <i>Clinical and vaccine immunology: CVI</i> . Jul 2008;15(7):1042-1053.                                                                                                                                                   | No relevant outcome     |
| 48. | Fritz Verhees RA, Thijs C, Ambergen T, Dinant GJ, Knottnerus JA. Influenza vaccination in the elderly: 25 years follow-up of a randomized controlled trial. No impact on long-term mortality. <i>PLoS one</i> . 2019;14(5).                                                                                                                                                              | No parallel RCT         |
| 49. | Gaughran F, Walwyn R, Lambkin-Williams R, et al. Flu: effect of vaccine in elderly care home residents: a randomized trial. <i>Journal of the American Geriatrics Society</i> . Dec 2007;55(12):1912-1920.                                                                                                                                                                               | No relevant comparator  |
| 50. | Gelinck LB, Bemt BJ, Marijt WA, et al. Intradermal influenza vaccination in immunocompromized patients is immunogenic and feasible. <i>Vaccine</i> . 2009;27(18):2469-2474.                                                                                                                                                                                                              | No relevant comparator  |
| 51. | Glesby MJ, Hoover DR, Farzadegan H, Margolick JB, Saah AJ. The effect of influenza vaccination on human immunodeficiency virus type 1 load: a randomized, double-blind, placebo-controlled study. <i>The Journal of infectious diseases</i> . Dec 1996;174(6):1332-1336.                                                                                                                 | No relevant outcome     |
| 52. | Glück R, Mischler R, Finkel B, Que JU, Scarpa B, Cryz Jr SJ. Immunogenicity of new virosome influenza vaccine in elderly people. <i>Lancet</i> . 1994;344(8916):160-163.                                                                                                                                                                                                                 | No relevant outcome     |
| 53. | Gordon DL, Sajkov D, Honda-Okubo Y, et al. Human Phase 1 trial of low-dose inactivated seasonal influenza vaccine formulated with Advax delta inulin adjuvant. <i>Vaccine</i> . Jul 19 2016;34(33):3780-3786.                                                                                                                                                                            | No vaccine of interest  |
| 54. | Gorse GJ, Campbell MJ, Otto EE, Powers DC, Chambers GW, Newman FK. Increased anti-influenza A virus cytotoxic T cell activity following vaccination of the chronically ill elderly with live attenuated or inactivated influenza virus vaccine. <i>The Journal of infectious diseases</i> . Jul 1995;172(1):1-10.                                                                        | No vaccine of interest  |
| 55. | Gorse GJ, O'Connor TZ, Young SL, et al. Efficacy trial of live, cold-adapted and inactivated influenza virus vaccines in older adults with chronic obstructive pulmonary disease: a VA cooperative study. <i>Vaccine</i> . May 16 2003;21(17-18):2133-2144.                                                                                                                              | No vaccine of interest  |
| 56. | Gorse GJ, Otto EE, Daughaday CC, et al. Influenza virus vaccination of patients with chronic lung disease. <i>Chest</i> . Nov 5 1997;112(5):1221-1233.                                                                                                                                                                                                                                   | No vaccine of interest  |
| 57. | Gravenstein S, Davidson HE, Han LF, Ogarek JA, Dahal R, Gozalo PL, et al. Feasibility of a cluster-randomized influenza vaccination trial in U.S. nursing homes: Lessons learned. <i>Human vaccines &amp; immunotherapeutics</i> . 2018;14(3):736-43.                                                                                                                                    | No parallel RCT         |
| 58. | Gravenstein S, Davidson HE, McConeghy K, Han L, Canaday D, Saade E, et al. A cluster-randomized trial of adjuvanted trivalent influenza vaccine vs. standard dose in US nursing homes. <i>Open forum infectious diseases</i> . 2018;5:S296-.                                                                                                                                             | No parallel RCT         |
| 59. | Gravenstein S, Davidson HE, Taljaard M, Ogarek J, Gozalo P, Han L, et al. Comparative effectiveness of high-dose versus standard-dose influenza vaccination on numbers of US nursing home residents admitted to hospital: a cluster-randomised trial. <i>The Lancet Respiratory medicine</i> . 2017;5(9):738-46.                                                                         | No parallel RCT         |

|     |                                                                                                                                                                                                                                                                                                                                                                                                                                                                                               |                                                |
|-----|-----------------------------------------------------------------------------------------------------------------------------------------------------------------------------------------------------------------------------------------------------------------------------------------------------------------------------------------------------------------------------------------------------------------------------------------------------------------------------------------------|------------------------------------------------|
| 60. | Grigoreva EPRA, Rudenko LG, Ramires A, Barro M, Lisovskaya KV, Klimov AI, Aleksandrova GI. Study of the Immunogenic Properties and Prophylactic Efficacy of a Live Influenza Polyvalent Vaccine in Children aged 5-14 years. <i>Voprosy Virusologii</i> 1994;39(1):26-29.                                                                                                                                                                                                                     | No relevant outcome                            |
| 61. | Grigor'eva EP, Desheva Iu A, Donina SA, et al. [The comparative characteristics of the safety, immunogenic activity and prophylactic potency of the adult and children types of live influenza vaccine in schoolchildren aged 7-14 years]. <i>Voprosy virusologii</i> . Jul-Aug 2002;47(4):24-27.                                                                                                                                                                                             | No relevant outcome                            |
| 62. | Gruber WC, Campbell PW, Thompson JM, Reed GW, Roberts B, Wright PF. Comparison of live attenuated and inactivated influenza vaccines in cystic fibrosis patients and their families: results of a 3-year study. <i>The Journal of infectious diseases</i> . Feb 1994;169(2):241-247.                                                                                                                                                                                                          | No relevant comparator                         |
| 63. | Gurfinkel EP, Fuente RL, Mendiz O, Mautner B. Influenza vaccine pilot study in acute coronary syndromes and planned percutaneous coronary interventions: the FLU Vaccination Acute Coronary Syndromes (FLUVACS) Study. <i>Circulation</i> . 2002;105(18):2143-2147.<br>Gurfinkel EP, Leon de la Fuente R, Mendiz O, Mautner B. Flu vaccination in acute coronary syndromes and planned percutaneous coronary interventions (FLUVACS) Study. <i>European heart journal</i> . 2004;25(1):25-31. | No relevant outcome                            |
| 64. | Halloran ME, Piedra PA, Longini IM, Jr., et al. Efficacy of trivalent, cold-adapted, influenza virus vaccine against influenza A (Fujian), a drift variant, during 2003-2004. <i>Vaccine</i> . May 16 2007;25(20):4038-4045.                                                                                                                                                                                                                                                                  | No parallel RCT                                |
| 65. | Halperin SA, Smith B, Nolan C, Shay J, Kralovec J. Safety and immunoenhancing effect of a Chlorella-derived dietary supplement in healthy adults undergoing influenza vaccination: randomized, double-blind, placebo-controlled trial. <i>CMAJ: Canadian Medical Association journal = journal de l'Association medicale canadienne</i> . Jul 22 2003;169(2):111-117.                                                                                                                         | No relevant comparator                         |
| 66. | Houser KV, Yamshchikov GV, Bellamy AR, May J, Enama ME, Sarwar U, et al. DNA vaccine priming for seasonal influenza vaccine in children and adolescents 6 to 17 years of age: a phase I randomized clinical trial. <i>PLoS one</i> . 2018;13(11):e0206837.                                                                                                                                                                                                                                    | No vaccine of interest                         |
| 67. | Hu Y, Chu K, Lavis N, Li X, Liang B, Liu S, et al. Immunogenicity and safety of a trivalent inactivated influenza vaccine produced in Shenzhen, China versus a comparator influenza vaccine: a phase IV randomized study. <i>Human vaccines &amp; immunotherapeutics</i> . 2019;15(5):1066-9.                                                                                                                                                                                                 | Not relevant comparator                        |
| 68. | Hung IF, Zhang AJ, To KK, Chan JF, Li C, Zhu HS, et al. Immunogenicity of intradermal trivalent influenza vaccine with topical imiquimod: a double blind randomized controlled trial. <i>Clinical infectious diseases: an official publication of the Infectious Diseases Society of America</i> . 2014;59(9):1246-55.                                                                                                                                                                        | No vaccine of interest                         |
| 69. | Iorio AM, Camilloni B, Basileo M, Guercini F, Conti S, Ferrante F, et al. Influenza vaccination in patients on long-term anticoagulant therapy. <i>Vaccine</i> . 2006;24(44-46):6624-8.                                                                                                                                                                                                                                                                                                       | No parallel RCT                                |
| 70. | Iorio AM, Francisci D, Camilloni B, et al. Antibody responses and HIV-1 viral load in HIV-1-seropositive subjects immunised with either the MF59-adjuvanted influenza vaccine or a conventional non-adjuvanted subunit vaccine during highly active antiretroviral therapy. <i>Vaccine</i> . 2003;21(25-26):3629-3637.                                                                                                                                                                        | No relevant outcome                            |
| 71. | Jain VK, Domachowske JB, Wang L, et al. Time to change dosing of inactivated quadrivalent influenza vaccine in young children: Evidence from a phase III, randomized, controlled trial. <i>Journal of the Pediatric Infectious Diseases Society</i> . 2017;6(1):9-19.                                                                                                                                                                                                                         | No relevant comparator                         |
| 72. | Jamshed S, Falsey AR, Thushara P, Walker J, Walsh EE. Randomized study comparing high-dose (HD) influenza vaccine to standard-dose (SD) influenza vaccine in patients with breast cancer age < 65 receiving chemotherapy. <i>Journal of Clinical Oncology</i> . 2017;35(15_suppl):e21695-e21695.                                                                                                                                                                                              | No relevant outcome                            |
| 73. | Jansen AG, Sanders EA, Hoes AW, van Loon AM, Hak E. Effects of influenza plus pneumococcal conjugate vaccination versus influenza vaccination alone in preventing respiratory tract infections in children: a randomized, double-blind, placebo-controlled trial. <i>The Journal of pediatrics</i> . Dec 2008;153(6):764-770.                                                                                                                                                                 | No vaccine of interest                         |
| 74. | Jianping H, Xin F, Changshun L, et al. Assessment of effectiveness of Vaxigrip. <i>Vaccine</i> . Jul 30 1999;17 Suppl 1:S57-58.                                                                                                                                                                                                                                                                                                                                                               | No parallel RCT                                |
| 75. | Jing-Xia G, Yu-Liang Z, Jin-Feng L, Shu-Zhen L, Guo-Yang L, Qi L. Safety and effectiveness assessment of 2011-2012 seasonal influenza vaccine produced in China: a randomized trial. <i>Postgraduate Medicine</i> . 2017;129(8):907-914.                                                                                                                                                                                                                                                      | No relevant comparator                         |
| 76. | Jo YM, Song JY, Hwang IS, et al. Dose sparing strategy with intradermal influenza vaccination in patients with solid cancer. <i>Journal of medical virology</i> . Apr 2009;81(4):722-727.                                                                                                                                                                                                                                                                                                     | No relevant comparator                         |
| 77. | Jo YM, Song JY, Hwang IS, Lee J, Oh SC, Kim JS, et al. Dose sparing strategy with intradermal influenza vaccination in patients with solid cancer. <i>Journal of medical virology</i> . 2009;81(4):722-7.                                                                                                                                                                                                                                                                                     | No vaccine of interest                         |
| 78. | Kang JH, Oh CE, Lee J, et al. Safety and immunogenicity of a new trivalent inactivated split-virus influenza vaccine in healthy Korean children: a randomized, double-blinded, active-controlled, phase III study. <i>Journal of Korean medical science</i> . Nov 2011;26(11):1421-1427.                                                                                                                                                                                                      | No relevant comparator                         |
| 79. | Katz J, Englund JA, Steinhoff MC, Khatri SK, Shrestha L, Kuypers J, et al. Impact of Timing of Influenza Vaccination in Pregnancy on Transplacental Antibody Transfer, Influenza Incidence, and Birth Outcomes: a Randomized Trial in Rural Nepal. <i>Clinical infectious diseases</i> . 2018;67(3):334-40.                                                                                                                                                                                   | Secondary analysis of already included studies |

|     |                                                                                                                                                                                                                                                                                                                                                                                                                                                                                                                                                                                                                                                                                                                                                                                                    |                                                |
|-----|----------------------------------------------------------------------------------------------------------------------------------------------------------------------------------------------------------------------------------------------------------------------------------------------------------------------------------------------------------------------------------------------------------------------------------------------------------------------------------------------------------------------------------------------------------------------------------------------------------------------------------------------------------------------------------------------------------------------------------------------------------------------------------------------------|------------------------------------------------|
| 80. | Keitel W, Couch R, Bond N, Adair S, Nest G, Dekker C. Pilot evaluation of influenza virus vaccine (IVV) combined with adjuvant. <i>Vaccine</i> . 1993;11(9):909-913.                                                                                                                                                                                                                                                                                                                                                                                                                                                                                                                                                                                                                               | No relevant outcome                            |
| 81. | Keitel WA, Couch RB, Quarles JM, Cate TR, Baxter B, Maassab HF. Trivalent attenuated cold-adapted influenza virus vaccine: reduced viral shedding and serum antibody responses in susceptible adults. <i>The Journal of infectious diseases</i> . Feb 1993;167(2):305-311.                                                                                                                                                                                                                                                                                                                                                                                                                                                                                                                         | No parallel RCT                                |
| 82. | Kenney RT, Frech SA, Muenz LR, Villar CP, Glenn GM. Dose sparing with intradermal injection of influenza vaccine. <i>The New England journal of medicine</i> . Nov 25 2004;351(22):2295-2301.                                                                                                                                                                                                                                                                                                                                                                                                                                                                                                                                                                                                      | No relevant comparator                         |
| 83. | Khan AS, Polezhaev F, Vasiljeva R, et al. Comparison of US inactivated split-virus and Russian live attenuated, cold-adapted trivalent influenza vaccines in Russian schoolchildren. <i>The Journal of infectious diseases</i> . Feb 1996;173(2):453-456.                                                                                                                                                                                                                                                                                                                                                                                                                                                                                                                                          | No relevant outcome                            |
| 84. | Khanlou H, Sanchez S, Babaie M, Chien C, Hamwi G, Ricaurte JC, et al. The safety and efficacy of dose-sparing intradermal administration of influenza vaccine in human immunodeficiency virus-positive patients. <i>Archives of internal medicine</i> . 2006;166(13):1417.                                                                                                                                                                                                                                                                                                                                                                                                                                                                                                                         | No relevant outcome                            |
| 85. | Kiderman A, Furst A, Stewart B, Greenbaum E, Morag A, Zakay-Rones Z. A double-blind trial of a new inactivated, trivalent, intra-nasal anti-influenza vaccine in general practice: relationship between immunogenicity and respiratory morbidity over the winter of 1997-98. <i>Journal of clinical virology: the official publication of the Pan American Society for Clinical Virology</i> . Feb 2001;20(3):155-161.                                                                                                                                                                                                                                                                                                                                                                             | No relevant outcome                            |
| 86. | Kmieciak T, Arnoux S, Kobryn A, Gorski P. Influenza vaccination in adults with asthma: safety of an inactivated trivalent influenza vaccine. <i>The Journal of asthma: official journal of the Association for the Care of Asthma</i> . Dec 2007;44(10):817-822.                                                                                                                                                                                                                                                                                                                                                                                                                                                                                                                                   | No parallel RCT                                |
| 87. | Kostinov MP, Cherdantsev AP, Akhmatova NK, Praulova DA, Kostinova AM, Akhmatova EA, et al. Immunogenicity and safety of subunit influenza vaccines in pregnant women. <i>ERJ open research</i> . 2018;4(2).                                                                                                                                                                                                                                                                                                                                                                                                                                                                                                                                                                                        | No vaccine of interest                         |
| 88. | Kostinov MP, Cherdantsev AP, Kuselman AI, Akhmatova NK, Kostinova AM, Deryabina EV, et al. Prospective randomized open-label comparative study of immunogenicity after subunit and polymeric subunit influenza vaccines administration among mothers and infants. <i>Human vaccines &amp; immunotherapeutics</i> . 2018;14(12):2971-8.                                                                                                                                                                                                                                                                                                                                                                                                                                                             | Secondary analysis of already included studies |
| 89. | Kumar R, Amarchand R, Narayan VV, Saha S, Lafond KE, Kapoor SK, et al. Challenges in conducting a community-based influenza vaccine trial in a rural community in northern India. <i>Human vaccines &amp; immunotherapeutics</i> . 2018;14(8):1909-13.                                                                                                                                                                                                                                                                                                                                                                                                                                                                                                                                             | No parallel RCT                                |
| 90. | Kunzi V, Klap JM, Seiberling MK, et al. Immunogenicity and safety of low dose virosomal adjuvanted influenza vaccine administered intradermally compared to intramuscular full dose administration. <i>Vaccine</i> . Jun 2 2009;27(27):3561-3567.                                                                                                                                                                                                                                                                                                                                                                                                                                                                                                                                                  | No relevant comparator                         |
| 91. | Langley J, Pastural E, Halperin S, McNeil S, ElSherif M, Mackinnon-Cameron D, et al. A randomized controlled study to evaluate the safety and reactogenicity of a novel rVLP-based plant virus nanoparticle adjuvant combined with seasonal trivalent influenza vaccine following single immunization in healthy adults 18–50 years of age. <i>Vaccines</i> . 2020;8(3):1-11.<br>Langley JM, Pastural E, Halperin S, McNeil S, ElSherif M, MacKinnon-Cameron D, et al. A phase I randomized, observer-blind, controlled, dose escalation trial of the safety and tolerability of a single intramuscular dose of a pal adjuvant (laboratory code, FB-631) co-administered with seasonal TIV (2013-2014) to healthy adults ≥18-50 years of age. <i>Open forum infectious diseases</i> . 2019;6:S966. | No vaccine of interest                         |
| 92. | Langley JM, Aoki F, Ward BJ, et al. A nasally administered trivalent inactivated influenza vaccine is well tolerated, stimulates both mucosal and systemic immunity, and potentially protects against influenza illness. <i>Vaccine</i> . Feb 24 2011;29(10):1921-1928.                                                                                                                                                                                                                                                                                                                                                                                                                                                                                                                            | No vaccine of interest                         |
| 93. | Langley JM, Halperin SA, McNeil S, et al. Safety and immunogenicity of a Proteosome -trivalent inactivated influenza vaccine, given nasally to healthy adults. <i>Vaccine</i> . 2006;24(10):1601-1608.                                                                                                                                                                                                                                                                                                                                                                                                                                                                                                                                                                                             | No vaccine of interest                         |
| 94. | Lee J, Lee KY, Kim JH, Kim CS, Eun BW, Kim HM, et al. Safety and Immunogenicity of an Egg-Cultivated Quadrivalent Inactivated Split-virion Influenza Vaccine (GC3110A) in Healthy Korean Children: a Randomized, Double-blinded, Active-controlled Phase III Study. <i>Journal of Korean medical science</i> . 2018;33(13):e100.                                                                                                                                                                                                                                                                                                                                                                                                                                                                   | No parallel RCT                                |
| 95. | Lee JH, Cho HK, Kim KH, Lee J, Kim YJ, Eun BW, et al. Evaluation of Waning Immunity at 6 Months after Both Trivalent and Quadrivalent Influenza Vaccination in Korean Children Aged 6-35 Months. <i>Journal of Korean medical science</i> . 2019;34(46):e279.                                                                                                                                                                                                                                                                                                                                                                                                                                                                                                                                      | Not relevant comparator                        |
| 96. | Lewis KDC, Ortiz JR, Rahman MZ, Levine MZ, Rudenko L, Wright PF, et al. Immunogenicity and Viral Shedding of Russian-Backbone, Seasonal, Trivalent, Live, Attenuated Influenza Vaccine in a Phase II, Randomized, Placebo-Controlled Trial Among Preschool-Aged Children in Urban Bangladesh. <i>Clinical infectious diseases</i> . 2019;69(5):777-85.                                                                                                                                                                                                                                                                                                                                                                                                                                             | No relevant outcome                            |
| 97. | L'Huillier A G, Ferreira VH, Hirzel C, Natori Y, Slomovic J, Ku T, et al. Cell-Mediated Immune Responses After Influenza Vaccination of Solid Organ Transplant Recipients: Secondary Outcomes Analyses of a Randomized Controlled Trial. <i>The Journal of infectious diseases</i> . 2020;221(1):53-62.                                                                                                                                                                                                                                                                                                                                                                                                                                                                                            | Secondary analysis of already included studies |

|      |                                                                                                                                                                                                                                                                                                                                                |                                                      |
|------|------------------------------------------------------------------------------------------------------------------------------------------------------------------------------------------------------------------------------------------------------------------------------------------------------------------------------------------------|------------------------------------------------------|
| 98.  | Ljungman P, Nahi H, Linde A. Vaccination of patients with haematological malignancies with one or two doses of influenza vaccine: a randomised study. <i>British journal of haematology</i> . Jul 2005;130(1):96-98.                                                                                                                           | No relevant comparator                               |
| 99.  | Loeb N, Andrew MK, Loeb M, Kuchel GA, Haynes L, McElhaney JE, et al. Frailty Is Associated With Increased Hemagglutination-Inhibition Titers in a 4-Year Randomized Trial Comparing Standard- and High-Dose Influenza Vaccination. <i>Open forum infectious diseases</i> . 2020;7(5):ofaa148.                                                  | No relevant outcome                                  |
| 100. | Loubet P, Launay O. Maternal influenza immunisation to reduce influenza infections and low birthweight in infants in resource-limited countries. <i>The Lancet Infectious Diseases</i> . 2017;17(9):890-892.                                                                                                                                   | No parallel RCT                                      |
| 101. | Maeda T, Shintani Y, Miyamoto H, et al. Prophylactic effect of inactivated influenza vaccine on young children. <i>Pediatrics international: official journal of the Japan Pediatric Society</i> . Feb 2002;44(1):43-46.                                                                                                                       | No relevant outcome                                  |
| 102. | Maeda T, Shintani Y, Nakano K, Terashima K, Yamada Y. Failure of inactivated influenza A vaccine to protect healthy children aged 6-24 months. <i>Pediatrics international: official journal of the Japan Pediatric Society</i> . Apr 2004;46(2):122-125.                                                                                      | No relevant outcome                                  |
| 103. | Mallory R, Nyborg AC, Kalyani R, Tsai LF, Block SL, Dubovsky F. A randomized study to evaluate the shedding and immunogenicity of H1N1 strains in trivalent and quadrivalent formulations of flumist in children 24 to <48 months of age. <i>Open forum infectious diseases</i> . 2018;5:S564-S5.                                              | Congress presentation of an article already included |
| 104. | Manuel O, Humar A, Berutto C, et al. Low-dose intradermal versus intramuscular trivalent inactivated seasonal influenza vaccine in lung transplant recipients. <i>The Journal of heart and lung transplantation: the official publication of the International Society for Heart Transplantation</i> . Jun 2011;30(6):679-684.                 | No relevant comparator                               |
| 105. | Marchisio P, Cavagna R, Maspes B, et al. Efficacy of intranasal virosomal influenza vaccine in the prevention of recurrent acute otitis media in children. <i>Clinical infectious diseases</i> . 2002;35(2):168-174.                                                                                                                           | No vaccine of interest                               |
| 106. | Maves R, Utz G, Richard S, Smith M, Collins L, Myers C, et al. Pragmatic assessment of influenza vaccine effectiveness in the DOD (PAIVED), influenza-like-illnesses (ILIS) sub-study at the marine corps recruit depot-San Diego, CA (MCRD-SD) during the 2018-2019 influenza season. <i>Open forum infectious diseases</i> . 2019;6:S970-S1. | No parallel RCT                                      |
| 107. | Mc Lean H, Levine M, King J, Spencer S, Flannery B, Belongia E. Randomized trial of high dose, adjuvanted, and standard inactivated influenza vaccine immune response against egg- and cell-propagated vaccine strains in older adults, 2016-2017 season. <i>Open forum infectious diseases</i> . 2018;5:S293-.                                | No relevant outcome                                  |
| 108. | McConeghy KW, Davidson HE, Canaday DH, Han L, Saade E, Mor V, et al. Cluster-randomized trial of adjuvanted vs. non-adjuvanted trivalent influenza vaccine in 823 U.S. nursing homes. <i>Clinical infectious diseases : an official publication of the Infectious Diseases Society of America</i> . 2020.                                      | No parallel RCT                                      |
| 109. | Meijer WJ, Wensing AMJ, Bos AA, Kuiphuis JCF, Hagelen EMM, Wilschut JC, et al. Influenza vaccination in healthcare workers; comparison of side effects and preferred route of administration of intradermal versus intramuscular administration. <i>Vaccine</i> . 2017;35(11):1517-23.                                                         | No parallel RCT                                      |
| 110. | Mendelman PM, Cordova J, Cho I. Safety, efficacy and effectiveness of the influenza virus vaccine, trivalent, types A and B, live, cold-adapted (CAIV-T) in healthy children and healthy adults. <i>Vaccine</i> . 2001;19(17-19):2221-2226.                                                                                                    | Secondary analysis of already included studies       |
| 111. | Menegon T, Baldo V, Bonello C, Dalla Costa D, Tommaso A, Trivello R. Influenza vaccines: antibody responses to split virus and MF59-adjuvanted subunit virus in an adult population. <i>European journal of epidemiology</i> . 1999;15(6):573-576.                                                                                             | No relevant outcome                                  |
| 112. | Metanat M., Salehi M., Sharifi-Mood B., M. S. Serum Antibody Responses after Intradermal Injection of Influenza Vaccine. <i>International Journal of Virology</i> . 2006;2:35-8.                                                                                                                                                               | No vaccine of interest                               |
| 113. | Miller RL, Cheng M, DiMango EA, Geromanos K, Rothman PB. T-cell responses and hypersensitivity to influenza and egg antigens among adults with asthma immunized with the influenza vaccine. <i>The Journal of allergy and clinical immunology</i> . Sep 2003;112(3):606-608.                                                                   | No parallel RCT                                      |
| 114. | Mo Z, Nong Y, Liu S, et al. Immunogenicity and safety of a trivalent inactivated influenza vaccine produced in Shenzhen, China. <i>Human vaccines and immunotherapeutics</i> . 2017:1-7.                                                                                                                                                       | No parallel RCT                                      |
| 115. | Moehling KK, Zimmerman RK, Nowalk MP, Jeng Lin C, Martin JM, Alcorn JF, et al. A randomized controlled trial of antibody response to 2018–19 cell-based vs. egg-based quadrivalent inactivated influenza vaccine in children. <i>Vaccine</i> . 2020.                                                                                           | No vaccine of interest                               |
| 116. | Mombelli M, Rettby N, Perreau M, Pascual M, Pantaleo G, Manuel O. Immunogenicity and safety of double versus standard dose of the seasonal influenza vaccine in solid-organ transplant recipients: A randomized controlled trial. <i>Vaccine</i> . 2018;36(41):6163-9.                                                                         | No vaccine of interest                               |
| 117. | Munoz FM, Jackson LA, Swamy GK, Edwards KM, Frey SE, Stephens I, et al. Safety and immunogenicity of seasonal trivalent inactivated influenza vaccines in pregnant women. <i>Vaccine</i> . 2018;36(52):8054-61.                                                                                                                                | Not relevant comparator                              |
| 118. | Munoz FM, Patel SM, Jackson LA, Swamy GK, Edwards KM, Frey SE, et al. Safety and immunogenicity of three seasonal inactivated influenza vaccines among pregnant women and antibody persistence in their infants. <i>Vaccine</i> . 2020;38(33):5355-63.                                                                                         | Not relevant comparator                              |

119. Nolan T, Lee MS, Cordova JM, et al. Safety and immunogenicity of a live-attenuated influenza vaccine blended and filled at two manufacturing facilities. *Vaccine*. 2003;21(11-12):1224-1231. No relevant comparator
120. Nougarede N, Bisceglia H, Rozières A, Goujon C, Boudet F, Laurent P, et al. Nine µg intradermal influenza vaccine and 15 µg intramuscular influenza vaccine induce similar cellular and humoral immune responses in adults. *Human vaccines & immunotherapeutics*. 2014;10(9):2713-20. No relevant outcome
121. Nunes MC, Cutland CL, Moultrie A, Jones S, Ortiz JR, Neuzil KM, et al. Immunogenicity and safety of different dosing schedules of trivalent inactivated influenza vaccine in pregnant women with HIV: a randomised controlled trial. *The lancet HIV*. 2020;7(2):e91-e103. No vaccine of interest
122. Oh CE, Choi UY, Eun BW, Lee TJ, Kim KH, Kim DH, et al. A Randomized, Double-blind, Active-controlled Clinical Trial of a Cell Culture-derived Inactivated Trivalent Influenza Vaccine (NBP607) in Healthy Children 6 Months Through 18 Years of Age. *Pediatric infectious disease journal*. 2018;37(6):605-11. No relevant comparator
123. Ojeda J, Arredondo JL, Salcedo P, Paredes-Paredes M, Dupuy M, Petit C, et al. Immunogenicity and safety of a multi-dose quadrivalent inactivated influenza vaccine in individuals aged 6 months to 17 years: a randomized phase III trial. *Human vaccines & immunotherapeutics*. 2020;16(6):1380-4. No relevant comparator
124. Omer SB, Clark DR, Aqil AR, Tapia MD, Nunes MC, Kozuki N, et al. Maternal Influenza Immunization and Prevention of Severe Clinical Pneumonia in Young Infants: Analysis of Randomized Controlled Trials Conducted in Nepal, Mali and South Africa. *The Pediatric infectious disease journal*. 2018;37(5):436-40. No vaccine of interest
125. Otten G, Matassa V, Ciarlet M, Leav B. A phase 1, randomized, observer blind, antigen and adjuvant dosage finding study to evaluate the safety and immunogenicity of an adjuvanted, trivalent subunit influenza vaccine in elderly subjects ≥65 years of age. *Open forum infectious diseases*. 2018;5:S747-. No vaccine of interest
125. Otten G, Matassa V, Ciarlet M, Leav B. A phase 1, randomized, observer blind, antigen and adjuvant dosage finding clinical trial to evaluate the safety and immunogenicity of an adjuvanted, trivalent subunit influenza vaccine in adults ≥65 years of age. *Vaccine*. 2020;38(3):578-87. No vaccine of interest
126. Pan SC, Hsieh SM, Lin CF, Hsu YS, Chang M, Chang SC. A randomized, double-blind, controlled clinical trial to evaluate the safety and immunogenicity of an intranasally administered trivalent inactivated influenza vaccine with adjuvant LTh(αK): A phase I study. *Vaccine*. 2019;37(14):1994-2003. No vaccine of interest
127. Patel SS, Bizjajeva S, Heijnen E, Oberye J. MF59-adjuvanted seasonal trivalent inactivated influenza vaccine: Safety and immunogenicity in young children at risk of influenza complications. *International journal of infectious diseases : IJID : official publication of the International Society for Infectious Diseases*. 2019;85s:S18-s25. Secondary analysis of already included studies
128. Phrommintikul A, Kuanprasert S, Wongcharoen W, Kanjanavanit R, Chaiwarith R, Sukonthasarn A. Influenza vaccination reduces cardiovascular events in patients with acute coronary syndrome. *European heart journal*. Jul 2011;32(14):1730-1735. No relevant outcome
129. Pillet S, Couillard J, Trépanier S, Poulin JF, Yassine-Diab B, Guy B, et al. Immunogenicity and safety of a quadrivalent plant-derived virus like particle influenza vaccine candidate-Two randomized Phase II clinical trials in 18 to 49 and ≥50 years old adults. *PLoS one*. 2019;14(6):e0216533. No vaccine of interest
130. Pleguezuelos O, Dille J, de Groen S, Oftung F, Niesters HGM, Islam MA, et al. Immunogenicity, Safety, and Efficacy of a Standalone Universal Influenza Vaccine, FLU-v, in Healthy Adults: a Randomized Clinical Trial. *Annals of internal medicine*. 2020;172(7):453-62. No vaccine of interest
130. Pleguezuelos O, James E, Fernandez A, Lopes V, Rosas LA, Cervantes-Medina A, et al. Efficacy of FLU-v, a broad-spectrum influenza vaccine, in a randomized phase IIb human influenza challenge study. *NPJ vaccines*. 2020;5(1). No vaccine of interest
131. Pleguezuelos O, Robinson S, Stoloff GA, Caparros-Wanderley W. Synthetic Influenza vaccine (FLU-v) stimulates cell mediated immunity in a double-blind, randomised, placebo-controlled Phase I trial. *Vaccine*. Jun 29 2012;30(31):4655-4660. No vaccine of interest
132. Powers DC, Fries LF, Murphy BR, Thumar B, Clements ML. In elderly persons live attenuated influenza A virus vaccines do not offer an advantage over inactivated virus vaccine in inducing serum or secretory antibodies or local immunologic memory. *Journal of clinical microbiology*. Mar 1991;29(3):498-505. No relevant outcome
133. Ramanathan RK, Potter DM, Belani CP, et al. Randomized trial of influenza vaccine with granulocyte-macrophage colony-stimulating factor or placebo in cancer patients. *Journal of clinical oncology: official journal of the American Society of Clinical Oncology*. Nov 1 2002;20(21):4313-4318. No relevant outcome
134. Robertson CA, Mercer M, Selmani A, Klein NP, Jeanfreau R, Greenberg DP. Safety and Immunogenicity of a Full-dose, Split-virion, Inactivated, Quadrivalent Influenza Vaccine in Healthy Children 6-35 Months of Age: A Randomized Controlled Clinical Trial. *The Pediatric infectious disease journal*. 2019;38(3):323-8. No vaccine of interest
135. Rudenko LG, Lonskaya NI, Klimov AI, Vasilieva RI, Ramirez A. Clinical and epidemiological evaluation of a live, cold-adapted influenza vaccine for 3-14-year-olds. *Bulletin of the world health organization*. 1996;74(1):77-84. No vaccine of interest
136. Rudenko LG, Ramirez A, Barro M, et al. The inoculation properties of live recombinant influenza vaccine types A and B used separately and jointly in children 3 to 14. *Voprosy virusologii*. 1991;36(6):472-474. No parallel RCT

137. Rudenko LG, Slepushkin AN, Monto AS, et al. Efficacy of live attenuated and inactivated influenza vaccines in schoolchildren and their unvaccinated contacts in Novgorod, Russia. *Journal of Infectious Diseases*. 1993;168(4):881-887. No parallel RCT
138. Sanchez L, Matsuoka O, Inoue S, Inoue T, Meng Y, Nakama T, et al. Immunogenicity and safety of high-dose quadrivalent influenza vaccine in Japanese adults  $\geq 65$  years of age: a randomized controlled clinical trial. *Human vaccines & immunotherapeutics*. 2020;16(4):858-66. No vaccine of interest
139. Sarker M, Branche A, Peasley M, Topham D. Comparison of antibody responses to vaccination with a pure hemagglutinin influenza vaccine (RHA) and licensed subvirion influenza vaccine made in eggs or cell culture in adults 60 years and older. *Open forum infectious diseases*. 2019;6:S963-. No relevant outcome
140. Sarsenbayeva G, Issagulov T, Kassenov M, Abitay R, Orynbayev M, Stukova M, et al. Safety and immunogenicity of trivalent inactivated influenza vaccine in adults 60 years of age and older: a phase II, a randomized, comparative trial in Kazakhstan. *Human vaccines & immunotherapeutics*. 2020;16(8):1791-7. No relevant comparator
141. Sarsenbayeva G, Volgin Y, Kassenov M, et al. Immunogenicity and safety of a novel seasonal influenza preservative-free vaccine manufactured in Kazakhstan: results of a randomized, comparative, phase II clinical trial in adults. *Human vaccines and immunotherapeutics*. 2017:1-6. No relevant comparator
142. Schaad UB, Bühlmann U, Burger R, et al. Comparison of immunogenicity and safety of a virosome influenza vaccine with those of a subunit influenza vaccine in pediatric patients with cystic fibrosis. *Antimicrobial agents and chemotherapy*. 2000;44(5):1163-1167. No relevant comparator
143. Şener M, Gürsel G, Türkteş H. Effects of inactivated influenza virus vaccination on bronchial reactivity symptom scores and peak expiratory flow variability in patients with asthma. *Journal of Asthma*. 1999;36(2):165-169. No parallel RCT
144. Seo YB, Baek JH, Lee J, et al. Long-Term Immunogenicity and Safety of a Conventional Influenza Vaccine in Patients with Type 2 Diabetes. *Clinical and vaccine immunology*. 2015;22(11):1160-1165. No parallel RCT
145. Simões EAF, Nunes MC, Carosone-Link P, Madimabe R, Ortiz JR, Neuzil KM, et al. Trivalent influenza vaccination randomized control trial of pregnant women and adverse fetal outcomes. *Vaccine*. 2019;37(36):5397-403. Secondary analysis of already included studies
146. Skowronski DM, Hottes TS, Chong M, et al. Randomized controlled trial of dose response to influenza vaccine in children aged 6 to 23 months. *Pediatrics*. 2011;128(2): e276-289. No relevant comparator
147. Slepushkin AN, Obrosova-Serova NP, Burtseva EI, et al. [A comparative study of the inoculation properties of live recombinant and inactivated influenza vaccines made from strain A/Philippines/2/82 (H3N2) in 8- to 15-year-old children]. *Voprosy virusologii*. Sep-Oct 1991;36(5):372-374. No vaccine of interest
148. Song JY, Cheong HJ, Hyun HJ, Seo YB, Lee J, Wie SH, et al. Immunogenicity and safety of a 13-valent pneumococcal conjugate vaccine and an MF59-adjuvanted influenza vaccine after concomitant vaccination in  $\geq 60$ -year-old adults. *Vaccine*. 2017;35(2):313-20. No relevant outcome
149. Song JY, Cheong HJ, Noh JY, Seo YB, Choi WS, Cho GJ, et al. Long-term and cross-reactive immunogenicity of inactivated trivalent influenza vaccine in the elderly: MF59-adjuvanted vaccine versus unadjuvanted vaccine. *Journal of medical virology*. 2013;85(9):1591-7. No relevant outcome
150. Song JY, Cheong HJ, Noh JY, Yang TU, Seo YB, Hong KW, et al. Long-term immunogenicity of the influenza vaccine at reduced intradermal and full intramuscular doses among healthy young adults. *Clin Exp Vaccine Res*. 2013;2(2):115-9. No vaccine of interest
151. Song JY, Cheong HJ, Tsai TF, Chang HA, Choi MJ, Jeon JH, et al. Immunogenicity and safety of concomitant MF59-adjuvanted influenza vaccine and 23-valent pneumococcal polysaccharide vaccine administration in older adults. *Vaccine*. 2015;33(36):4647-52. No relevant outcome
152. Song JY, Cheong HJ, Woo HJ, et al. Immunogenicity and safety of trivalent inactivated influenza vaccine: a randomized, double-blind, multi-center, phase 3 clinical trial in a vaccine-limited country. *Journal of korean medical science*. 2011;26(2):191-195. No relevant comparator
153. Statler VA, Albano FR, Airey J, Sawlwin DC, Graves Jones A, Matassa V, et al. Immunogenicity and safety of a quadrivalent inactivated influenza vaccine in children 6-59 months of age: A phase 3, randomized, noninferiority study. *Vaccine*. 2019;37(2):343-51. No relevant comparator
154. Sullender WM, Fowler KB, Gupta V, Krishnan A, Ram Purakayastha D, Srungaram Vln R, et al. Efficacy of inactivated trivalent influenza vaccine in rural India: a 3-year cluster-randomised controlled trial. *The Lancet Global health*. 2019;7(7):e940-e50. No parallel RCT
155. Tackenberg B, Schneider M, Blaes F, et al. Acetylcholine Receptor Antibody Titers and Clinical Course after Influenza Vaccination in Patients with Myasthenia Gravis: A Double-Blind Randomized Controlled Trial (ProPATlent-Trial). *EBioMedicine*. Feb 2018; 28:143-150. No relevant outcome
156. Tasker SA, O'Brien WA, Treanor JJ, et al. Effects of influenza vaccination in HIV-infected adults: a double-blind, placebo-controlled trial. *Vaccine*. May-Jun 1998;16(9-10):1039-1042. No relevant outcome

157. Teh B, Leung V, Mordant F, Sullivan S, Joyce T, Harrison S, et al. A randomised trial of two 2-dose influenza vaccination strategies for patients following autologous haematopoietic stem cell transplantation. *Hemasphere*. 2020;4:116-7. No vaccine of interest
158. Treanor JJ, Mattison HR, Dumyati G, et al. Protective efficacy of combined live intranasal and inactivated influenza A virus vaccines in the elderly. *Annals of internal medicine*. 1992;117(8):625-633. No vaccine of interest
159. Useche M, Agnihotram R, Bernatsky S, Ward B, Colmegna I. The high dose influenza vaccine increases immune protection in both adults and elderly seropositive RA patients. *Arthritis and Rheumatology*. 2019;71:3680-1. No relevant outcome
160. Van Damme P, Oosterhuis-Kafeja F, Van der Wielen M, Almagor Y, Sharon O, Levin Y. Safety and efficacy of a novel microneedle device for dose sparing intradermal influenza vaccination in healthy adults. *Vaccine*. Jan 14 2009;27(3):454-459. No vaccine of interest
161. Vesikari T, Kirstein J, Devota Go G, Leav B, Ruzicky ME, Isakov L, et al. Efficacy, immunogenicity, and safety evaluation of an MF59-adjuvanted quadrivalent influenza virus vaccine compared with non-adjuvanted influenza vaccine in children: a multicentre, randomised controlled, observer-blinded, phase 3 trial. *The Lancet Respiratory medicine*. 2018;6(5):345-56. No relevant comparator
162. Vesikari T, Richardus JH, Berglund J, et al. Immunogenicity and Safety of a Trivalent Inactivated Influenza Vaccine in Children 6 Months to 17 Years of Age, Previously Vaccinated with an AS03-Adjuvanted A(H1N1) Pdm09 Vaccine: two Open-label, Randomized Trials. *Pediatric infectious disease journal*. 2015;34(7):774-782. No relevant comparator



## References of included studies

1. Abadoğlu Ö, Mungan D, Paşaoğlu G, Çelik G, Misirligil Z. Influenza vaccination in patients with asthma: Effect on the frequency of upper respiratory tract infections and exacerbations. *Journal of Asthma*. 2004;41(3):279-283.
2. Allsup S, Haycox A, Regan M, Gosney M. Is influenza vaccination cost effective for healthy people between ages 65 and 74 years? A randomised controlled trial. *Vaccine*. Dec 16 2004;23(5):639-645.  
Allsup SJ, Gosney M, Regan M, Haycox A, Fear S, Johnstone FC. Side effects of influenza vaccination in healthy older people: a randomised single-blind placebo-controlled trial. *Gerontology*. 2001;47(6):311-314.
3. Anh DD, Thiem VD, Anh NTH, et al. Randomized safety and immunogenicity trial of a seasonal trivalent inactivated split virion influenza vaccine (IVACFLU-S) in healthy young Vietnamese adults. *Vaccine*. Oct 26 2016;34(45):5457-5462.
4. Ansaldi F, Orsi A, Florentiis D, et al. Head-to-head comparison of an intradermal and a virosome influenza vaccine in patients over the age of 60: evaluation of immunogenicity, cross-protection, safety and tolerability. *Human vaccines & immunotherapeutics*. 2013;9(3):591-598.
5. Ansaldi F, Valle L, De Florentiis D, et al. Phase 4 randomized trial of intradermal low-antigen-content inactivated influenza vaccine vs. standard-dose intramuscular vaccine in HIV-1-infected adults. *Human Vaccines and Immunotherapeutics*. 2012;8(8):1048-1052.
6. Arnou R, Eavis P, Pardo JR, Ambrozaitis A, Kazek MP, Weber F. Immunogenicity, large scale safety and lot consistency of an intradermal influenza vaccine in adults aged 18-60 years: randomized, controlled, phase III trial. *Human vaccines*. 2010;6(4):346-354.
7. Arnou R, Icardi G, De Decker M, et al. Intradermal influenza vaccine for older adults: a randomized controlled multicenter phase III study. *Vaccine*. Dec 9 2009;27(52):7304-7312.
8. Ashkenazi S, Vertruyen A, Arístegui J, et al. Superior relative efficacy of live attenuated influenza vaccine compared with inactivated influenza vaccine in young children with recurrent respiratory tract infections. *Pediatric infectious disease journal*. 2006;25(10):870-879.
9. Auewarakul P, Kositanont U, Sornsathapornkul P, Tothong P, Kanyok R, Thongcharoen P. Antibody responses after dose-sparing intradermal influenza vaccination. *Vaccine*. 2007;25(4):659-663.
10. Baldo V, Baldovin T, Floreani A, Carraro AM, Trivello R. MF59-adjuvanted influenza vaccine confers superior immunogenicity in adult subjects (18-60 years of age) with chronic diseases who are at risk of post-influenza complications. *Vaccine*. 2007;25(20):3955-3961.
11. Baluch A, Humar A, Eurich D, et al. Randomized controlled trial of high-dose intradermal versus standard-dose intramuscular influenza vaccine in organ transplant recipients. *American journal of transplantation*. 2013;13(4):1026-1033.
12. Barrett PN, Berezuk G, Fritsch S, et al. Efficacy, safety, and immunogenicity of a Vero-cell-culture-derived trivalent influenza vaccine: a multicentre, double-blind, randomised, placebo-controlled trial. *Lancet (london, england)*. 2011;377(9767):751-759.
13. Bart S, Cannon K, Herrington D, et al. Immunogenicity and safety of a cell culture-based quadrivalent influenza vaccine in adults: a Phase III, double-blind, multicenter, randomized, non-inferiority study. *Human vaccines & immunotherapeutics*. 2016;12(9):2278-2288.
14. Baxter R, Patriarca PA, Ensor K, Izikson R, Goldenthal KL, Cox MM. Evaluation of the safety, reactogenicity and immunogenicity of FluBlok trivalent recombinant baculovirus-expressed hemagglutinin influenza vaccine administered intramuscularly to healthy adults 50-64 years of age. *Vaccine*. 2011;29(12):2272-2278.
15. Belongia EA, Levine MZ, Olaiya O, Gross FL, King JP, Flannery B, et al. Clinical trial to assess immunogenicity of high-dose, adjuvanted, and recombinant influenza vaccines against cell-grown A(H3N2) viruses in adults 65 to 74 years, 2017-2018. *Vaccine*. 2020;38(15):3121-8.
16. Belshe RB, Edwards KM, Vesikari T, et al. Live attenuated versus inactivated influenza vaccine in infants and young children. *The New England journal of medicine*. Feb 15 2007;356(7):685-696.
17. Belshe RB, Gruber WC, Mendelman PM, et al. Efficacy of vaccination with live attenuated, cold-adapted, trivalent, intranasal influenza virus vaccine against a variant (A/Sydney) not contained in the vaccine. *Journal of pediatrics*. 2000;136(2):168-175.
18. Belshe RB, Mendelman PM, Treanor J, et al. The efficacy of live attenuated, cold-adapted, trivalent, intranasal influenza virus vaccine in children. *New England Journal of Medicine*. 1998;338(20):1405-1412.  
Longini IM, Halloran ME, Nizam A, et al. Estimation of the efficacy of live, attenuated influenza vaccine from a two-year, multi-center vaccine trial: implications for influenza epidemic control. *Vaccine*. Mar 17 2000;18(18):1902-1909.  
Piedra PA, Yan L, Kotloff K, et al. Safety of the trivalent, cold-adapted influenza vaccine in preschool-aged children. *Pediatrics*. Oct 2002;110(4):662-672.
19. Belshe RB, Newman FK, Wilkins K, et al. Comparative immunogenicity of trivalent influenza vaccine administered by intradermal or intramuscular route in healthy adults. *Vaccine*. 2007;25(37-38):6755-6763.
20. Belshe RB, Swierkosz EM, Anderson EL, Newman FK, Nugent SL, Maassab HF. Immunization of infants and young children with live attenuated trivalent cold-recombinant influenza A H1N1, H3N2, and B vaccine. *Journal of infectious diseases*. 1992;165(4):727-732.
21. Ben-Yehuda A, Joseph A, Barenholz Y, et al. Immunogenicity and safety of a novel IL-2-supplemented liposomal influenza vaccine (INFLUSOME-VAC) in nursing-home residents. *Vaccine*. 2003;21(23):3169-3178.
22. Ben-Yehuda A, Joseph A, Zeira E, et al. Immunogenicity and safety of a novel liposomal influenza subunit vaccine (INFLUSOME-VAC) in young adults. *Journal of medical virology*. 2003;69(4):560-567.
23. Beran J, Ambrozaitis A, Laiskonis A, et al. Intradermal influenza vaccination of healthy adults using a new microinjection system: a 3-year randomised controlled safety and immunogenicity trial. *BMC medicine*. Apr 2 2009;7:13.
24. Beran J, Peeters M, Dewé W, Raupachová J, Hobzová L, Devaster JM. Immunogenicity and safety of quadrivalent versus trivalent inactivated influenza vaccine: a randomized, controlled trial in adults. *BMC infectious diseases*. 2013; 13:224.
25. Beran J, Vesikari T, Wertzova V, et al. Efficacy of inactivated split-virus influenza vaccine against culture-confirmed influenza in healthy adults: a prospective, randomized, placebo-controlled trial. *The Journal of infectious diseases*. Dec 15 2009;200(12):1861-1869.

26. Beran J, Wertzova V, Honegr K, et al. Challenge of conducting a placebo-controlled randomized efficacy study for influenza vaccine in a season with low attack rate and a mismatched vaccine B strain: a concrete example. *BMC infectious diseases*. Jan 17 2009;9:2.
27. Bergen R, Black S, Shinefield H, et al. Safety of cold-adapted live attenuated influenza vaccine in a large cohort of children and adolescents. *The Pediatric infectious disease journal*. Feb 2004;23(2):138-144.  
Baxter RP, Lewis N, Fireman B, Hansen J, Klein NP, Ortiz JR. Live Attenuated Influenza Vaccination Before 3 Years of Age and Subsequent Development of Asthma: A 14-year Follow-up Study. *The Pediatric infectious disease journal*. May 2018;37(5):383-386.
28. Block SL, Falloon J, Hirschfield JA, et al. Immunogenicity and safety of a quadrivalent live attenuated influenza vaccine in children. *The Pediatric infectious disease journal*. Jul 2012;31(7):745-751.
29. Block SL, Yi T, Sheldon E, Dubovsky F, Falloon J. A randomized, double-blind noninferiority study of quadrivalent live attenuated influenza vaccine in adults. *Vaccine*. Nov 21 2011;29(50):9391-9397.
30. Boonnak K, Dhitavat J, Thantamnu N, et al. Immune responses to intradermal and intramuscular inactivated influenza vaccine among older age group. *Vaccine*. 2017;35:7339-7346.(no pagination).
31. Bracco Neto H, Farhat CK, Tregnaghi MW, et al. Efficacy and safety of 1 and 2 doses of live attenuated influenza vaccine in vaccine-naive children. *The Pediatric infectious disease journal*. May 2009;28(5):365-371.
32. Brady RC, Jackson LA, Frey SE, Shane AL, Walter EB, Swamy GK, et al. Randomized trial comparing the safety and antibody responses to live attenuated versus inactivated influenza vaccine when administered to breastfeeding women. *Vaccine*. 2018;36(31):4663-71.
33. Bridges CB, Thompson WW, Meltzer MI, et al. Effectiveness and cost-benefit of influenza vaccination of healthy working adults: A randomized controlled trial. *Jama*. Oct 4 2000;284(13):1655-1663.
34. Brooks WA, Zaman K, Lewis KD, et al. Efficacy of a Russian-backbone live attenuated influenza vaccine among young children in Bangladesh: a randomised, double-blind, placebo-controlled trial. *The Lancet. Global health*. Dec 2016;4(12):e946-e954.  
Rotrosen E, Zaman K, Feser J, et al. Influenza among Young Children in Bangladesh: Clinical Characteristics and Outcomes from a Randomized Clinical Trial. *Clinical Infectious Diseases*. 2017;65(11):1914-1920.
35. Bueving HJ, Bernsen RM, de Jongste JC, et al. Influenza vaccination in children with asthma: randomized doubleblind placebo-controlled trial. *American Journal of Respiratory & Critical Care Medicine*. 2004;169(4):488-93.  
Bueving HJ, Bernsen RM, de Jongste JC, et al. Does influenza vaccination exacerbate asthma in children? *Vaccine*. Nov 15 2004;23(1):91-96.  
Bueving HJ, van der Wouden JC, Raat H, et al. Influenza vaccination in asthmatic children: effects on quality of life and symptoms. *The European respiratory journal*. Dec 2004;24(6):925-931.
36. Cadorna-Carlos JB, Nolan T, Borja-Tabora CF, et al. Safety, immunogenicity, and lot-to-lot consistency of a quadrivalent inactivated influenza vaccine in children, adolescents, and adults: A randomized, controlled, phase III trial. *Vaccine*. May 15 2015;33(21):2485-2492.
37. Caldera F, Hillman L, Saha S, Wald A, Grimes I, Zhang Y, et al. Immunogenicity of High Dose Influenza Vaccine for Patients with Inflammatory Bowel Disease on Anti-TNF Monotherapy: A Randomized Clinical Trial. *Inflammatory bowel diseases*. 2020;26(4):593-602.
38. Carr S, Allison KJ, Van De Velde LA, et al. Safety and immunogenicity of live attenuated and inactivated influenza vaccines in children with cancer. *The Journal of infectious diseases*. Nov 15 2011;204(10):1475-1482.
39. Chan TC, Hung IFN, Chan KH, et al. Immunogenicity and safety of intradermal trivalent influenza vaccination in nursing home older adults: A randomized controlled trial. *Journal of the American Medical Directors Association*. 2014;15(8):607.e605-607.e612.
40. Chang LJ, Meng Y, Janosczyk H, Landolfi V, Talbot HK. Safety and immunogenicity of high-dose quadrivalent influenza vaccine in adults  $\geq 65$  years of age: A phase 3 randomized clinical trial. *Vaccine*. 2019;37(39):5825-34.
41. Chi RC, Rock MT, Neuzil KM. Immunogenicity and safety of intradermal influenza vaccination in healthy older adults. *Clinical infectious diseases: an official publication of the Infectious Diseases Society of America*. May 15 2010;50(10):1331-1338.
42. Chiu SS, Chan KH, Tu W, Lau YL, Peiris JS. Immunogenicity and safety of intradermal versus intramuscular route of influenza immunization in infants less than 6 months of age: a randomized controlled trial. *Vaccine*. Jul 30 2009;27(35):4834-4839.
43. Chiu SS, Peiris JSM, Chan KH, Wong WHS, Yu LL. Immunogenicity and safety of intradermal influenza immunization at a reduced dose in healthy children. *Pediatrics*. 2007;119(6):1076-1082
44. Choi WS, Noh JY, Lee J, Choi JY, Lee JS, Kim MS, Kim HS, Bang J, Lavis N, Kim WJ. Immunogenicity and safety of a split-virion quadrivalent influenza vaccine in adults 18-60 years of age in the Republic of Korea. *Human vaccines and immunotherapeutics*. 2018;14(3):587-592.
45. Choi WS, Noh JY, Song JY, Cheong HJ, Wie SH, Lee JS, et al. Immunogenicity and safety of a cell culture-derived inactivated quadrivalent influenza vaccine (NBP607-QIV): A randomized, double-blind, multi-center, phase III clinical trial in adults and elderly subjects. *Human Vaccines and Immunotherapeutics*. 2017;13(7):1653-1660.
46. Chu K, Xu K, Tang R, Tian X, Hu J, Yang T, et al. Immunogenicity and safety of an inactivated quadrivalent influenza vaccine: A randomized, double-blind, controlled phase III study in healthy population aged  $\geq 3$  years. *Vaccine*. 2020;38(37):5940-6.
47. Chuaychoo B, Kositanont U, Niyomthong P, Rittayamai N, Srisuma S, Rattanaengloet K, et al. Comparison of immunogenicity between intradermal and intramuscular injections of repeated annual identical influenza virus strains post-pandemic (2011-2012) in COPD patients. *Human Vaccines and Immunotherapeutics*. 2020;16(6):1371-9.
48. Claeys C, Zaman K, Dbaibo G, Li P, Izu A, Kosalaraksa P, et al. Prevention of vaccine-matched and mismatched influenza in children aged 6-35 months: a multinational randomised trial across five influenza seasons. *The Lancet Child & adolescent health*. 2018;2(5):338-49.
49. Colmegna I, Useche ML, Rodriguez K, McCormack D, Alfonso G, Patel A, et al. Immunogenicity and safety of high-dose versus standard-dose inactivated influenza vaccine in rheumatoid arthritis patients: a randomised, double-blind, active-comparator trial. *The lancet rheumatology*. 2020;2(1):e14-e23.

50. Colombo C, Argiolas L, Vecchia C, Negri E, Meloni G, Meloni T. Influenza vaccine in healthy preschool children. *Revue d'épidémiologie ET de sante publique*. 2001;49(2):157-162.
51. Couch RB, Winokur P, Brady R, et al. Safety and immunogenicity of a high dosage trivalent influenza vaccine among elderly subjects. *Vaccine*. 2007;25(44):7656-7663.  
Cate TR, Rayford Y, Nino D, et al. A high dosage influenza vaccine induced significantly more neuraminidase antibody than standard vaccine among elderly subjects. *Vaccine*. Feb 25 2010;28(9):2076-2079.
52. Cowling BJ, Ng S, Ma ESK, et al. Protective efficacy of seasonal influenza vaccination against seasonal and pandemic influenza virus infection during 2009 in Hong Kong. *Clinical Infectious Diseases*. 2010;51(12):1370-1379.  
Cowling BJ, Fang VJ, Nishiura H, et al. Increased risk of noninfluenza respiratory virus infections associated with receipt of inactivated influenza vaccine. *Clinical infectious diseases*. 2012;54(12):1778-1783.
53. Cowling BJ, Perera RA, Fang VJ, et al. Incidence of influenza virus infections in children in Hong Kong in a 3-year randomized placebo-controlled vaccine study, 2009-2012. *Clinical infectious diseases: an official publication of the Infectious Diseases Society of America*. Aug 15 2014;59(4):517-524.
54. Cowling BJ, Perera RAPM, Valkenburg SA, Leung NHL, Iuliano AD, Tam YH, et al. Comparative immunogenicity of several enhanced influenza vaccine options for older adults: A randomized, controlled trial. *Clinical Infectious Diseases*. 2020;71(7):1704-14.  
Cowling BJ, Thompson MG, Ng TWY, Fang VJ, Perera R, Leung NHL, et al. Comparative Reactogenicity of Enhanced Influenza Vaccines in Older Adults. *The Journal of infectious diseases*. 2020;222(8):1383-91.
55. Cruz-Valdez A, Valdez-Zapata G, Patel SS, et al. MF59-adjuvanted influenza vaccine (FLUAD) elicits higher immune responses than a non-adjuvanted influenza vaccine (Fluzone): a randomized, multicenter, Phase III pediatric trial in Mexico. *Human vaccines and immunotherapeutics*. 20172018;14(2):386-95.:1-10.
56. de Bruijn I, Meyer I, Gerez L, Nauta J, Giezman K, Palache B. Antibody induction by virosomal, MF59-adjuvanted, or conventional influenza vaccines in the elderly. *Vaccine*. Dec 21 2007;26(1):119-127.
57. de Bruijn IA, Nauta J, Gerez L, Palache AM. The virosomal influenza vaccine Invivac: immunogenicity and tolerability compared to an adjuvanted influenza vaccine (Fluad in elderly subjects. *Vaccine*. Nov 10 2006;24(44-46):6629-6631.
58. De Donato S, Granoff D, Minutello M, et al. Safety and immunogenicity of MF59-adjuvanted influenza vaccine in the elderly. *Vaccine*. Aug 6 1999;17(23-24):3094-3101.
59. De Villiers PJ, Steele AD, Hiemstra LA, et al. Efficacy and safety of a live attenuated influenza vaccine in adults 60 years of age and older. *Vaccine*. Dec 10 2009;28(1):228-234.
60. Della Cioppa G, Vesikari T, Sokal E, Lindert K, Nicolay U. Trivalent and quadrivalent MF59((R))-adjuvanted influenza vaccine in young children: a dose- and schedule-finding study. *Vaccine*. Nov 3 2011;29(47):8696-8704.
61. Desheva IA, Danini GV, Grigor'eva EP, et al. The investigation of the safety, genetic stability and immunogenicity of live influenza vaccine for adults in vaccination of 3-6 years old children. *Voprosy virusologii*. 2002;47(4):21-24.
62. Diallo A, Victor JC, Feser J, Ortiz JR, Kanasa-Thanan N, Ndiaye M, et al. Immunogenicity and safety of MF59-adjuvanted and full-dose unadjuvanted trivalent inactivated influenza vaccines among vaccine-naïve children in a randomized clinical trial in rural Senegal. *Vaccine*. 2018;36(43):6424-32.
63. DiazGranados CA, Dunning AJ, Jordanov E, Landolfi V, Denis M, Talbot HK. High-dose trivalent influenza vaccine compared to standard dose vaccine in elderly adults: safety, immunogenicity and relative efficacy during the 2009-2010 season. *Vaccine*. Jan 30 2013;31(6):861-866.
64. DiazGranados CA, Dunning AJ, Kimmel M, et al. Efficacy of high-dose versus standard-dose influenza vaccine in older adults. *The New England journal of medicine*. Aug 14 2014;371(7):635-645.  
DiazGranados CA, Dunning AJ, Robertson CA, Talbot HK, Landolfi VA, Greenberg DP. Efficacy and immunogenicity of high-dose influenza vaccine in older adults by age, comorbidities, and frailty. *Vaccine*. 2015;33(36):4565-4571.
65. DiazGranados CA, Saway W, Gouaux J, et al. Safety and immunogenicity of high-dose trivalent inactivated influenza vaccine in adults 50-64 years of age. *Vaccine*. Dec 16 2015;33(51):7188-7193.
66. Domachowske JB, Pankow-Culot H, Bautista M, et al. A randomized trial of candidate inactivated quadrivalent influenza vaccine versus trivalent influenza vaccines in children aged 3-17 years. *The Journal of infectious diseases*. Jun 15 2013;207(12):1878-1887.
67. Dunkle LM, Izikson R, Patriarca P, et al. Efficacy of recombinant influenza vaccine in adults 50 years of age or older. *New England Journal of Medicine*. 2017;376(25):2427-2436.
68. Dunkle LM, Izikson R, Patriarca PA, Goldenthal KL, Cox M, Treanor JJ. Safety and Immunogenicity of a Recombinant Influenza Vaccine: A Randomized Trial. *Pediatrics*. 2018;141(5).
69. Dunkle LM, Izikson R, Patriarca PA, Goldenthal KL, Muse D, Cox MMJ. Randomized comparison of immunogenicity and safety of quadrivalent recombinant versus inactivated influenza vaccine in healthy adults 18-49 years of age. *Journal of Infectious Diseases*. 2017;216(10):1219-1226.
70. Durando P, Fenoglio D, Boschini A, et al. Safety and immunogenicity of two influenza virus subunit vaccines, with or without MF59 adjuvant, administered to human immunodeficiency virus type 1-seropositive and -seronegative adults. *Clinical and vaccine immunology : CVI*. Feb 2008;15(2):253-259.
71. Englund JA, Walter E, Black S, et al. Safety and immunogenicity of trivalent inactivated influenza vaccine in infants: a randomized double-blind placebo-controlled study. *The Pediatric infectious disease journal*. Feb 2010;29(2):105-110.
72. Esposito S, Cecinati V, Scicchitano B, et al. Impact of influenza-like illness and effectiveness of influenza vaccination in oncohematological children who have completed cancer therapy. *Vaccine*. Feb 10 2010;28(6):1558-1565.
73. Esposito S, Daleno C, Picciolli I, et al. Immunogenicity and safety of intradermal influenza vaccine in children. *Vaccine*. Oct 13 2011;29(44):7606-7610.

74. Esposito S, Mastrolia MV, Ghio L, et al. Influenza immunization in hemodialyzed or kidney transplanted adolescents and young adults. *Expert review of vaccines*. Aug 2014;13(8):1059-1066.
75. Essink B, Fierro C, Rosen J, Figueroa AL, Zhang B, Verhoeven C, et al. Immunogenicity and safety of MF59-adjuvanted quadrivalent influenza vaccine versus standard and alternate B strain MF59-adjuvanted trivalent influenza vaccines in older adults. *Vaccine*. 2020;38(2):242-50.
76. Evison J, Farese S, Seitz M, Uehlinger DE, Furrer H, Muhlemann K. Randomized, double-blind comparative trial of subunit and virosomal influenza vaccines for immunocompromised patients. *Clinical infectious diseases: an official publication of the Infectious Diseases Society of America*. May 15 2009;48(10):1402-1412.
77. Falsey AR, Treanor JJ, Tornieporth N, Capellan J, Gorse GJ. Randomized, double-blind controlled phase 3 trial comparing the immunogenicity of high-dose and standard-dose influenza vaccine in adults 65 years of age and older. *The Journal of infectious diseases*. Jul 15 2009;200(2):172-180.
78. Fayyaz Jahani F, Karramyar M, Ahmadnezhad E. Inactivated-trivalent influenza vaccination in asthmatic under-5 children: A randomized double-blind placebo trial. *Archives of Disease in Childhood*. 2012;97:A516.
79. Fleming DM, Crovari P, Wahn U, et al. Comparison of the efficacy and safety of live attenuated cold-adapted influenza vaccine, trivalent, with trivalent inactivated influenza virus vaccine in children and adolescents with asthma. *The Pediatric infectious disease journal*. Oct 2006;25(10):860-869.
80. Forrest BD, Steele AD, Hiemstra L, Rappaport R, Ambrose CS, Gruber WC. A prospective, randomized, open-label trial comparing the safety and efficacy of trivalent live attenuated and inactivated influenza vaccines in adults 60 years of age and older. *Vaccine*. May 9 2011;29(20):3633-3639.
81. Frenck RW, Jr., Belshe R, Brady RC, et al. Comparison of the immunogenicity and safety of a split-virion, inactivated, trivalent influenza vaccine (Fluzone(R)) administered by intradermal and intramuscular route in healthy adults. *Vaccine*. Aug 5 2011;29(34):5666-5674.
82. Frey S, Poland G, Percell S, Podda A. Comparison of the safety, tolerability, and immunogenicity of a MF59-adjuvanted influenza vaccine and a non-adjuvanted influenza vaccine in non-elderly adults. *Vaccine*. Oct 1 2003;21(27-30):4234-4237.
83. Frey S, Vesikari T, Szymczakiewicz-Multanowska A, et al. Clinical efficacy of cell culture-derived and egg-derived inactivated subunit influenza vaccines in healthy adults. *Clinical infectious diseases: an official publication of the Infectious Diseases Society of America*. Nov 1 2010;51(9):997-1004.
84. Frey SE, Reyes M, Reynales H, et al. Comparison of the safety and immunogenicity of an MF59-adjuvanted with a non-adjuvanted seasonal influenza vaccine in elderly subjects. *Vaccine*. 2014;32(39):5027-5034.
85. Gabutti G, Guido M, Durando P, et al. Safety and immunogenicity of conventional subunit and MF59-adjuvanted influenza vaccines in human immunodeficiency virus-1-seropositive patients. *Journal of International Medical Research*. 2005;33(4):406-416.
86. Gasparini R, Pozzi T, Montomoli E, et al. Increased immunogenicity of the MF59-adjuvanted influenza vaccine compared to a conventional subunit vaccine in elderly subjects. *European journal of epidemiology*. 2001;17(2):135-140.
87. GiaQuinta S, Michaels MG, McCullers JA, et al. Randomized, double-blind comparison of standard-dose vs. high-dose trivalent inactivated influenza vaccine in pediatric solid organ transplant patients. *Pediatric transplantation*. Mar 2015;19(2):219-228.
88. Gorse GJ, Falsey AR, Fling JA, Poling TL, Strout CB, Tsang PH. Intradermally-administered influenza virus vaccine is safe and immunogenic in healthy adults 18-64 years of age. *Vaccine*. May 1 2013;31(19):2358-2365.
89. Gorse GJ, Falsey AR, Johnson CM, et al. Safety and immunogenicity of revaccination with reduced dose intradermal and standard dose intramuscular influenza vaccines in adults 18-64 years of age. *Vaccine*. Dec 5 2013;31(50):6034-6040.
90. Gorse GJ, Falsey AR, Ozol-Godfrey A, Landolfi V, Tsang PH. Safety and immunogenicity of a quadrivalent intradermal influenza vaccine in adults. *Vaccine*. Feb 25 2015;33(9):1151-1159.
91. Govaert Th ME, Dinant GJ, Aretz K, Masurel N, Sprenger MJW, Knottnerus JA. Adverse reactions to influenza vaccine in elderly people: Randomised double blind placebo controlled trial. *British Medical Journal*. 1993;307(6910):988-990.  
Govaert Th ME, Thijs CTMCN, Masurel N, Sprenger MJW, Dinant GJ, Knottnerus JA. The efficacy of influenza vaccination in elderly individuals: A randomized double-blind placebo-controlled trial. *Journal of the American Medical Association*. 1994;272(21):1661-1665.
92. Greenberg DP, Robertson CA, Landolfi VA, Bhaumik A, Senders SD, Decker MD. Safety and immunogenicity of an inactivated quadrivalent influenza vaccine in children 6 months through 8 years of age. *Pediatric infectious disease journal*. 2014;33(6):630-636.
93. Greenberg DP, Robertson CA, Noss MJ, Blatter MM, Biedenbender R, Decker MD. Safety and immunogenicity of a quadrivalent inactivated influenza vaccine compared to licensed trivalent inactivated influenza vaccines in adults. *Vaccine*. 2013;31(5):770-776.
94. Greenberg DP, Robertson CA, Talbot HK, Decker MD. Safety and immunogenicity of a quadrivalent influenza vaccine in adults 65 y of age and older. *Human vaccines and immunotherapeutics*. 2017;13(9):2058-2064.
95. Hakim H, Allison KJ, Van de Velde LA, et al. Immunogenicity and safety of high-dose trivalent inactivated influenza vaccine compared to standard-dose vaccine in children and young adults with cancer or HIV infection. *Vaccine*. Jun 8 2016;34(27):3141-3148.
96. Halasa N, Englund JA, Nachman S, et al. Safety of live attenuated influenza vaccine in mild to moderately immunocompromised children with cancer. *Vaccine*. May 31 2011;29(24):4110-4115.
97. Halasa NB, Savani BN, Asokan I, et al. Randomized Double-Blind Study of the Safety and Immunogenicity of Standard-Dose Trivalent Inactivated Influenza Vaccine versus High-Dose Trivalent Inactivated Influenza Vaccine in Adult Hematopoietic Stem Cell Transplantation Patients. *Biology of blood and marrow transplantation: journal of the American Society for Blood and Marrow Transplantation*. Mar 2016;22(3):528-535.
98. Hartvickson R, Cruz M, Ervin J, et al. Non-inferiority of mammalian cell-derived quadrivalent subunit influenza virus vaccines compared to trivalent subunit influenza virus vaccines in healthy children: a phase III randomized, multicenter, double-blind clinical trial.

99. Hoberman A, Greenberg DP, Paradise JL, et al. Effectiveness of inactivated influenza vaccine in preventing acute otitis media in young children: a randomized controlled trial. *Jama.* Sep 24 2003;290(12):1608-1616.
100. Hoft DF, Babusis E, Worku S, et al. Live and inactivated influenza vaccines induce similar humoral responses, but only live vaccines induce diverse T-cell responses in young children. *Journal of Infectious Diseases.* 2011;204(6):845-853.
101. Holland D, Booy R, Looze F, et al. Intradermal influenza vaccine administered using a new microinjection system produces superior immunogenicity in elderly adults: a randomized controlled trial. *Journal of infectious diseases.* 2008;198(5):650-658.
102. Hoon Han S, Hee Woo J, Weber F, Joo Kim W, Ran Peck K, Il Kim S. Immunogenicity and safety of Intanza (®)IDflu (®) intradermal influenza vaccine in South Korean adults: a multicenter, randomized trial. *Human vaccines.* 2013;9(9):1971-1977.
103. Hu Y, Shao M, Hu Y, Liang Q, Jia N, Chu K, et al. Immunogenicity and safety of an inactivated quadrivalent influenza vaccine: a randomized, double-blind, controlled phase III clinical trial in children aged 6-35 months in China. *Human vaccines & immunotherapeutics.* 2020;16(7):1691-8.
104. Hui SL, Chu LW, Peiris JSM, Chan KH, Chu D, Tsui W. Immune response to influenza vaccination in community-dwelling Chinese elderly persons. *Vaccine.* 2006;24(25):5371-5380.
105. Hung IF, Levin Y, To KK, Chan KH, Zhang AJ, Li P, et al. Dose sparing intradermal trivalent influenza (2010/2011) vaccination overcomes reduced immunogenicity of the 2009 H1N1 strain. *Vaccine.* 2012;30(45):6427-35.
106. Hurwitz ES, Haber M, Chang A, et al. Studies of the 1996-1997 inactivated influenza vaccine among children attending day care: immunologic response, protection against infection, and clinical effectiveness. *The Journal of infectious diseases.* Oct 2000;182(4):1218-1221.
107. Izikson R, Ibbitson EN, Adams D. Safety and Immunogenicity of Flublok, a Highly Purified Recombinant Recombinant Influenza Vaccine Made without Eggs or Live Influenza Viruses. *The Journal of Allergy and Clinical Immunology.* 2013;131,2.
108. Jackson LA, Gaglani MJ, Keyserling HL, et al. Safety, efficacy, and immunogenicity of an inactivated influenza vaccine in healthy adults: a randomized, placebo-controlled trial over two influenza seasons. *BMC infectious diseases.* Mar 17 2010;10:71.
109. Jamshed S, Walsh EE, Dimitroff LJ, Santelli JS, Falsey AR. Improved immunogenicity of high-dose influenza vaccine compared to standard-dose influenza vaccine in adult oncology patients younger than 65 years receiving chemotherapy: A pilot randomized clinical trial. *Vaccine.* 2016;34(5):630-5.
110. Jeffs LS, Peh CA, Jose MD, Lange K, Hurtado PR. Randomized trial investigating the safety and efficacy of influenza vaccination in patients with antineutrophil cytoplasmic antibody-associated vasculitis. *Nephrology (Carlton, Vic.).* May 2015;20(5):343-351.
111. Kanra G, Marchisio P, Feiterna-Sperling C, et al. Comparison of immunogenicity and tolerability of a virosome-adjuvanted and a split influenza vaccine in children. *The Pediatric infectious disease journal.* Apr 2004;23(4):300-306.
112. Keitel WA, Atmar RL, Cate TR, et al. Safety of high doses of influenza vaccine and effect on antibody responses in elderly persons. *Archives of internal medicine.* May 22 2006;166(10):1121-1127.
113. Keitel WA, Cate TR, Couch RB, Huggins LL, Hess KR. Efficacy of repeated annual immunization with inactivated influenza virus vaccines over a five-year period. *Vaccine.* Jul 1997;15(10):1114-1122.
114. Keitel WA, Treanor JJ, El Sahly HM, et al. Comparative immunogenicity of recombinant influenza hemagglutinin (rHA) and trivalent inactivated vaccine (TIV) among persons > or =65 years old. *Vaccine.* Dec 11 2009;28(2):379-385.
115. Khajedaluae M, Deldar K, Saedinejat S, Sasan MS. Benefit of inactivated influenza vaccine in infants in Iran: a community based randomized control trial. *Razavi international journal of medicine.* 2018;6(4).
116. Khan AS, Polezhaev F, Vasiljeva R, et al. Comparison of US inactivated split-virus and Russian live attenuated, cold-adapted trivalent influenza vaccines in Russian schoolchildren. *The Journal of infectious diseases.* Feb 1996;173(2):453-456.
117. Kieninger D, Sheldon E, Lin WY, et al. Immunogenicity, reactogenicity and safety of an inactivated quadrivalent influenza vaccine candidate versus inactivated trivalent influenza vaccine: A phase III, randomized trial in adults aged ≥18 years. *BMC Infectious Diseases.* 2013;13(1).
118. King JC, Jr., Treanor J, Fast PE, et al. Comparison of the safety, vaccine virus shedding, and immunogenicity of influenza virus vaccine, trivalent, types A and B, live cold-adapted, administered to human immunodeficiency virus (HIV)-infected and non-HIV-infected adults. *The Journal of infectious diseases.* Feb 2000;181(2):725-728.
119. King Jr JC, Lagos R, Bernstein DI, et al. Safety and immunogenicity of low and high doses of trivalent live cold- adapted influenza vaccine administered intranasally as drops or spray to healthy children. *Journal of Infectious Diseases.* 1998;177(5):1394-1397.
120. Kositanont U, Kanyok R, Wasi C, Wongsurakiat P, Suthamsmai T, Maranetra N. Occurrence and protective level of influenza infections using serology in patients with COPD in vaccination study. *Journal of the Medical Association of Thailand = Chotmaihet thangphaet.* Aug 2004;87(8):964-969.
121. Kumar D, Campbell P, Hoschler K, et al. Randomized Controlled Trial of Adjuvanted Versus Nonadjuvanted Influenza Vaccine in Kidney Transplant Recipients. *Transplantation.* Mar 2016;100(3):662-669.
122. Lan PT, Toan NT, Thang HA, Thang TC, Be LV, Thai DH, et al. A phase 2/3 double-blind, randomized, placebo-controlled study to evaluate the safety and immunogenicity of a seasonal trivalent inactivated split-virion influenza vaccine (IVACFLU-S) in healthy adults in Vietnam. *Human vaccines & immunotherapeutics.* 2019;15(12):2933-9.
123. Langley JM, Carmona Martinez A, Chatterjee A, et al. Immunogenicity and safety of an inactivated quadrivalent influenza vaccine candidate: a phase III randomized controlled trial in children. *The Journal of infectious diseases.* Aug 15 2013;208(4):544-553.

124. Langley JM, Wang L, Aggarwal N, et al. Immunogenicity and Reactogenicity of an Inactivated Quadrivalent Influenza Vaccine Administered Intramuscularly to Children 6 to 35 Months of Age in 2012-2013: A Randomized, Double-Blind, Controlled, Multicenter, Multicountry, Clinical Trial. *Journal of the Pediatric Infectious Diseases Society*. Sep 2015;4(3):242-251.
125. Leroux-Roels I, Vets E, Freese R, et al. Seasonal influenza vaccine delivered by intradermal microinjection: A randomised controlled safety and immunogenicity trial in adults. *Vaccine*. Dec 2 2008;26(51):6614-6619.
126. Leung DYM, Beck LA, Hanifin JM, et al. A randomized, multi-center, NIH/NIAID funded study to assess the immunogenicity of fluzone® intradermal and intramuscular vaccines in atopic dermatitis. *Journal of Allergy and Clinical Immunology*. 2014;133(2):AB72.
127. Levin MJ, Song LY, Fenton T, et al. Shedding of live vaccine virus, comparative safety, and influenza-specific antibody responses after administration of live attenuated and inactivated trivalent influenza vaccines to HIV-infected children. *Vaccine*. Aug 5 2008;26(33):4210-4217.
128. Levin Y, Kochba E, Shukarev G, Rusch S, Herrera-Taracena G, Damme P. A phase 1, open-label, randomized study to compare the immunogenicity and safety of different administration routes and doses of virosomal influenza vaccine in elderly. *Vaccine*. 2016;34(44):5262-5272.
129. Li R, Fang H, Li Y, Liu Y, Pellegrini M, Podda A. Safety and immunogenicity of an MF59-adjuvanted subunit influenza vaccine in elderly Chinese subjects. *Immunity & ageing :ageing: I & A*. Feb 20 2008;5:2.
130. Liebowitz D, Gottlieb K, Kolhatkar NS, Garg SJ, Asher JM, Nazareno J, et al. Efficacy, immunogenicity, and safety of an oral influenza vaccine: a placebo-controlled and active-controlled phase 2 human challenge study. *The Lancet Infectious diseases*. 2020;20(4):435-44.
131. Li-Kim-Moy JP, Yin JK, Heron L, et al. Influenza vaccine efficacy in young children attending childcare: a randomised controlled trial. *Journal of paediatrics and child health*. 2016;(no pagination).
132. Lum LC, Borja-Tabora CF, Breiman RF, et al. Influenza vaccine concurrently administered with a combination measles, mumps, and rubella vaccine to young children. *Vaccine*. Feb 10 2010;28(6):1566-1574.
133. Madhi SA, Cutland CL, Kuwanda L, et al. Influenza vaccination of pregnant women and protection of their infants. *New England journal of medicine*. 2014;371(10):918-931.
134. Madhi SA, Dittmer S, Kuwanda L, et al. Efficacy and immunogenicity of influenza vaccine in HIV-infected children: a randomized, double-blind, placebo-controlled trial. *AIDS (London, England)*. Jan 28 2013;27(3):369-379.
135. Madhi SA, Maskew M, Koen A, et al. Trivalent inactivated influenza vaccine in African adults infected with human immunodeficient virus: double blind, randomized clinical trial of efficacy, immunogenicity, and safety. *Clinical infectious diseases: an official publication of the Infectious Diseases Society of America*. Jan 1 2011;52(1):128-137.  
Madhi S, Cutland C, Hugo A, et al. Efficacy and immunogenicity of inactivated influenza vaccine in pregnant women: A randomized, double-blind, placebo-controlled trial. *International Journal of Infectious Diseases*. 2014; 21:430-431.  
Nunes MC, Cutland CL, Jones S, et al. Efficacy of Maternal Influenza Vaccination Against All-Cause Lower Respiratory Tract Infection Hospitalizations in Young Infants: Results from a Randomized Controlled Trial. *Clinical Infectious Diseases*. 2017;65(7):1066-1071.
136. Magnani G, Falchetti E, Pollini G, et al. Safety and efficacy of two types of influenza vaccination in heart transplant recipients: a prospective randomised controlled study. *The Journal of heart and lung transplantation: the official publication of the International Society for Heart Transplantation*. May 2005;24(5):588-592.
137. Mallory RM, Nyborg A, Kalyani RN, Yuan Y, Block SL, Dubovsky F. A study to evaluate the immunogenicity and shedding of live attenuated influenza vaccine strains in children 24-<48 months of age. *Vaccine*. 2020;38(5):1001-8.
138. Mallory RM, Yu J, Kameo S, Tanaka M, Rito K, Itoh Y, et al. The safety and efficacy of quadrivalent live attenuated influenza vaccine in Japanese children aged 2-18 years: Results of two phase 3 studies. *Influenza and other respiratory viruses*. 2018;12(4):438-45.
139. Marchisio P, Esposito S, Bianchini S, et al. Efficacy of injectable trivalent virosomal-adjuvanted inactivated influenza vaccine in preventing acute otitis media in children with recurrent complicated or noncomplicated acute otitis media. *The Pediatric infectious disease journal*. Oct 2009;28(10):855-859.
140. McBride WJH, Abhayaratna WP, Barr I, et al. Efficacy of a trivalent influenza vaccine against seasonal strains and against 2009 pandemic H1N1: a randomized, placebo-controlled trial. *Vaccine*. 2016;34(41):4991-4997.
141. McElhaney JE, Beran J, Devaster JM, et al. AS03-adjuvanted versus non-adjuvanted inactivated trivalent influenza vaccine against seasonal influenza in elderly people: a phase 3 randomised trial. *The lancet. Infectious diseases*. 2013;13(6):485-496.  
van Essen GA, Beran J, Devaster JM, et al. Influenza symptoms and their impact on elderly adults: randomised trial of AS03-adjuvanted or non-adjuvanted inactivated trivalent seasonal influenza vaccines. *Influenza and other respiratory viruses*. Jul 2014;8(4):452-462.
142. McKittrick N, Frank I, Jacobson JM, et al. Improved immunogenicity with high-dose seasonal influenza vaccine in hiv-infected persons. a single-center, parallel, randomized trial. *Annals of Internal Medicine*. 2013;158(1):19-26.
143. McManus M, Frangoul H, McCullers JA, Wang L, O'Shea A, Halasa N. Safety of high dose trivalent inactivated influenza vaccine in pediatric patients with acute lymphoblastic leukemia. *Pediatric blood & cancer*. 2014;61(5):815-820.
144. Mesa Duque SS, Pérez Moreno A, Hurtado G, Arbeláez Montoya MP. Effectiveness of an influenza vaccine in a working population in Colombia. *Revista panamericana de salud publica [Pan American journal of public health]*. 2001;10(4):232-239.
145. Minutello M, Senatore F, Cecchinelli G, et al. Safety and immunogenicity of an inactivated subunit influenza virus vaccine combined with MF59 adjuvant emulsion in elderly subjects, immunized for three consecutive influenza seasons. *Vaccine*. Jan 1999;17(2):99-104.
146. Mixeu MA, Vespa GN, Forleo-Neto E, Toniolo-Neto J, Alves PM. Impact of influenza vaccination on civilian aircrew illness and absenteeism. *Aviation, space, and environmental medicine*. Sep 2002;73(9):876-880.
147. Miyazaki C, Nakayama M, Tanaka Y, et al. Immunization of institutionalized asthmatic children and patients with psychomotor retardation using live attenuated cold-adapted reassortment influenza A H1N1, H3N2 and B vaccines. *Vaccine*. 1993;11(8):853-858.

148. Monto AS, Ohmit SE, Petrie JG, et al. Comparative efficacy of inactivated and live attenuated influenza vaccines. *New England journal of medicine*. 2009;361(13):1260-1267.
149. Morelon E, Pouteil Noble C, Daoud S, et al. Immunogenicity and safety of intradermal influenza vaccination in renal transplant patients who were non-responders to conventional influenza vaccination. *Vaccine*. 2010;28(42):6885-6890.
150. Musto P, Carotenuto M. Vaccination against influenza in multiple myeloma. *British journal of haematology*. May 1997;97(2):505-506.
151. Nace DA, Lin CJ, Ross TM, Saracco S, Churilla RM, Zimmerman RK. Randomized, controlled trial of high-dose influenza vaccine among frail residents of long-term care facilities. *Journal of infectious diseases*. 2015;211(12):1915-1924.
152. Natori Y, Humar A, Lipton J, et al. A pilot randomized trial of adjuvanted influenza vaccine in adult allogeneic hematopoietic stem cell transplant recipients. *Bone marrow transplantation*. 2017;52(7):1016-1021.
153. Natori Y, Shiotsuka M, Slomovic J, et al. A Double-Blind, Randomized Trial of High-Dose vs Standard-Dose Influenza Vaccine in Adult Solid-Organ Transplant Recipients. *Clinical infectious diseases : an official publication of the Infectious Diseases Society of America*. May 17 2018;66(11):1698-1704.
154. Nichol KL, Lind A, Margolis KL, et al. The effectiveness of vaccination against influenza in healthy, working adults. *The New England journal of medicine*. Oct 5 1995;333(14):889-893.
155. Nichol KL, Mendelman PM, Mallon KP, et al. Effectiveness of live, attenuated intranasal influenza virus vaccine in healthy, working adults: a randomized controlled trial. *Jama*. Jul 14 1999;282(2):137-144.
156. Noh JY, Jang YS, Lee SN, Choi MJ, Yoon JG, Yu DH, et al. Randomized, single-blind, active-controlled phase I clinical trial to evaluate the immunogenicity and safety of GC3114 (high-dose, quadrivalent influenza vaccine) in healthy adults. *Vaccine*. 2019;37(36):5171-6.
157. Nolan T, Bravo L, Ceballos A, et al. Enhanced and persistent antibody response against homologous and heterologous strains elicited by a MF59-adjuvanted influenza vaccine in infants and young children. *Vaccine*. 2014;32(46):6146-6156.
158. Ohmit SE, Victor JC, Rotthoff JR, et al. Prevention of antigenically drifted influenza by inactivated and live attenuated vaccines. *New England journal of medicine*. 2006;355(24):2513-2522.
159. Ohmit SE, Victor JC, Teich ER, et al. Prevention of symptomatic seasonal influenza in 2005-2006 by inactivated and live attenuated vaccines. *Journal of infectious diseases*. 2008;198(3):312-317.
160. Ortiz JR, Goswami D, Lewis KDC, et al. Safety of Russian-backbone seasonal trivalent, live-attenuated influenza vaccine in a phase II randomized placebo-controlled clinical trial among children in urban Bangladesh. *Vaccine*. 2015;33(29):3415-3421.
161. Pedroza A, Huerta JG, de la Luz Garcia M, et al. The safety and immunogenicity of influenza vaccine in children with asthma in Mexico. *International Journal of Infectious Diseases*. 2009;13(4):469-475.
162. Pepin S, Donazzolo Y, Jambrecina A, Salamand C, Saville M. Safety and immunogenicity of a quadrivalent inactivated influenza vaccine in adults. *Vaccine*. Nov 12 2013;31(47):5572-5578.
163. Pepin S, Dupuy M, Borja-Tabora CFC, Montellano M, Bravo L, Santos J, et al. Efficacy, immunogenicity, and safety of a quadrivalent inactivated influenza vaccine in children aged 6-35 months: A multi-season randomised placebo-controlled trial in the Northern and Southern Hemispheres. *Vaccine*. 2019;37(13):1876-84.  
Pepin S, Samson SI, Alvarez FP, Dupuy M, Gresset-Bourgeois V, De Bruijn I. Impact of a quadrivalent inactivated influenza vaccine on influenza-associated complications and health care use in children aged 6 to 35 months: Analysis of data from a phase III trial in the Northern and Southern Hemispheres. *Vaccine*. 2019;37(13):1885-8.
164. Pepin S, Szymanski H, Rochin Kobashi IA, et al. Safety and immunogenicity of an intramuscular quadrivalent influenza vaccine in children 3 to 8 y of age: A phase III randomized controlled study. *Human vaccines & immunotherapeutics*. Dec 2016;12(12):3072-3078.
165. Powers DC, Smith GE, Anderson EL, et al. Influenza A virus vaccines containing purified recombinant H3 hemagglutinin are well tolerated and induce protective immune responses in healthy adults. *The Journal of infectious diseases*. Jun 1995;171(6):1595-1599.
166. Pregliasco F, Mensi C, Serpilli W, Speccher L, Masella P, Belloni A. Immunogenicity and safety of three commercial influenza vaccines in institutionalized elderly. *Aging (Milan, Italy)*. Feb 2001;13(1):38-43.
167. Principi N, Esposito S, Marchisio P, Gasparini R, Crovari P. Socioeconomic impact of influenza on healthy children and their families. *The Pediatric infectious disease journal*. Oct 2003;22(10 Suppl):S207-210.
168. Redding G, Walker RE, Hessel C, et al. Safety and tolerability of cold-adapted influenza virus vaccine in children and adolescents with asthma. *The Pediatric infectious disease journal*. Jan 2002;21(1):44-48.
169. Reid DW, Bromly CL, Stenton SC, Hendrick DJ, Bourke SJ. A double-blind placebo-controlled study of the effect of influenza vaccination on airway responsiveness in asthma. *Respiratory medicine*. Aug 1998;92(8):1010-1011.
170. Rodriguez Weber MA, Claeys C, Aranza Doniz C, et al. Immunogenicity and safety of inactivated quadrivalent and trivalent influenza vaccines in children 18-47 months of age. *The Pediatric infectious disease journal*. Dec 2014;33(12):1262-1269.
171. Rolfes MA, Goswami D, Sharmeen AT, et al. Efficacy of trivalent influenza vaccine against laboratory-confirmed influenza among young children in a randomized trial in Bangladesh. *Vaccine*. 2017;35(50):6967-6976.
172. Rouphael NG, Paine M, Mosley R, et al. The safety, immunogenicity, and acceptability of inactivated influenza vaccine delivered by microneedle patch (TIV-MNP 2015): a randomised, partly blinded, placebo-controlled, phase 1 trial. *The Lancet*. 2017;390(10095):649-658.
173. Rudenko LG, Arden NH, Grigorieva E, et al. Immunogenicity and efficacy of Russian live attenuated and US inactivated influenza vaccines used alone and in combination in nursing home residents. *Vaccine*. 2000;19(2-3):308-318.
174. Ruf BR, Colberg K, Frick M, Preusche A. Open, randomized study to compare the immunogenicity and reactogenicity of an influenza split vaccine with an MF59-adjuvanted subunit vaccine and a virosome-based subunit vaccine in elderly. *Infection*. 2004;32(4):191-198.

175. Safdar A, Rodriguez MA, Fayad LE, et al. Dose-related safety and immunogenicity of baculovirus-expressed trivalent influenza vaccine: A double-blind, controlled trial in adult patients with non-Hodgkin B cell lymphoma. *Journal of Infectious Diseases*. 2006;194(10):1394-1397.
176. Sarkar S, Bokade C, Garg K, Kumar R, Sanmukhani J, Mittal R. Immunogenicity and safety of the first indigenously developed Indian tetravalent influenza vaccine (split virion) in healthy children (6 months to 17 years of age): a randomized, multicenter, phase III clinical trial. *Human vaccines & immunotherapeutics*. 2020:1-9.
177. Sarsenbayeva G, Volgin Y, Kassenov M, et al. Safety and immunogenicity of the novel seasonal preservative- and adjuvant-free influenza vaccine: blind, randomized, and placebo-controlled trial. *Journal of medical virology*. 2017;(no pagination).
178. Saxén H, Virtanen M. Randomized, placebo-controlled double blind study on the efficacy of influenza immunization on absenteeism of health care workers. *Pediatric infectious disease journal*. 1999;18(9):779-783.
179. Schaad UB, Buehlmann U, Burger R, et al. Comparison of immunogenicity and safety of a virosome and a subunit influenza vaccine in pediatric cystic fibrosis (CF) patients: a Swiss multicenter study. *37th interscience conference on antimicrobial agents and chemotherapy; 1997 sept 28 - oct 1*. 1997:238.
180. Scheifele DW, McNeil SA, Ward BJ, et al. Safety, immunogenicity, and tolerability of three influenza vaccines in older adults: results of a randomized, controlled comparison. *Human vaccines & immunotherapeutics*. Nov 2013;9(11):2460-2473.
181. Seo YB, Lee J, Song JY, Choi HJ, Cheong HJ, Kim WJ. Safety and immunogenicity of influenza vaccine among HIV-infected adults: Conventional vaccine vs. intradermal vaccine. *Human vaccines & immunotherapeutics*. 2016;12(2):478-84.
182. Seo YB, Choi WS, Lee J, Song JY, Cheong HJ, Kim WJ. Comparison of the immunogenicity and safety of the conventional subunit, MF59-adjuvanted, and intradermal influenza vaccines in the elderly. *Clinical and vaccine immunology*. 2014;21(7):989-996.
183. Sesay S, Brzostek J, Meyer I, et al. Safety, immunogenicity, and lot-to-lot consistency of a split-virion quadrivalent influenza vaccine in younger and older adults: a phase III randomized, double-blind clinical trial. *Human vaccines and immunotherapeutics*. 20172018;14(3):596-608:1-13.
184. Sharma S, Singh VB, Kumar S, Prajapati V, Patel J, Vukkala R, et al. Immunogenicity and safety of the first indigenously developed Indian tetravalent influenza vaccine (split virion) in healthy adults  $\geq 18$  years of age: A randomized, multicenter, phase II / III clinical trial. *Human vaccines & immunotherapeutics*. 2018;14(6):1362-9.
185. Sheldon EA, Jeanfreau R, Sliman JA, et al. Immunogenicity of a quadrivalent Ann Arbor strain live attenuated influenza vaccine delivered using a blow-fill-seal device in adults: a randomized, active-controlled study\*. *Influenza and other respiratory viruses*. 2013;7(6):1142-1150.
186. Sindoni D, La Fauci V, Squeri R, Cannavò G, Bacilieri S, Panatto D, et al. Comparison between a conventional subunit vaccine and the MF59-adjuvanted subunit influenza vaccine in the elderly: an evaluation of the safety, tolerability and immunogenicity. *Journal of preventive medicine and hygiene*. 2009;50(2):121-6.
187. Sleight KM, Danforth DG, Hall RT, Fleming JA, Stiver HG. Double-blind, randomized study of the effects of influenza vaccination on the specific antibody response and clinical course of patients with chronic fatigue syndrome. *Journal canadien des maladies infectieuses [canadian journal of infectious diseases]*. 2000;11(5):267-273.
188. Solares AR, Solares AR, Aragon CG, et al. Safety and immunogenicity profiles of an adjuvanted seasonal influenza vaccine in Guatemalan children. *Journal of Infection in Developing Countries*. 2014;8(9):1160-1168.
189. Song JY, Cheong HJ, Ha SH, Hwang IS, Kee SY, Jeong HW, et al. Clinical impact of influenza immunization in patients with liver cirrhosis. *Journal of clinical virology: the official publication of the Pan American Society for Clinical Virology*. 2007;39(3):159-63.
190. Song JY, Lee J, Woo HJ, Wie SH, Lee JS, Kim SW, et al. Immunogenicity and safety of an egg-based inactivated quadrivalent influenza vaccine (GC3110A) versus two inactivated trivalent influenza vaccines with alternate B strains: A phase III randomized clinical trial in adults. *Human vaccines & immunotherapeutics*. 2019;15(3):710-6.
191. Souza AR, Braga JAP, de Paiva TM, Loggetto SR, Azevedo RS, Weckx LY. Immunogenicity and tolerability of a virosome influenza vaccine compared to split influenza vaccine in patients with sickle cell anemia. *Vaccine*. 2010;28(4):1117-1120.
192. Squarcione S, Sgricia S, Biasio LR, Perinetti E. Comparison of the reactogenicity and immunogenicity of a split and a subunit-adjuvanted influenza vaccine in elderly subjects. *Vaccine*. 2003;21(11-12):1268-74.
193. Stapleton JT, Wagner N, Tuetken R, Bellamy AR, Hill H, Kim S, et al. High dose trivalent influenza vaccine compared to standard dose vaccine in patients with rheumatoid arthritis receiving TNF-alpha inhibitor therapy and healthy controls: Results of the DMID 10-0076 randomized clinical trial. *Vaccine*. 2020;38(23):3934-41.
194. Steinhoff MC, Katz J, Englund JA, et al. Year-round influenza immunisation during pregnancy in Nepal: a phase 4, randomised, placebo-controlled trial. *The lancet. Infectious diseases*. 2017;17(9):981-989.  
Kozuki N, Katz J, Englund JA, et al. Impact of maternal vaccination timing and influenza virus circulation on birth outcomes in rural Nepal. *International journal of gynaecology and obstetrics*. 2017;(no pagination).  
Tielsch JM, Steinhoff M, Katz J, et al. Designs of two randomized, community-based trials to assess the impact of influenza immunization during pregnancy on respiratory illness among pregnant women and their infants and reproductive outcomes in rural Nepal. *BMC pregnancy and childbirth*. 2015; 15:40.
195. Stevanovic G, Lavadinovic L, Filipovic Vignjevic S, et al. Safety and immunogenicity of a seasonal trivalent inactivated split influenza vaccine: a phase I randomized clinical trial in healthy Serbian adults. *Human vaccines & immunotherapeutics*. Mar 4 2018;14(3):579-586.
196. Stevanovic G, Obradovic A, Ristic S, Petrovic D, Milenkovic B, Mitrovic D, et al. Safety and immunogenicity of a seasonal trivalent inactivated split influenza vaccine: a double blind, phase III randomized clinical trial in healthy Serbian adults. *Therapeutic advances in vaccines and immunotherapy*. 2020;8.
197. Strijbos E, Tannemaat MR, Alleman I, de Meel RHP, Bakker JA, van Beek R, et al. A prospective, double-blind, randomized, placebo-controlled study on the efficacy and safety of influenza vaccination in myasthenia gravis. *Vaccine*. 2019;37(7):919-25.



198. Swierkosz EM, Newman FK, Anderson EL, Nugent SL, Mills GB, Belshe RB. Multidose, live attenuated, cold-recombinant, trivalent influenza vaccine in infants and young children. *Journal of infectious diseases*. 1994;169(5):1121-1124.
199. Tam JS, Capeding MRZ, Lum LCS, et al. Efficacy and safety of a live attenuated, cold-adapted influenza vaccine, trivalent against culture-confirmed influenza in young children in Asia. *Pediatric Infectious Disease Journal*. 2007;26(7):619-628.
200. Tanaka Y, Ueda K, Miyazaki C, et al. Trivalent cold recombinant influenza live vaccine in institutionalized children with bronchial asthma and patients with psychomotor retardation. *Pediatric Infectious Disease Journal*. 1993;12(7):600-605.
201. Tapia MD, Sow SO, Tamboura B, Tégueté I, Pasetti MF, Kodio M, et al. Maternal immunisation with trivalent inactivated influenza vaccine for prevention of influenza in infants in Mali: a prospective, active-controlled, observer-blind, randomised phase 4 trial. *The Lancet Infectious diseases*. 2016;16(9):1026-35.
202. Tasker SA, Treanor JJ, Paxton WB, Wallace MR. Efficacy of influenza vaccination in HIV-infected persons. A randomized, double-blind, placebo-controlled trial. *Annals of internal medicine*. 1999;131(6):430-433.
203. Tinoco JC, Pavia-Ruz N, Cruz-Valdez A, et al. Immunogenicity, reactogenicity, and safety of inactivated quadrivalent influenza vaccine candidate versus inactivated trivalent influenza vaccine in healthy adults aged ≥18 years: a phase III, randomized trial. *Vaccine*. 2014;32(13):1480-1487.
204. Treanor J, Dumyati G, O'Brien D, et al. Evaluation of cold-adapted, reassortant influenza B virus vaccines in elderly and chronically ill adults. *Journal of infectious diseases*. 1994;169(2):402-407.
205. Treanor JJ, Campbell JD, Brady RC, et al. Rapid licensure of a new, inactivated influenza vaccine in the United States. *Human vaccines*. 2005;1(6):239-244.
206. Treanor JJ, El Sahly H, King J, et al. Protective efficacy of a trivalent recombinant hemagglutinin protein vaccine (FluBlok(R)) against influenza in healthy adults: a randomized, placebo-controlled trial. *Vaccine*. Oct 13 2011;29(44):7733-7739.
207. Treanor JJ, Kotloff K, Betts RF, et al. Evaluation of trivalent, live, cold-adapted (CAIV-T) and inactivated (TIV) influenza vaccines in prevention of virus infection and illness following challenge of adults with wild-type influenza A (H1N1), A (H3N2), and B viruses. *Vaccine*. 1999;18(9-10):899-906.
208. Treanor JJ, Schiff GM, Hayden FG, et al. Safety and immunogenicity of a baculovirus-expressed hemagglutinin influenza vaccine: a randomized controlled trial. *Jama*. 2007;297(14):1577-1582.
209. Treanor JT, Albano FR, Sawlwin DC, et al. Immunogenicity and safety of a quadrivalent inactivated influenza vaccine compared with two trivalent inactivated influenza vaccines containing alternate B strains in adults: a phase 3, randomized noninferiority study. *Vaccine*. 2017;35(15):1856-1864.
210. Tsang P, Gorse GJ, Strout CB, et al. Immunogenicity and safety of Fluzone intradermal and high-dose influenza vaccines in older adults >65 years of age: a randomized, controlled, phase II trial. *Vaccine*. 2014;32(21):2507-2517.
211. Van Damme P, Arnou R, Kafaja F, et al. Evaluation of non-inferiority of intradermal versus adjuvanted seasonal influenza vaccine using two serological techniques: A randomised comparative study. *BMC Infectious Diseases*. 2009;10:134.
212. van de Witte S, Nauta J, Montomoli E, Weckx J. A Phase III randomised trial of the immunogenicity and safety of quadrivalent versus trivalent inactivated subunit influenza vaccine in adult and elderly subjects, assessing both anti-haemagglutinin and virus neutralisation antibody responses. *Vaccine*. 2018;36(40):6030-8.
213. Vardeny O, Kim K, Udell JA, Joseph J, Desai AS, Farkouh ME, et al. Effect of High-Dose Trivalent vs Standard-Dose Quadrivalent Influenza Vaccine on Mortality or Cardiopulmonary Hospitalization in Patients With High-risk Cardiovascular Disease: A Randomized Clinical Trial. *Jama*. 2020.
214. Vesikari T, Fleming DM, Aristegui JF, et al. Safety, efficacy, and effectiveness of cold-adapted influenza vaccine-trivalent against community-acquired, culture-confirmed influenza in young children attending day care. *Pediatrics*. Dec 2006;118(6):2298-2312.
215. Vesikari T, Karvonen A, Korhonen T, et al. A randomized, double-blind study of the safety, transmissibility and phenotypic and genotypic stability of cold-adapted influenza virus vaccine. *The Pediatric infectious disease journal*. Jul 2006;25(7):590-595.
216. Vesikari T, Karvonen A, Smith HM, et al. Safety and tolerability of cold-adapted influenza vaccine, trivalent, in infants younger than 6 months of Age. *Pediatrics*. 2008;121(3):e568-e573.
217. Vesikari T, Knuf M, Wutzler P, et al. Oil-in-water emulsion adjuvant with influenza vaccine in young children. *The New England journal of medicine*. Oct 13 2011;365(15):1406-1416.
218. Vesikari T, Nauta J, Lapini G, Montomoli E, van de Witte S. Immunogenicity and safety of quadrivalent versus trivalent inactivated subunit influenza vaccine in children and adolescents: A phase III randomized study. *International journal of infectious diseases: IJID : official publication of the International Society for Infectious Diseases*. 2020;92:29-37.
219. Vesikari T, Pellegrini M, Karvonen A, et al. Enhanced immunogenicity of seasonal influenza vaccines in young children using MF59 adjuvant. *Pediatric Infectious Disease Journal*. 2009;28(7):563-571.
220. Vesikari T, Virta M, Heinonen S, Eymin C, Lavis N, Chabanon AL, et al. Immunogenicity and safety of a quadrivalent inactivated influenza vaccine in pregnant women: a randomized, observer-blind trial. *Human Vaccines and Immunotherapeutics*. 2020;16(3):623-9.
221. Victor JC, Lewis KD, Diallo A, et al. Efficacy of a Russian-backbone live attenuated influenza vaccine among children in Senegal: a randomised, double-blind, placebo-controlled trial. *The Lancet. Global health*. Dec 2016;4(12):e955-e965.
222. Volling C, Coleman BL, Katz K, Simor AE, Muller M, Powis J, et al. Immunogenicity and reactogenicity of high- vs. standard-dose trivalent inactivated influenza vaccine in healthcare workers: a pilot randomized controlled trial. *Clinical microbiology and infection: the official publication of the European Society of Clinical Microbiology and Infectious Diseases*. 2019;25(2):217-24.
223. Wang L, Chandrasekaran V, Domachowske JB, Li P, Innis BL, Jain VK. Immunogenicity and Safety of an Inactivated Quadrivalent Influenza Vaccine in US Children 6-35 Months of Age During 2013-2014: Results From A Phase II Randomized Trial. *Journal of the Pediatric Infectious Diseases Society*. Jun 2016;5(2):170-179.

224. Wang S, Liu S, Chu K, et al. Immunogenicity and safety of an inactivated quadrivalent influenza vaccine candidate versus inactivated trivalent influenza vaccines in participants  $\geq 3$  years of age: a double-blind, randomized, parallel-controlled phase III clinical trial in China. *Expert review of vaccines*. 2017;1-15.
225. Wang S, Zheng Y, Jin X, Gan Z, Shao Y, Zhu C, et al. Efficacy and safety of a live attenuated influenza vaccine in Chinese healthy children aged 3–17 years in one study center of a randomized, double-blind, placebo-controlled phase 3 clinical trial, 2016/17 season. *Vaccine*. 2020.
226. Ward BJ, Makarkov A, Séguin A, Pillet S, Trépanier S, Dhaliwall J, et al. Efficacy, immunogenicity, and safety of a plant-derived, quadrivalent, virus-like particle influenza vaccine in adults (18-64 years) and older adults ( $\geq 65$  years): two multicentre, randomised phase 3 trials. *Lancet* (London, England). 2020.
227. Weingarten S, Staniloff H, Ault M, Miles P, Bamberger M, Meyer RD. Do hospital employees benefit from the influenza vaccine? A placebo-controlled clinical trial. *Journal of general internal medicine*. 1988;3(1):32-7.
228. Wilde JA, McMillan JA, Serwint J, Butta J, O'Riordan MA, Steinhoff MC. Effectiveness of influenza vaccine in health care professionals: a randomized trial. *Jama*. 1999;281(10):908-13.
229. Wongsurakiat P, Maranetra KN, Wasi C, Kositanont U, Dejsomritrutai W, Charoenratanakul S. Acute respiratory illness in patients with COPD and the effectiveness of influenza vaccination: a randomized controlled study. *Chest*. Jun 2004;125(6):2011-2020.  
Wongsurakiat P, Maranetra KN, Gulprasutdilog P, et al. Adverse effects associated with influenza vaccination in patients with COPD: a randomized controlled study. *Respirology (Carlton, Vic.)*. Nov 2004;9(4):550-556.
230. Zaman K, Roy E, Arifeen SE, Rahman M, Raqib R, Wilson E, et al. Effectiveness of maternal influenza immunization in mothers and infants. *The New England journal of medicine*. 2008;359(15):1555-64.
231. Zedda L, Forleo-Neto E, Vertruyen A, et al. Dissecting the immune response to MF59-adjuvanted and nonadjuvanted seasonal influenza vaccines in children less than three years of age. *The Pediatric infectious disease journal*. Jan 2015;34(1):73-78.

### Characteristics of included studies

| REF                                                  | AUTHOR   | YEAR | INTERVENTIONS                                      | N. PATIENTS RANDOMISED | AGE                | COMORBIDITY/<br>SPECIAL GROUPS | SETTING     | FUNDING SOURCE                | CONTINENT | COUNTRY                           | CENTER        |
|------------------------------------------------------|----------|------|----------------------------------------------------|------------------------|--------------------|--------------------------------|-------------|-------------------------------|-----------|-----------------------------------|---------------|
| <b>STUDIES INCLUDED IN THE NETWORK META-ANALYSES</b> |          |      |                                                    |                        |                    |                                |             |                               |           |                                   |               |
| 1                                                    | Abadoglu | 2004 | trivalent inactivated IM                           | 86                     | 18 -60 years       | chronic respiratory disease    | outpatients | not reported                  | Asia      | Turkey                            | not reported  |
|                                                      |          |      | no vaccine                                         | 42                     |                    |                                |             |                               |           |                                   |               |
| 3                                                    | Anh      | 2016 | trivalent inactivated IM                           | 30                     | 18 -60 years       | healthy subjects               | outpatients | government/ private no profit | Asia      | Vietnam                           | single center |
|                                                      |          |      | placebo                                            | 30                     |                    |                                |             |                               |           |                                   |               |
| 2                                                    | Allsup   | 2004 | trivalent inactivated IM                           | 552                    | 61 years and older | healthy subjects               | outpatients | government/ private no profit | Europe    | UK                                | no reported   |
|                                                      |          |      | placebo                                            | 177                    |                    |                                |             |                               |           |                                   |               |
| 5                                                    | Ansaldi  | 2012 | trivalent inactivated IM                           | 26                     | 18 -60 years       | imunodepression (any cause)    | outpatients | not reported                  | Europe    | Italy                             | not reported  |
|                                                      |          |      | trivalent inactivated intradermal                  | 28                     |                    |                                |             |                               |           |                                   |               |
| 4                                                    | Ansaldi  | 2013 | trivalent inactivated intradermal                  | 250                    | 61 years and older | healthy subjects               | outpatients | not reported                  | Europe    | Italy                             | multi-center  |
|                                                      |          |      | trivalent inactivated adjuvanted virosome/liposome | 250                    |                    |                                |             |                               |           |                                   |               |
| 6                                                    | Arnou    | 2010 | trivalent inactivated intradermal                  | 1803                   | 18 -60 years       | healthy subjects               | outpatients | industry                      | Europe    | France, Italy, Belgium, Lithuania | multi-center  |
|                                                      |          |      | trivalent inactivated IM                           | 452                    |                    |                                |             |                               |           |                                   |               |

|    |            |      |                                               |      |                    |                             |             |                               |                 |                                                                                          |              |
|----|------------|------|-----------------------------------------------|------|--------------------|-----------------------------|-------------|-------------------------------|-----------------|------------------------------------------------------------------------------------------|--------------|
| 7  | Arnou      | 2009 | trivalent inactivated IM                      | 1089 | 61 years and older | healthy subjects            | outpatients | industry                      | Europe          | France, Italy, Belgium, Lithuania                                                        | multi-center |
|    |            |      | trivalent inactivated intradermal             | 2618 |                    |                             |             |                               |                 |                                                                                          |              |
| 8  | Ashkenazi  | 2006 | trivalent live attenuated nasal spray         | 1101 | <5 years           | chronic respiratory disease | outpatients | not reported                  | Multi-Continent | Belgium, Czech Republic, Finland, Germany, Italy, Poland, Spain, Switzerland, UK, Israel | multi-center |
|    |            |      | trivalent inactivated (subunit or split) IM   | 1086 |                    |                             |             |                               |                 |                                                                                          |              |
| 9  | Auewarakul | 2006 | trivalent inactivated intradermal             | 400  | 18 -60 years       | healthy subjects            | outpatients | not reported                  | Asia            | Thailand                                                                                 | not reported |
|    |            |      | trivalent inactivated IM                      | 100  |                    |                             |             |                               |                 |                                                                                          |              |
| 10 | Baldo      | 2007 | trivalent inactivated adjuvanted MF59/AS03 IM | 128  | 18 -60 years       | multicomorbidity            | outpatients | government/ private no profit | Europe          | Italy                                                                                    | not reported |
|    |            |      | trivalent inactivated IM                      | 128  |                    |                             |             |                               |                 |                                                                                          |              |
| 11 | Baluch     | 2013 | trivalent inactivated) intradermal            | 114  | 18 -60 years       | imunodepression (any cause) | outpatients | industry                      | North America   | Canada                                                                                   | not reported |
|    |            |      | trivalent inactivated IM                      | 115  |                    |                             |             |                               |                 |                                                                                          |              |
| 12 | Barrett    | 2011 | trivalent inactivated IM                      | 3626 | 18 -60 years       | healthy subjects            | outpatients | government/ private no profit | North America   | Usa                                                                                      | multi-center |
|    |            |      | placebo                                       | 3624 |                    |                             |             |                               |                 |                                                                                          |              |

|    |          |      |                                                                  |      |                     |                  |             |                               |               |     |               |
|----|----------|------|------------------------------------------------------------------|------|---------------------|------------------|-------------|-------------------------------|---------------|-----|---------------|
| 13 | Bart     | 2016 | quadrivalent inactivated IM                                      | 1335 | 18 -60 years        | healthy subjects | outpatients | industry                      | North America | Usa | multi-center  |
|    |          |      | trivalent inactivated IM                                         | 1345 |                     |                  |             |                               |               |     |               |
| 14 | Baxter   | 2011 | trivalent inactivated recombinant                                | 300  | 18 -60 years        | healthy subjects | outpatients | not reported                  | North America | Usa | multi-center  |
|    |          |      | trivalent inactivated IM                                         | 302  |                     |                  |             |                               |               |     |               |
| 15 | Belongia | 2020 | trivalent inactivated high doses (subunit or split) IM           | 29   | 61 years and older  | healthy subjects | outpatients | government/ private no profit | North America | Usa | single center |
|    |          |      | trivalent inactivated adjuvanted (subunit or split) MF59/AS03 IM | 30   |                     |                  |             |                               |               |     |               |
|    |          |      | quadrivalent inactivated recombinant                             | 30   |                     |                  |             |                               |               |     |               |
| 20 | Belshe   | 1992 | trivalent live attenuated nasal spray                            | 32   | mixed aged children | healthy subjects | outpatients | not reported                  | North America | Usa | not reported  |
|    |          |      | placebo                                                          | 17   |                     |                  |             |                               |               |     |               |
| 18 | Belshe   | 1998 | trivalent live attenuated nasal spray                            | 1070 | <5 years            | healthy subjects | outpatients | government/ private no profit | North America | Usa | multi-center  |
|    |          |      | placebo                                                          | 532  |                     |                  |             |                               |               |     |               |
| 17 | Belshe   | 2000 | trivalent live attenuated nasal spray                            | 917  | <5 years            | healthy subjects | outpatients | government/ private no profit | North America | Usa | multi-center  |
|    |          |      | placebo                                                          | 441  |                     |                  |             |                               |               |     |               |

|    |              |      |                                                    |      |              |                  |                            |                               |                 |                                                                                        |               |
|----|--------------|------|----------------------------------------------------|------|--------------|------------------|----------------------------|-------------------------------|-----------------|----------------------------------------------------------------------------------------|---------------|
| 16 | Belshe       | 2007 | trivalent live attenuated nasal spray              | 4179 | <5 years     | healthy subjects | outpatients                | not reported                  | Multi-Continent | USA (49% Of Subjects), Europe And Middle East (45% Of Subjects), Asia (6% Of Subjects) | multi-center  |
|    |              |      | trivalent inactivated IM                           | 4173 |              |                  |                            |                               |                 |                                                                                        |               |
| 19 | Belshe b     | 2007 | trivalent inactivated intradermal                  | 30   | 18 -60 years | healthy subjects | outpatients                | government/ private no profit | North America   | Usa                                                                                    | single center |
|    |              |      | trivalent inactivated IM                           | 31   |              |                  |                            |                               |                 |                                                                                        |               |
| 21 | Ben-Yehuda   | 2003 | trivalent inactivated IM                           | 33   | ≥61 years    | multicomorbidity | long- term care facilities | government/ private no profit | Asia            | Israel                                                                                 | not reported  |
|    |              |      | trivalent inactivated adjuvanted virosome/liposome | 48   |              |                  |                            |                               |                 |                                                                                        |               |
| 22 | Ben-Yehuda b | 2003 | trivalent inactivated IM                           | 37   | 18 -60 years | healthy subjects | outpatients                | not reported                  | Asia            | Israel                                                                                 | not reported  |
|    |              |      | trivalent inactivated adjuvanted virosome/liposome | 36   |              |                  |                            |                               |                 |                                                                                        |               |
| 26 | Beran        | 2009 | trivalent inactivated IM                           | 4137 | 18 -60 years | healthy subjects | outpatients                | industry                      | Europe          | Czech Republic                                                                         | not reported  |
|    |              |      | placebo                                            | 2066 |              |                  |                            |                               |                 |                                                                                        |               |

|    |                  |      |                                                      |      |              |                  |             |              |               |                                    |               |
|----|------------------|------|------------------------------------------------------|------|--------------|------------------|-------------|--------------|---------------|------------------------------------|---------------|
| 24 | Beran a          | 2013 | trivalent inactivated IM                             | 105  | 18 -60 years | healthy subjects | outpatients | industry     | Europe        | Czech Republic                     | single center |
|    |                  |      | trivalent inactivated adjuvanted MF59/AS03 IM        | 105  |              |                  |             |              |               |                                    |               |
|    |                  |      | quadrivalent inactivated IM                          | 105  |              |                  |             |              |               |                                    |               |
|    |                  |      | quadrivalent inactivated adjuvanted MF59/AS03        | 105  |              |                  |             |              |               |                                    |               |
| 25 | Beran b          | 2009 | trivalent inactivated IM                             | 5103 | 18 -60 years | healthy subjects | outpatients | industry     | Europe        | Czech Republic, Finland            | multi-center  |
|    |                  |      | placebo                                              | 2549 |              |                  |             |              |               |                                    |               |
| 23 | Beran c cohort 1 | 2009 | trivalent inactivated IM                             | 547  | 18 -60 years | healthy subjects | outpatients | industry     | Europe        | Belgium, Czech Republic, Lithuania | multi-center  |
|    |                  |      | trivalent inactivated intradermal                    | 544  |              |                  |             |              |               |                                    |               |
|    | Beran c cohort 2 |      | trivalent inactivated IM                             | 410  |              |                  |             |              |               |                                    |               |
|    |                  |      | trivalent inactivated (subunit or split) intradermal | 418  |              |                  |             |              |               |                                    |               |
| 27 | Bergen           | 2004 | trivalent live attenuated nasal spray                | 6473 | 18 -60 years | healthy subjects | outpatients | not reported | Not Reported  | Not Reported                       | not reported  |
|    |                  |      | placebo                                              | 3216 |              |                  |             |              |               |                                    |               |
| 28 | Block            | 2012 | quadrivalent inactivated IM                          | 1385 | 18 -60 years | healthy subjects | outpatients | industry     | North America | USA                                | multi-center  |
|    |                  |      | trivalent inactivated IM                             | 927  |              |                  |             |              |               |                                    |               |

|    |                      |      |                                             |      |              |                  |             |                               |                 |                                 |              |
|----|----------------------|------|---------------------------------------------|------|--------------|------------------|-------------|-------------------------------|-----------------|---------------------------------|--------------|
| 29 | Block                | 2011 | quadrivalent inactivated IM                 | 1200 | 18 -60 years | healthy subjects | outpatients | industry                      | North America   | USA                             | multi center |
|    |                      |      | T/LAIV-B/Yamagata                           | 299  |              |                  |             |                               |                 |                                 |              |
|    |                      |      | T/LAIV-B/Victoria                           | 301  |              |                  |             |                               |                 |                                 |              |
| 30 | Boonnak              | 2017 | trivalent inactivated IM                    | 111  | ≥61 years    | multicomorbidity | outpatients | government/ private no profit | not reported    | not reported                    | not reported |
|    |                      |      | trivalent inactivated intradermal           | 111  |              |                  |             |                               |                 |                                 |              |
| 31 | Bracco Neto cohort 1 | 2009 | trivalent live attenuated nasal spray       | 944  | <5 years     | healthy subjects | outpatients | industry                      | Multi-continent | South Africa, Brazil, Argentina | multi-center |
|    |                      |      | placebo                                     | 941  |              |                  |             |                               |                 |                                 |              |
|    | Bracco Neto cohort 2 | 2009 | placebo                                     | 342  |              |                  |             |                               |                 |                                 |              |
|    |                      |      | trivalent live attenuated nasal spray       | 338  |              |                  |             |                               |                 |                                 |              |
| 32 | Brady                | 2018 | trivalent live attenuated nasal spray       | 124  | 18 -60 years | pregnant women   | outpatients | government/ private no profit | North America   | USA                             | multi center |
|    |                      |      | trivalent inactivated (subunit or split) IM | 124  |              |                  |             |                               |                 |                                 |              |
| 33 | Bridges cohort 1     | 2000 | trivalent inactivated) IM                   | 595  | 18 -60 years | healthy subjects | outpatients | government/ private no profit | North America   | USA                             | not reported |
|    |                      |      | placebo                                     | 589  |              |                  |             |                               |                 |                                 |              |
|    | Bridges cohort 2     | 2000 | trivalent inactivated IM                    | 587  | 18 -60 years | healthy subjects | outpatients | government/ private no profit |                 |                                 |              |
|    |                      |      | placebo                                     | 604  |              |                  |             |                               |                 |                                 |              |



|    |                |      |                                                        |      |                     |                              |             |                               |               |                        |               |
|----|----------------|------|--------------------------------------------------------|------|---------------------|------------------------------|-------------|-------------------------------|---------------|------------------------|---------------|
| 34 | Brooks         | 2016 | trivalent live attenuated nasal spray                  | 1174 | <5 years            | healthy subjects             | outpatients | government/ private no profit | Africa        | Bangladesh             | multi-center  |
|    |                |      | placebo                                                | 587  |                     |                              |             |                               |               |                        |               |
| 35 | Bueving        | 2004 | trivalent inactivated IM                               | 347  | 6-17 years          | chronic respiratory disease  | outpatients | government/ private no profit | Europe        | Holland                | not reported  |
|    |                |      | placebo                                                | 349  |                     |                              |             |                               |               |                        |               |
| 36 | Cadorna-Carlos | 2015 | quadrivalent inactivated IM                            | 1648 | 18 -60 years        | healthy subjects             | outpatients | not reported                  | Oceania       | Philippines, Australia | multi center  |
|    |                |      | trivalent inactivated IM                               | 56   |                     |                              |             |                               |               |                        |               |
|    |                |      | quadrivalent inactivated IM                            | 329  | 6-17 years          | healthy subjects             | outpatients |                               |               |                        |               |
|    |                |      | trivalent inactivated IM                               | 55   |                     |                              |             |                               |               |                        |               |
| 37 | Caldera        | 2019 | trivalent inactivated high doses (subunit or split) IM | 25   | 18 -60 years        | immunodepression (any cause) | outpatients | government/ private no profit | North America | USA                    | multi center  |
|    |                |      | quadrivalent inactivated (subunit or split) IM         | 15   |                     |                              |             |                               |               |                        |               |
| 38 | Carr           | 2011 | trivalent inactivated IM                               | 27   | mixed aged children | cancer                       | outpatients | industry                      | North America | USA                    | not reported  |
|    |                |      | trivalent live attenuated nasal spray                  | 28   |                     |                              |             |                               |               |                        |               |
| 39 | Chan           | 2014 | trivalent inactivated IM                               | 50   | ≥61 years           | multicomorbidity             | inpatients  | government/ private no profit | Asia          | Hong Kong              | single center |
|    |                |      | trivalent inactivated intradermal                      | 50   |                     |                              |             |                               |               |                        |               |

|    |       |      |                                                        |      |                     |                  |             |                               |               |                   |              |
|----|-------|------|--------------------------------------------------------|------|---------------------|------------------|-------------|-------------------------------|---------------|-------------------|--------------|
| 40 | Chang | 2019 | quadrivalent inactivated high doses IM                 | 1777 | 61 years and older  | multicomorbidity | outpatients | industry                      | North America | USA               | multi center |
|    |       |      | trivalent inactivated high doses (subunit or split) IM | 893  |                     |                  |             | industry                      |               | USA               |              |
| 41 | Chi   | 2010 | trivalent inactivated IM                               | 65   | ≥61 years           | multicomorbidity | outpatients | government/ private no profit | North America | Washington        | not reported |
|    |       |      | trivalent inactivated intradermal                      | 63   |                     |                  |             |                               |               |                   |              |
| 43 | Chiu  | 2007 | trivalent inactivated IM                               | 56   | mixed aged children | healthy subjects | outpatients | government/ private no profit | Asia          | Hong Kong         | not reported |
|    |       |      | trivalent inactivated intradermal                      | 56   |                     |                  |             |                               |               |                   |              |
| 42 | Chiu  | 2009 | trivalent inactivated IM                               | 63   | <5 years            | healthy subjects | outpatients | government/ private no profit | Asia          | Hong Kong         | not reported |
|    |       |      | trivalent inactivated intradermal                      | 63   |                     |                  |             |                               |               |                   |              |
| 44 | Choi  | 2018 | trivalent inactivated (IM                              | 100  | adult and elderly   | healthy subjects | outpatients | industry                      | Asia          | Republic of Korea | multi center |
|    |       |      | quadrivalent inactivated IM                            | 200  |                     |                  |             |                               |               |                   |              |
| 45 | Choi  | 2017 | trivalent inactivated) IM                              | 751  | adult and elderly   | healthy subjects | outpatients | industry                      | Asia          | Republic of Korea | multi center |
|    |       |      | quadrivalent inactivated IM                            | 752  |                     |                  |             |                               |               |                   |              |

|    |           |      |                                                                                  |      |                    |                              |             |                               |                 |                                   |               |
|----|-----------|------|----------------------------------------------------------------------------------|------|--------------------|------------------------------|-------------|-------------------------------|-----------------|-----------------------------------|---------------|
| 47 | Chuaychoo | 2019 | trivalent inactivated (subunit or split) IM                                      | 39   | 61 years and older | chronic respiratory disease  | outpatients | government/ private no profit | Asia            | Bangkok, Thailand                 | single center |
|    |           | 2019 | trivalent inactivated (subunit or split) intradermal ID                          | 41   | 61 years and older | chronic respiratory disease  | outpatients | government/ private no profit |                 | Bangkok, Thailand                 |               |
| 48 | Claeys    | 2018 | quadrivalent inactivated (subunit or split) IM                                   | 6006 | <5 years           | healthy subjects             | outpatients | industry                      | Multi continent | Europe, Central America, and Asia | multi center  |
|    |           | 2018 | pneumococcal conjugate vaccine (PCV), hepatitis A vaccine, or varicella vaccine. | 6012 |                    |                              |             |                               |                 |                                   |               |
| 49 | Colmegna  | 2020 | trivalent inactivated high doses (subunit or split) IM                           | 139  | adult and elderly  | immunodepression (any cause) | outpatients | industry                      | North America   | Canada                            | multi center  |
|    |           | 2020 | quadrivalent inactivated (subunit or split) IM                                   | 140  |                    |                              |             |                               |                 |                                   |               |
| 49 | Colombo   | 2001 | trivalent inactivated IM                                                         | 177  | <5 years           | healthy subjects             | outpatients | government/ private no profit | Europe          | Italy                             | not reported  |
|    |           |      | no vaccine                                                                       | 167  |                    |                              |             |                               |                 |                                   |               |
| 51 | Couch     | 2007 | trivalent inactivated IM                                                         | 208  | ≥61 years          | healthy subjects             | outpatients | government/ private no profit | North America   | USA                               | multi center  |
|    |           |      | trivalent inactivated high doses IM                                              | 206  |                    |                              |             |                               |                 |                                   |               |
| 52 | Cowling   | 2010 | trivalent inactivated IM                                                         | 71   | 6-17 years         | healthy subjects             | outpatients | government/ private no profit | Asia            | Hong Kong                         | not reported  |
|    |           |      | placebo                                                                          | 48   |                    |                              |             |                               |                 |                                   |               |
| 53 | Cowling   | 2014 | trivalent inactivated IM                                                         | 479  | 6-17 years         | healthy subjects             | outpatients | government/ private no profit | Asia            | Hong Kong                         | multi center  |
|    |           |      | placebo                                                                          | 317  |                    |                              |             |                               |                 |                                   |               |

|    |             |      |                                                                  |     |                    |                  |             |                               |               |                                      |               |
|----|-------------|------|------------------------------------------------------------------|-----|--------------------|------------------|-------------|-------------------------------|---------------|--------------------------------------|---------------|
| 54 | Cowling     | 2020 | quadrivalent inactivated (subunit or split) IM                   | 508 | 61 years and older | multicomorbidity | outpatients | government/ private no profit | Asia          | Hong Kong                            | single center |
|    |             |      | trivalent inactivated adjuvanted (subunit or split) MF59/AS03 IM | 508 | 61 years and older | multicomorbidity | outpatients | government/ private no profit |               | Hong Kong                            |               |
|    |             |      | trivalent inactivated high doses (subunit or split) IM           | 510 | 61 years and older | multicomorbidity | outpatients | government/ private no profit |               | Hong Kong                            |               |
|    |             |      | quadrivalent inactivated recombinant                             | 335 | 61 years and older | multicomorbidity | outpatients | government/ private no profit |               | Hong Kong                            |               |
| 55 | Cruz-Valdez | 2018 | trivalent inactivated IM                                         | 143 | <5 years           | healthy subjects | outpatients | industry                      | South America | Mexico                               | multi center  |
|    |             |      | trivalent inactivated adjuvanted MF59/AS03 IM                    | 144 |                    |                  |             |                               |               |                                      |               |
| 57 | De Bruijn   | 2006 | trivalent inactivated IM                                         | 129 | adult and elderly  | healthy subjects | outpatients | not reported                  | not reported  | not reported                         | not reported  |
|    |             |      | trivalent inactivated adjuvanted virosome/liposome               | 127 |                    |                  |             |                               |               |                                      |               |
|    |             |      | trivalent inactivated adjuvanted MF59/AS03 IM                    | 130 |                    |                  |             |                               |               |                                      |               |
| 56 | De Bruijn   | 2007 | trivalent inactivated IM                                         | 129 | ≥61 years          | healthy subjects | outpatients | not reported                  | Europe        | Germany, Sweden, Lithuania, Bulgaria | multi center  |
|    |             |      | trivalent inactivated adjuvanted MF59/AS03 IM                    | 130 |                    |                  |             |                               |               |                                      |               |
|    |             |      | trivalent inactivated adjuvanted virosome/liposome               | 127 |                    |                  |             |                               |               |                                      |               |

|    |              |      |                                                                  |       |              |                  |             |                               |               |                          |               |
|----|--------------|------|------------------------------------------------------------------|-------|--------------|------------------|-------------|-------------------------------|---------------|--------------------------|---------------|
| 58 | De Donato    | 1999 | trivalent inactivated adjuvanted MF59/AS03 IM                    | 106   | ≥61 years    | healthy subjects | outpatients | not reported                  | Europe        | Italy                    | not reported  |
|    |              |      | trivalent inactivated IM                                         | 105   |              |                  |             |                               |               |                          |               |
| 59 | De Villiers  | 2009 | trivalent live attenuated nasal spray                            | 1620  | ≥61 years    | multicomorbidity | outpatients | industry                      | Africa        | Republic of South Africa | multi center  |
|    |              |      | placebo                                                          | 1622  |              |                  |             |                               |               |                          |               |
| 61 | Desheva      | 2002 | trivalent live attenuated nasal spray                            | 184   | <5 years     | healthy subjects | outpatients | not reported                  | Asia          | Russia                   | not reported  |
|    |              |      | placebo                                                          | 72    |              |                  |             |                               |               |                          |               |
| 62 | Diallo 2018  | 2018 | trivalent inactivated (subunit or split) IM                      | 119   | <5 years     | healthy subjects | outpatients | government/ private no profit | Africa        | Senegal                  | single center |
|    |              |      | trivalent inactivated adjuvanted (subunit or split) MF59/AS03 IM | 118   | <5 years     | healthy subjects | outpatients | government/ private no profit |               | Senegal                  |               |
|    |              |      | placebo/no intervention                                          | 59    | <5 years     | healthy subjects | outpatients | government/ private no profit |               | Senegal                  |               |
| 63 | DiazGranados | 2013 | trivalent inactivated IM                                         | 3055  | ≥61 years    | multicomorbidity | outpatients | industry                      | North America | USA                      | multi center  |
|    |              |      | trivalent inactivated high doses IM                              | 6117  |              |                  |             |                               |               |                          |               |
| 64 | DiazGranados | 2014 | trivalent inactivated IM                                         | 15998 | ≥61 years    | multicomorbidity | outpatients | industry                      | North America | USA, Canada              | multi center  |
|    |              |      | trivalent inactivated high doses IM                              | 15991 |              |                  |             |                               |               |                          |               |
| 65 | DiazGranados | 2015 | trivalent inactivated high doses IM                              | 148   | 18 -60 years | healthy subjects | outpatients | industry                      | North America | USA, Canada              | multi center  |
|    |              |      | trivalent inactivated IM                                         | 152   |              |                  |             |                               |               |                          |               |

|    |                  |      |                                                |      |                     |                             |             |                               |                 |                                                   |              |
|----|------------------|------|------------------------------------------------|------|---------------------|-----------------------------|-------------|-------------------------------|-----------------|---------------------------------------------------|--------------|
| 66 | Domachowske      | 2013 | trivalent inactivated IM                       | 1823 | mixed aged children | healthy subjects            | outpatients | industry                      | Multi-continent | Czech Republic, France, Germany, Philippines, USA | multi center |
|    |                  |      | quadrivalent inactivated (subunit or split) IM | 915  |                     |                             |             |                               |                 |                                                   |              |
| 67 | Dunkle           | 2017 | quadrivalent inactivated IM                    | 4505 | adult and elderly   | healthy subjects            | outpatients | government/ private no profit | North America   | USA                                               | multi center |
|    |                  |      | quadrivalent inactivated recombinant           | 4498 |                     |                             |             |                               |                 |                                                   |              |
| 69 | Dunkle b         | 2017 | quadrivalent inactivated IM                    | 339  | 18 -60 years        | healthy subjects            | outpatients | government/ private no profit | North America   | USA                                               | multi center |
|    |                  |      | quadrivalent inactivated recombinant           | 1011 |                     |                             |             |                               |                 |                                                   |              |
| 68 | Dunkle           | 2018 | quadrivalent inactivated recombinant           | 108  | 6-17 years          | healthy subjects            | outpatients | industry                      | North America   | USA                                               | multi center |
|    |                  |      | quadrivalent inactivated (subunit or split) IM | 111  | 6-17 years          |                             |             |                               |                 |                                                   |              |
| 70 | Durando cohort 1 | 2008 | trivalent inactivated adjuvanted MF59/AS03 IM  | 81   | 18 -60 years        | healthy subjects            | outpatients | industry                      | Europe          | Italy                                             | multi center |
|    |                  |      | trivalent inactivated IM                       | 80   |                     |                             |             |                               |                 |                                                   |              |
|    | Durando cohort 2 |      | trivalent inactivated adjuvanted MF59/AS03 IM  | 46   | 18 -60 years        | imunodepression (any cause) | outpatients | industry                      |                 |                                                   |              |
|    |                  |      | trivalent inactivated IM                       | 49   |                     |                             |             |                               |                 |                                                   |              |
| 71 | Englund          | 2010 | trivalent inactivated IM                       | 915  | <5 years            | healthy subjects            | outpatients | not reported                  | North America   | USA                                               | multi center |
|    |                  |      | placebo                                        | 460  |                     |                             |             |                               |                 |                                                   |              |

|    |          |      |                                                                                                                                                                                    |      |                       |                                      |             |                                  |               |                |                 |
|----|----------|------|------------------------------------------------------------------------------------------------------------------------------------------------------------------------------------|------|-----------------------|--------------------------------------|-------------|----------------------------------|---------------|----------------|-----------------|
| 72 | Esposito | 2010 | trivalent inactivated IM                                                                                                                                                           | 91   | <5 years              | cancer                               | outpatients | government/ private<br>no profit | Europe        | Italy          | multi<br>center |
|    |          |      | no vaccine                                                                                                                                                                         | 91   |                       |                                      |             |                                  |               |                |                 |
| 73 | Esposito | 2011 | trivalent inactivated IM                                                                                                                                                           | 37   | 6-17 years            | healthy subjects                     | outpatients | government/ private<br>no profit | Europe        | Italy          | not<br>reported |
|    |          |      | trivalent inactivated<br>intradermal                                                                                                                                               | 75   |                       |                                      |             |                                  |               |                |                 |
| 74 | Esposito | 2014 | trivalent inactivated IM                                                                                                                                                           | 30   | 6-17 years            | imunodepression (any<br>cause)       | outpatients | government/ private<br>no profit | Europe        | Italy          | not<br>reported |
|    |          |      | trivalent inactivated<br>adjuvanted<br>virosome/liposome                                                                                                                           | 30   |                       |                                      |             |                                  |               |                |                 |
| 75 | Essink   | 2019 | quadrivalent inactivated<br>adjuvanted<br>MF5quadrivalent<br>inactivated<br>intradermal/ASplacebo/no<br>intervention trivalent<br>inactivated (subunit or<br>split) intradermal ID | 889  | 61 years<br>and older | healthy<br>subjects+multicomortibity | outpatients | industry                         | North America | 20 centers usa | multi<br>center |
|    |          |      | trivalent inactivated<br>adjuvanted (subunit or<br>split) MF59/AS03 IM                                                                                                             | 889  | 61 years<br>and older | healthy<br>subjects+multicomortibity | outpatients | industry                         |               | 20 centers usa |                 |
| 76 | Evison   | 2009 | trivalent inactivated IM                                                                                                                                                           | 151  | 18 -60<br>years       | imunodepression (any<br>cause)       | outpatients | industry                         | Europe        | Switzerland    | not<br>reported |
|    |          |      | trivalent inactivated<br>adjuvanted<br>virosome/liposome                                                                                                                           | 153  |                       |                                      |             |                                  |               |                |                 |
| 77 | Falsey   | 2009 | trivalent inactivated IM                                                                                                                                                           | 1288 | ≥61 years             | multicomortibity                     | outpatients | industry                         | North America | USA            | multi<br>center |
|    |          |      | trivalent inactivated high<br>doses IM                                                                                                                                             | 2588 |                       |                                      |             |                                  |               |                |                 |

|    |         |      |                                               |      |              |                             |             |                               |                 |                                                                                                                     |              |
|----|---------|------|-----------------------------------------------|------|--------------|-----------------------------|-------------|-------------------------------|-----------------|---------------------------------------------------------------------------------------------------------------------|--------------|
| 79 | Fleming | 2006 | trivalent live attenuated nasal spray         | 1114 | 6-17 years   | chronic respiratory disease | outpatients | industry                      | Multi-continent | Belgium, Finland, Germany, Greece, Israel, Italy, the Netherlands, Norway, Poland, Portugal, Spain, Switzerland, UK | multi center |
|    |         |      | trivalent inactivated IM                      | 1115 |              |                             |             |                               |                 |                                                                                                                     |              |
| 80 | Forrest | 2011 | trivalent inactivated IM                      | 1501 | ≥61 years    | healthy subjects            | outpatients | industry                      | Africa          | Republic of South Africa                                                                                            | multi center |
|    |         |      | trivalent live attenuated nasal spray         | 1508 |              |                             |             |                               |                 |                                                                                                                     |              |
| 81 | Frenck  | 2011 | trivalent inactivated IM                      | 398  | 18 -60 years | healthy subjects            | outpatients | government/ private no profit | North America   | USA                                                                                                                 | multi center |
|    |         |      | trivalent inactivated intradermal             | 394  |              |                             |             |                               |                 |                                                                                                                     |              |
| 83 | Frey    | 2010 | trivalent inactivated IM                      | 7504 | 18 -60 years | healthy subjects            | outpatients | industry                      | Multi-continent | USA, Finland, Poland                                                                                                | multi center |
|    |         |      | placebo                                       | 3900 |              | healthy subjects            | outpatients | industry                      |                 |                                                                                                                     |              |
| 82 | Frey    | 2003 | trivalent inactivated IM                      | 151  | 18 -60 years | healthy subjects            | outpatients | Not reported                  | North America   | USA                                                                                                                 | multi center |
|    |         |      | trivalent inactivated adjuvanted MF59/AS03 IM | 150  |              |                             |             |                               |                 |                                                                                                                     |              |



|    |           |      |                                               |      |              |                             |             |                               |                 |                                    |              |
|----|-----------|------|-----------------------------------------------|------|--------------|-----------------------------|-------------|-------------------------------|-----------------|------------------------------------|--------------|
| 84 | Frey      | 2014 | trivalent inactivated IM                      | 3552 | ≥61 years    | healthy subjects            | outpatients | industry                      | Multi-continent | Colombia, Panama, Philippines, USA | multi center |
|    |           |      | trivalent inactivated adjuvanted MF59/AS03 IM | 3552 |              |                             |             |                               |                 |                                    |              |
| 85 | Gabutti   | 2005 | trivalent inactivated IM                      | 19   | 18 -60 years | imunodepression (any cause) | outpatients | government/ private no profit | Europe          | Italy                              | multi center |
|    |           |      | trivalent inactivated adjuvanted MF59/AS03 IM | 18   |              |                             |             |                               |                 |                                    |              |
| 86 | Gasparini | 2001 | trivalent inactivated IM                      | 104  | ≥61 years    | healthy subjects            | outpatients | not reported                  | Europe          | Italy                              | multi center |
|    |           |      | trivalent inactivated adjuvanted MF59/AS03 IM | 204  |              |                             |             |                               |                 |                                    |              |
| 87 | Giaquinta | 2014 | trivalent inactivated IM                      | 15   | 3-17 years   | solid organ transplantation | outpatients | industry                      | North America   | USA                                | multi center |
|    |           |      | trivalent inactivated high doses IM           | 23   |              |                             |             |                               |                 |                                    |              |
| 89 | Gorse b   | 2013 | trivalent inactivated IM                      | 495  | 18 -60 years | healthy subjects            | outpatients | industry                      | North America   | USA                                | multi center |
|    |           |      | trivalent inactivated intradermal             | 755  |              |                             |             |                               |                 |                                    |              |
| 90 | Gorse     | 2015 | trivalent inactivated intradermal             | 1683 | 18 -60 years | healthy subjects            | outpatients | industry                      | North America   | USA                                | multi center |
|    |           |      | quadrivalent inactivated intradermal          | 1672 |              |                             |             |                               |                 |                                    |              |
| 88 | Gorse     | 2013 | trivalent inactivated IM                      | 1428 | 18 -60 years | healthy subjects            | outpatients | industry                      | North America   | USA                                | multi center |
|    |           |      | trivalent inactivated intradermal             | 2864 |              |                             |             |                               |                 |                                    |              |

|    |           |      |                                       |      |                   |                                     |             |                               |               |             |               |
|----|-----------|------|---------------------------------------|------|-------------------|-------------------------------------|-------------|-------------------------------|---------------|-------------|---------------|
| 91 | Govaert   | 1993 | quadrivalent inactivated IM           | 927  | ≥61 years         | multicomorbidity                    | outpatients | government/ private no profit | Europe        | Netherlands | multi center  |
|    |           |      | placebo                               | 911  |                   |                                     |             |                               |               |             |               |
| 92 | Greenberg | 2014 | trivalent inactivated IM              | 1461 | 6-17 years        | healthy subjects                    | outpatients | industry                      | North America | USA         | multi center  |
|    |           |      | quadrivalent inactivated IM           | 2902 |                   | healthy subjects                    | outpatients | industry                      |               |             |               |
| 94 | Greenberg | 2017 | trivalent inactivated IM              | 450  | ≥61 years         | healthy subjects                    | outpatients | industry                      | North America | USA         | multi center  |
|    |           |      | quadrivalent inactivated IM           | 225  |                   |                                     |             |                               |               |             |               |
| 93 | Greenberg | 2013 | trivalent inactivated IM              | 380  | adult and elderly | healthy subjects                    | outpatients | industry                      | North America | USA         | multi center  |
|    |           |      | quadrivalent inactivated IM           | 190  |                   |                                     |             |                               |               |             |               |
| 95 | Hakim     | 2016 | trivalent inactivated) IM             | 42   | 6-17 years        | cancer +imunodepression (any cause) | outpatients | government/ private no profit | North America | USA         | single center |
|    |           |      | trivalent inactivated high doses IM   | 41   |                   |                                     |             |                               |               |             |               |
| 96 | Halasa    | 2011 | trivalent live attenuated nasal spray | 10   | 6-17 years        | imunodepression (any cause)         | outpatients | industry                      | North America | USA         | multi center  |
|    |           |      | placebo                               | 10   |                   |                                     |             |                               |               |             |               |
| 97 | Halasa    | 2016 | trivalent inactivated IM              | 15   | 18 -60 years      | transplantation                     | outpatients | industry                      | North America | USA         | single center |
|    |           |      | trivalent inactivated high doses IM   | 29   |                   |                                     |             |                               |               |             |               |

|     |                    |      |                                       |      |              |                  |             |                               |               |                        |               |
|-----|--------------------|------|---------------------------------------|------|--------------|------------------|-------------|-------------------------------|---------------|------------------------|---------------|
| 98  | Hartvickson        | 2015 | trivalent inactivatedIM               | 1174 | 6-17 years   | healthy subjects | outpatients | industry                      | North America | USA                    | multi center  |
|     |                    |      | quadrivalent inactivated IM           | 1159 |              |                  |             |                               |               |                        |               |
| 99  | Hobermann cohort 1 | 2003 | trivalent inactivated IM              | 278  | <5 years     | healthy subjects | outpatients | industry                      | North America | USA                    | single center |
|     |                    |      | placebo                               | 139  |              |                  |             |                               |               |                        |               |
|     | Hobermann cohort 2 | 2003 | trivalent inactivated IM              | 253  | <5 years     | healthy subjects | outpatients |                               |               |                        |               |
|     |                    |      | placebo                               | 123  |              |                  |             |                               |               |                        |               |
| 100 | Hoft               | 2011 | trivalent inactivated IM              | 14   | <5 years     | healthy subjects | outpatients | government/ private no profit | North America | USA                    | multi center  |
|     |                    |      | trivalent live attenuated nasal spray | 13   |              |                  |             |                               |               |                        |               |
| 101 | Holland            | 2008 | trivalent inactivated IM              | 368  | ≥61 years    | multicomorbidity | outpatients | industry                      | Oceania       | Australia, New Zealand | multi center  |
|     |                    |      | trivalent inactivated intradermal     | 370  |              |                  |             |                               |               |                        |               |
| 102 | Hoon Han cohort 1  | 2013 | trivalent inactivated IM              | 60   | 18 -60 years | healthy subjects | outpatients | not reported                  | Asia          | South Korea            | multi center  |
|     |                    |      | trivalent inactivatedintradermal      | 60   |              |                  |             |                               |               |                        |               |
|     | Hoon Han cohort 2  | 2013 | trivalent inactivated IM              | 60   | ≥61 years    | healthy subjects | outpatients |                               |               |                        |               |
|     |                    |      | trivalent inactivated intradermal     | 60   |              |                  |             |                               |               |                        |               |

|     |                    |        |                                                         |      |                    |                  |             |                               |               |                                        |               |
|-----|--------------------|--------|---------------------------------------------------------|------|--------------------|------------------|-------------|-------------------------------|---------------|----------------------------------------|---------------|
| 103 | Hu                 | 2019 b | quadrivalent inactivated (subunit or split) IM          | 1160 | <5 years           | healthy subjects | outpatients | industry                      | Asia          | China                                  | multi center  |
|     |                    |        | trivalent inactivated (subunit or split) IM             | 1160 | <5 years           |                  |             |                               |               |                                        |               |
| 104 | Hui                | 2006   | trivalent inactivated IM                                | 65   | ≥61 years          | healthy subjects | outpatients | government/ private no profit | Asia          | Hong Kong                              | multi center  |
|     |                    |        | placebo                                                 | 63   |                    |                  |             |                               |               |                                        |               |
| 105 | Hung               | 2012   | trivalent inactivated (subunit or split) intradermal ID | 133  | 61 years and older | multicomorbidity | outpatients | government/ private no profit | Asia          | Hong Kong                              | single center |
|     |                    |        | trivalent inactivated (subunit or split) IM             | 66   |                    |                  |             |                               |               |                                        |               |
| 106 | Hurwitz            | 2000   | trivalent inactivated (subunit or split) IM             | 76   | <5 years           | healthy subjects | outpatients | industry                      | North America | 10 US Navy–affiliated day care centers | multi center  |
|     |                    |        | hepatitis A vaccine                                     | 74   |                    |                  |             |                               |               |                                        |               |
| 108 | Jackson cohort 1   | 2010   | trivalent inactivated IM                                | 1734 | 18 -60 years       | healthy subjects | outpatients | industry                      | North America | USA                                    | multi center  |
|     |                    |        | placebo                                                 | 1756 |                    |                  |             |                               |               |                                        |               |
|     | Jackson cohort 1+2 | 2010   | trivalent inactivated IM                                | 3783 | 18 -60 years       | healthy subjects | outpatients |                               |               |                                        |               |
|     |                    |        | placebo                                                 | 3828 |                    |                  |             |                               |               |                                        |               |
|     | Jackson cohort 2   | 2010   | trivalent inactivated IM                                | 2048 | 18 -60 years       | healthy subjects | outpatients |                               |               |                                        |               |
|     |                    |        | placebo                                                 | 2073 |                    |                  |             |                               |               |                                        |               |

|     |        |      |                                                        |     |              |                                            |             |                                        |                 |                         |               |
|-----|--------|------|--------------------------------------------------------|-----|--------------|--------------------------------------------|-------------|----------------------------------------|-----------------|-------------------------|---------------|
| 109 | Jamshe | 2019 | trivalent inactivated (subunit or split) IM            | 51  | 18 -60 years | cancer                                     | outpatients | industry+government/ private no profit | North America   | USA                     | single center |
|     |        |      | trivalent inactivated high doses (subunit or split) IM | 54  | 18 -60 years |                                            |             |                                        |                 |                         |               |
| 110 | Jeffs  | 2015 | trivalent inactivated IM                               | 24  | 18 -60 years | immunosuppression in autoimmune vasculitis | outpatients | government/ private no profit          | Oceania         | Australia               | not reported  |
|     |        |      | no vaccine                                             | 7   |              |                                            |             |                                        |                 |                         |               |
|     |        |      | trivalent inactivated IM                               | 53  | 18 -60 years | healthy subjects                           | outpatients |                                        |                 |                         |               |
|     |        |      | no vaccine                                             | 14  |              |                                            |             |                                        |                 |                         |               |
| 111 | Kanra  | 2004 | trivalent inactivated IM                               | 228 | <5 years     | healthy subjects                           | outpatients | industry                               | Multi-continent | Germany, Italy, Turkey. | multi center  |
|     |        |      | trivalent inactivated recombinant                      | 224 |              |                                            |             |                                        |                 |                         |               |
| 112 | Keitel | 2006 | placebo                                                | 50  | ≥61 years    | healthy subjects                           | outpatients | government/ private no profit          | North America   | USA                     | single center |
|     |        |      | trivalent inactivated IM                               | 51  |              |                                            |             |                                        |                 |                         |               |
|     |        |      | trivalent inactivated high doses IM                    | 50  |              |                                            |             |                                        |                 |                         |               |
| 114 | Keitel | 2009 | trivalent inactivated IM                               | 434 | ≥61 years    | healthy subjects                           | outpatients | not reported                           | not reported    | not reported            | multi center  |
|     |        |      | trivalent inactivated recombinant                      | 436 |              |                                            |             |                                        |                 |                         |               |

|     |                 |      |                                             |     |              |                  |             |                               |               |      |              |
|-----|-----------------|------|---------------------------------------------|-----|--------------|------------------|-------------|-------------------------------|---------------|------|--------------|
| 113 | Keitel cohort 1 | 1997 | placebo                                     | 298 | 18 -60 years | healthy subjects | outpatients | government/ private no profit | North America | USA  | multi center |
|     |                 |      | trivalent inactivated IM                    | 300 |              |                  |             |                               |               |      |              |
|     | Keitel cohort 2 | 1997 | placebo                                     | 241 | 18 -60 years | healthy subjects | outpatients |                               |               |      |              |
|     |                 |      | trivalent inactivated IM                    | 457 |              |                  |             |                               |               |      |              |
|     | Keitel cohort 3 | 1997 | placebo                                     | 253 | 18 -60 years | healthy subjects | outpatients |                               |               |      |              |
|     |                 |      | trivalent inactivated IM                    | 577 |              |                  |             |                               |               |      |              |
|     | Keitel cohort 4 | 1997 | placebo                                     | 217 | 18 -60 years | healthy subjects | outpatients |                               |               |      |              |
|     |                 |      | trivalent inactivated IM                    | 723 |              |                  |             |                               |               |      |              |
|     | Keitel cohort 5 | 1997 | placebo                                     | 145 | 18 -60 years | healthy subjects | outpatients |                               |               |      |              |
|     |                 |      | trivalent inactivated IM                    | 789 |              |                  |             |                               |               |      |              |
| 115 | Khajedaluae     | 2018 | trivalent inactivated (subunit or split) IM | 500 | <5 years     | healthy subjects | outpatients | not reported                  | Asia          | Iran | multi center |
|     |                 |      | placebo/no intervention                     | 500 | <5 years     |                  |             |                               |               |      |              |

|     |               |      |                                               |      |                     |                             |             |                               |                 |                                              |               |
|-----|---------------|------|-----------------------------------------------|------|---------------------|-----------------------------|-------------|-------------------------------|-----------------|----------------------------------------------|---------------|
| 116 | Khan          | 1996 | trivalent inactivated IM                      | 168  | 6-17 years          | healthy subjects            | outpatients | not reported                  | Asia            | Russia                                       | not reported  |
|     |               |      | placebo                                       | 187  |                     |                             |             |                               |                 |                                              |               |
|     |               |      | trivalent live attenuated                     | 200  |                     |                             |             |                               |                 |                                              |               |
| 117 | Kieninger     | 2013 | trivalent inactivated IM                      | 1620 | adult and elderly   | healthy subjects            | outpatients | industry                      | Multi-continent | Germany, Romania, Spain, Korea, Taiwan , USA | multi center  |
|     |               |      | quadrivalent inactivated IM                   | 3036 |                     |                             |             |                               |                 |                                              |               |
| 118 | King cohort 1 | 2000 | trivalent live attenuated nasal spray         | 27   | 18 -60 years        | healthy subjects            | outpatients | not reported                  | North America   | USA                                          | multi center  |
|     |               |      | placebo                                       | 27   | 18 -60 years        |                             |             |                               |                 |                                              |               |
|     | King cohort 2 | 2000 | trivalent live attenuated nasal spray         | 28   | 18 -60 years        | imunodepression (any cause) | outpatients |                               |                 |                                              |               |
|     |               |      | placebo                                       | 29   | 18 -60 years        |                             |             |                               |                 |                                              |               |
| 119 | King          | 1998 | trivalent live attenuated nasal spray         | 234  | mixed aged children | healthy subjects            | outpatients | industry                      | North America   | USA                                          | multi center  |
|     |               |      | placebo                                       | 122  |                     |                             |             |                               |                 |                                              |               |
| 120 | Kositantont   | 2004 | trivalent inactivated IM                      | 61   | ≥61 years           | chronic respiratory disease | outpatients | government/ private no profit | Asia            | Thailand                                     | single center |
|     |               |      | placebo                                       | 62   |                     |                             |             |                               |                 |                                              |               |
| 121 | Kumar         | 2016 | trivalent inactivated IM                      | 34   | 18 -60 years        | imunodepression (any cause) | outpatients | government/ private no profit | North America   | Canada                                       | single center |
|     |               |      | trivalent inactivated adjuvanted MF59/AS03 IM | 34   |                     |                             |             |                               |                 |                                              |               |

|     |              |      |                                                    |      |                     |                             |             |                               |                 |                                      |              |
|-----|--------------|------|----------------------------------------------------|------|---------------------|-----------------------------|-------------|-------------------------------|-----------------|--------------------------------------|--------------|
| 122 | Lan          | 2019 | trivalent inactivated (subunit or split) IM        | 740  | 18 -60 years        | healthy subjects            | outpatients | government/ private no profit | Asia            | Vietnam                              | not reported |
|     |              |      | placebo/no intervention                            | 148  |                     |                             |             |                               |                 |                                      |              |
| 124 | Langley      | 2014 | trivalent inactivated IM                           | 302  | <5 years            | healthy subjects            | outpatients | industry                      | Multi-continent | Canada, Dominican Republic, Honduras | multi center |
|     |              |      | quadrivalent inactivated IM                        | 299  |                     |                             |             |                               |                 |                                      |              |
| 123 | Langley      | 2013 | trivalent inactivated IM                           | 1861 | mixed aged children | healthy subjects            | outpatients | industry                      | Multi-continent | Canada, USA, Mexico, Spain, Taiwan   | multi center |
|     |              |      | quadrivalent inactivated IM                        | 932  |                     |                             |             |                               |                 |                                      |              |
| 125 | Leroux-Roels | 2008 | trivalent inactivatedIM                            | 390  | 18 -60 years        | healthy subjects            | outpatients | industry                      | Europe          | Belgium, Germany, Switzerland        | multi center |
|     |              |      | trivalent inactivated intradermal                  | 588  |                     |                             |             |                               |                 |                                      |              |
| 127 | Levin        | 2008 | trivalent inactivated IM                           | 121  | 6-17 years          | imunodepression (any cause) | outpatients | government/ private no profit | North America   | USA                                  | not reported |
|     |              |      | trivalent live attenuated nasal spray              | 122  |                     |                             |             |                               |                 |                                      |              |
| 128 | Levin        | 2016 | trivalent inactivated intradermal                  | 60   | ≥61 years           | healthy subjects            | outpatients | industry                      | Europe          | Germany, Belgium                     | multi center |
|     |              |      | trivalent inactivated adjuvanted MF59/AS03 IM      | 63   |                     |                             |             |                               |                 |                                      |              |
|     |              |      | trivalent inactivated adjuvanted virosome/liposome | 63   |                     |                             |             |                               |                 |                                      |              |



|     |            |      |                                                |     |                     |                             |             |                                        |                 |                                                                                                                                      |               |
|-----|------------|------|------------------------------------------------|-----|---------------------|-----------------------------|-------------|----------------------------------------|-----------------|--------------------------------------------------------------------------------------------------------------------------------------|---------------|
| 129 | Li         | 2008 | trivalent inactivated IM                       | 200 | ≥61 years           | healthy subjects            | outpatients | industry                               | Asia            | China                                                                                                                                | not reported  |
|     |            |      | trivalent inactivated adjuvanted MF59/AS03 IM  | 400 |                     |                             |             |                                        |                 |                                                                                                                                      |               |
| 130 | Liebowitz  | 2020 | quadrivalent inactivated (subunit or split) IM | 72  | 18 -60 years        | healthy subjects            | outpatients | government/ private no profit          | North America   | USA                                                                                                                                  | not reported  |
|     |            |      | placebo/no intervention                        | 36  |                     |                             |             |                                        |                 |                                                                                                                                      |               |
| 131 | Li-Kim-Moy | 2016 | trivalent inactivated (subunit or split) IM    | 57  | <5 years            | healthy subjects            | outpatients | industry+government/ private no profit | Oceania         | Sydney, Australia                                                                                                                    | multi center  |
|     |            |      | hepatitis A vaccine                            | 67  |                     |                             |             |                                        |                 |                                                                                                                                      |               |
| 132 | Lum        | 2010 | trivalent live attenuated nasal spray          | 819 | <5 years            | healthy subjects            | outpatients | not reported                           | Multi-continent | Bangladesh, Belgium, Finland, Germany, Hong Kong, Lithuania, Malaysia, Mexico, Philippines, Poland, Singapore, South Korea, Thailand | multi center  |
|     |            |      | placebo                                        | 414 |                     |                             |             |                                        |                 |                                                                                                                                      |               |
| 135 | Madhi      | 2011 | trivalent inactivated IM                       | 255 | 18 -60 years        | imunodepression (any cause) | outpatients | government/ private no profit          | Africa          | South Africa                                                                                                                         | single center |
|     |            |      | placebo                                        | 251 |                     |                             |             |                                        |                 |                                                                                                                                      |               |
| 134 | Madhi      | 2013 | trivalent inactivated IM                       | 206 | mixed aged children | imunodepression (any cause) | outpatients | government/ private no profit          | Africa          | South Africa                                                                                                                         | single center |
|     |            |      | placebo                                        | 204 |                     |                             |             |                                        |                 |                                                                                                                                      |               |

|     |                        |      |                                                    |      |                     |                                              |             |                               |               |              |               |
|-----|------------------------|------|----------------------------------------------------|------|---------------------|----------------------------------------------|-------------|-------------------------------|---------------|--------------|---------------|
| 133 | Madhi cohort 1         | 2014 | trivalent inactivated IM                           | 1062 | 18 -60 years        | pregnant women                               | outpatients | government/ private no profit | Africa        | South Africa | single center |
|     |                        |      | placebo                                            | 1054 |                     |                                              |             |                               |               |              |               |
|     | Madhi cohort b         | 2014 | trivalent inactivated) IM                          | 100  | 18 -60 years        | pregnant women+imunodepression (any cause)   | outpatients | government/ private no profit |               |              |               |
|     |                        |      | placebo                                            | 94   |                     |                                              |             |                               |               |              |               |
| 136 | Magnani                | 2005 | trivalent inactivated IM                           | 21   | adult and elderly   | imunodepression (any cause)                  | outpatients | not reported                  | Europe        | Italy        | single center |
|     |                        |      | trivalent inactivated adjuvanted MF59/AS03 IM      | 21   |                     |                                              |             |                               |               |              |               |
|     |                        |      | no vaccine                                         | 16   |                     |                                              |             |                               |               |              |               |
| 138 | Mallory (only study 2) | 2018 | quadrivalent live attenuated nasal spray           | 868  | mixed aged children | healthy subjects+chronic respiratory disease | outpatients | industry                      | Asia          | Japan        | multi center  |
|     |                        |      | placebo/no intervention                            | 433  |                     |                                              |             |                               |               |              |               |
| 137 | Mallory                | 2020 | trivalent live attenuated nasal spray              | 67   | <5 years            | healthy subjects                             | outpatients | industry                      | North America | USA          | multi center  |
|     |                        |      | quadrivalent live attenuated nasal spray           | 133  |                     |                                              |             |                               |               |              |               |
| 139 | Marchisio              | 2009 | trivalent inactivated adjuvanted virosome/liposome | 90   | <5 years            | healthy subjects                             | outpatients | government/ private no profit | Europe        | Italy        | not reported  |
|     |                        |      | placebo                                            | 90   |                     |                                              |             |                               |               |              |               |

|     |                  |      |                                                        |       |              |                             |             |                               |                 |                                                                                                                                                                             |               |
|-----|------------------|------|--------------------------------------------------------|-------|--------------|-----------------------------|-------------|-------------------------------|-----------------|-----------------------------------------------------------------------------------------------------------------------------------------------------------------------------|---------------|
| 140 | McBride cohort 1 | 2016 | trivalent inactivated IM                               | 5032  | 18 -60 years | healthy subjects            | outpatients | industry                      | Oceania         | Australia ,<br>New Zealand                                                                                                                                                  | multi center  |
|     |                  |      | placebo                                                | 2512  |              |                             |             |                               |                 |                                                                                                                                                                             |               |
|     | McBride cohort 2 | 2016 | trivalent inactivated IM                               | 5001  | 18 -60 years | healthy subjects            | outpatients | industry                      |                 |                                                                                                                                                                             |               |
|     |                  |      | placebo                                                | 2499  |              |                             |             |                               |                 |                                                                                                                                                                             |               |
| 141 | McElhane         | 2013 | trivalent inactivated IM                               | 21802 | ≥61 years    | healthy subjects            | outpatients | industry                      | Multi-continent | Belgium,<br>Canada,<br>Czech Republic,<br>Estonia,<br>France,<br>Germany,<br>Mexico,<br>Norway,<br>Poland,<br>Romania,<br>Russia,<br>Taiwan, the<br>Netherlands,<br>UK, USA | multi center  |
|     |                  |      | trivalent inactivated adjuvanted MF59/AS03 IM          | 21893 |              | healthy subjects            | outpatients | industry                      |                 |                                                                                                                                                                             |               |
| 142 | McKittrick       | 2013 | trivalent inactivated IM                               | 98    | 18 -60 years | imunodepression (any cause) | outpatients | government/ private no profit | North America   | USA                                                                                                                                                                         | single center |
|     |                  |      | trivalent inactivated high doses IM                    | 100   |              |                             |             |                               |                 |                                                                                                                                                                             |               |
| 143 | McManus          | 2014 | trivalent inactivated IM                               | 16    | 6-17 years   | cancer                      | outpatients | government/ private no profit | North America   | USA                                                                                                                                                                         | single center |
|     |                  |      | trivalent inactivated high doses (subunit or split) IM | 34    |              |                             |             |                               |                 |                                                                                                                                                                             |               |

|     |             |      |                                               |     |              |                             |             |                               |               |          |               |
|-----|-------------|------|-----------------------------------------------|-----|--------------|-----------------------------|-------------|-------------------------------|---------------|----------|---------------|
| 144 | Mesa -Duque | 2001 | trivalent inactivated IM                      | 247 | 18 -60 years | healthy subjects            | outpatients | not reported                  | South America | Colombia | not reported  |
|     |             |      | placebo                                       | 246 |              |                             |             |                               |               |          |               |
| 145 | Minutello   | 1999 | trivalent inactivated IM                      | 46  | ≥61 years    | healthy subjects            | outpatients | not reported                  | Europe        | Italy    | single center |
|     |             |      | trivalent inactivated adjuvanted MF59/AS03 IM | 46  |              |                             |             |                               |               |          |               |
| 146 | Mixeu       | 2002 | trivalent inactivated IM                      | 405 | 18 -60 years | healthy subjects            | outpatients | industry                      | South America | Brazil   | single center |
|     |             |      | placebo                                       | 408 |              |                             |             |                               |               |          |               |
| 147 | Miyazaki    | 1993 | trivalent live attenuated nasal spray         | 19  | 6-17 years   | chronic respiratory disease | inpatients  | government/ private no profit | Asia          | Japan    | single center |
|     |             |      | no vaccine                                    | 20  |              |                             |             |                               |               |          |               |
| 148 | Monto       | 2009 | trivalent inactivated IM                      | 814 | 18 -60 years | healthy subjects            | outpatients | government/ private no profit | North America | USA      | single center |
|     |             |      | trivalent live attenuated nasal spray         | 813 |              |                             |             |                               |               |          |               |
|     |             |      | placebo                                       | 325 |              |                             |             |                               |               |          |               |
| 149 | Morelon     | 2010 | trivalent inactivated IM                      | 31  | 18 -60 years | imunodepression (any cause) | outpatients | industry                      | Europe        | France   | multi center  |
|     |             |      | trivalent inactivated intradermal             | 31  |              |                             |             |                               |               |          |               |
| 150 | Musto       | 1997 | trivalent inactivated IM                      | 25  | 18 -60 years | cancer                      | outpatients | not reported                  | Europe        | Italy    | single center |
|     |             |      | no vaccine                                    | 25  |              |                             |             |                               |               |          |               |

|     |          |      |                                                |      |                   |                             |             |                               |                 |                                                        |               |
|-----|----------|------|------------------------------------------------|------|-------------------|-----------------------------|-------------|-------------------------------|-----------------|--------------------------------------------------------|---------------|
| 152 | Natori a | 2017 | trivalent inactivated adjuvanted MF59/AS03 IM  | 35   | adult and elderly | imunodepression (any cause) | outpatients | industry                      | not reported    | not reported                                           | not reported  |
|     |          |      | trivalent inactivated IM                       | 38   |                   |                             |             |                               |                 |                                                        |               |
| 153 | Natori b | 2017 | trivalent inactivated IM                       | 85   | 18 -60 years      | imunodepression (any cause) | outpatients | government/ private no profit | not reported    | not reported                                           | not reported  |
|     |          |      | trivalent inactivated highIM                   | 87   |                   |                             |             |                               |                 |                                                        |               |
| 155 | Nichol   | 1999 | trivalent live attenuated nasal spray          | 3041 | 18 -60 years      | healthy subjects            | outpatients | industry                      | North America   | USA                                                    | multi center  |
|     |          |      | placebo                                        | 1520 |                   |                             |             |                               |                 |                                                        |               |
| 154 | Nichol   | 1995 | trivalent inactivated IM                       | 424  | 18 -60 years      | healthy subjects            | outpatients | government/ private no profit | North America   | USA                                                    | not reported  |
|     |          |      | placebo                                        | 425  |                   | healthy subjects            | outpatients | government/ private no profit |                 |                                                        |               |
| 156 | Noh      | 2019 | quadrivalent inactivated high doses IM         | 30   | 18 -60 years      | healthy subjects            | outpatients | industry                      | Asia            | KOREA                                                  | single center |
|     |          |      | quadrivalent inactivated (subunit or split) IM | 10   |                   |                             |             |                               |                 |                                                        |               |
| 157 | Nolan    | 2014 | trivalent inactivated IM                       | 2964 | <5 years          | healthy subjects            | outpatients | industry                      | Multi-continent | Argentina, Australia, Chile, Philippines, South Africa | multi center  |
|     |          |      | trivalent inactivated adjuvanted MF59/AS03 IM  | 3136 |                   |                             |             |                               |                 |                                                        |               |

|     |         |      |                                                |      |                   |                             |             |                               |                 |                                 |               |
|-----|---------|------|------------------------------------------------|------|-------------------|-----------------------------|-------------|-------------------------------|-----------------|---------------------------------|---------------|
| 159 | Ohmit   | 2008 | trivalent inactivated IM                       | 818  | 18 -60 years      | healthy subjects            | outpatients | government/ private no profit | North America   | USA                             | multi center  |
|     |         |      | placebo                                        | 338  |                   |                             |             |                               |                 |                                 |               |
|     |         |      | trivalent live attenuated nasal spray          | 787  |                   |                             |             |                               |                 |                                 |               |
| 158 | Ohmit   | 2006 | trivalent inactivated IM                       | 522  | 18 -60 years      | healthy subjects            | outpatients | government/ private no profit | North America   | USA                             | multi center  |
|     |         |      | placebo                                        | 206  |                   |                             |             |                               |                 |                                 |               |
|     |         |      | trivalent live attenuated nasal spray          | 519  |                   |                             |             |                               |                 |                                 |               |
| 160 | Ortiz   | 2015 | trivalent live attenuated nasal spray          | 150  | <5 years          | healthy subjects            | outpatients | government/ private no profit | Africa          | Bangladesh                      | single center |
|     |         |      | placebo                                        | 150  |                   |                             |             |                               |                 |                                 |               |
| 161 | Pedroza | 2009 | trivalent inactivated) IM                      | 132  | 6-17 years        | chronic respiratory disease | outpatients | industry                      | South America   | Mexico                          | single center |
|     |         |      | placebo                                        | 31   |                   |                             |             |                               |                 |                                 |               |
| 162 | Pepin   | 2013 | trivalent inactivated IM                       | 449  | adult and elderly | healthy subjects            | outpatients | industry                      | Europe          | France, Germany                 | multi center  |
|     |         |      | quadrivalent inactivated (subunit or split) IM | 1116 |                   |                             |             |                               |                 |                                 |               |
| 164 | Pepin   | 2016 | trivalent inactivated IM                       | 355  | <5 years          | healthy subjects            | outpatients | industry                      | Multi-continent | Poland, Finland, Mexico, Taiwan | multi center  |
|     |         |      | quadrivalent inactivated IM                    | 887  |                   |                             |             |                               |                 |                                 |               |

|     |            |      |                                                    |      |              |                             |                           |              |                 |                                         |              |
|-----|------------|------|----------------------------------------------------|------|--------------|-----------------------------|---------------------------|--------------|-----------------|-----------------------------------------|--------------|
| 163 | Pepin      | 2019 | quadrivalent inactivated (subunit or split) IM     | 2721 | <5 years     | healthy subjects            | outpatients               | industry     | Multi continent | Asia, Latin America, Europe, and Africa | multi center |
|     |            |      | placebo/no intervention                            | 2715 |              |                             |                           |              |                 |                                         |              |
|     |            |      | trivalent inactivated (subunit or split) IM        | 369  |              |                             |                           |              |                 |                                         |              |
| 165 | Powers     | 1995 | trivalent inactivated recombinant                  | 77   | 18 -60 years | healthy subjects            | outpatients               | not reported | North America   | USA                                     | multi center |
|     |            |      | trivalent inactivated IM                           | 26   |              |                             |                           |              |                 |                                         |              |
|     |            |      | placebo                                            | 24   |              |                             |                           |              |                 |                                         |              |
| 166 | Pregliasco | 2001 | trivalent inactivated IM                           | 213  | ≥61 years    | nr                          | long term care facilities | not reported | Europe          | Italy                                   | multi center |
|     |            |      | trivalent inactivated adjuvanted MF59/AS03 IM      | 207  |              |                             |                           |              |                 |                                         |              |
|     |            |      | trivalent inactivated adjuvanted virosome/liposome | 215  |              |                             |                           |              |                 |                                         |              |
| 168 | Redding    | 2002 | trivalent live attenuated nasal spray              | 24   | 6-17 years   | chronic respiratory disease | outpatients               | industry     | North America   | USA                                     | multi center |
|     |            |      | placebo                                            | 24   |              |                             |                           |              |                 |                                         |              |
| 169 | Reid       | 1998 | trivalent inactivated IM                           | 17   | 18 -60 years | chronic respiratory disease | outpatients               | not reported | not reported    | not reported                            | not reported |
|     |            |      | placebo                                            | 5    |              |                             |                           |              |                 |                                         |              |

|     |                 |      |                                                    |      |                   |                  |                           |                               |               |            |               |
|-----|-----------------|------|----------------------------------------------------|------|-------------------|------------------|---------------------------|-------------------------------|---------------|------------|---------------|
| 170 | Rodriguez Weber | 2014 | trivalent inactivated IM                           | 301  | <5 years          | healthy subjects | outpatients               | industry                      | South America | Mexico     | multi center  |
|     |                 |      | quadrivalent inactivated IM                        | 298  |                   |                  |                           |                               |               |            |               |
| 171 | Rolfes          | 2017 | trivalent inactivated (subunit or split) IM        | 2576 | <5 years          | healthy subjects | outpatients               | government/ private no profit | Asia          | Bangladesh | single center |
|     |                 |      | inactivated polio vaccine (IPV)                    | 2593 |                   |                  |                           |                               |               |            |               |
| 172 | Rouphael        | 2017 | trivalent inactivated IM                           | 25   | 18 -60 years      | healthy subjects | outpatients               | government/ private no profit | North America | USA        | not reported  |
|     |                 |      | trivalent inactivated intradermal                  | 25   |                   |                  |                           |                               |               |            |               |
|     |                 |      | placebo                                            | 25   |                   |                  |                           |                               |               |            |               |
| 173 | Rudenko         | 2001 | trivalent inactivated IM                           | 95   | ≥61 years         | multicomorbidity | long term care facilities | not reported                  | Asia          | Russia     | multi center  |
|     |                 |      | trivalent live attenuated nasal spray              | 114  |                   |                  |                           |                               |               |            |               |
|     |                 |      | placebo                                            | 110  |                   |                  |                           |                               |               |            |               |
| 174 | Ruf             | 2004 | trivalent inactivated IM                           | 273  | adult and elderly | healthy subjects | outpatients               | not reported                  | Europe        | Germany    | multi center  |
|     |                 |      | trivalent inactivated adjuvanted MF59/AS03 IM      | 275  |                   |                  |                           |                               |               |            |               |
|     |                 |      | trivalent inactivated adjuvanted virosome/liposome | 272  |                   |                  |                           |                               |               |            |               |
| 175 | Safdar          | 2006 | trivalent inactivated IM                           | 6    | 18 -60 years      | cancer           | inpatients                | not reported                  | North America | USA        | not reported  |
|     |                 |      | trivalent inactivated recombinant                  | 21   |                   |                  |                           |                               |               |            |               |



|     |              |      |                                                    |     |                     |                             |             |                               |               |             |               |
|-----|--------------|------|----------------------------------------------------|-----|---------------------|-----------------------------|-------------|-------------------------------|---------------|-------------|---------------|
| 176 | Sarkar       | 2020 | trivalent inactivated (subunit or split) IM        | 155 | mixed aged children | healthy subjects            | outpatients | industry                      | Asia          | India       | multi center  |
|     |              |      | quadrivalent inactivated (subunit or split) IM     | 151 |                     |                             |             |                               |               |             |               |
| 177 | Sarsenbayeva | 2018 | trivalent inactivated IM                           | 22  | 18 -60 years        | healthy subjects            | outpatients | not reported                  | Asia          | Kazakhstan  | single center |
|     |              |      | placebo                                            | 22  |                     |                             |             |                               |               |             |               |
| 178 | Saxen        | 1999 | trivalent inactivated IM                           | 216 | 18 -60 years        | healthy subjects            | outpatients | not reported                  | Europe        | Finland     | multi center  |
|     |              |      | placebo                                            | 211 |                     |                             |             |                               |               |             |               |
| 179 | Schaad       | 2000 | trivalent inactivated IM                           | 21  | mixed aged children | chronic respiratory disease | outpatients | not reported                  | Europe        | Switzerland | multi center  |
|     |              |      | trivalent inactivated adjuvanted virosome/liposome | 43  |                     |                             |             |                               |               |             |               |
| 180 | Scheifele    | 2013 | trivalent inactivated IM                           | 310 | ≥61 years           | healthy subjects            | outpatients | government/ private no profit | North America | Canada      | multi center  |
|     |              |      | trivalent inactivated intradermal                  | 306 |                     |                             |             |                               |               |             |               |
|     |              |      | trivalent inactivated adjuvanted virosome/liposome | 306 |                     |                             |             |                               |               |             |               |
| 182 | Seo          | 2014 | trivalent inactivated) IM                          | 113 | ≥61 years           | healthy subjects            | outpatients | government/ private no profit | Asia          | South Korea | multi center  |
|     |              |      | trivalent inactivated intradermal                  | 111 |                     |                             |             |                               |               |             |               |
|     |              |      | trivalent inactivated adjuvanted virosome/liposome | 111 |                     |                             |             |                               |               |             |               |

|     |         |      |                                                                  |      |                    |                              |                           |                                       |               |                   |               |
|-----|---------|------|------------------------------------------------------------------|------|--------------------|------------------------------|---------------------------|---------------------------------------|---------------|-------------------|---------------|
| 181 | Seo     | 2016 | trivalent inactivated IM                                         | 28   | 18 -60 years       | immunodepression (any cause) | outpatients               | not reported                          | Asia          | Republic of Korea | multi center  |
|     |         |      | trivalent inactivated intradermal                                | 58   |                    |                              |                           |                                       |               |                   |               |
| 184 | Sharma  | 2018 | trivalent inactivated (subunit or split) IM                      | 174  | adult and elderly  | healthy subjects             | long term care facilities | industry                              | Asia          | India             | multi center  |
|     |         |      | quadrivalent inactivated (subunit or split) IM                   | 176  | adult and elderly  |                              |                           |                                       |               |                   |               |
| 185 | Sheldon | 2013 | trivalent live attenuated nasal spray                            | 598  | 18 -60 years       | healthy subjects             | outpatients               | industry                              | North America | USA               | multi center  |
|     |         |      | quadrivalent live attenuated nasal spray                         | 1202 |                    |                              |                           |                                       |               |                   |               |
| 186 | Sindoni | 2009 | trivalent inactivated adjuvanted (subunit or split) MF59/AS03 IM | 96   | 61 years and older | multicomorbidity             | long term care facilities | not reported                          | Europe        | Italy             | single center |
|     |         |      | trivalent inactivated (subunit or split) IM                      | 99   | 61 years and older | multicomorbidity             | long term care facilities | not reported                          |               |                   |               |
| 188 | Solares | 2014 | trivalent inactivated IM                                         | 180  | <5 years           | healthy subjects             | outpatients               | industry                              | South America | Guatemala         | multi center  |
|     |         |      | trivalent inactivated adjuvanted (subunit or split) MF59/AS03 IM | 180  |                    |                              |                           |                                       |               |                   |               |
| 189 | Song    | 2007 | trivalent inactivated (subunit or split) IM                      | 198  | adult and elderly  | multicomorbidity             | outpatients               | not reported                          | Asia          | Seoul, Korea      | single center |
|     |         |      | placebo/no intervention                                          | 113  | adult and elderly  |                              |                           |                                       |               |                   |               |
| 190 | Song    | 2019 | quadrivalent inactivated (subunit or split) IM                   | 648  | adult and elderly  | healthy subjects             | outpatients               | industry+government/private no profit | Asia          | South Korea       | multi center  |
|     |         |      | trivalent inactivated (subunit or split) IM                      | 651  |                    |                              |                           |                                       |               |                   |               |

|     |                    |      |                                                                  |      |                     |                              |             |                               |              |              |               |
|-----|--------------------|------|------------------------------------------------------------------|------|---------------------|------------------------------|-------------|-------------------------------|--------------|--------------|---------------|
| 192 | Squarcione         | 2003 | trivalent inactivated (subunit or split) IM                      | 1076 | 61 years and older  | healthy subjects             | outpatients | not reported                  | Europe       | Italy        | single center |
|     |                    |      | trivalent inactivated adjuvanted (subunit or split) MF59/AS03 IM | 1074 | 61 years and older  |                              |             |                               |              |              |               |
| 194 | Steinhoff cohort 1 | 2017 | trivalent inactivated IM                                         | 1049 | 18 -60 years        | pregnant women               | outpatients | government/ private no profit | Asia         | Nepal        | multi center  |
|     |                    |      | placebo                                                          | 1041 |                     |                              |             |                               |              |              |               |
|     | Steinhoff cohort b | 2017 | trivalent inactivated) IM                                        | 798  | 18 -60 years        |                              |             |                               |              |              |               |
|     |                    |      | placebo                                                          | 805  |                     |                              |             |                               |              |              |               |
| 195 | Stevanovic         | 2017 | trivalent inactivated IM                                         | 30   | 18 -60 years        | healthy subjects             | outpatients | government/ private no profit | Europe       | Serbia       | single center |
|     |                    |      | placebo                                                          | 30   |                     |                              |             |                               |              |              |               |
| 196 | Stevanovic         | 2020 | trivalent inactivated (subunit or split) IM                      | 320  | 18 -60 years        | healthy subjects             | outpatients | government/ private no profit | Asia         | Serbia       | multi center  |
|     |                    |      | placebo/no intervention                                          | 160  |                     |                              |             |                               |              |              |               |
| 197 | Strijbos           | 2019 | trivalent inactivated (subunit or split) IM                      | 24   | adult and elderly   | immunodepression (any cause) | outpatients | government/ private no profit | Europe       | Netherlands  | single center |
|     |                    |      | placebo/no intervention                                          | 23   |                     |                              |             |                               |              |              |               |
| 198 | Swierkosz          | 1994 | trivalent live attenuated nasal spray                            | 17   | mixed aged children | healthy subjects             | outpatients | not reported                  | not reported | not reported | not reported  |
|     |                    |      | placebo                                                          | 5    |                     |                              |             |                               |              |              |               |

|     |              |      |                                             |      |                     |                             |             |                               |                 |                                                                             |               |
|-----|--------------|------|---------------------------------------------|------|---------------------|-----------------------------|-------------|-------------------------------|-----------------|-----------------------------------------------------------------------------|---------------|
| 199 | Tam cohort 1 | 2007 | trivalent live attenuated nasal spray       | 1900 | mixed aged children | healthy subjects            | outpatients | industry                      | Multi-continent | China, Hong Kong, India, Malaysia, Philippines, Singapore, Taiwan, Thailand | multi center  |
|     |              |      | placebo                                     | 1274 |                     |                             |             |                               |                 |                                                                             |               |
|     | Tam cohort b | 2007 | trivalent live attenuated nasal spray       | 1477 |                     |                             |             |                               |                 |                                                                             |               |
|     |              |      | placebo                                     | 1470 |                     |                             |             |                               |                 |                                                                             |               |
| 200 | Tanaka       | 1993 | trivalent live attenuated nasal spray       | 20   | mixed aged children | chronic respiratory disease | inpatients  | government/ private no profit | not reported    | not reported                                                                | not reported  |
|     |              |      | placebo                                     | 25   |                     |                             |             |                               |                 |                                                                             |               |
| 201 | Tapia        | 2016 | trivalent inactivated (subunit or split) IM | 2108 | 18 -60 years        | pregnant women              | outpatients | government/ private no profit | Africa          | Mali                                                                        | multi center  |
|     |              |      | meningococcal vaccine                       | 2085 | 18 -60 years        | pregnant women              | outpatients | government/ private no profit |                 |                                                                             |               |
| 202 | Tasker       | 1999 | trivalent inactivated IM                    | 55   | 18 -60 years        | imunodepression (any cause) | outpatients | not reported                  | North America   | USA                                                                         | single center |
|     |              |      | placebo                                     | 47   |                     |                             |             |                               |                 |                                                                             |               |
| 203 | Tinoco       | 2014 | trivalent inactivated IM                    | 431  | adult and elderly   | healthy subjects            | outpatients | industry                      | Multi-continent | Canada, Mexico, USA                                                         | multi center  |
|     |              |      | quadrivalent inactivated IM                 | 1272 |                     |                             |             |                               |                 |                                                                             |               |
| 204 | Treanor      | 1994 | trivalent inactivated IM                    | 30   | ≥61 years           | multicomorbidity            | outpatients | government/ private no profit | North America   | USA                                                                         | multi center  |
|     |              |      | placebo                                     | 11   |                     |                             |             |                               |                 |                                                                             |               |

|     |                  |      |                                       |      |              |                  |             |                               |               |     |              |
|-----|------------------|------|---------------------------------------|------|--------------|------------------|-------------|-------------------------------|---------------|-----|--------------|
| 206 | Treanor          | 2011 | trivalent inactivated recombinant     | 2344 | 18 -60 years | healthy subjects | outpatients | industry                      | North America | USA | multi center |
|     |                  |      | placebo                               | 2304 |              |                  |             |                               |               |     |              |
| 207 | Treanor          | 2000 | trivalent inactivated IM              | 33   | 18 -60 years | healthy subjects | outpatients | government/ private no profit | North America | USA | multi center |
|     |                  |      | trivalent live attenuated nasal spray | 36   |              |                  |             |                               |               |     |              |
|     |                  |      | placebo                               | 34   |              |                  |             |                               |               |     |              |
| 205 | Treanor          | 2005 | trivalent inactivated IM              | 763  | 18 -60 years | healthy subjects | outpatients | government/ private no profit | North America | USA | multi center |
|     |                  |      | placebo                               | 193  |              |                  |             |                               |               |     |              |
| 208 | Treanor          | 2007 | trivalent inactivated recombinant     | 306  | 18 -60 years | healthy subjects | outpatients | industry                      | North America | USA | multi center |
|     |                  |      | placebo                               | 154  |              |                  |             |                               |               |     |              |
| 209 | Treanor cohort 1 | 2017 | trivalent inactivated IM              | 871  | 18 -60 years | healthy subjects | outpatients | industry                      | North America | USA | multi center |
|     |                  |      | quadrivalent inactivated IM           | 870  |              |                  |             |                               |               |     |              |
|     | Treanor cohort 2 | 2017 | trivalent inactivated IM              | 871  | ≥61 years    | healthy subjects | outpatients |                               |               |     |              |
|     |                  |      | quadrivalent inactivated IM           | 870  |              |                  |             |                               |               |     |              |
| 210 | Tsang            | 2014 | trivalent inactivated IM              | 319  | ≥61 years    | healthy subjects | outpatients | government/ private no profit | North America | USA | multi center |
|     |                  |      | trivalent inactivated high doses IM   | 320  |              |                  |             |                               |               |     |              |
|     |                  |      | trivalent inactivated intradermal     | 637  |              |                  |             |                               |               |     |              |

|     |              |      |                                                        |      |                    |                  |             |                                       |               |                                                 |              |
|-----|--------------|------|--------------------------------------------------------|------|--------------------|------------------|-------------|---------------------------------------|---------------|-------------------------------------------------|--------------|
| 211 | Van Damme    | 2010 | trivalent inactivated intradermal                      | 398  | ≥61 years          | multicomorbidity | outpatients | not reported                          | Europe        | Belgium, France                                 | multi center |
|     |              |      | trivalent inactivated adjuvanted MF59/AS03 IM          | 397  |                    |                  |             |                                       |               |                                                 |              |
| 212 | Van de Witte | 2018 | quadrivalent inactivated (subunit or split) IM         | 769  | 18 -60 years       | healthy subjects | outpatients | industry                              | Europe        | Belgium, Germany, Hungary, Latvia and Lithuania | multi center |
|     |              |      | trivalent inactivated (subunit or split) IM            | 222  | 18 -60 years       |                  |             |                                       |               |                                                 |              |
|     |              |      | quadrivalent inactivated (subunit or split) IM         | 769  | 61 years and older |                  |             |                                       |               |                                                 |              |
|     |              |      | trivalent inactivated (subunit or split) IM            | 220  | 61 years and older |                  |             |                                       |               |                                                 |              |
| 213 | Vardeny      | 2020 | trivalent inactivated high doses (subunit or split) IM | 2630 | 61 years and older | multicomorbidity | inpatients  | industry+government/private no profit | North America | US and Canada                                   | multi center |
|     |              |      | quadrivalent inactivated (subunit or split) IM         | 2630 | 61 years and older |                  |             |                                       |               |                                                 |              |
| 216 | Vesikari     | 2008 | trivalent live attenuated nasal spray                  | 61   | <5 years           | healthy subjects | outpatients | industry                              | Europe        | Finland                                         | multi center |
|     |              |      | placebo                                                | 59   |                    |                  |             |                                       |               |                                                 |              |
| 219 | Vesikari     | 2009 | trivalent inactivated IM                               | 139  | <5 years           | healthy subjects | outpatients | industry                              | Europe        | Finland                                         | not reported |
|     |              |      | trivalent inactivated adjuvante MF59/AS03 IM           | 130  |                    |                  |             |                                       |               |                                                 |              |

|     |                   |      |                                                                  |      |                     |                  |             |          |                 |                                                           |              |
|-----|-------------------|------|------------------------------------------------------------------|------|---------------------|------------------|-------------|----------|-----------------|-----------------------------------------------------------|--------------|
| 217 | Vesikari          | 2011 | trivalent inactivated IM                                         | 1773 | <5 years            | healthy subjects | outpatients | industry | Europe          | Germany, Finland                                          | multi center |
|     |                   |      | trivalent inactivated adjuvanted (subunit or split) MF59/AS03 IM | 1941 |                     |                  |             |          |                 |                                                           |              |
| 214 | Vesikari cohort 1 | 2006 | trivalent live attenuated nasal spray                            | 1059 | <5 years            | healthy subjects | outpatients | industry | Multi-continent | Belgium, Finland, Israel, Spain, UK                       | multi center |
|     |                   |      | placebo                                                          | 725  |                     |                  |             |          |                 |                                                           |              |
|     | Vesikari cohort 2 | 2006 | trivalent live attenuated nasal spray                            | 658  | <5 years            | healthy subjects | outpatients |          |                 |                                                           |              |
|     |                   |      | placebo                                                          | 461  |                     |                  |             |          |                 |                                                           |              |
| 215 | Vesikari b        | 2006 | trivalent live attenuated nasal spray                            | 98   | <5 years            | healthy subjects | outpatients | industry | Europe          | Finland                                                   | multi center |
|     |                   |      | placebo                                                          | 99   |                     |                  |             |          |                 |                                                           |              |
| 220 | Vesikari b        | 2020 | quadrivalent inactivated (subunit or split) IM                   | 230  | 18 -60 years        | pregnant women   | outpatients | industry | Europe          | Finland                                                   | multi center |
|     |                   |      | trivalent inactivated (subunit or split) IM                      | 116  | 18 -60 years        |                  |             |          |                 |                                                           |              |
| 218 | Vesikari a        | 2020 | quadrivalent inactivated (subunit or split) IM                   | 402  | mixed aged children | healthy subjects | outpatients | industry | Europe          | Estonia, Finland, Germany, Hungary, Lithuania, and Poland | multi center |
|     |                   |      | trivalent inactivated (subunit or split) IM                      | 798  | mixed aged children |                  |             |          |                 |                                                           |              |

|     |               |      |                                                        |      |                     |                  |             |                               |               |         |               |
|-----|---------------|------|--------------------------------------------------------|------|---------------------|------------------|-------------|-------------------------------|---------------|---------|---------------|
| 221 | Victor        | 2016 | trivalent live attenuated nasal spray                  | 1174 | <5 years            | healthy subjects | outpatients | government/ private no profit | Africa        | Senegal | single center |
|     |               |      | placebo                                                | 587  |                     |                  |             |                               |               |         |               |
| 222 | Volling       | 2019 | trivalent inactivated high doses (subunit or split) IM | 87   | 18 -60 years        | healthy subjects | outpatients | industry                      | North America | Canada  | single center |
|     |               |      | trivalent inactivated (subunit or split) IM            | 83   | 18 -60 years        |                  |             |                               |               |         |               |
| 223 | Wang          | 2015 | trivalent inactivated IM                               | 156  | <5 years            | healthy subjects | outpatients | industry                      | North America | USA     | multi center  |
|     |               |      | quadrivalent inactivated IM                            | 158  |                     |                  |             |                               |               |         |               |
| 224 | Wang cohort 1 | 2017 | trivalent inactivated IM                               | 916  | mixed aged children | healthy subjects | outpatients | industry                      | Asia          | China   | single center |
|     |               |      | quadrivalent inactivated IM                            | 913  |                     |                  |             |                               |               |         |               |
|     | Wang cohort 2 | 2017 | trivalent inactivated IM                               | 460  | 18 -60 years        | healthy subjects | outpatients | industry                      |               |         |               |
|     |               |      | quadrivalent inactivated IM                            | 458  |                     |                  |             |                               |               |         |               |
|     | Wang cohort 3 | 2017 | trivalent inactivated IM                               | 456  | ≥61 years           | healthy subjects | outpatients | industry                      |               |         |               |
|     |               |      | quadrivalent inactivated IM                            | 458  |                     |                  |             |                               |               |         |               |
| 225 | Wang          | 2020 | trivalent live attenuated nasal spray                  | 1000 | mixed aged children | healthy subjects | outpatients | industry                      | Asia          | China   | multi center  |
|     |               |      | placebo/no intervention                                | 1000 | mixed aged children |                  |             |                               |               |         |               |



|     |                 |      |                                                |      |                    |                             |             |                                        |                 |                                 |               |
|-----|-----------------|------|------------------------------------------------|------|--------------------|-----------------------------|-------------|----------------------------------------|-----------------|---------------------------------|---------------|
| 226 | Ward b          | 2020 | quadrivalent inactivated recombinant           | 5077 | 18 -60 years       | healthy subjects            | outpatients | industry                               | Multi continent | Asia, Europe, and North America | multi center  |
|     |                 |      | placebo/no intervention                        | 5083 | 18 -60 years       |                             |             |                                        |                 |                                 |               |
|     |                 |      | quadrivalent inactivated recombinant           | 6396 | 61 years and older |                             |             |                                        |                 |                                 |               |
|     |                 |      | quadrivalent inactivated (subunit or split) IM | 6398 | 61 years and older |                             |             |                                        |                 |                                 |               |
| 227 | Weingarten 1988 | 1988 | trivalent inactivated (subunit or split) IM    | 91   | 18 -60 years       | healthy subjects            | outpatients | not reported                           | North America   | USA                             | single center |
|     |                 |      | placebo/no intervention                        | 88   | 18 -60 years       |                             |             |                                        |                 |                                 |               |
| 228 | Wilde cohort 1  | 1999 | trivalent inactivated (subunit or split) IM    | 52   | 18 -60 years       | healthy subjects            | outpatients | industry+government/ private no profit | North America   | USA                             | multi center  |
|     | cohort 1        |      | meningococcal vaccine                          | 50   | 18 -60 years       |                             |             |                                        |                 |                                 |               |
|     | cohort 2        |      | trivalent inactivated (subunit or split) IM    | 51   | 18 -60 years       |                             |             |                                        |                 |                                 |               |
|     | cohort 2        |      | pneumococcal vaccine                           | 52   | 18 -60 years       |                             |             |                                        |                 |                                 |               |
|     | cohort 3        |      | trivalent inactivated (subunit or split) IM    | 78   | 18 -60 years       |                             |             |                                        |                 |                                 |               |
|     | cohort 3        |      | placebo/no intervention                        | 78   | 18 -60 years       |                             |             |                                        |                 |                                 |               |
| 229 | Wongsurakiat    | 2004 | trivalent inactivated IM                       | 62   | adult and elderly  | chronic respiratory disease | outpatients | government/ private no profit          | Asia            | Thailand                        | single center |
|     |                 |      | placebo                                        | 63   |                    |                             |             |                                        |                 |                                 |               |

|                                                                                                                         |               |      |                                                |        |                                        |                             |             |                               |              |                  |              |
|-------------------------------------------------------------------------------------------------------------------------|---------------|------|------------------------------------------------|--------|----------------------------------------|-----------------------------|-------------|-------------------------------|--------------|------------------|--------------|
| 230                                                                                                                     | Zaman         | 2018 | trivalent inactivated (subunit or split) IM    | 172    | 18 -60 years                           | pregnant women              | outpatients | government/ private no profit | Asia         | Bangladesh       | not reported |
|                                                                                                                         |               |      | pneumococcal vaccine                           | 168    | 18 -60 years                           |                             |             |                               |              |                  |              |
| 231                                                                                                                     | Zedda         | 2015 | trivalent inactivated IM                       | 41     | <5 years                               | healthy subjects            | outpatients | not reported                  | Europe       | Belgium          | multi center |
|                                                                                                                         |               |      | trivalent inactivated adjuvanted MF59/AS03 IM  | 43     |                                        |                             |             |                               |              |                  |              |
| <b>Studies included in the systematic review but not in the network meta-analyses due to not reporting outcome data</b> |               |      |                                                |        |                                        |                             |             |                               |              |                  |              |
| 60                                                                                                                      | Della Cioppa  | 2011 | 17 study groups                                |        | <5 years                               | healthy subjects            | outpatients | industry                      | Europe       | Finland, Belgium | multi center |
| 46                                                                                                                      | Chu           | 2020 | quadrivalent inactivated (subunit or split) IM | 1160   | mixed aged children; adult and elderly | healthy subjects            | outpatients | not reported                  | Asia         | China            | multi center |
|                                                                                                                         |               |      | trivalent inactivated (subunit or split) IM    | 1160   |                                        |                             |             |                               |              |                  |              |
| 78                                                                                                                      | Fayyaz Jahani | 2012 | trivalent inactivated IM                       | 70     | <5 years                               | chronic respiratory disease | outpatients | not reported                  | not reported | not reported     | not reported |
|                                                                                                                         |               |      | placebo                                        | 70     |                                        |                             |             |                               |              |                  |              |
| 107                                                                                                                     | Izikson       | 2013 | trivalent inactivated recombinant              | 3384   | 18 -60 years                           | healthy subjects            | outpatients | not reported                  | not reported | not reported     | not reported |
|                                                                                                                         |               |      | placebo                                        | 2458   |                                        |                             |             |                               |              |                  |              |
| 126                                                                                                                     | Leung         | 2014 | trivalent inactivated IM                       | 73 tot | 18 -60 years                           | multicomorbidity            | outpatients | not reported                  | not reported | not reported     | not reported |
|                                                                                                                         |               |      | trivalent inactivated intradermal              |        |                                        |                             |             |                               |              |                  |              |

|     |          |      |                                                       |     |                                        |                             |             |                               |               |                                  |              |
|-----|----------|------|-------------------------------------------------------|-----|----------------------------------------|-----------------------------|-------------|-------------------------------|---------------|----------------------------------|--------------|
| 151 | Nace     | 2015 | trivalent inactivated IM                              | 110 | ≥61 years                              | healthy subjects            | outpatients | industry                      | North America | Pennsylvania                     | multi center |
|     |          |      | trivalent inactivated high doses IM                   | 95  |                                        |                             |             |                               |               |                                  |              |
| 167 | Principi | 2003 | trivalent inactivated adjuvanted virosome/liposome    | 202 | <5 years                               | chronic respiratory disease | inpatients  | not reported                  | Europe        | Italy                            | not reported |
|     |          |      | no vaccine                                            | 101 |                                        |                             |             |                               |               |                                  |              |
| 183 | Sesay    | 2018 | quadrivalent inactivated adjuvanted virosome/liposome | 836 | 18 -60 years                           | healthy subjects            | outpatients | industry                      | Europe        | Belgium, France, Germany, Poland | multi center |
|     |          |      | trivalent inactivated IM                              | 278 |                                        |                             |             |                               |               |                                  |              |
|     |          |      | quadrivalent inactivated adjuvanted virosome/liposome | 834 | ≥61 years                              |                             |             |                               |               |                                  |              |
|     |          |      | trivalent inactivated) IM                             | 277 |                                        |                             |             |                               |               |                                  |              |
| 187 | Sleigh   | 2000 | trivalent inactivated IM                              | 19  | 18 -60 years                           | chronic fatigue syndrome    | outpatients | government/ private no profit | not reported  | not reported                     | not reported |
|     |          |      | placebo                                               | 21  |                                        |                             |             |                               |               |                                  |              |
|     |          |      |                                                       |     |                                        |                             |             |                               |               |                                  |              |
| 191 | Souza    | 2010 | trivalent inactivated IM                              | 47  | mixed aged children; adult and elderly | sickle cell disease         | outpatients | government/ private no profit | South America | Brazil                           | Souza        |
|     |          |      | trivalent inactivated adjuvanted virosome/liposome    | 43  |                                        |                             |             |                               |               |                                  |              |

|     |           |      |                                     |    |              |                             |             |                               |               |     |               |
|-----|-----------|------|-------------------------------------|----|--------------|-----------------------------|-------------|-------------------------------|---------------|-----|---------------|
| 193 | Stapleton | 2020 | trivalent inactivated IM            | 25 | 18 -60 years | imunodepression (any cause) | outpatients | government/ private no profit | North America | USA | single center |
|     |           |      | trivalent inactivated high doses IM | 26 |              |                             |             |                               |               |     |               |

### Cochrane risk of bias results across studies

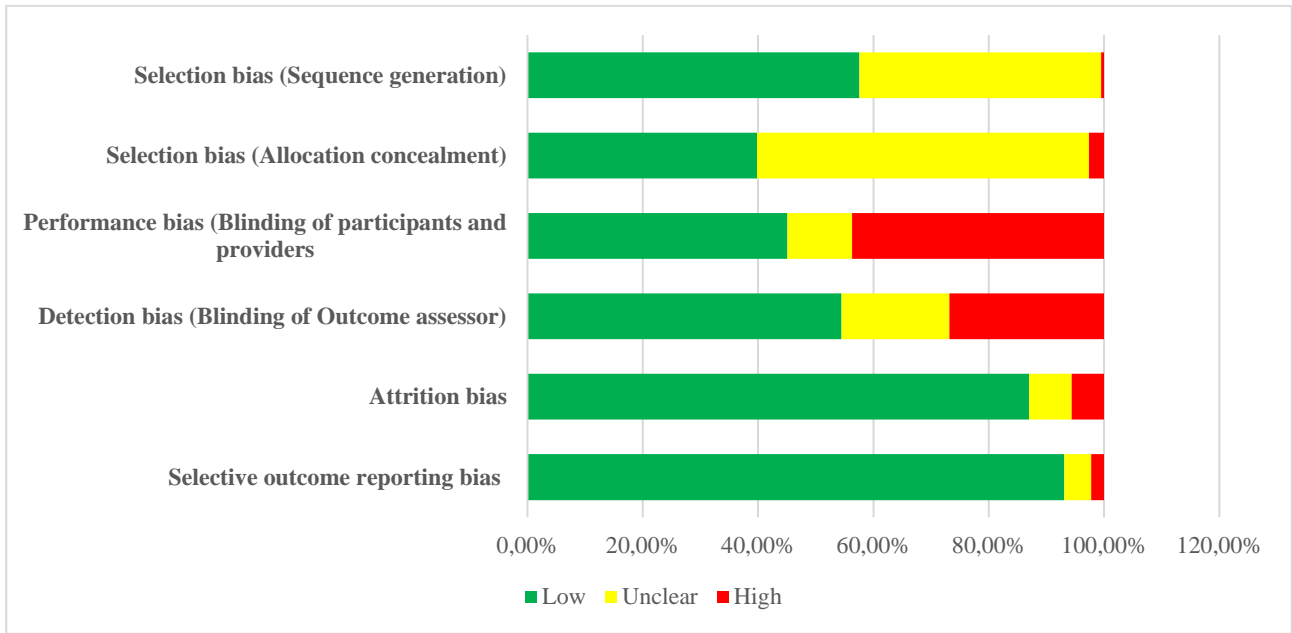

## Cochrane risk of bias in individual studies

| Author-Year       | Selection bias (random sequence generation) | Selection bias (allocation concealment) | Performance bias (blinding of participants and personnel) | Detection bias (blinding of outcome assessor) | Attrition bias | Selective outcome reporting bias |
|-------------------|---------------------------------------------|-----------------------------------------|-----------------------------------------------------------|-----------------------------------------------|----------------|----------------------------------|
| Abadoglu 2004     | Unclear                                     | Unclear                                 | Unclear                                                   | Unclear                                       | Low            | Low                              |
| Allsup 2004       | Low                                         | Low                                     | Low                                                       | Low                                           | Low            | Low                              |
| Anh 2016          | Unclear                                     | Low                                     | Low                                                       | Unclear                                       | Low            | Low                              |
| Ansaldi 2012      | Low                                         | Unclear                                 | High                                                      | High                                          | Low            | Low                              |
| Ansaldi 2013      | Unclear                                     | Unclear                                 | High                                                      | High                                          | Low            | Low                              |
| Arnou 2009        | Low                                         | Low                                     | High                                                      | High                                          | Low            | Low                              |
| Arnou 2010        | Low                                         | Low                                     | High                                                      | High                                          | Low            | Low                              |
| Ashkenazi 2006    | Low                                         | Low                                     | High                                                      | High                                          | Low            | Low                              |
| Auewarakul 2006   | Unclear                                     | Unclear                                 | High                                                      | High                                          | Low            | Low                              |
| Baldo 2007        | Low                                         | Unclear                                 | Low                                                       | Low                                           | Low            | Low                              |
| Baluch 2013       | Low                                         | Low                                     | High                                                      | High                                          | Low            | Low                              |
| Barrett 2011      | Low                                         | Low                                     | Low                                                       | Low                                           | Low            | Low                              |
| Bart 2016         | Low                                         | Low                                     | Low                                                       | Low                                           | Low            | Low                              |
| Baxter 2011       | Unclear                                     | Unclear                                 | High                                                      | High                                          | Low            | Low                              |
| Belongia 2020     | Low                                         | high                                    | high                                                      | High                                          | Low            | High                             |
| Belshe 1992       | Unclear                                     | Unclear                                 | Low                                                       | Low                                           | Low            | Low                              |
| Belshe 1998       | Low                                         | Low                                     | Low                                                       | Low                                           | Low            | Low                              |
| Belshe 2000       | Unclear                                     | Unclear                                 | Low                                                       | Low                                           | Unclear        | Low                              |
| Belshe 2007       | Low                                         | Low                                     | Low                                                       | Low                                           | Low            | Low                              |
| Belshe 2007 b     | Low                                         | Unclear                                 | High                                                      | High                                          | Low            | Low                              |
| Ben-Yehuda 2003   | Unclear                                     | Unclear                                 | Low                                                       | Unclear                                       | Low            | Low                              |
| Ben-Yehuda b 2003 | Unclear                                     | Unclear                                 | Unclear                                                   | Unclear                                       | Low            | Low                              |
| Beran 2009        | Low                                         | Low                                     | Low                                                       | Low                                           | Low            | Low                              |
| Beran 2009 b      | Unclear                                     | Unclear                                 | Low                                                       | Low                                           | Low            | High                             |
| Beran 2009 c      | Low                                         | Low                                     | High                                                      | High                                          | Low            | Low                              |
| Beran 2013        | Low                                         | Low                                     | Low                                                       | Low                                           | Low            | Low                              |
| Bergen 2004       | Unclear                                     | Unclear                                 | Low                                                       | Low                                           | Low            | Low                              |
| Block 2011        | Unclear                                     | Unclear                                 | Low                                                       | Low                                           | Low            | Low                              |
| Block 2012        | Low                                         | Low                                     | Low                                                       | Low                                           | Low            | Low                              |
| Boonnak 2017      | Unclear                                     | Unclear                                 | High                                                      | High                                          | Low            | Low                              |
| Bracco Neto 2009  | Unclear                                     | Unclear                                 | Low                                                       | Low                                           | Low            | Low                              |
| Brady 2018        | unclear                                     | unclear                                 | Low                                                       | low                                           | Low            | Low                              |

|                     |         |         |         |         |         |         |
|---------------------|---------|---------|---------|---------|---------|---------|
| Bridges 2000        | Low     | Low     | Low     | Low     | Low     | Low     |
| Brooks 2016         | Low     | Low     | Low     | Low     | Low     | Low     |
| Bueving 2004        | Low     | Low     | Low     | Low     | Low     | Low     |
| Cadorna-Carlos 2015 | Low     | Low     | High    | High    | Low     | Low     |
| Caldera 2020        | Low     | unclear | Low     | Low     | Low     | Low     |
| Carr 2011           | Low     | Unclear | High    | High    | Low     | Low     |
| Chan 2014           | Low     | Unclear | High    | High    | Low     | Low     |
| Chang 2019          | Low     | Unclear | high    | Low     | Low     | Low     |
| Chi 2010            | Low     | Unclear | High    | High    | Low     | Low     |
| Chiu 2007           | Low     | High    | High    | High    | Low     | Low     |
| Chiu 2009           | Low     | Unclear | High    | High    | Low     | Low     |
| Choi 2017           | Low     | Low     | Low     | Low     | Low     | Low     |
| Choi 2018           | Unclear | Unclear | High    | High    | Low     | Low     |
| Chu 2020            | Low     | Low     | Low     | Low     | Low     | Low     |
| Chuaychoo 2020      | Low     | unclear | high    | High    | unclear | Low     |
| Claeys 2018         | Low     | Low     | high    | Low     | High    | Low     |
| Colmegna 2020l      | Low     | Low     | high    | Low     | Low     | Low     |
| Colombo 2001        | Low     | Unclear | High    | High    | Low     | Low     |
| Couch 2007          | Unclear | High    | High    | Unclear | Low     | Low     |
| Cowling 2010        | Low     | Low     | Low     | Low     | Low     | Low     |
| Cowling 2014        | Low     | Low     | Low     | Low     | Low     | Low     |
| Cowling 2020        | Low     | Low     | high    | Low     | High    | Low     |
| Cruz-Valdez 2017    | Low     | Unclear | High    | High    | Low     | Low     |
| De Bruijn 2006      | Unclear | Unclear | High    | High    | Low     | Low     |
| De Bruijn 2007      | Low     | Unclear | High    | High    | Low     | Low     |
| De Donato 1999      | Unclear | Unclear | High    | Unclear | Unclear | Low     |
| De Villiers 2009    | Low     | Unclear | Low     | Low     | Low     | Low     |
| Della Cioppa 2011   | Unclear | Unclear | Unclear | Unclear | Low     | Low     |
| Desheva 2002        | Unclear | Unclear | Unclear | Unclear | Low     | Unclear |
| Diallo 2018         | Low     | unclear | Low     | Low     | High    | Low     |
| DiazGranados 2013   | Low     | Low     | Low     | Low     | Low     | Low     |
| DiazGranados 2014   | Low     | Low     | Low     | Low     | Low     | Low     |
| DiazGranados 2015   | Low     | Low     | High    | Low     | Low     | Low     |
| Domachowske 2013    | Low     | Low     | Low     | Low     | Low     | Low     |
| Dunkle 2017         | Low     | Low     | Low     | Low     | Low     | Low     |
| Dunkle 2017 b       | Low     | Low     | High    | Low     | Low     | Low     |
| Dunkle 2018         | unclear | high    | high    | Low     | Low     | High    |

|                    |         |         |         |         |         |         |
|--------------------|---------|---------|---------|---------|---------|---------|
| Durando 2008       | Unclear | Unclear | High    | High    | Low     | Low     |
| Englund 2010       | Low     | Low     | Low     | Low     | Low     | Low     |
| Esposito 2010      | Unclear | Unclear | High    | High    | Low     | Low     |
| Esposito 2011      | Low     | Low     | High    | High    | Low     | Low     |
| Esposito 2014      | Low     | Unclear | High    | Unclear | Low     | Low     |
| Essink 2020        | Low     | Low     | Low     | Low     | Low     | Low     |
| Evison 2009        | Low     | Unclear | Low     | Low     | Low     | Low     |
| Falsey 2009        | Low     | Unclear | Low     | Low     | Low     | Low     |
| Fayyaz Jahani 2012 | Unclear | Unclear | Unclear | Unclear | Unclear | Unclear |
| Fleming 2006       | Unclear | Low     | High    | High    | Low     | Low     |
| Forrest 2011       | Unclear | Unclear | High    | High    | Low     | Low     |
| Frenck 2011        | Unclear | Unclear | High    | High    | Low     | Low     |
| Frey 2003          | Unclear | Unclear | High    | Unclear | Low     | Low     |
| Frey 2010          | Unclear | Low     | High    | Low     | Low     | Low     |
| Frey2014           | Unclear | Low     | High    | Unclear | Low     | Low     |
| Gabutti 2005       | Unclear | Unclear | Unclear | Unclear | High    | Low     |
| Gasparini 2001     | Unclear | Unclear | Low     | Low     | Low     | Low     |
| Giaquinta 2014     | Unclear | Unclear | Low     | Low     | Low     | Low     |
| Gorse 2013         | Unclear | Unclear | High    | High    | Low     | Low     |
| Gorse 2013 b       | Low     | Low     | High    | High    | Low     | Low     |
| Gorse 2015         | Unclear | Low     | Low     | Low     | Unclear | Low     |
| Govaert 1993       | Low     | Low     | Low     | Low     | Low     | Low     |
| Greenberg 2013     | Unclear | Low     | High    | High    | Low     | Low     |
| Greenberg 2014     | Unclear | Low     | High    | Unclear | High    | Low     |
| Greenberg 2017     | Unclear | Low     | Low     | Low     | Low     | Low     |
| Hakim 2016         | Low     | Unclear | High    | High    | Low     | Low     |
| Halasa 2011        | Unclear | Unclear | Low     | Low     | Low     | Low     |
| Halasa 2016        | Low     | Unclear | High    | High    | Low     | Low     |
| Hartvickson 2015   | Unclear | Low     | Low     | Low     | Low     | Low     |
| Hobermann 2003     | Low     | Low     | High    | Unclear | Low     | Low     |
| Hoft 2011          | Unclear | Unclear | High    | High    | Low     | Low     |
| Holland 2008       | Low     | Unclear | High    | High    | Low     | Low     |
| Hoon Han 2013      | Unclear | Unclear | High    | High    | Low     | Low     |
| Hu 2020            | Low     | Low     | Low     | Low     | Low     | Low     |
| Hui 2006           | Low     | Unclear | High    | Unclear | Low     | Low     |
| Hung 2009          | unclear | unclear | high    | High    | High    | Low     |
| Hurwitz 2000       | unclear | unclear | high    | unclear | High    | Low     |



|                  |         |         |         |         |         |         |
|------------------|---------|---------|---------|---------|---------|---------|
| Izikson 2013     | Unclear | Unclear | Unclear | Unclear | Unclear | Unclear |
| Jackson 2010     | Low     | Low     | High    | Unclear | Low     | Low     |
| Jamshed 2019     | unclear | Low     | Low     | Low     | Low     | Low     |
| Jeffs 2015       | Low     | Unclear | High    | High    | Low     | Low     |
| Kanra 2004       | Unclear | Unclear | High    | High    | Low     | Low     |
| Keitel 1997      | Unclear | Unclear | Low     | Low     | Unclear | Low     |
| Keitel 2006      | Unclear | Unclear | Unclear | Unclear | Low     | Low     |
| Keitel 2009      | Unclear | Unclear | Low     | Low     | Low     | Low     |
| Khajedaluae 2018 | high    | high    | high    | High    | Low     | Low     |
| Khan 1996        | Low     | Unclear | Low     | Low     | Low     | Low     |
| Kieninger 2013   | Low     | Low     | Low     | Low     | Low     | Low     |
| King 1998        | Low     | Unclear | Low     | Low     | Low     | Low     |
| King 2000        | Unclear | Unclear | Unclear | Unclear | Low     | Low     |
| Kositantont 2004 | Unclear | Unclear | Unclear | Unclear | Low     | Low     |
| Kumar 2016       | Low     | Low     | High    | Low     | Low     | Low     |
| Lan 2019         | unclear | unclear | unclear | unclear | Low     | Low     |
| Langley 2013     | Low     | Low     | Low     | Low     | Low     | Low     |
| Langley 2014     | Low     | Low     | Low     | Low     | Low     | Low     |
| Leroux-Roels     | Unclear | Unclear | High    | High    | Low     | Low     |
| Leung 2014       | Unclear | Unclear | High    | High    | Unclear | Low     |
| Levin 2008       | Unclear | Unclear | High    | High    | Low     | Low     |
| Levin 2016       | Unclear | Unclear | High    | High    | Low     | Low     |
| Li 2008          | Low     | Unclear | High    | Unclear | Low     | Low     |
| Liebowitz 2020   | Low     | Low     | Low     | Low     | Low     | Low     |
| Li-Kim-Moy 2016  | Low     | unclear | high    | Low     | Low     | Low     |
| Lum 2010         | Low     | Low     | Low     | Low     | Low     | Low     |
| Madhi 2011       | Low     | Low     | Low     | Low     | Low     | Low     |
| Madhi 2013       | Low     | Low     | Low     | Low     | Low     | Low     |
| Madhi 2014       | Low     | Unclear | Low     | Low     | Unclear | Low     |
| Magnani 2005     | Unclear | Unclear | High    | High    | Low     | Low     |
| Mallory 2018     | unclear | unclear | unclear | unclear | Low     | Low     |
| Mallory 2020     | unclear | unclear | unclear | unclear | Low     | low     |
| Marchisio 2009   | Unclear | Unclear | High    | High    | Low     | Low     |
| McBride 2016     | Low     | Unclear | High    | Low     | Low     | Low     |
| McElhaney        | Low     | Unclear | High    | Low     | Low     | Low     |
| McKittrick 2013  | Low     | Low     | Low     | Low     | Low     | Low     |
| McManus 2014     | Unclear | Unclear | Low     | Low     | Unclear | Unclear |

|                      |         |         |         |         |         |         |
|----------------------|---------|---------|---------|---------|---------|---------|
| Mesa –Duque 2001     | Low     | Low     | Low     | Low     | Unclear | low     |
| Minutello 1999       | Unclear | Unclear | High    | Unclear | Low     | Low     |
| Mixeu 2002           | Unclear | Unclear | Low     | Low     | Low     | Low     |
| Miyazaki 1993        | Unclear | Unclear | Unclear | Unclear | Low     | Unclear |
| Monto 2009           | Unclear | Unclear | Low     | Low     | Low     | Low     |
| Morelon 2010         | Low     | Unclear | High    | High    | Low     | Low     |
| Musto 1995           | Unclear | Unclear | High    | High    | Unclear | Unclear |
| Nace 2015            | Low     | Unclear | High    | High    | High    | High    |
| Natori 2017          | Low     | Unclear | High    | Low     | Low     | Low     |
| Natori 2018          | Low     | Low     | High    | Low     | High    | Unclear |
| Nichol 1995          | Low     | Unclear | Low     | Low     | Low     | Low     |
| Nichol 1999          | Low     | Low     | Low     | Low     | Low     | Low     |
| Noh 2019             | Low     | Low     | high    | Low     | Low     | Low     |
| Nolan 2014           | Unclear | Low     | High    | Unclear | Low     | Low     |
| Ohmit 2006           | Low     | Unclear | Low     | Low     | Low     | Low     |
| Ohmit 2008           | Unclear | Unclear | Low     | Low     | Low     | Low     |
| Ortiz 2015           | Unclear | Unclear | Low     | Low     | Low     | Low     |
| Pedroza 2009         | Unclear | Unclear | Unclear | Low     | Low     | Low     |
| Pepin 2013           | Low     | Low     | Low     | Low     | Low     | Low     |
| Pepin 2016           | Low     | Low     | Low     | Low     | Low     | Low     |
| Pepin 2019           | Low     | Low     | high    | High    | High    | Low     |
| Powers 1995          | Unclear | Unclear | Low     | Low     | Unclear | Unclear |
| Pregliasco 2001      | Unclear | Unclear | High    | Unclear | Unclear | Low     |
| Principi 2003        | Unclear | Unclear | High    | High    | Unclear | Unclear |
| Redding 2002         | Low     | Unclear | Low     | Low     | Low     | Low     |
| Reid 1998            | Unclear | Unclear | Low     | Low     | Low     | Unclear |
| Rodriguez Weber 2014 | Low     | Low     | Unclear | Unclear | Low     | Low     |
| Rolfes 2017          | Low     | Low     | Low     | Low     | Low     | Low     |
| Rouphael 2017        | Low     | Unclear | High    | High    | Low     | Low     |
| Rudenko 2001         | Unclear | Unclear | Low     | Low     | Low     | Low     |
| Ruf2004              | Unclear | Unclear | High    | High    | Low     | Low     |
| Safdar 2006          | Unclear | Unclear | Unclear | Unclear | Low     | Low     |
| Sarkar 2020          | Low     | unclear | high    | unclear | Low     | Low     |
| Sarsenbayeva 2018    | Low     | Low     | Low     | Low     | Low     | Low     |
| Saxen 1999           | Unclear | Unclear | Unclear | Unclear | Low     | Low     |
| Schaad 2000          | Unclear | Unclear | High    | High    | Low     | Low     |
| Scheifele 2013       | Low     | Unclear | High    | Low     | Low     | Low     |

|                   |         |         |         |         |         |         |
|-------------------|---------|---------|---------|---------|---------|---------|
| Seo 2014          | Unclear | Unclear | High    | High    | Low     | Low     |
| Seo 2016          | Unclear | Unclear | High    | High    | Low     | Low     |
| Sesay 2018        | Low     | Low     | Low     | Low     | Low     | Low     |
| Sharma 2018       | Low     | unclear | high    | unclear | Low     | Low     |
| Sheldon 2013      | Low     | Low     | Unclear | Unclear | Low     | Low     |
| Sindoni 2009      | Low     | unclear | unclear | unclear | Low     | Low     |
| Sleigh 2000       | Low     | Low     | Low     | Low     | Low     | Low     |
| Solares 2014      | Unclear | Unclear | High    | Unclear | Low     | Low     |
| Song 2007         | Low     | unclear | high    | Low     | High    | Low     |
| Song 2019         | Low     | unclear | Low     | Low     | Low     | Low     |
| Souza 2010        | Unclear | Unclear | High    | High    | High    | Low     |
| Squarcion 2003    | unclear | unclear | high    | high    | Low     | Low     |
| Stapleton 2020    | Low     | Low     | Low     | Low     | Low     | Low     |
| Steinhoff 2017    | Low     | Low     | High    | Low     | Low     | Low     |
| Stevanovic 2018   | Unclear | Low     | Low     | Low     | Low     | Low     |
| Stevanovic 2020   | unclear | unclear | Low     | Low     | Low     | Low     |
| Strijbos 2019     | Low     | unclear | high    | Low     | Low     | Low     |
| Swierkosz 1994    | Unclear | Unclear | Low     | Low     | Unclear | Low     |
| Tam 2007          | Low     | Low     | Low     | Low     | Low     | Low     |
| Tanaka 1993       | Unclear | Unclear | Unclear | Unclear | Unclear | Low     |
| Tapia 2016        | Low     | Low     | Low     | Low     | Low     | Low     |
| Tasker 1999       | Low     | Low     | Low     | Low     | Low     | Low     |
| Tinoco 2014       | Low     | Low     | Low     | Low     | Low     | Low     |
| Treanor 1994      | Unclear | Unclear | Unclear | Unclear | Low     | Low     |
| Treanor 2000      | Unclear | Unclear | Low     | Low     | Low     | Low     |
| Treanor 2005      | Low     | Unclear | Low     | Low     | Low     | Low     |
| Treanor 2007      | Low     | Unclear | Low     | Low     | Low     | Low     |
| Treanor 2011      | Low     | Unclear | Low     | Low     | Low     | Low     |
| Treanor 2017      | Low     | Low     | Low     | Low     | Low     | Low     |
| Tsang 2014        | Unclear | Low     | High    | High    | Low     | Low     |
| Van Damme 2010    | Low     | Low     | High    | High    | Low     | Low     |
| van de Witte 2018 | Low     | Low     | Low     | Low     | Low     | Low     |
| Vardeny 2020      | Low     | Low     | unclear | Low     | Low     | Low     |
| Vesikari 2006     | Low     | Low     | Low     | Low     | Low     | Low     |
| Vesikari 2006 b   | Unclear | Unclear | Low     | Low     | Low     | Low     |
| Vesikari 2008     | Unclear | Unclear | Low     | Low     | Low     | Low     |
| Vesikari 2009     | Low     | Unclear | Unclear | Low     | Low     | Unclear |

|                   |         |         |         |         |      |      |
|-------------------|---------|---------|---------|---------|------|------|
| Vesikari 2011     | Unclear | Unclear | Unclear | Unclear | Low  | Low  |
| Vesikari 2020     | Low     | Low     | Low     | Low     | Low  | Low  |
| Vesikari 2020 b   | Low     | unclear | high    | Low     | Low  | Low  |
| Victor 2016       | Low     | Low     | Low     | Low     | Low  | Low  |
| Volling 2019      | Low     | high    | Low     | Low     | Low  | High |
| Wang 2015         | Low     | Unclear | High    | Unclear | Low  | Low  |
| Wang 2017         | Low     | Low     | Low     | Low     | Low  | Low  |
| Wang 2020         | Low     | Low     | Low     | Low     | Low  | Low  |
| Ward 2020         | Low     | Low     | high    | Low     | Low  | Low  |
| Weingarten 1988   | Low     | unclear | Low     | Low     | Low  | Low  |
| Wilde 1999        | Low     | Low     | Low     | Low     | Low  | Low  |
| Wongsurakiat 2004 | Low     | Low     | Low     | Low     | Low  | Low  |
| Zaman 2008        | Low     | Low     | Low     | Low     | High | Low  |
| Zedda             | Unclear | Unclear | Unclear | Unclear | Low  | Low  |

## Pairwise meta-analyses

| Comparison                        | Outcome       | N. studies | N. patients | RR (95% CI)        | I <sup>2</sup> RR | ARD (95%CI)          | I <sup>2</sup> ARD |
|-----------------------------------|---------------|------------|-------------|--------------------|-------------------|----------------------|--------------------|
| <b>All adults and the elderly</b> |               |            |             |                    |                   |                      |                    |
| placebo vs 3-IIV                  | Infl Lab Conf | 31         | 74282       | 0.42 (0.36, 0.49)  | 48.86%            | -0.03 (-0.04, -0.02) | <b>89.52%</b>      |
| placebo vs 3-RIV                  | Infl Lab Conf | 3          | 5209        | 0.28 (0.09, 0.89)  | 57.40%            | -0.03 (-0.05, 0.00)  | 46.52%             |
| placebo vs 4-IIV                  | Infl Lab Conf | 2          | 1946        | 0.52 (0.39, 0.69)  | 0.00%             | -0.13 (-0.33, 0.08)  | <b>78.77%</b>      |
| placebo vs 3-LAIV                 | Infl Lab Conf | 6          | 6590        | 0.58 (0.48, 0.71)  | 0.00%             | -0.04 (-0.06, -0.01) | 66.82%             |
| 3-IIV vs 3-IIV HD                 | Infl Lab Conf | 3          | 41333       | 0.76 (0.64, 0.90)  | 0.00%             | -0.00 (-0.01, 0.00)  | <b>79.88%</b>      |
| 3-IIV vs 3-IIV MF59/AS03-adj      | Infl Lab Conf | 2          | 43768       | 0.91 (0.68, 1.22)  | 6.58%             | -0.00 (-0.00, 0.00)  | 0.00%              |
| 3-IIV vs 3-RIV                    | Infl Lab Conf | 3          | 1575        | 1.10 (0.51, 2.37)  | 6.64%             | 0.00 (-0.01, 0.02)   | 3.96%              |
| 3-IIV vs 3-LAIV                   | Infl Lab Conf | 7          | 7923        | 1.63 (1.24, 2.15)  | 0.00%             | 0.01 (0.00, 0.02)    | 42.14%             |
| 4-RIV vs 4-IIV                    | Infl Lab Conf | 2          | 21797       | 0.80 (0.62, 1.03)  | 52.84%            | -0.01 (-0.01, 0.00)  | 69.41%             |
| placebo vs 3-IIV                  | Systemic AE   | 30         | 43713       | 1.18 (1.06, 1.31)  | 68.17%            | 0.03 (0.01, 0.05)    | <b>84.43%</b>      |
| placebo vs 3-IIV ID               | Systemic AE   | 2          | 97          | 4.93 (0.81, 30.09) | 0.00%             | 0.26 (-0.08, 0.61)   | <b>76.09%</b>      |
| placebo vs 3-RIV                  | Systemic AE   | 3          | 5209        | 0.97 (0.86, 1.09)  | 0.00%             | -0.00 (-0.02, 0.02)  | 0.00%              |
| placebo vs 4-IIV                  | Systemic AE   | 2          | 1946        | 0.64 (0.19, 2.16)  | <b>90.52%</b>     | -0.12 (-0.41, 0.17)  | <b>90.17%</b>      |
| placebo vs 3-LAIV                 | Systemic AE   | 7          | 5384        | 1.23 (1.12, 1.35)  | 0.00%             | 0.06 (0.03, 0.08)    | 0.00%              |
| 3-IIV vs 3-IIV HD                 | Systemic AE   | 10         | 6016        | 1.21 (1.10, 1.34)  | 16.90%            | 0.06 (0.03, 0.09)    | 11.39%             |
| 3-IIV vs 3-IIV ID                 | Systemic AE   | 24         | 19330       | 1.01 (0.94, 1.09)  | 38.07%            | 0.01 (-0.01, 0.03)   | 44.23%             |
| 3-IIV vs 3-IIV MF59/AS03-adj      | Systemic AE   | 23         | 57933       | 1.25 (1.13, 1.39)  | 35.76%            | 0.02 (0.01, 0.04)    | 74.54%             |
| 3-IIV vs 3-IIV vir/lip-adj        | Systemic AE   | 7          | 1940        | 0.83 (0.65, 1.05)  | 0.00%             | -0.02 (-0.06, 0.02)  | 67.30%             |
| 3-IIV vs 3-RIV                    | Systemic AE   | 4          | 1602        | 0.97 (0.77, 1.22)  | 0.00%             | 0.00 (-0.03, 0.04)   | 0.00%              |

| Comparison                                 | Outcome     | N. studies | N. patients | RR (95% CI)        | I <sup>2</sup> RR | ARD (95%CI)         | I <sup>2</sup> ARD |
|--------------------------------------------|-------------|------------|-------------|--------------------|-------------------|---------------------|--------------------|
| 3-IIV vs 4-IIV                             | Systemic AE | 18         | 23154       | 1.03 (0.98, 1.08)  | 0.00%             | 0.01 (-0.00, 0.02)  | 0.00%              |
| 3-IIV vs 3-LAIV                            | Systemic AE | 6          | 6151        | 1.13 (1.05, 1.22)  | 0.00%             | 0.04 (0.01, 0.06)   | 0.00%              |
| 3-IIV HD vs 4-IIV                          | Systemic AE | 3          | 6318        | 1.00 (0.86, 1.16)  | 0.00%             | -0.00 (-0.01, 0.01) | 0.00%              |
| 3-IIV ID vs 3-IIV MF59/AS03-adj            | Systemic AE | 4          | 1766        | 0.93 (0.78, 1.11)  | 0.00%             | 0.00 (-0.02, 0.02)  | 0.00%              |
| 3-IIV ID vs 3-IIV vir/lip-adj              | Systemic AE | 2          | 623         | 0.93 (0.50, 1.72)  | 0.00%             | -0.00 (-0.04, 0.03) | 0.00%              |
| 3-IIV MF59/AS03-adj vs 3-IIV vir/lip-adj   | Systemic AE | 5          | 1605        | 0.74 (0.54, 1.02)  | 29.26%            | -0.04 (-0.14, 0.05) | <b>91.23%</b>      |
| 3-IIV MF59/AS03-adj vs 4-IIV               | Systemic AE | 2          | 1226        | 0.84 (0.64, 1.10)  | 0.00%             | -0.04 (-0.24, 0.16) | <b>88.45%</b>      |
| 4-IIV MF59/AS03-adj vs 3-IIV MF59/AS03-adj | Systemic AE | 2          | 1988        | 1.10 (0.92, 1.31)  | 0.00%             | 0.01 (-0.02, 0.04)  | 0.00%              |
| 4-RIV vs 4-IIV                             | Systemic AE | 4          | 23990       | 1.07 (0.95, 1.20)  | 28.40%            | 0.01 (-0.04, 0.05)  | <b>97.67%</b>      |
| 3-LAIV vs 4-LAIV                           | Systemic AE | 2          | 3600        | 0.99 (0.92, 1.07)  | 0.00%             | -0.00 (-0.04, 0.03) | 0.00%              |
| placebo vs 3-IIV                           | Local AE    | 30         | 39906       | 2.78 (2.26, 3.43)  | <b>92.89%</b>     | 0.26 (0.20, 0.32)   | <b>98.09%</b>      |
| placebo vs 3-IIV ID                        | Local AE    | 2          | 97          | 2.48 (0.63, 9.70)  | 0.00%             | 0.10 (-0.03, 0.24)  | 0.00%              |
| placebo vs 3-RIV                           | Local AE    | 3          | 5209        | 3.81 (2.66, 5.47)  | 57.62%            | 0.25 (0.14, 0.37)   | <b>85.81%</b>      |
| placebo vs 4-IIV                           | Local AE    | 2          | 1946        | 3.86 (0.89, 16.81) | 61.03%            | 0.19 (-0.00, 0.37)  | <b>89.36%</b>      |
| placebo vs 3-LAIV                          | Local AE    | 7          | 9875        | 1.76 (1.65, 1.87)  | 0.00%             | 0.18 (0.16, 0.21)   | 37.44%             |
| 3-IIV vs 3-IIV HD                          | Local AE    | 9          | 5915        | 1.48 (1.34, 1.63)  | 13.63%            | 0.12 (0.08, 0.16)   | 49.15%             |
| 3-IIV vs 3-IIV ID                          | Local AE    | 25         | 19551       | 1.54 (1.31, 1.82)  | <b>93.38%</b>     | 0.16 (-0.01, 0.32)  | <b>99.72%</b>      |
| 3-IIV vs 3-IIV MF59/AS03-adj               | Local AE    | 21         | 57818       | 1.84 (1.60, 2.12)  | <b>76.25%</b>     | 0.13 (0.09, 0.17)   | <b>94.88%</b>      |
| 3-IIV vs 3-IIV vir/lip-adj                 | Local AE    | 7          | 1940        | 1.36 (1.05, 1.74)  | 37.19%            | 0.08 (-0.01, 0.17)  | <b>88.89%</b>      |
| 3-IIV vs 3-RIV                             | Local AE    | 4          | 1602        | 0.61 (0.33, 1.10)  | <b>79.89%</b>     | -0.08 (-0.18, 0.02) | <b>75.32%</b>      |
| 3-IIV vs 4-IIV                             | Local AE    | 19         | 24857       | 1.14 (1.08, 1.21)  | 53.35%            | 0.04 (0.02, 0.06)   | <b>84.27%</b>      |

| Comparison                                 | Outcome         | N. studies | N. patients | RR (95% CI)       | I <sup>2</sup> RR | ARD (95%CI)          | I <sup>2</sup> ARD |
|--------------------------------------------|-----------------|------------|-------------|-------------------|-------------------|----------------------|--------------------|
| 3-IIV vs 3-LAIV                            | Local AE        | 5          | 6082        | 1.25 (0.69, 2.25) | <b>98.00%</b>     | 0.04 (-0.13, 0.21)   | <b>97.57%</b>      |
| 3-IIV HD vs 4-IIV                          | Local AE        | 3          | 6318        | 0.99 (0.81, 1.20) | 0.00%             | -0.00 (-0.01, 0.01)  | 0.00%              |
| 3-IIV ID vs 3-IIV MF59/AS03-adj            | Local AE        | 4          | 1766        | 1.03 (0.56, 1.90) | <b>86.66%</b>     | -0.03 (-0.15, 0.08)  | <b>92.71%</b>      |
| 3-IIV ID vs 3-IIV vir/lip-adj              | Local AE        | 2          | 623         | 0.50 (0.39, 0.64) | 0.00%             | -0.26 (-0.61, 0.09)  | <b>94.94%</b>      |
| 3-IIV MF59/AS03-adj vs 3-IIV vir/lip-adj   | Local AE        | 5          | 1605        | 0.57 (0.45, 0.73) | 39.04%            | -0.15 (-0.34, 0.04)  | <b>96.67%</b>      |
| 3-IIV MF59/AS03-adj vs 4-IIV               | Local AE        | 2          | 1226        | 1.02 (0.86, 1.21) | 0.00%             | -0.00 (-0.02, 0.01)  | 0.00%              |
| 4-IIV MF59/AS03-adj vs 3-IIV MF59/AS03-adj | Local AE        | 2          | 1988        | 1.07 (0.92, 1.23) | 0.00%             | 0.01 (-0.05, 0.06)   | 29.05%             |
| 4-RIV vs 4-IIV                             | Local AE        | 4          | 23990       | 1.04 (0.80, 1.35) | <b>96.54%</b>     | 0.01 (-0.05, 0.07)   | <b>97.12%</b>      |
| 3-LAIV vs 4-LAIV                           | Local AE        | 2          | 3600        | 0.95 (0.73, 1.24) | <b>88.64%</b>     | -0.01 (-0.11, 0.08)  | <b>87.90%</b>      |
| placebo vs 3-IIV                           | ILI             | 27         | 42312       | 0.81 (0.74, 0.90) | 73.74%            | -0.04 (-0.06, -0.02) | <b>81.33%</b>      |
| placebo vs 3-RIV                           | ILI             | 2          | 4749        | 0.77 (0.62, 0.96) | 0.00%             | -0.02 (-0.03, -0.00) | 0.00%              |
| placebo vs 4-IIV                           | ILI             | 2          | 1946        | 0.79 (0.63, 0.98) | 0.00%             | -0.05 (-0.16, 0.05)  | 41.94%             |
| placebo vs 3-LAIV                          | ILI             | 2          | 7803        | 0.95 (0.90, 1.00) | 0.00%             | -0.02 (-0.03, 0.00)  | 0.00%              |
| 3-IIV vs 3-RIV                             | ILI             | 3          | 1575        | 0.98 (0.66, 1.46) | 0.00%             | -0.00 (-0.03, 0.02)  | 0.00%              |
| placebo vs 3-IIV                           | Mortality       | 11         | 26844       | 1.16 (0.45, 3.01) | 0.00%             | 0.00 (-0.00, 0.00)   | 0.00%              |
| placebo vs 3-LAIV                          | Mortality       | 2          | 7803        | 0.57 (0.08, 3.97) | 0.00%             | -0.00 (-0.00, 0.00)  | 43.43%             |
| 3-IIV vs 3-IIV HD                          | Mortality       | 4          | 36165       | 1.00 (0.75, 1.33) | 0.00%             | 0.00 (-0.00, 0.00)   | 0.00%              |
| 3-IIV vs 3-IIV MF59/AS03-adj               | Mortality       | 3          | 50867       | 0.89 (0.60, 1.32) | 42.45%            | -0.00 (-0.00, 0.00)  | 0.00%              |
| 3-IIV vs 4-IIV                             | Mortality       | 6          | 9362        | 1.67 (0.55, 5.04) | 0.00%             | 0.00 (-0.00, 0.00)   | 0.00%              |
| 4-RIV vs 4-IIV                             | Mortality       | 2          | 21797       | 0.69 (0.39, 1.22) | 0.00%             | -0.00 (-0.00, 0.00)  | 0.00%              |
| placebo vs 3-IIV                           | Hospitalization | 11         | 4794        | 0.44 (0.25, 0.79) | 0.00%             | -0.01 (-0.02, 0.01)  | <b>88.71%</b>      |

| Comparison                               | Outcome         | N. studies | N. patients | RR (95% CI)       | I <sup>2</sup> RR | ARD (95%CI)          | I <sup>2</sup> ARD |
|------------------------------------------|-----------------|------------|-------------|-------------------|-------------------|----------------------|--------------------|
| placebo vs 3-LAIV                        | Hospitalization | 2          | 7803        | 0.78 (0.39, 1.58) | 0.00%             | -0.00 (-0.00, 0.00)  | 0.00%              |
| 3-IIV vs 3-IIV HD                        | Hospitalization | 3          | 472         | 0.49 (0.23, 1.04) | 0.00%             | -0.03 (-0.08, 0.03)  | 69.04%             |
| 3-IIV vs 3-IIV MF59/AS03-adj             | Hospitalization | 3          | 43836       | 0.92 (0.70, 1.21) | 0.00%             | -0.00 (-0.00, 0.00)  | 0.00%              |
| <b>The elderly (≥61 years)</b>           |                 |            |             |                   |                   |                      |                    |
| placebo vs 3-IIV                         | Infl Lab Conf   | 3          | 453         | 0.58 (0.20, 1.67) | <b>80.51%</b>     | -0.07 (-0.21, 0.07)  | <b>75.49%</b>      |
| placebo vs 3-LAIV                        | Infl Lab Conf   | 2          | 3466        | 0.57 (0.44, 0.75) | 0.00%             | -0.03 (-0.05, -0.02) | 0.00%              |
| 3-IIV vs 3-IIV HD                        | Infl Lab Conf   | 2          | 41161       | 0.76 (0.64, 0.90) | 0.00%             | -0.00 (-0.01, 0.00)  | <b>89.58%</b>      |
| 3-IIV vs 3-LAIV                          | Infl Lab Conf   | 2          | 3218        | 1.43 (0.81, 2.54) | 0.00%             | 0.01 (-0.00, 0.01)   | 0.00%              |
| placebo vs 3-IIV                         | Systemic AE     | 5          | 1124        | 0.88 (0.77, 1.01) | 0.00%             | -0.03 (-0.08, 0.03)  | 20.41%             |
| placebo vs 3-LAIV                        | Systemic AE     | 2          | 3287        | 1.19 (1.06, 1.34) | 0.00%             | 0.05 (0.02, 0.08)    | 0.00%              |
| 3-IIV vs 3-IIV HD                        | Systemic AE     | 4          | 5030        | 1.23 (1.05, 1.43) | 30.67%            | 0.05 (0.01, 0.10)    | 44.15%             |
| 3-IIV vs 3-IIV ID                        | Systemic AE     | 10         | 6880        | 1.08 (0.98, 1.20) | 4.39%             | 0.02 (0.00, 0.04)    | 0.13%              |
| 3-IIV vs 3-IIV MF59/AS03-adj             | Systemic AE     | 12         | 55886       | 1.24 (1.06, 1.43) | 57.91%            | 0.02 (0.00, 0.04)    | <b>82.98%</b>      |
| 3-IIV vs 3-IIV vir/lip-adj               | Systemic AE     | 3          | 765         | 0.93 (0.58, 1.50) | 0.00%             | 0.01 (-0.02, 0.04)   | 27.71%             |
| 3-IIV vs 4-IIV                           | Systemic AE     | 4          | 4319        | 1.06 (0.92, 1.23) | 0.00%             | 0.01 (-0.01, 0.03)   | 0.00%              |
| 3-IIV vs 3-LAIV                          | Systemic AE     | 2          | 3073        | 1.11 (0.99, 1.25) | 0.00%             | 0.03 (-0.00, 0.06)   | 0.00%              |
| 3-IIV HD vs 4-IIV                        | Systemic AE     | 2          | 6278        | 0.97 (0.83, 1.13) | 0.00%             | -0.00 (-0.01, 0.01)  | 0.00%              |
| 3-IIV ID vs 3-IIV MF59/AS03-adj          | Systemic AE     | 4          | 1766        | 0.93 (0.78, 1.11) | 0.00%             | 0.00 (-0.02, 0.02)   | 0.00%              |
| 3-IIV ID vs 3-IIV vir/lip-adj            | Systemic AE     | 2          | 623         | 0.93 (0.50, 1.72) | 0.00%             | -0.00 (-0.04, 0.03)  | 0.00%              |
| 3-IIV MF59/AS03-adj vs 3-IIV vir/lip-adj | Systemic AE     | 3          | 805         | 0.81 (0.40, 1.66) | 38.54%            | -0.03 (-0.23, 0.16)  | <b>94.30%</b>      |
| 4-RIV vs 4-IIV                           | Systemic AE     | 2          | 13637       | 1.13 (1.06, 1.20) | 0.00%             | 0.02 (-0.01, 0.05)   | <b>90.01%</b>      |



| Comparison                                                           | Outcome         | N. studies | N. patients | RR (95% CI)        | I <sup>2</sup> RR | ARD (95%CI)         | I <sup>2</sup> ARD |
|----------------------------------------------------------------------|-----------------|------------|-------------|--------------------|-------------------|---------------------|--------------------|
| placebo vs 3-IIV                                                     | Local AE        | 4          | 1023        | 3.13 (1.68, 5.85)  | 8.69%             | 0.13 (0.05, 0.21)   | 63.61%             |
| placebo vs 3-LAIV                                                    | Local AE        | 2          | 3287        | 1.82 (1.64, 2.03)  | 0.00%             | 0.12 (-0.03, 0.27)  | <b>81.00%</b>      |
| 3-IIV vs 3-IIV HD                                                    | Local AE        | 3          | 4929        | 1.55 (1.33, 1.80)  | 47.38%            | 0.14 (0.09, 0.19)   | 50.80%             |
| 3-IIV vs 3-IIV ID                                                    | Local AE        | 11         | 7101        | 1.74 (1.38, 2.19)  | 73.46%            | 0.16 (0.00, 0.31)   | <b>98.58%</b>      |
| 3-IIV vs 3-IIV MF59/AS03-adj                                         | Local AE        | 12         | 55886       | 1.89 (1.58, 2.26)  | <b>76.08%</b>     | 0.10 (0.05, 0.14)   | <b>95.82%</b>      |
| 3-IIV vs 3-IIV vir/lip-adj                                           | Local AE        | 3          | 765         | 1.12 (0.73, 1.72)  | 0.00%             | 0.01 (-0.01, 0.02)  | 0.00%              |
| 3-IIV vs 4-IIV                                                       | Local AE        | 4          | 4319        | 1.22 (1.01, 1.46)  | 26.40%            | 0.03 (0.01, 0.04)   | 0.00%              |
| 3-IIV vs 3-LAIV                                                      | Local AE        | 2          | 3073        | 0.76 (0.04, 12.85) | <b>86.92%</b>     | 0.03 (-0.35, 0.42)  | <b>95.88%</b>      |
| 3-IIV HD vs 4-IIV                                                    | Local AE        | 2          | 6278        | 0.98 (0.80, 1.21)  | 0.00%             | -0.00 (-0.01, 0.01) | 0.00%              |
| 3-IIV ID vs 3-IIV MF59/AS03-adj                                      | Local AE        | 4          | 1766        | 1.03 (0.56, 1.90)  | <b>86.66%</b>     | -0.03 (-0.15, 0.08) | <b>92.71%</b>      |
| 3-IIV ID vs 3-IIV vir/lip-adj                                        | Local AE        | 2          | 623         | 0.50 (0.39, 0.64)  | 0.00%             | -0.26 (-0.61, 0.09) | <b>94.94%</b>      |
| 3-IIV MF59/AS03-adj vs 3-IIV vir/lip-adj                             | Local AE        | 3          | 805         | 0.60 (0.38, 0.97)  | 59.05%            | -0.12 (-0.45, 0.21) | <b>97.13%</b>      |
| 4-RIV vs 4-IIV                                                       | Local AE        | 2          | 13637       | 0.84 (0.23, 3.02)  | 68.13%            | 0.03 (-0.09, 0.15)  | <b>99.26%</b>      |
| placebo vs 3-IIV                                                     | ILI             | 2          | 854         | 0.42 (0.19, 0.96)  | 0.00%             | -0.07 (-0.32, 0.17) | <b>93.21%</b>      |
| 3-IIV vs 3-IIV HD                                                    | Mortality       | 2          | 35865       | 1.00 (0.75, 1.34)  | 0.00%             | 0.00 (-0.00, 0.00)  | 0.00%              |
| 3-IIV vs 3-IIV MF59/AS03-adj                                         | Mortality       | 2          | 50799       | 0.88 (0.57, 1.35)  | 65.16%            | -0.00 (-0.00, 0.00) | 4.85%              |
| 3-IIV vs 4-IIV                                                       | Mortality       | 2          | 1664        | 2.43 (0.12, 47.37) | 0.00%             | 0.00 (-0.00, 0.01)  | 0.00%              |
| placebo vs 3-IIV                                                     | Hospitalization | 3          | 982         | 0.35 (0.13, 0.90)  | 0.00%             | -0.05 (-0.22, 0.12) | <b>95.10%</b>      |
| <b>Adults and the Elderly -Immunocompromised/cancer participants</b> |                 |            |             |                    |                   |                     |                    |
| placebo vs 3-IIV                                                     | Infl Lab Conf   | 3          | 802         | 0.24 (0.09, 0.64)  | 44.50%            | -0.13 (-0.28, 0.02) | <b>90.06%</b>      |
| placebo vs 3-IIV                                                     | Systemic AE     | 4          | 768         | 1.17 (0.88, 1.56)  | 0.00%             | 0.03 (-0.06, 0.12)  | 59.03%             |

| Comparison                                                  | Outcome         | N. studies | N. patients | RR (95% CI)        | I <sup>2</sup> RR | ARD (95%CI)          | I <sup>2</sup> ARD |
|-------------------------------------------------------------|-----------------|------------|-------------|--------------------|-------------------|----------------------|--------------------|
| 3-IIV vs 3-IIV HD                                           | Systemic AE     | 4          | 516         | 1.16 (0.86, 1.57)  | 31.63%            | 0.07 (-0.00, 0.13)   | 0.00%              |
| 3-IIV vs 3-IIV ID                                           | Systemic AE     | 3          | 206         | 2.21 (0.58, 8.41)  | 59.08%            | 0.12 (0.04, 0.21)    | 0.00%              |
| 3-IIV vs 3-IIV MF59/AS03-adj                                | Systemic AE     | 5          | 315         | 1.45 (0.78, 2.70)  | 0.00%             | 0.01 (-0.03, 0.05)   | 0.00%              |
| placebo vs 3-IIV                                            | Local AE        | 4          | 778         | 1.54 (0.78, 3.05)  | 47.10%            | 0.12 (-0.08, 0.31)   | <b>87.45%</b>      |
| 3-IIV vs 3-IIV HD                                           | Local AE        | 4          | 516         | 1.39 (0.97, 1.99)  | 0.00%             | 0.06 (-0.00, 0.12)   | 14.05%             |
| 3-IIV vs 3-IIV ID                                           | Local AE        | 3          | 206         | 3.16 (1.07, 9.27)  | <b>77.16%</b>     | 0.39 (0.29, 0.50)    | 0.00%              |
| 3-IIV vs 3-IIV MF59/AS03-adj                                | Local AE        | 3          | 200         | 1.87 (1.02, 3.44)  | 0.00%             | 0.09 (-0.05, 0.24)   | 53.69%             |
| placebo vs 3-IIV                                            | ILI             | 4          | 852         | 0.68 (0.48, 0.95)  | 26.07%            | -0.13 (-0.30, 0.04)  | <b>85.35%</b>      |
| placebo vs 3-IIV                                            | Mortality       | 2          | 537         | 0.57 (0.07, 4.79)  | 0.00%             | -0.00 (-0.02, 0.01)  | 0.00%              |
| 3-IIV vs 3-IIV HD                                           | Mortality       | 2          | 300         | 1.00 (0.06, 15.84) | 0.00%             | 0.00 (-0.02, 0.02)   | 0.00%              |
| placebo vs 3-IIV                                            | Hospitalization | 3          | 658         | 0.42 (0.11, 1.61)  | 33.07%            | -0.05 (-0.14, 0.04)  | <b>91.29%</b>      |
| 3-IIV vs 3-IIV HD                                           | Hospitalization | 3          | 472         | 0.49 (0.23, 1.04)  | 0.00%             | -0.03 (-0.08, 0.03)  | 69.04%             |
| 3-IIV vs 3-IIV MF59/AS03-adj                                | Hospitalization | 2          | 141         | 0.83 (0.41, 1.67)  | 0.00%             | -0.02 (-0.13, 0.09)  | 0.00%              |
| <b>Adults and elderly with chronic respiratory diseases</b> |                 |            |             |                    |                   |                      |                    |
| placebo vs 3-IIV                                            | Infl Lab Conf   | 2          | 248         | 0.59 (0.11, 3.31)  | <b>88.74%</b>     | -0.06 (-0.36, 0.23)  | <b>87.81%</b>      |
| placebo vs 3-IIV                                            | ILI             | 2          | 253         | 0.50 (0.36, 0.68)  | 0.00%             | -0.24 (-0.43, -0.05) | 68.05%             |
| placebo vs 3-IIV                                            | Hospitalization | 2          | 253         | 0.31 (0.08, 1.22)  | 0.00%             | -0.05 (-0.10, 0.01)  | 0.00%              |
| <b>All children</b>                                         |                 |            |             |                    |                   |                      |                    |
| placebo vs 3-IIV                                            | Infl Lab Conf   | 8          | 7561        | 0.60 (0.48, 0.76)  | 31.20%            | -0.04 (-0.07, -0.01) | 70.51%             |
| placebo vs 4-IIV                                            | Infl Lab Conf   | 2          | 17454       | 0.51 (0.46, 0.56)  | 0.00%             | -0.05 (-0.06, -0.04) | 26.82%             |
| placebo vs 3-LAIV                                           | Infl Lab Conf   | 11         | 17704       | 0.29 (0.18, 0.47)  | <b>94.04%</b>     | -0.09 (-0.13, -0.05) | <b>94.07%</b>      |

| Comparison                   | Outcome       | N. studies | N. patients | RR (95% CI)        | I <sup>2</sup> RR | ARD (95%CI)          | I <sup>2</sup> ARD |
|------------------------------|---------------|------------|-------------|--------------------|-------------------|----------------------|--------------------|
| 3-IIV vs 3-LAIV              | Infl Lab Conf | 3          | 12768       | 0.51 (0.40, 0.66)  | 50.43%            | -0.03 (-0.05, -0.02) | 61.23%             |
| placebo vs 3-IIV             | Systemic AE   | 5          | 5495        | 1.14 (0.69, 1.87)  | <b>97.38%</b>     | 0.04 (-0.06, 0.15)   | <b>93.57%</b>      |
| placebo vs 3-LAIV            | Systemic AE   | 20         | 21549       | 1.09 (1.03, 1.16)  | 0.00%             | 0.01 (-0.00, 0.02)   | <b>79.33%</b>      |
| 3-IIV vs 3-IIV HD            | Systemic AE   | 3          | 171         | 1.03 (0.32, 3.28)  | 61.36%            | 0.00 (-0.24, 0.24)   | 74.68%             |
| 3-IIV vs 3-IIV ID            | Systemic AE   | 3          | 350         | 1.22 (0.73, 2.03)  | 41.44%            | 0.05 (-0.07, 0.17)   | 45.71%             |
| 3-IIV vs 3-IIV MF59/AS03-adj | Systemic AE   | 7          | 11051       | 1.17 (1.06, 1.30)  | 23.57%            | 0.04 (0.01, 0.07)    | 47.29%             |
| 3-IIV vs 3-IIV vir/lip-adj   | Systemic AE   | 3          | 577         | 1.21 (0.92, 1.61)  | 0.00%             | 0.02 (-0.01, 0.06)   | 0.00%              |
| 3-IIV vs 4-IIV               | Systemic AE   | 13         | 21378       | 0.97 (0.87, 1.08)  | <b>84.87%</b>     | -0.01 (-0.04, 0.02)  | <b>81.37%</b>      |
| 3-IIV vs 3-LAIV              | Systemic AE   | 6          | 13093       | 1.39 (0.97, 1.98)  | <b>92.25%</b>     | 0.04 (0.02, 0.05)    | 10.57%             |
| 3-LAIV vs 4-LAIV             | Systemic AE   | 2          | 2512        | 2.97 (0.86, 10.32) | 0.00%             | 0.01 (0.00, 0.01)    | 0.00%              |
| placebo vs 3-IIV             | Local AE      | 5          | 5495        | 1.47 (0.92, 2.35)  | <b>95.29%</b>     | 0.09 (-0.02, 0.20)   | <b>90.90%</b>      |
| placebo vs 3-LAIV            | Local AE      | 19         | 21293       | 1.13 (1.08, 1.19)  | 55.59%            | 0.06 (0.03, 0.09)    | <b>79.75%</b>      |
| 3-IIV vs 3-IIV HD            | Local AE      | 3          | 171         | 1.07 (0.72, 1.59)  | 0.00%             | 0.00 (-0.14, 0.15)   | 3.78%              |
| 3-IIV vs 3-IIV ID            | Local AE      | 3          | 350         | 1.68 (0.66, 4.26)  | 22.64%            | 0.04 (-0.07, 0.16)   | <b>79.64%</b>      |
| 3-IIV vs 3-IIV MF59/AS03-adj | Local AE      | 7          | 11051       | 1.24 (0.93, 1.66)  | <b>94.33%</b>     | 0.06 (0.00, 0.12)    | <b>86.48%</b>      |
| 3-IIV vs 3-IIV vir/lip-adj   | Local AE      | 3          | 577         | 0.90 (0.61, 1.33)  | 0.00%             | 0.00 (-0.03, 0.04)   | 0.00%              |
| 3-IIV vs 4-IIV               | Local AE      | 13         | 21323       | 1.02 (0.95, 1.09)  | 60.97%            | 0.01 (-0.01, 0.02)   | 55.23%             |
| 3-IIV vs 3-LAIV              | Local AE      | 4          | 2512        | 2.12 (1.93, 2.32)  | 0.00%             | 0.34 (0.26, 0.42)    | 41.00%             |
| placebo vs 3-IIV             | Otitis Media  | 3          | 1137        | 1.02 (0.78, 1.34)  | 52.15%            | 0.00 (-0.08, 0.08)   | 68.34%             |
| placebo vs 3-LAIV            | Otitis Media  | 7          | 15737       | 0.59 (0.30, 1.16)  | <b>83.25%</b>     | -0.02 (-0.05, 0.01)  | <b>92.19%</b>      |
| placebo vs 3-IIV             | ILI           | 6          | 2148        | 0.61 (0.44, 0.84)  | 63.49%            | -0.09 (-0.15, -0.03) | 73.80%             |

| Comparison                            | Outcome         | N. studies | N. patients | RR (95% CI)        | I <sup>2</sup> RR | ARD (95%CI)          | I <sup>2</sup> ARD |
|---------------------------------------|-----------------|------------|-------------|--------------------|-------------------|----------------------|--------------------|
| placebo vs 3-LAIV                     | ILI             | 7          | 12465       | 0.72 (0.57, 0.90)  | 70.61%            | -0.07 (-0.12, -0.03) | <b>83.55%</b>      |
| 3-IIV vs 3-LAIV                       | ILI             | 3          | 10907       | 1.11 (0.98, 1.26)  | 0.00%             | 0.01 (-0.00, 0.02)   | 0.00%              |
| placebo vs 3-IIV                      | Mortality       | 3          | 8663        | 0.90 (0.11, 7.43)  | 0.00%             | 0.00 (-0.00, 0.00)   | 0.00%              |
| placebo vs 4-IIV                      | Mortality       | 2          | 17454       | 1.17 (0.10, 13.37) | 58.11%            | 0.00 (-0.00, 0.00)   | 69.21%             |
| placebo vs 3-LAIV                     | Mortality       | 3          | 4994        | 1.51 (0.25, 9.21)  | 0.00%             | 0.00 (-0.00, 0.00)   | 0.00%              |
| 3-IIV vs 3-IIV MF59/AS03-adj          | Mortality       | 3          | 10101       | 0.28 (0.05, 1.49)  | 0.00%             | -0.00 (-0.00, 0.00)  | 66.59%             |
| 3-IIV vs 4-IIV                        | Mortality       | 4          | 7008        | 1.32 (0.13, 13.50) | 0.00%             | 0.00 (-0.00, 0.00)   | 0.00%              |
| placebo vs 3-IIV                      | Hospitalization | 5          | 7372        | 1.03 (0.59, 1.78)  | 45.59%            | -0.00 (-0.01, 0.01)  | 64.60%             |
| placebo vs 4-IIV                      | Hospitalization | 2          | 17454       | 1.00 (0.23, 4.39)  | 0.00%             | -0.00 (-0.00, 0.00)  | 0.00%              |
| placebo vs 3-LAIV                     | Hospitalization | 3          | 12254       | 1.02 (0.58, 1.80)  | 17.61%            | -0.00 (-0.00, 0.00)  | 19.06%             |
| 3-IIV vs 3-LAIV                       | Hospitalization | 3          | 12768       | 1.08 (0.85, 1.36)  | 0.00%             | 0.00 (-0.01, 0.01)   | 57.09%             |
| <b>Young children (up to 5 years)</b> |                 |            |             |                    |                   |                      |                    |
| placebo vs 3-IIV                      | Infl Lab Conf   | 6          | 6646        | 0.65 (0.51, 0.82)  | 31.95%            | -0.04 (-0.08, -0.01) | 62.63%             |
| placebo vs 4-IIV                      | Infl Lab Conf   | 2          | 17454       | 0.51 (0.46, 0.56)  | 0.00%             | -0.05 (-0.06, -0.04) | 26.82%             |
| placebo vs 3-LAIV                     | Infl Lab Conf   | 8          | 15620       | 0.30 (0.18, 0.51)  | <b>95.74%</b>     | -0.09 (-0.12, -0.05) | <b>90.87%</b>      |
| 3-IIV vs 3-LAIV                       | Infl Lab Conf   | 2          | 10539       | 0.45 (0.38, 0.54)  | 0.00%             | -0.04 (-0.05, -0.03) | 46.54%             |
| placebo vs 3-IIV                      | Systemic AE     | 3          | 4636        | 1.37 (0.69, 2.73)  | <b>98.74%</b>     | 0.09 (-0.09, 0.26)   | <b>96.91%</b>      |
| placebo vs 3-LAIV                     | Systemic AE     | 16         | 19436       | 1.09 (1.03, 1.16)  | 0.00%             | 0.01 (-0.00, 0.03)   | <b>83.58%</b>      |
| 3-IIV vs 3-IIV MF59/AS03-adj          | Systemic AE     | 7          | 11051       | 1.17 (1.06, 1.30)  | 23.57%            | 0.04 (0.01, 0.07)    | 47.29%             |
| 3-IIV vs 4-IIV                        | Systemic AE     | 6          | 8166        | 0.93 (0.74, 1.16)  | <b>92.18%</b>     | -0.03 (-0.11, 0.05)  | <b>89.48%</b>      |
| 3-IIV vs 3-LAIV                       | Systemic AE     | 3          | 10566       | 1.87 (0.83, 4.20)  | <b>94.46%</b>     | 0.03 (0.03, 0.04)    | 0.00%              |

| Comparison                                            | Outcome         | N. studies | N. patients | RR (95% CI)        | I <sup>2</sup> RR | ARD (95%CI)          | I <sup>2</sup> ARD |
|-------------------------------------------------------|-----------------|------------|-------------|--------------------|-------------------|----------------------|--------------------|
| placebo vs 3-IIV                                      | Local AE        | 3          | 4636        | 1.30 (0.76, 2.23)  | <b>95.60%</b>     | 0.05 (-0.07, 0.17)   | <b>90.43%</b>      |
| placebo vs 3-LAIV                                     | Local AE        | 15         | 19180       | 1.13 (1.07, 1.19)  | 62.51%            | 0.05 (0.02, 0.09)    | <b>82.22%</b>      |
| 3-IIV vs 3-IIV MF59/AS03-adj                          | Local AE        | 7          | 11051       | 1.24 (0.93, 1.66)  | <b>94.33%</b>     | 0.06 (0.00, 0.12)    | <b>86.48%</b>      |
| 3-IIV vs 4-IIV                                        | Local AE        | 6          | 8166        | 0.96 (0.81, 1.14)  | 74.47%            | -0.01 (-0.06, 0.04)  | <b>81.96%</b>      |
| 3-IIV vs 3-LAIV                                       | Local AE        | 2          | 2214        | 3.30 (0.83, 13.05) | 59.08%            | 0.45 (0.19, 0.71)    | 71.52%             |
| placebo vs 3-IIV                                      | Otitis Media    | 3          | 1137        | 1.02 (0.78, 1.34)  | 52.15%            | 0.00 (-0.08, 0.08)   | 68.34%             |
| placebo vs 3-LAIV                                     | Otitis Media    | 5          | 5999        | 0.33 (0.13, 0.81)  | <b>87.06%</b>     | -0.03 (-0.04, -0.02) | 0.00%              |
| placebo vs 3-IIV                                      | ILI             | 3          | 878         | 0.58 (0.33, 1.01)  | <b>79.09%</b>     | -0.14 (-0.30, 0.02)  | <b>87.12%</b>      |
| 3-IIV vs 3-LAIV                                       | ILI             | 2          | 10539       | 1.11 (0.97, 1.26)  | 0.00%             | 0.01 (-0.00, 0.02)   | 0.00%              |
| placebo vs 3-IIV                                      | Mortality       | 3          | 8663        | 0.90 (0.11, 7.43)  | 0.00%             | 0.00 (-0.00, 0.00)   | 0.00%              |
| placebo vs 4-IIV                                      | Mortality       | 2          | 17454       | 1.17 (0.10, 13.37) | 58.11%            | 0.00 (-0.00, 0.00)   | 69.21%             |
| placebo vs 3-LAIV                                     | Mortality       | 2          | 2994        | 1.09 (0.12, 9.79)  | 0.00%             | 0.00 (-0.00, 0.00)   | 0.00%              |
| 3-IIV vs 3-IIV MF59/AS03-adj                          | Mortality       | 3          | 10101       | 0.28 (0.05, 1.49)  | 0.00%             | -0.00 (-0.00, 0.00)  | 66.59%             |
| placebo vs 3-IIV                                      | Hospitalization | 5          | 7372        | 1.03 (0.59, 1.78)  | 45.59%            | -0.00 (-0.01, 0.01)  | 64.60%             |
| placebo vs 4-IIV                                      | Hospitalization | 2          | 17454       | 1.00 (0.23, 4.39)  | 0.00%             | -0.00 (-0.00, 0.00)  | 0.00%              |
| placebo vs 3-LAIV                                     | Hospitalization | 2          | 2565        | 1.51 (0.67, 3.41)  | 0.00%             | 0.00 (-0.01, 0.01)   | 50.70%             |
| 3-IIV vs 3-LAIV                                       | Hospitalization | 2          | 10539       | 1.09 (0.86, 1.38)  | 0.00%             | 0.00 (-0.00, 0.01)   | 0.00%              |
| <b>All children with chronic respiratory diseases</b> |                 |            |             |                    |                   |                      |                    |
| placebo vs 3-LAIV                                     | Infl Lab Conf   | 2          | 84          | 0.17 (0.05, 0.58)  | 0.00%             | -0.32 (-0.49, -0.15) | 17.33%             |
| 3-IIV vs 3-LAIV                                       | Infl Lab Conf   | 2          | 4416        | 0.58 (0.40, 0.82)  | 40.53%            | -0.03 (-0.04, -0.01) | 0.00%              |
| placebo vs 3-LAIV                                     | ILI             | 2          | 84          | 0.23 (0.08, 0.64)  | 0.00%             | -0.35 (-0.51, -0.19) | 0.00%              |

| Comparison                                   | Outcome                 | N. studies | N. patients | RR (95% CI)        | I <sup>2</sup> RR | ARD (95%CI)         | I <sup>2</sup> ARD |
|----------------------------------------------|-------------------------|------------|-------------|--------------------|-------------------|---------------------|--------------------|
| 3-IIV vs 3-LAIV                              | Hospitalization         | 2          | 4416        | 0.89 (0.31, 2.54)  | 10.39%            | -0.00 (-0.00, 0.00) | 0.00%              |
| placebo vs 3-LAIV                            | Exacerb Chronon Disease | 2          | 93          | 2.76 (0.26, 29.54) | 0.00%             | 0.03 (-0.06, 0.12)  | 27.84%             |
| <b>All children immunocompromised/cancer</b> |                         |            |             |                    |                   |                     |                    |
| 3-IIV vs 3-IIV HD                            | Systemic AE             | 3          | 171         | 1.03 (0.32, 3.28)  | 61.36%            | 0.00 (-0.24, 0.24)  | 74.68%             |
| 3-IIV vs 3-LAIV                              | Systemic AE             | 2          | 298         | 1.07 (0.73, 1.56)  | 0.00%             | 0.02 (-0.08, 0.12)  | 0.00%              |
| 3-IIV vs 3-IIV HD                            | Local AE                | 3          | 171         | 1.07 (0.72, 1.59)  | 0.00%             | 0.00 (-0.14, 0.15)  | 3.78%              |
| 3-IIV vs 3-LAIV                              | Local AE                | 2          | 298         | 2.27 (1.62, 3.19)  | 0.00%             | 0.28 (0.18, 0.39)   | 0.00%              |

I<sup>2</sup> values exceeding 75 % are highlighted

#### Abbreviations

**Placebo:** placebo/no vaccine; **3-IIV:** trivalent inactivated intramuscular; **3-IIV HD:** trivalent inactivated high dose intramuscular; **3-IIV ID:** trivalent inactivated intradermal; **3-IIV MF59/AS03-adj:** trivalent inactivated adjuvanted with MF59/AS03 intramuscular; **3-IIV vir/lip-adj:** trivalent inactivated adjuvanted with Virosome/liposome intramuscular; **3-RIV:** trivalent recombinant intramuscular; **4-IIV:** quadrivalent inactivated intramuscular; **4-IIV HD:** quadrivalent inactivated high dose intramuscular; **4-IIV ID:** quadrivalent inactivated intradermal; **4-IIV MF59/AS03-adj:** quadrivalent inactivated adjuvanted with MF59/AS03 intramuscular; **4-IIV vir/lip-adj:** quadrivalent inactivated adjuvanted with virosome/liposome intramuscular; **4-RIV:** quadrivalent recombinant intramuscular; **3-LAIV:** trivalent live attenuated intranasal; **4-LAIV:** quadrivalent live attenuated intranasal.

**Adults and the elderly: Inconsistency in networks of laboratory- confirmed influenza and any systemic adverse event outcomes**

Laboratory- confirmed influenza \*

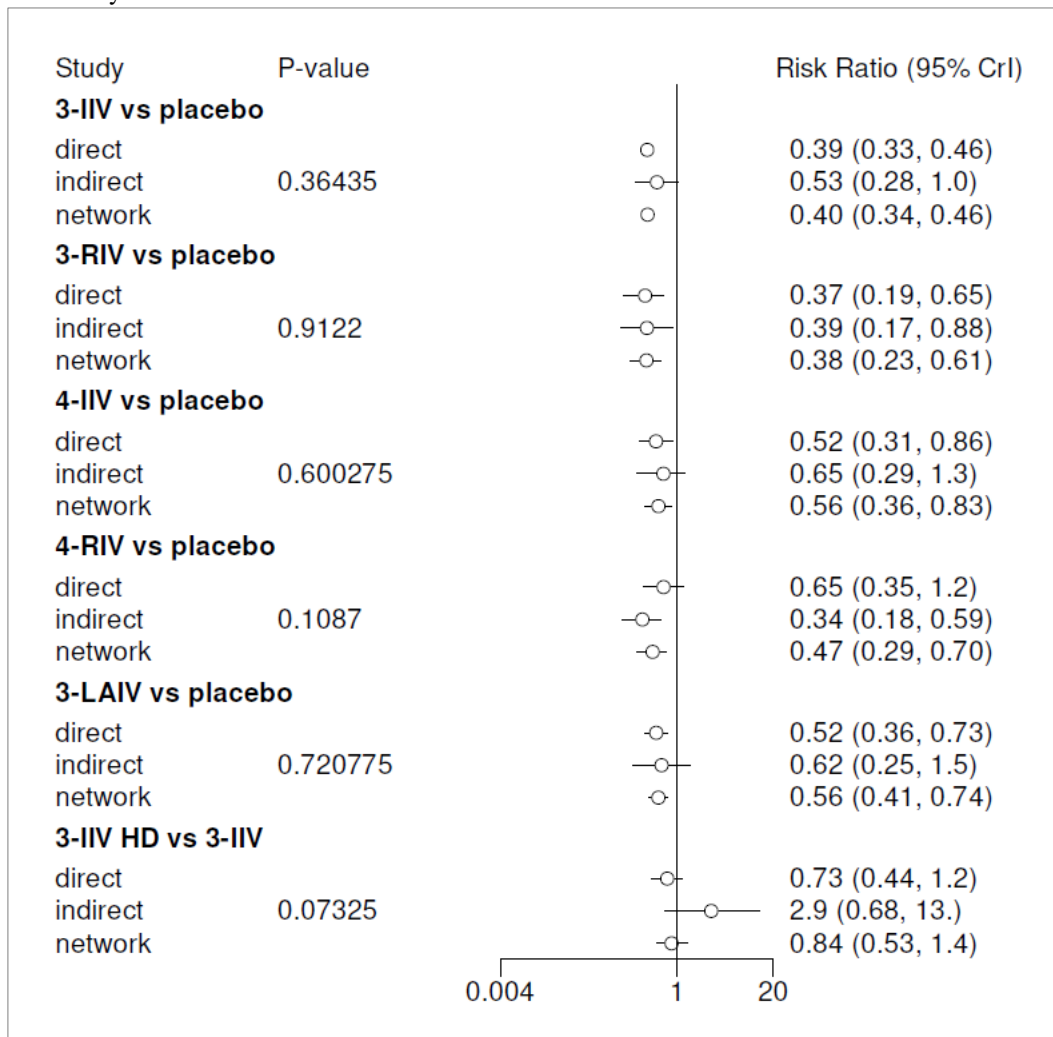

OR <1 favors experimental vaccine compared to placebo or 3-IIV

\* **Placebo:** placebo/no vaccine; **3-IIV:** trivalent inactivated intramuscular; **3-IIV HD:** trivalent inactivated high dose intramuscular; **3-IIV ID:** trivalent inactivated intradermal; **3-IIV MF59/AS03-adj:** trivalent inactivated adjuvanted with MF59/AS03 intramuscular; **3-IIV vir/lip-adj:** trivalent inactivated adjuvanted with Virosome/liposome intramuscular; **3-RIV:** trivalent recombinant intramuscular; **4-IIV:** quadrivalent inactivated intramuscular; **4-IIV HD:** quadrivalent inactivated high dose intramuscular; **4-IIV ID:** quadrivalent inactivated intradermal; **4-IIV MF59/AS03-adj:** quadrivalent inactivated adjuvanted with MF59/AS03 intramuscular; **4-IIV vir/lip-adj:** quadrivalent inactivated adjuvanted with virosome/liposome intramuscular; **4-RIV:** quadrivalent recombinant intramuscular; **3-LAIV:** trivalent live attenuated intranasal; **4-LAIV:** quadrivalent live attenuated intranasal.

Laboratory- confirmed influenza\*

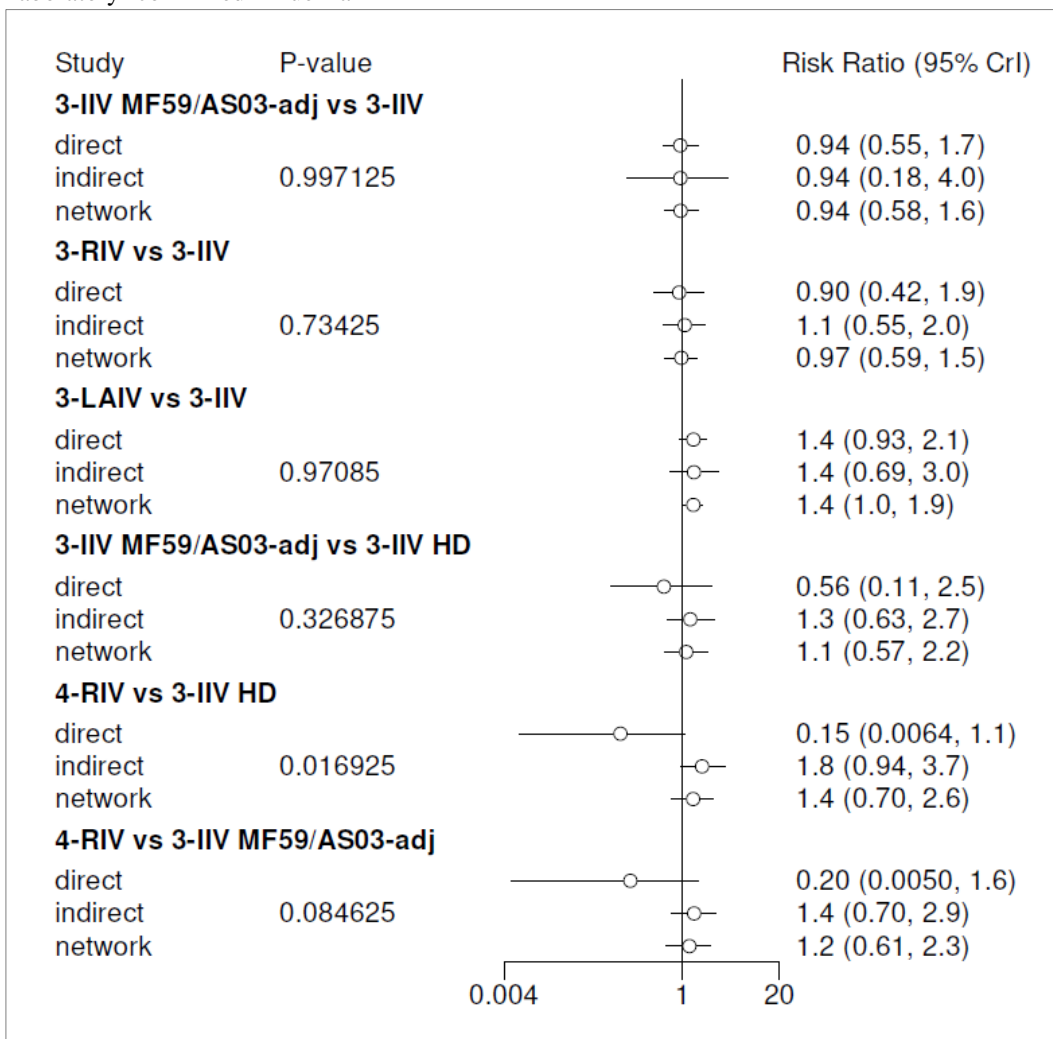

OR <1 favors experimental vaccine compared to placebo or 3-IIV

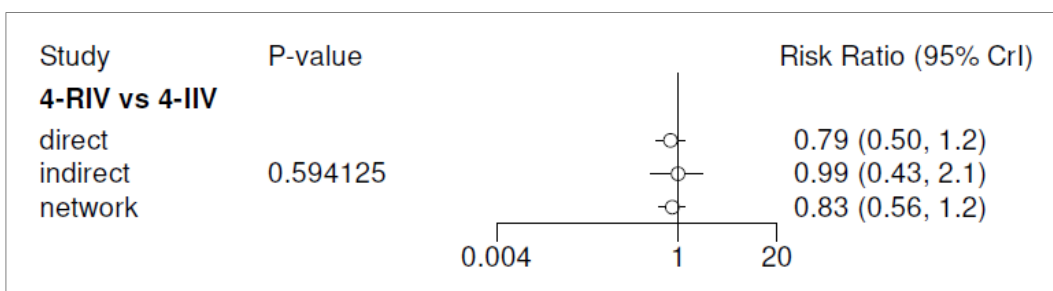

OR <1 favors experimental vaccine compared to placebo or 3-IIV

\* **Placebo:** placebo/no vaccine; **3-IIV:** trivalent inactivated intramuscular; **3-IIV HD:** trivalent inactivated high dose intramuscular; **3-IIV ID:** trivalent inactivated intradermal; **3-IIV MF59/AS03-adj:** trivalent inactivated adjuvanted with MF59/AS03 intramuscular; **3-IIV vir/lip-adj:** trivalent inactivated adjuvanted with Virosome/liposome intramuscular; **3-RIV:** trivalent recombinant intramuscular; **4-IIV:** quadrivalent inactivated intramuscular; **4-IIV HD:** quadrivalent inactivated high dose intramuscular; **4-IIV ID:** quadrivalent inactivated intradermal; **4-IIV MF59/AS03-adj:** quadrivalent inactivated adjuvanted with MF59/AS03 intramuscular; **4-IIV vir/lip-adj:** quadrivalent inactivated adjuvanted with virosome/liposome intramuscular; **4-RIV:** quadrivalent recombinant intramuscular; **3-LAIV:** trivalent live attenuated intranasal; **4-LAIV:** quadrivalent live attenuated intranasal.



Any systemic adverse event\*

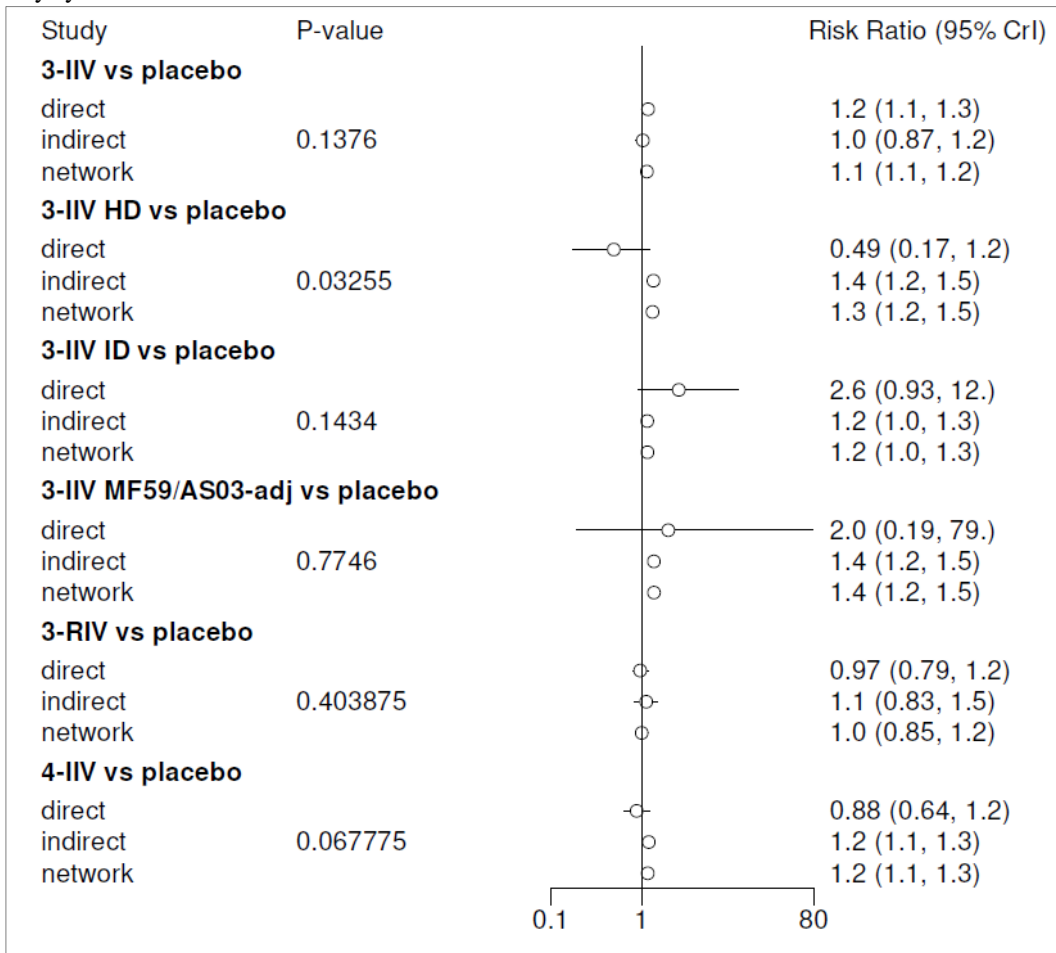

OR <1 favors experimental vaccine compared to placebo or 3-IIV

\* **Placebo:** placebo/no vaccine; **3-IIV:** trivalent inactivated intramuscular; **3-IIV HD:** trivalent inactivated high dose intramuscular; **3-IIV ID:** trivalent inactivated intradermal; **3-IIV MF59/AS03-adj:** trivalent inactivated adjuvanted with MF59/ASO3 intramuscular; **3-IIV vir/lip-adj:** trivalent inactivated adjuvanted with Virosome/liposome intramuscular; **3-RIV:** trivalent recombinant intramuscular; **4-IIV:** quadrivalent inactivated intramuscular; **4-IIV HD:** quadrivalent inactivated high dose intramuscular; **4-IIV ID:** quadrivalent inactivated intradermal; **4-IIV MF59/AS03-adj:** quadrivalent inactivated adjuvanted with MF59/ASO3 intramuscular; **4-IIV vir/lip-adj:** quadrivalent inactivated adjuvanted with virosome/liposome intramuscular; **4-RIV:** quadrivalent recombinant intramuscular; **3-LAIV:** trivalent live attenuated intranasal; **4-LAIV:** quadrivalent live attenuated intranasal.

Any systemic adverse event\*

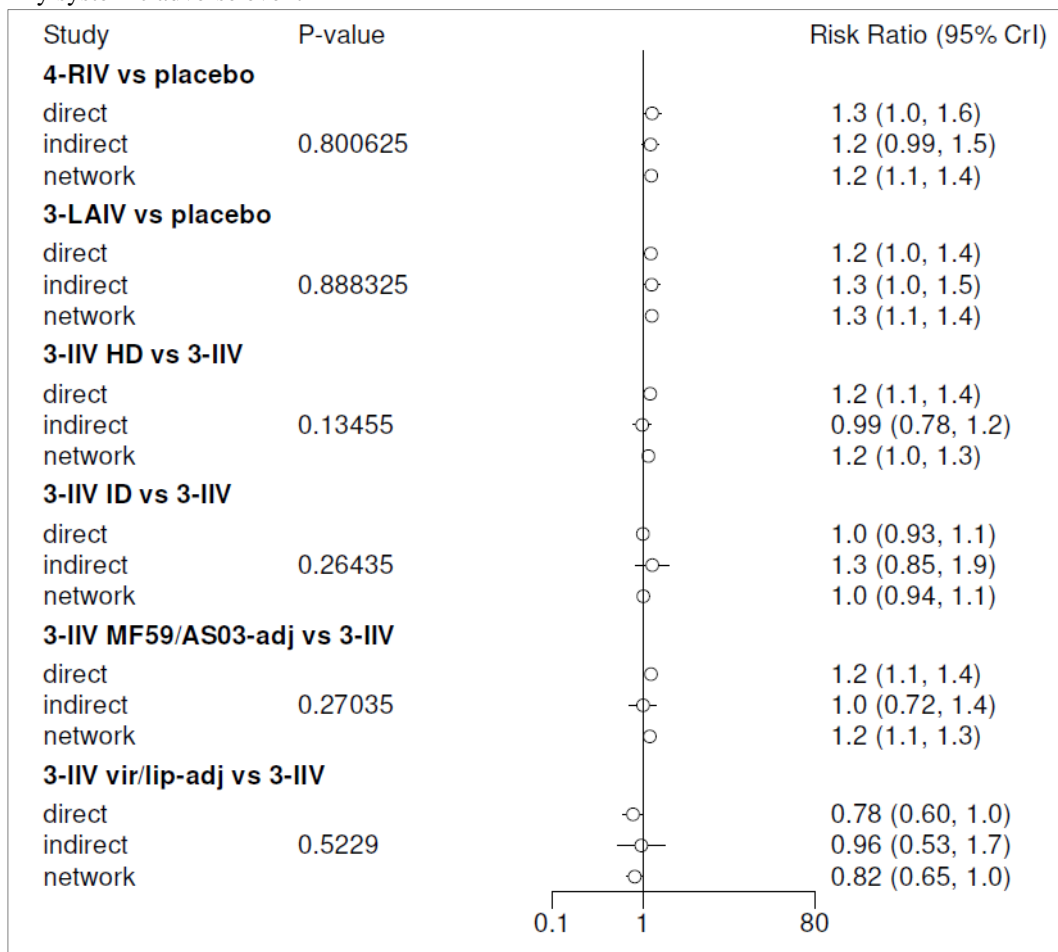

OR <1 favors experimental vaccine compared to placebo or 3-IIV

\* **Placebo:** placebo/no vaccine; **3-IIV:** trivalent inactivated intramuscular; **3-IIV HD:** trivalent inactivated high dose intramuscular; **3-IIV ID:** trivalent inactivated intradermal; **3-IIV MF59/AS03-adj:** trivalent inactivated adjuvanted with MF59/ASO3 intramuscular; **3-IIV vir/lip-adj:** trivalent inactivated adjuvanted with Virosome/liposome intramuscular; **3-RIV:** trivalent recombinant intramuscular; **4-IIV:** quadrivalent inactivated intramuscular; **4-IIV HD:** quadrivalent inactivated high dose intramuscular; **4-IIV ID:** quadrivalent inactivated intradermal; **4-IIV MF59/AS03-adj:** quadrivalent inactivated adjuvanted with MF59/ASO3 intramuscular; **4-IIV vir/lip-adj:** quadrivalent inactivated adjuvanted with virosome/liposome intramuscular; **4-RIV:** quadrivalent recombinant intramuscular; **3-LAIV:** trivalent live attenuated intranasal; **4-LAIV:** quadrivalent live attenuated intranasal.

Any systemic adverse event\*

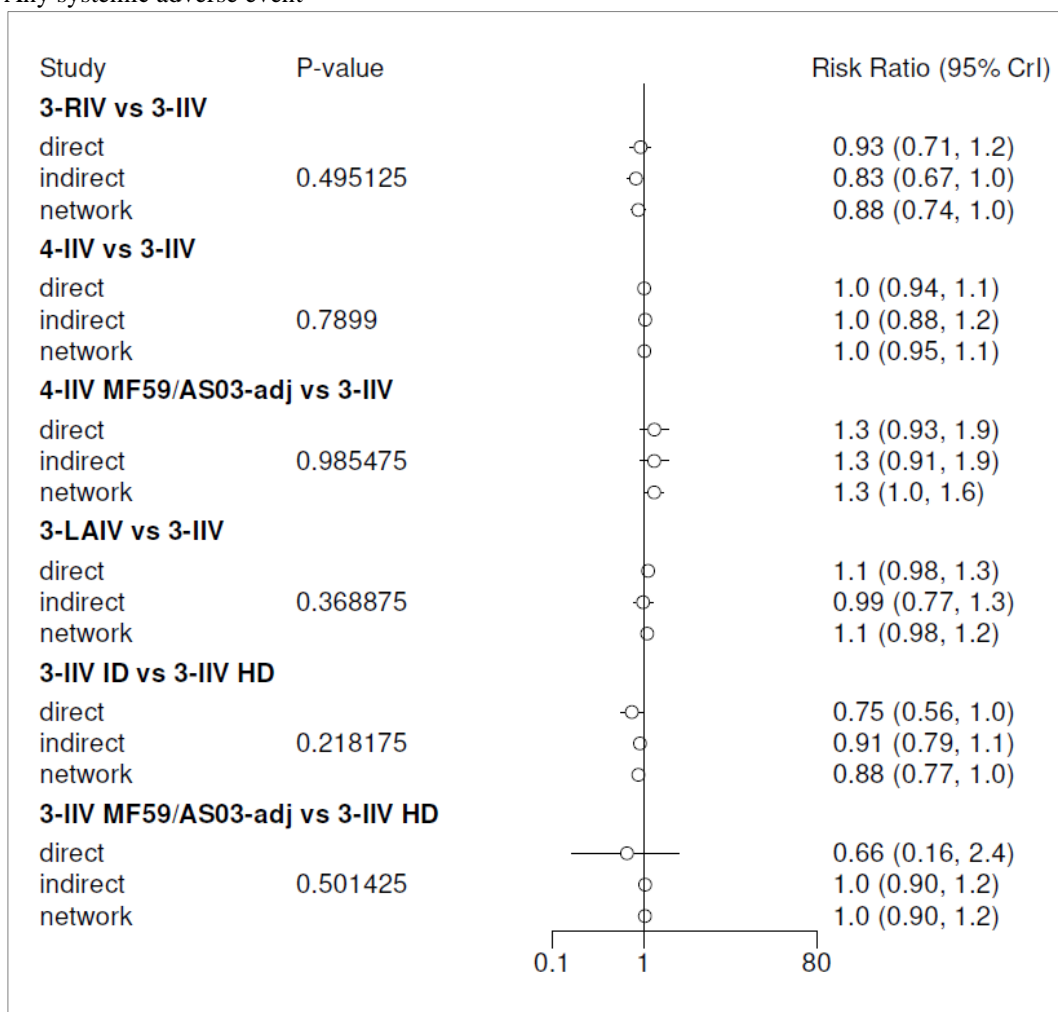

OR <1 favors experimental vaccine compared to placebo or 3-IIV

\* **Placebo:** placebo/no vaccine; **3-IIV:** trivalent inactivated intramuscular; **3-IIV HD:** trivalent inactivated high dose intramuscular; **3-IIV ID:** trivalent inactivated intradermal; **3-IIV MF59/AS03-adj:** trivalent inactivated adjuvanted with MF59/ASO3 intramuscular; **3-IIV vir/lip-adj:** trivalent inactivated adjuvanted with Virosome/liposome intramuscular; **3-RIV:** trivalent recombinant intramuscular; **4-IIV:** quadrivalent inactivated intramuscular; **4-IIV HD:** quadrivalent inactivated high dose intramuscular; **4-IIV ID:** quadrivalent inactivated intradermal; **4-IIV MF59/AS03-adj:** quadrivalent inactivated adjuvanted with MF59/ASO3 intramuscular; **4-IIV vir/lip-adj:** quadrivalent inactivated adjuvanted with virosome/liposome intramuscular; **4-RIV:** quadrivalent recombinant intramuscular; **3-LAIV:** trivalent live attenuated intranasal; **4-LAIV:** quadrivalent live attenuated intranasal.

Any systemic adverse event\*

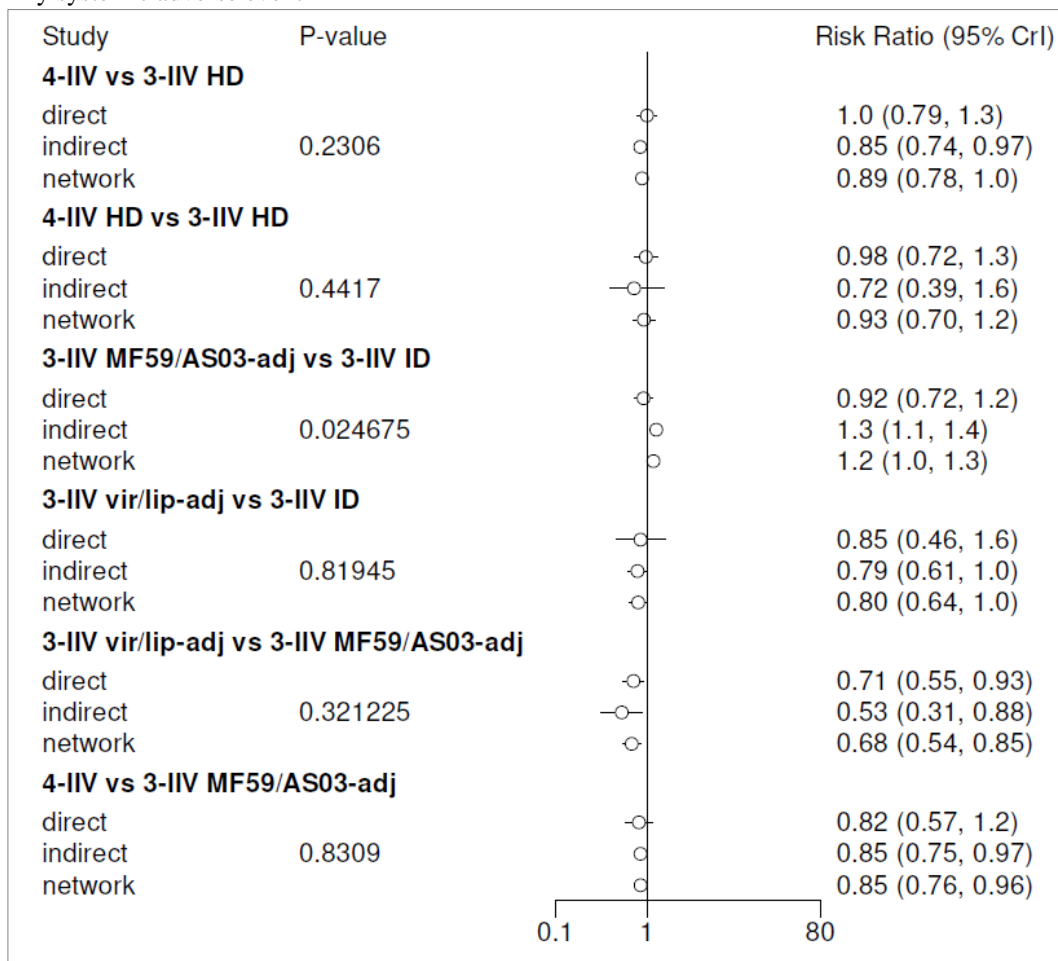

OR <1 favors experimental vaccine compared to placebo or 3-IIV

\* **Placebo:** placebo/no vaccine; **3-IIV:** trivalent inactivated intramuscular; **3-IIV HD:** trivalent inactivated high dose intramuscular; **3-IIV ID:** trivalent inactivated intradermal; **3-IIV MF59/AS03-adj:** trivalent inactivated adjuvanted with MF59/ASO3 intramuscular; **3-IIV vir/lip-adj:** trivalent inactivated adjuvanted with Virosome/liposome intramuscular; **3-RIV:** trivalent recombinant intramuscular; **4-IIV:** quadrivalent inactivated intramuscular; **4-IIV HD:** quadrivalent inactivated high dose intramuscular; **4-IIV ID:** quadrivalent inactivated intradermal; **4-IIV MF59/AS03-adj:** quadrivalent inactivated adjuvanted with MF59/ASO3 intramuscular; **4-IIV vir/lip-adj:** quadrivalent inactivated adjuvanted with virosome/liposome intramuscular; **4-RIV:** quadrivalent recombinant intramuscular; **3-LAIV:** trivalent live attenuated intranasal; **4-LAIV:** quadrivalent live attenuated intranasal.

Any systemic adverse event\*

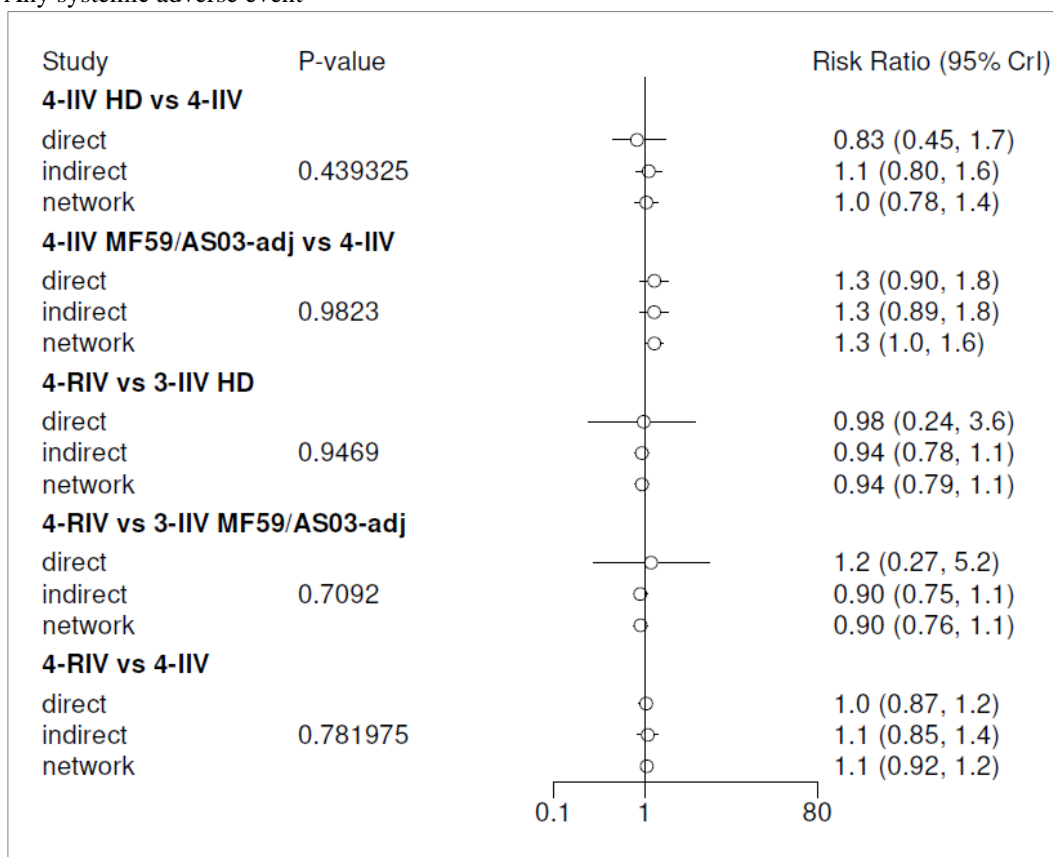

OR <1 favors experimental vaccine compared to placebo or 3-IIV

\* **Placebo:** placebo/no vaccine; **3-IIV:** trivalent inactivated intramuscular; **3-IIV HD:** trivalent inactivated high dose intramuscular; **3-IIV ID:** trivalent inactivated intradermal; **3-IIV MF59/AS03-adj:** trivalent inactivated adjuvanted with MF59/AS03 intramuscular; **3-IIV vir/lip-adj:** trivalent inactivated adjuvanted with Virosome/liposome intramuscular; **3-RIV:** trivalent recombinant intramuscular; **4-IIV:** quadrivalent inactivated intramuscular; **4-IIV HD:** quadrivalent inactivated high dose intramuscular; **4-IIV ID:** quadrivalent inactivated intradermal; **4-IIV MF59/AS03-adj:** quadrivalent inactivated adjuvanted with MF59/AS03 intramuscular; **4-IIV vir/lip-adj:** quadrivalent inactivated adjuvanted with virosome/liposome intramuscular; **4-RIV:** quadrivalent recombinant intramuscular; **3-LAIV:** trivalent live attenuated intranasal; **4-LAIV:** quadrivalent live attenuated intranasal.



**Adults and the elderly: Forest plots of laboratory- confirmed influenza, comparison with placebo/no vaccine and with 3-IIV\***

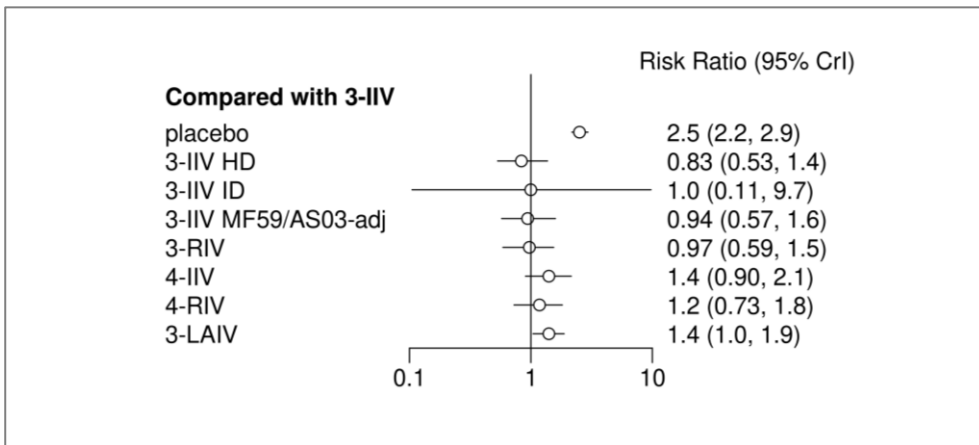

OR <1 favors experimental vaccine compared to placebo or 3-IIV

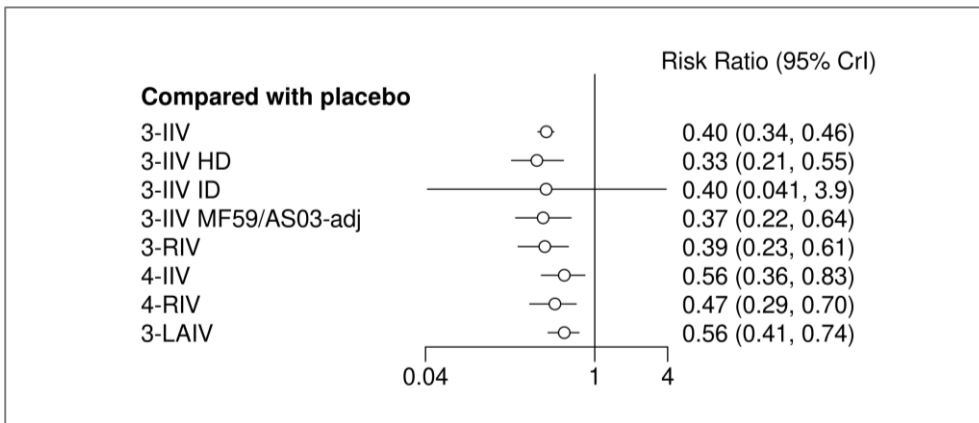

OR <1 favors experimental vaccine compared to placebo or 3-IIV

\* **Placebo:** placebo/no vaccine; **3-IIV:** trivalent inactivated intramuscular; **3-IIV HD:** trivalent inactivated high dose intramuscular; **3-IIV ID:** trivalent inactivated intradermal; **3-IIV MF59/AS03-adj:** trivalent inactivated adjuvanted with MF59/ASO3 intramuscular; **3-IIV vir/lip-adj:** trivalent inactivated adjuvanted with Virosome/liposome intramuscular; **3-RIV:** trivalent recombinant intramuscular; **4-IIV:** quadrivalent inactivated intramuscular; **4-IIV HD:** quadrivalent inactivated high dose intramuscular; **4-IIV ID:** quadrivalent inactivated intradermal; **4-IIV MF59/AS03-adj:** quadrivalent inactivated adjuvanted with MF59/ASO3 intramuscular; **4-IIV vir/lip-adj:** quadrivalent inactivated adjuvanted with virosome/liposome intramuscular; **4-RIV:** quadrivalent recombinant intramuscular; **3-LAIV:** trivalent live attenuated intranasal; **4-LAIV:** quadrivalent live attenuated intranasal.

**The elderly (≥61 years): Network geometry of laboratory -confirmed influenza\***

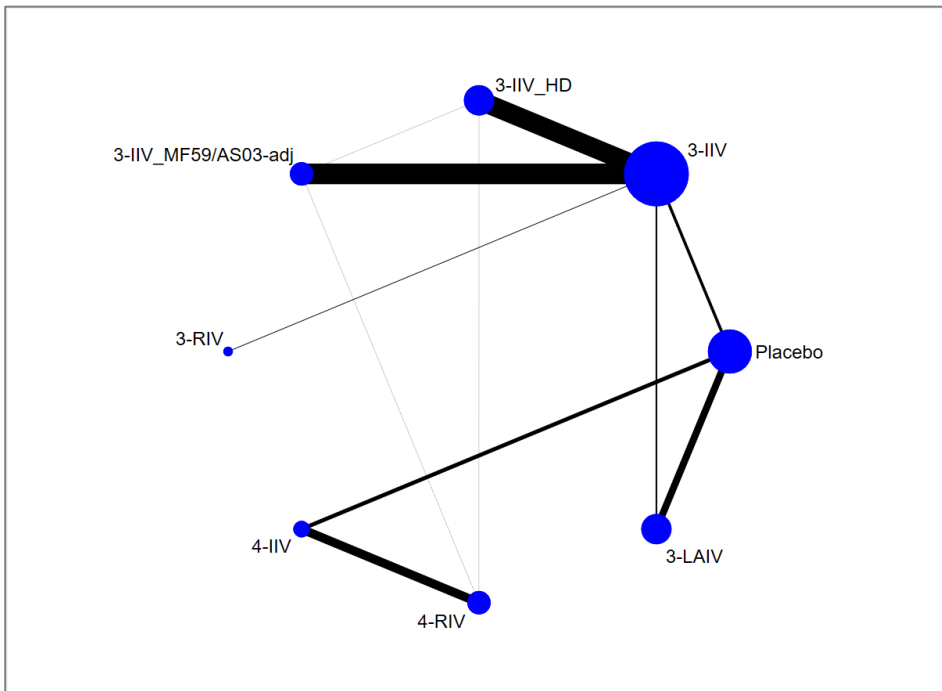

The thickness of the line is proportional to the precision of each direct estimate, and the width of each circle is proportional to the number of studies included in the treatment.

**The elderly (≥61 years): Forest plots of laboratory-confirmed influenza, comparison with placebo-no vaccine and with 3-IIV\***

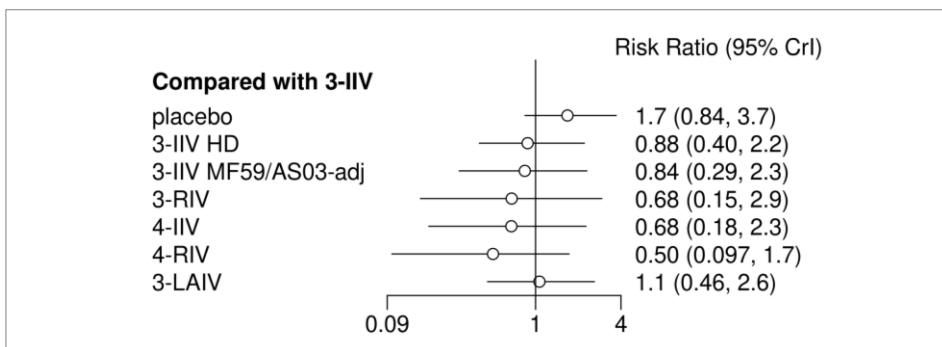

OR <1 favors experimental vaccine compared to placebo or 3-IIV

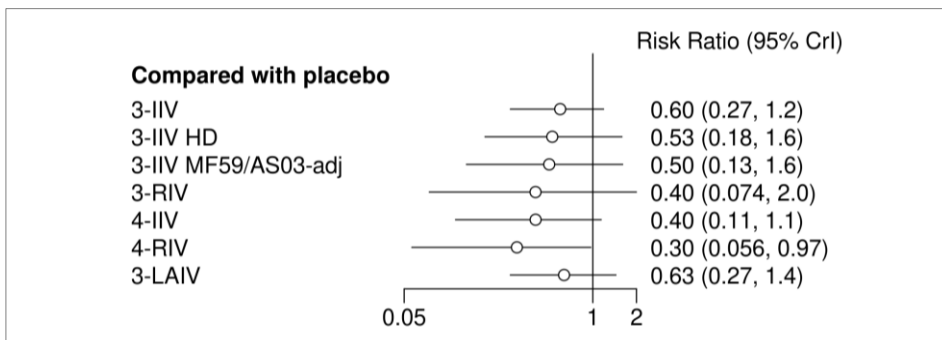

OR <1 favors experimental vaccine compared to placebo or 3-IIV

\* **Placebo:** placebo/no vaccine; **3-IIV:** trivalent inactivated intramuscular; **3-IIV HD:** trivalent inactivated high dose intramuscular; **3-IIV ID:** trivalent inactivated intradermal; **3-IIV MF59/AS03-adj:** trivalent inactivated adjuvanted with MF59/ASO3 intramuscular; **3-IIV vir/lip-adj:** trivalent inactivated adjuvanted with Virosome/liposome intramuscular; **3-RIV:** trivalent recombinant intramuscular; **4-IIV:** quadrivalent inactivated intramuscular; **4-IIV HD:** quadrivalent inactivated high dose intramuscular; **4-IIV ID:** quadrivalent inactivated intradermal; **4-IIV MF59/AS03-adj:** quadrivalent inactivated adjuvanted with MF59/ASO3 intramuscular; **4-IIV vir/lip-adj:** quadrivalent inactivated adjuvanted with virosome/liposome intramuscular; **4-RIV:** quadrivalent recombinant intramuscular; **3-LAIV:** trivalent live attenuated intranasal; **4-LAIV:** quadrivalent live attenuated intranasal.



**The elderly (≥61 years): Netleague analysis of laboratory- confirmed influenza\***

|                           |                   |                    |                            |                    |                   |                         |                    |
|---------------------------|-------------------|--------------------|----------------------------|--------------------|-------------------|-------------------------|--------------------|
| <b>placebo</b>            | 0.6 (0.27, 1.19)  | 0.53 (0.18, 1.59)  | 0.5 (0.13, 1.61)           | 0.4 (0.07, 2)      | 0.4 (0.11, 1.14)  | <b>0.3 (0.06, 0.97)</b> | 0.63 (0.27, 1.44)  |
| 1.68 (0.84, 3.7)          | <b>3-IIV</b>      | 0.88 (0.4, 2.21)   | 0.84 (0.29, 2.3)           | 0.68 (0.15, 2.93)  | 0.68 (0.18, 2.27) | 0.5 (0.1, 1.72)         | 1.06 (0.46, 2.6)   |
| 1.9 (0.63, 5.54)          | 1.14 (0.45, 2.49) | <b>3-IIV HD</b>    | 0.95 (0.27, 2.79)          | 0.76 (0.13, 3.95)  | 0.76 (0.16, 2.83) | 0.56 (0.1, 2.03)        | 1.21 (0.35, 3.84)  |
| 2 (0.62, 7.44)            | 1.19 (0.43, 3.45) | 1.05 (0.36, 3.72)  | <b>3-IIV MF59/AS03-adj</b> | 0.81 (0.14, 4.99)  | 0.81 (0.17, 3.5)  | 0.6 (0.1, 2.45)         | 1.27 (0.36, 5.06)  |
| 2.48 (0.5, 13.43)         | 1.47 (0.34, 6.48) | 1.31 (0.25, 7.67)  | 1.23 (0.2, 7.36)           | <b>3-RIV</b>       | 0.99 (0.13, 6.62) | 0.73 (0.08, 4.88)       | 1.57 (0.29, 8.96)  |
| 2.48 (0.88, 8.85)         | 1.48 (0.44, 5.66) | 1.31 (0.35, 6.31)  | 1.24 (0.29, 5.96)          | 1.01 (0.15, 7.45)  | <b>4-IIV</b>      | 0.75 (0.21, 2.02)       | 1.57 (0.43, 6.95)  |
| <b>3.34 (1.03, 17.71)</b> | 2 (0.58, 10.29)   | 1.77 (0.49, 10.42) | 1.67 (0.41, 9.63)          | 1.37 (0.21, 12.53) | 1.33 (0.49, 4.79) | <b>4-RIV</b>            | 2.12 (0.55, 12.69) |
| 1.58 (0.69, 3.71)         | 0.94 (0.38, 2.18) | 0.83 (0.26, 2.86)  | 0.79 (0.2, 2.8)            | 0.64 (0.11, 3.4)   | 0.64 (0.14, 2.3)  | 0.47 (0.08, 1.81)       | <b>3-LAIV</b>      |

The estimate is located at the intersection of the column-defining vaccine and the row-defining vaccine. Data are RRs (95% CrI). Significant results are in bold. In the upper triangle, comparisons of treatments should be read from right to left. An RR below 1 favors the medication on the bottom right vs. the medication on the top left in the diagonal.

\* **Placebo:** placebo/no vaccine; **3-IIV:** trivalent inactivated intramuscular; **3-IIV HD:** trivalent inactivated high dose intramuscular; **3-IIV ID:** trivalent inactivated intradermal; **3-IIV MF59/AS03-adj:** trivalent inactivated adjuvanted with MF59/ASO3 intramuscular; **3-IIV vir/lip-adj:** trivalent inactivated adjuvanted with Virosome/liposome intramuscular; **3-RIV:** trivalent recombinant intramuscular; **4-IIV:** quadrivalent inactivated intramuscular; **4-IIV HD:** quadrivalent inactivated high dose intramuscular; **4-IIV ID:** quadrivalent inactivated intradermal; **4-IIV MF59/AS03-adj:** quadrivalent inactivated adjuvanted with MF59/ASO3 intramuscular; **4-IIV vir/lip-adj:** quadrivalent inactivated adjuvanted with virosome/liposome intramuscular; **4-RIV:** quadrivalent recombinant intramuscular; **3-LAIV:** trivalent live attenuated intranasal; **4-LAIV:** quadrivalent live attenuated intranasal.

**Immunocompromised/cancer patients: Network geometry of laboratory -confirmed influenza\***

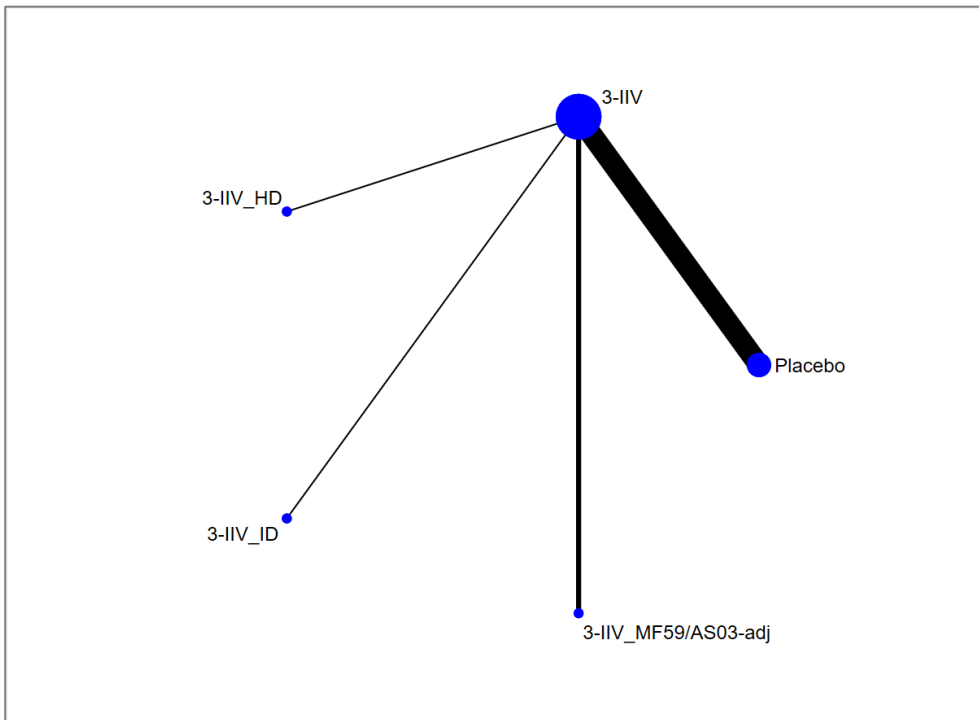

The thickness of the line is proportional to the precision of each direct estimate, and the width of each circle is proportional to the number of studies included in the treatment.

**Immunocompromised/cancer patients: Forest plots of laboratory-confirmed influenza, comparison with placebo-no vaccine and with 3-IIV\***

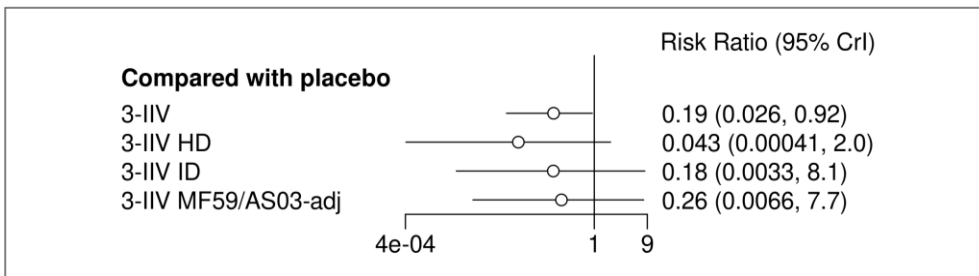

OR <1 favors experimental vaccine compared to placebo or 3-IIV

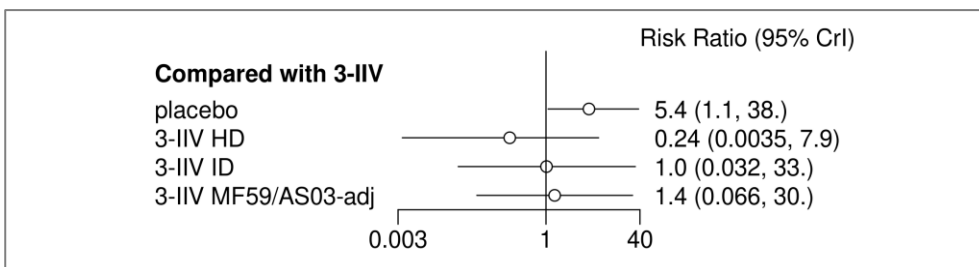

OR <1 favors experimental vaccine compared to placebo or 3-IIV

\* **Placebo:** placebo/no vaccine; **3-IIV:** trivalent inactivated intramuscular; **3-IIV HD:** trivalent inactivated high dose intramuscular; **3-IIV ID:** trivalent inactivated intradermal; **3-IIV MF59/AS03-adj:** trivalent inactivated adjuvanted with MF59/AS03 intramuscular; **3-IIV vir/lip-adj:** trivalent inactivated adjuvanted with Virosome/liposome intramuscular; **3-RIV:** trivalent recombinant intramuscular; **4-IIV:** quadrivalent inactivated intramuscular; **4-IIV HD:** quadrivalent inactivated high dose intramuscular; **4-IIV ID:** quadrivalent inactivated intradermal; **4-IIV MF59/AS03-adj:** quadrivalent inactivated adjuvanted with MF59/AS03 intramuscular; **4-IIV vir/lip-adj:** quadrivalent inactivated adjuvanted with virosome/liposome intramuscular; **4-RIV:** quadrivalent recombinant intramuscular; **3-LAIV:** trivalent live attenuated intranasal; **4-LAIV:** quadrivalent live attenuated intranasal.

**Immunocompromised/cancer patients: Netleague analysis of laboratory- confirmed influenza\***

|                          |                          |                 |                     |                            |
|--------------------------|--------------------------|-----------------|---------------------|----------------------------|
| <b>placebo</b>           | <b>0.19 (0.03, 0.92)</b> | 0.04 (0, 1.96)  | 0.18 (0, 8.1)       | 0.26 (0.01, 7.74)          |
| <b>5.4 (1.09, 37.91)</b> | <b>3-IIV</b>             | 0.24 (0, 7.89)  | 1.02 (0.03, 33.37)  | 1.4 (0.07, 29.93)          |
| 23.25 (0.51, 2439.31)    | 4.15 (0.13, 281.79)      | <b>3-IIV HD</b> | 4.45 (0.03, 938.25) | 6 (0.06, 1022.82)          |
| 5.46 (0.12, 302.8)       | 0.98 (0.03, 31.37)       | 0.22 (0, 32.15) | <b>3-IIV ID</b>     | 1.38 (0.01, 137.12)        |
| 3.9 (0.13, 152.34)       | 0.71 (0.03, 15.1)        | 0.17 (0, 17.36) | 0.73 (0.01, 70.38)  | <b>3-IIV MF59/AS03-adj</b> |

The estimate is located at the intersection of the column-defining vaccine and the row-defining vaccine. Data are RRs (95% CrI). Significant results are in bold. In the upper triangle, comparisons of treatments should be read from right to left. An RR below 1 favors the medication on the bottom right vs. the medication on the top left in the diagonal.

\* **Placebo:** placebo/no vaccine; **3-IIV:** trivalent inactivated intramuscular; **3-IIV HD:** trivalent inactivated high dose intramuscular; **3-IIV ID:** trivalent inactivated intradermal; **3-IIV MF59/AS03-adj:** trivalent inactivated adjuvanted with MF59/ASO3 intramuscular; **3-IIV vir/lip-adj:** trivalent inactivated adjuvanted with Virosome/liposome intramuscular; **3-RIV:** trivalent recombinant intramuscular; **4-IIV:** quadrivalent inactivated intramuscular; **4-IIV HD:** quadrivalent inactivated high dose intramuscular; **4-IIV ID:** quadrivalent inactivated intradermal; **4-IIV MF59/AS03-adj:** quadrivalent inactivated adjuvanted with MF59/ASO3 intramuscular; **4-IIV vir/lip-adj:** quadrivalent inactivated adjuvanted with virosome/liposome intramuscular; **4-RIV:** quadrivalent recombinant intramuscular; **3-LAIV:** trivalent live attenuated intranasal; **4-LAIV:** quadrivalent live attenuated intranasal.

**All children: Forest plots of laboratory confirmed influenza, comparison with placebo/no vaccine and with 3-IIV\***

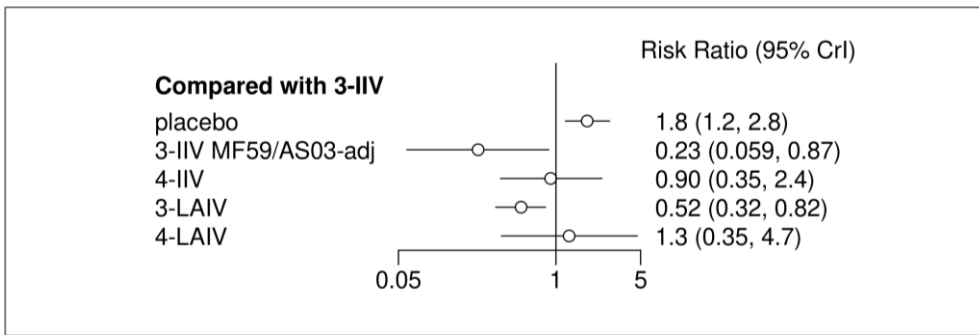

OR <1 favors experimental vaccine compared to placebo or 3-IIV

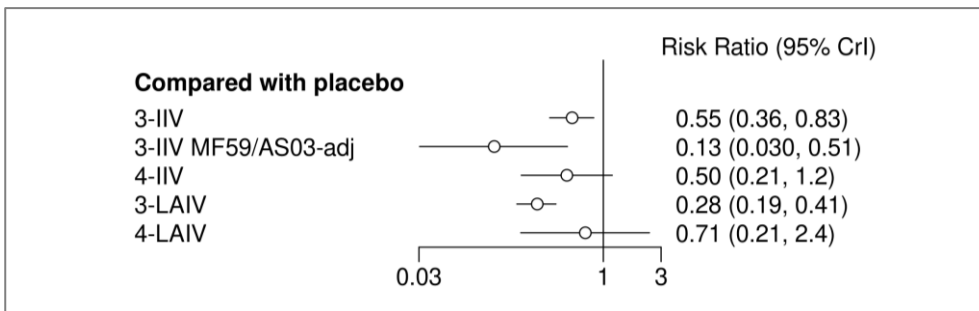

OR <1 favors experimental vaccine compared to placebo or 3-IIV

\* **Placebo:** placebo/no vaccine; **3-IIV:** trivalent inactivated intramuscular; **3-IIV HD:** trivalent inactivated high dose intramuscular; **3-IIV ID:** trivalent inactivated intradermal; **3-IIV MF59/AS03-adj:** trivalent inactivated adjuvanted with MF59/ASO3 intramuscular; **3-IIV vir/lip-adj:** trivalent inactivated adjuvanted with Virosome/liposome intramuscular; **3-RIV:** trivalent recombinant intramuscular; **4-IIV:** quadrivalent inactivated intramuscular; **4-IIV HD:** quadrivalent inactivated high dose intramuscular; **4-IIV ID:** quadrivalent inactivated intradermal; **4-IIV MF59/AS03-adj:** quadrivalent inactivated adjuvanted with MF59/ASO3 intramuscular; **4-IIV vir/lip-adj:** quadrivalent inactivated adjuvanted with virosome/liposome intramuscular; **4-RIV:** quadrivalent recombinant intramuscular; **3-LAIV:** trivalent live attenuated intranasal; **4-LAIV:** quadrivalent live attenuated intranasal.

### Children, aged ≤ 5 years: Network geometry of laboratory confirmed influenza\*

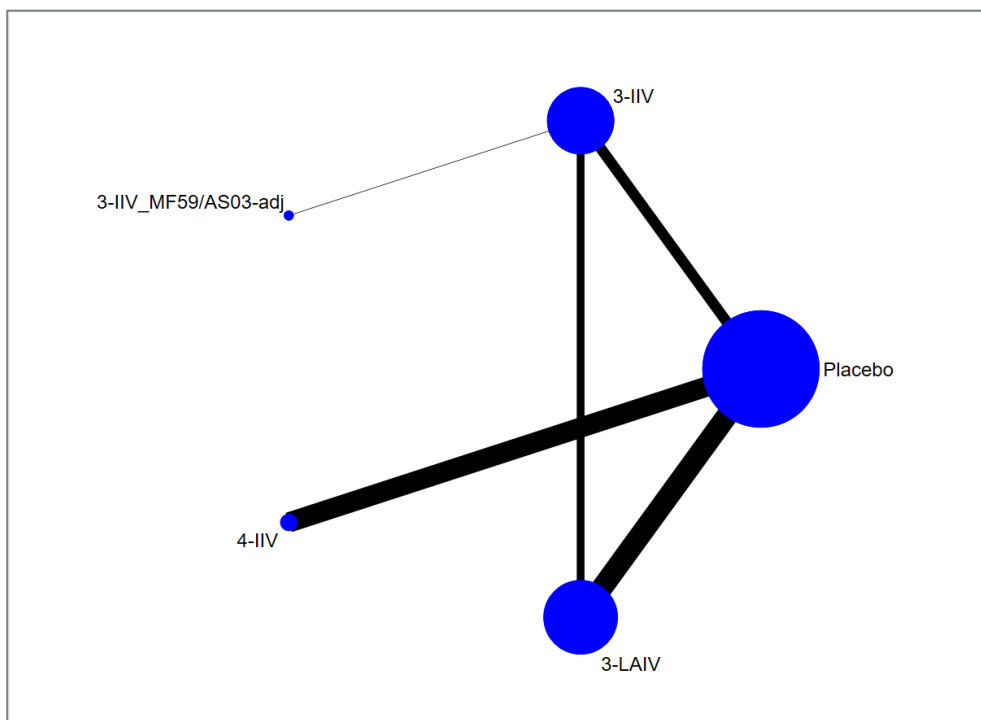

The thickness of the line is proportional to the precision of each direct estimate, and the width of each circle is proportional to the number of studies included in the treatment.

### Children, aged ≤ 5 years: Forest plots of laboratory confirmed influenza, comparison with placebo/no vaccine and with 3-IIV\*

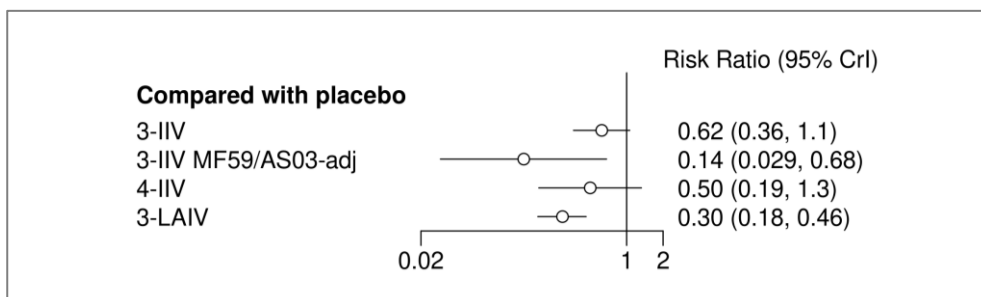

OR <1 favors experimental vaccine compared to placebo or 3-IIV

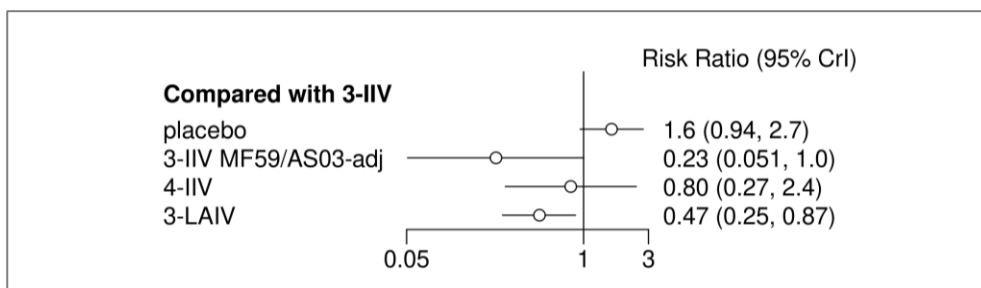

OR <1 favors experimental vaccine compared to placebo or 3-IIV

\* **Placebo:** placebo/no vaccine; **3-IIV:** trivalent inactivated intramuscular; **3-IIV HD:** trivalent inactivated high dose intramuscular; **3-IIV ID:** trivalent inactivated intradermal; **3-IIV MF59/AS03-adj:** trivalent inactivated adjuvanted with MF59/ASO3 intramuscular; **3-IIV vir/lip-adj:** trivalent inactivated adjuvanted with Virosome/liposome intramuscular; **3-RIV:** trivalent recombinant intramuscular; **4-IIV:** quadrivalent inactivated intramuscular; **4-IIV HD:** quadrivalent inactivated high dose intramuscular; **4-IIV ID:** quadrivalent inactivated intradermal; **4-IIV MF59/AS03-adj:** quadrivalent inactivated adjuvanted with MF59/ASO3 intramuscular; **4-IIV vir/lip-adj:** quadrivalent inactivated adjuvanted with virosome/liposome intramuscular; **4-RIV:** quadrivalent recombinant intramuscular; **3-LAIV:** trivalent live attenuated intranasal; **4-LAIV:** quadrivalent live attenuated intranasal.

Children, aged ≤ 5 years: Netleague analysis of laboratory confirmed influenza \*

|                          |                          |                            |                    |                          |
|--------------------------|--------------------------|----------------------------|--------------------|--------------------------|
| <b>placebo</b>           | 0.62 (0.36, 1.06)        | <b>0.14 (0.03, 0.68)</b>   | 0.5 (0.19, 1.32)   | <b>0.3 (0.18, 0.46)</b>  |
| 1.61 (0.94, 2.74)        | <b>3-IIV</b>             | 0.23 (0.05, 1)             | 0.8 (0.27, 2.44)   | <b>0.47 (0.25, 0.87)</b> |
| <b>7.07 (1.47, 34.5)</b> | 4.41 (1, 19.67)          | <b>3-IIV MF59/AS03-adj</b> | 3.55 (0.56, 22.93) | 2.09 (0.42, 10.45)       |
| 2 (0.76, 5.31)           | 1.24 (0.41, 3.76)        | 0.28 (0.04, 1.79)          | <b>4-IIV</b>       | 0.59 (0.2, 1.71)         |
| <b>3.39 (2.16, 5.41)</b> | <b>2.11 (1.15, 3.94)</b> | 0.48 (0.1, 2.41)           | 1.7 (0.58, 5.01)   | <b>3-LAIV</b>            |

The estimate is located at the intersection of the column-defining vaccine and the row-defining vaccine. Data are RRs (95% CrI). Significant results are in bold. In the upper triangle, comparisons of treatments should be read from right to left. An RR below 1 favors the medication on the bottom right vs. the medication on the top left in the diagonal.

\* **Placebo**: placebo/no vaccine; **3-IIV**: trivalent inactivated intramuscular; **3-IIV HD**: trivalent inactivated high dose intramuscular; **3-IIV ID**: trivalent inactivated intradermal; **3-IIV MF59/AS03-adj**: trivalent inactivated adjuvanted with MF59/ASO3 intramuscular; **3-IIV vir/lip-adj**: trivalent inactivated adjuvanted with Virosome/liposome intramuscular; **3-RIV**: trivalent recombinant intramuscular; **4-IIV**: quadrivalent inactivated intramuscular; **4-IIV HD**: quadrivalent inactivated high dose intramuscular; **4-IIV ID**: quadrivalent inactivated intradermal; **4-IIV MF59/AS03-adj**: quadrivalent inactivated adjuvanted with MF59/ASO3 intramuscular; **4-IIV vir/lip-adj**: quadrivalent inactivated adjuvanted with virosome/liposome intramuscular; **4-RIV**: quadrivalent recombinant intramuscular; **3-LAIV**: trivalent live attenuated intranasal; **4-LAIV**: quadrivalent live attenuated intranasal.

## Children with pre-existing respiratory diseases: Network geometry of laboratory- confirmed influenza\*

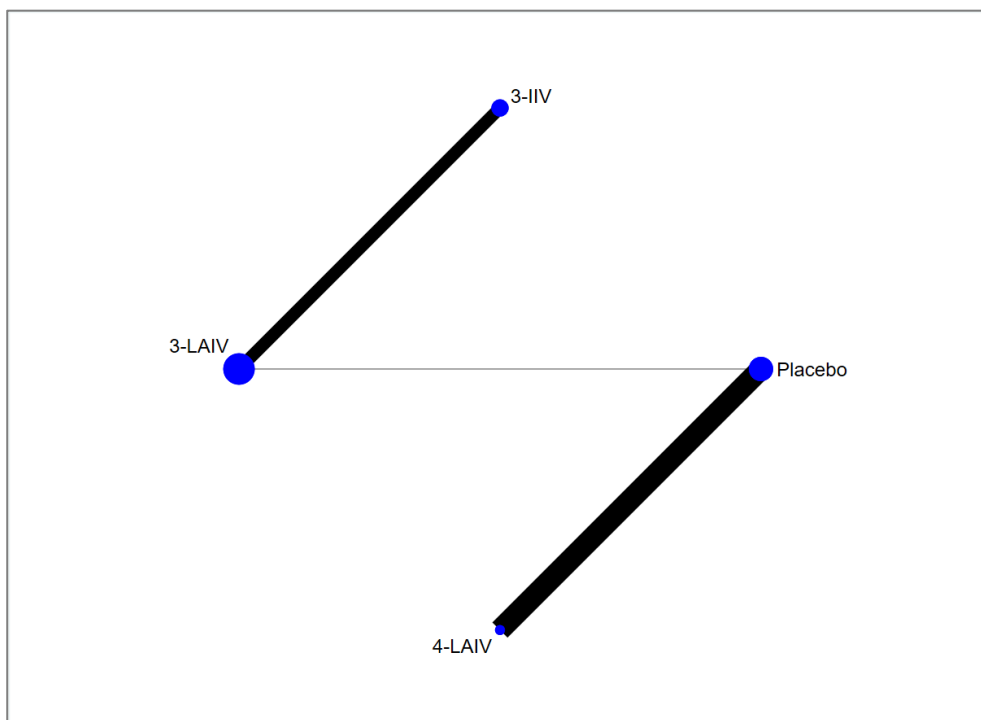

The thickness of the line is proportional to the precision of each direct estimate, and the width of each circle is proportional to the number of studies included in the treatment.

## Children with pre-existing respiratory diseases: Forest plots of laboratory confirmed influenza, comparison with placebo-no vaccine and with 3-IIV\*

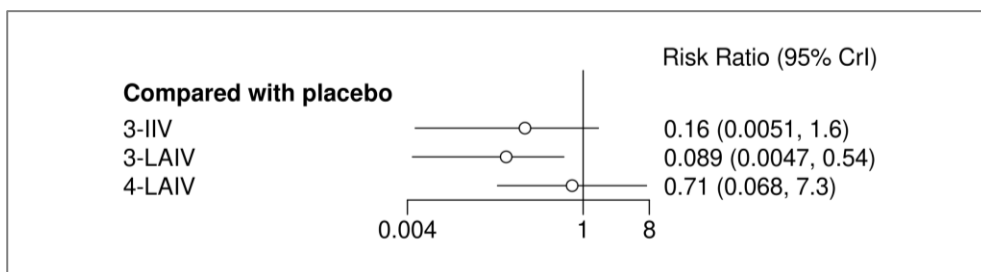

OR <1 favors experimental vaccine compared to placebo or 3-IIV

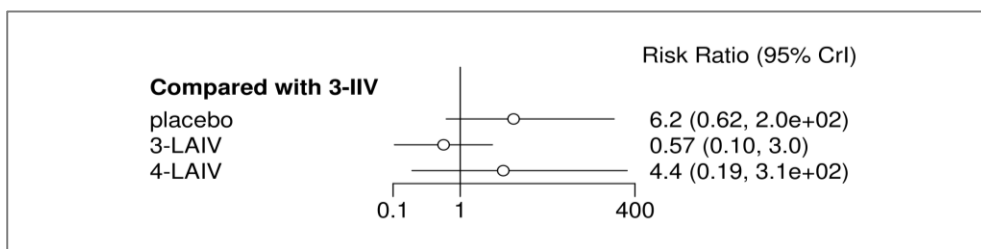

OR <1 favors experimental vaccine compared to placebo or 3-IIV

\* **Placebo:** placebo/no vaccine; **3-IIV:** trivalent inactivated intramuscular; **3-IIV HD:** trivalent inactivated high dose intramuscular; **3-IIV ID:** trivalent inactivated intradermal; **3-IIV MF59/ASO3-adj:** trivalent inactivated adjuvanted with MF59/ASO3 intramuscular; **3-IIV vir/lip-adj:** trivalent inactivated adjuvanted with Virosome/liposome intramuscular; **3-RIV:** trivalent recombinant intramuscular; **4-IIV:** quadrivalent inactivated intramuscular; **4-IIV HD:** quadrivalent inactivated high dose intramuscular; **4-IIV ID:** quadrivalent inactivated intradermal; **4-IIV MF59/ASO3-adj:** quadrivalent inactivated adjuvanted with MF59/ASO3 intramuscular; **4-IIV vir/lip-adj:** quadrivalent inactivated adjuvanted with virosome/liposome intramuscular; **4-RIV:** quadrivalent recombinant intramuscular; **3-LAIV:** trivalent live attenuated intranasal; **4-LAIV:** quadrivalent live attenuated intranasal.

**Children with pre-existing respiratory diseases: Netleague analysis of laboratory- confirmed influenza\***

|                             |                   |                       |                     |
|-----------------------------|-------------------|-----------------------|---------------------|
| <b>placebo</b>              | 0.16 (0.01, 1.61) | <b>0.09 (0, 0.54)</b> | 0.71 (0.07, 7.32)   |
| 6.23 (0.62, 195.63)         | <b>3-IIV</b>      | 0.57 (0.1, 3.01)      | 4.37 (0.19, 305.6)  |
| <b>11.23 (1.84, 213.35)</b> | 1.77 (0.33, 9.54) | <b>3-LAIV</b>         | 7.82 (0.51, 372.38) |
| 1.41 (0.14, 14.74)          | 0.23 (0, 5.22)    | 0.13 (0, 1.98)        | <b>4-LAIV</b>       |

The estimate is located at the intersection of the column-defining vaccine and the row-defining vaccine. Data are RRs (95% CrI). Significant results are in bold. In the upper triangle, comparisons of treatments should be read from right to left. An RR below 1 favors the medication on the bottom right vs. the medication on the top left in the diagonal.

\* **Placebo:** placebo/no vaccine; **3-IIV:** trivalent inactivated intramuscular; **3-IIV HD:** trivalent inactivated high dose intramuscular; **3-IIV ID:** trivalent inactivated intradermal; **3-IIV MF59/AS03-adj:** trivalent inactivated adjuvanted with MF59/AS03 intramuscular; **3-IIV vir/lip-adj:** trivalent inactivated adjuvanted with Virosome/liposome intramuscular; **3-RIV:** trivalent recombinant intramuscular; **4-IIV:** quadrivalent inactivated intramuscular; **4-IIV HD:** quadrivalent inactivated high dose intramuscular; **4-IIV ID:** quadrivalent inactivated intradermal; **4-IIV MF59/AS03-adj:** quadrivalent inactivated adjuvanted with MF59/AS03 intramuscular; **4-IIV vir/lip-adj:** quadrivalent inactivated adjuvanted with virosome/liposome intramuscular; **4-RIV:** quadrivalent recombinant intramuscular; **3-LAIV:** trivalent live attenuated intranasal; **4-LAIV:** quadrivalent live attenuated intranasal.



### Adults and the elderly: Network geometry of hospitalization rate\*

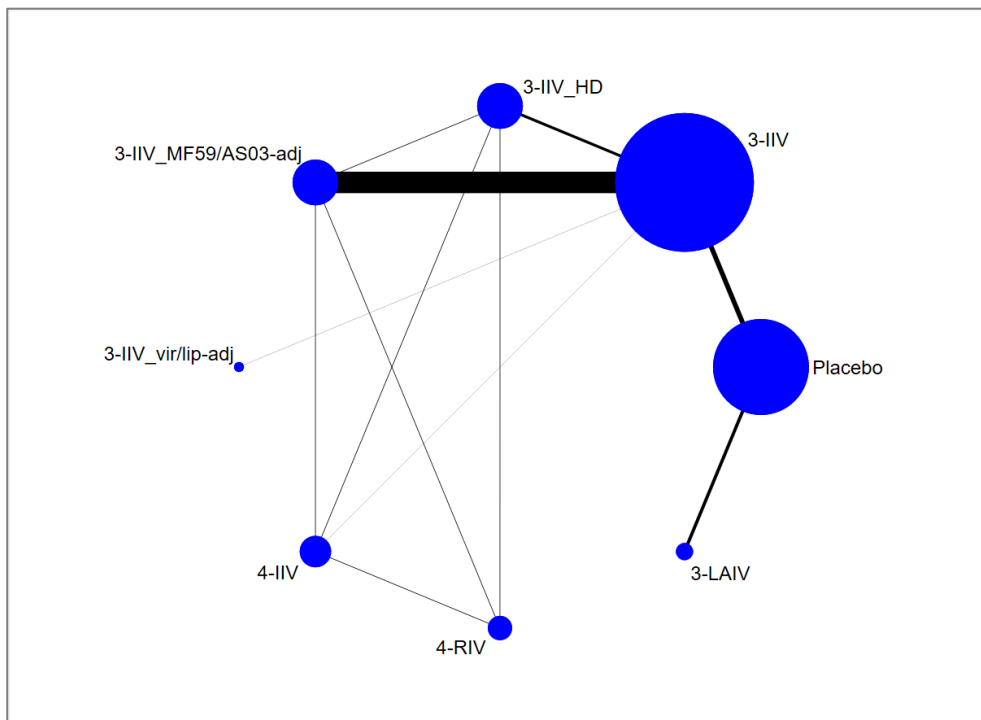

The thickness of the line is proportional to the precision of each direct estimate, and the width of each circle is proportional to the number of studies included in the treatment.

### Adults and the elderly: Forest plots of hospitalization rate, comparison with placebo-no vaccine and with 3-IIV\*

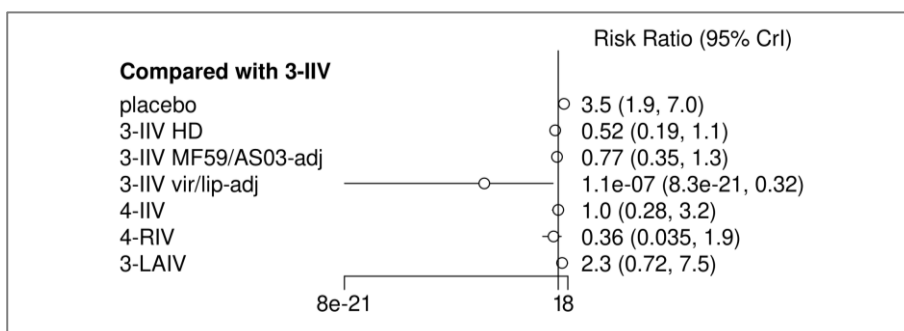

OR <1 favors experimental vaccine compared to placebo or 3-IIV

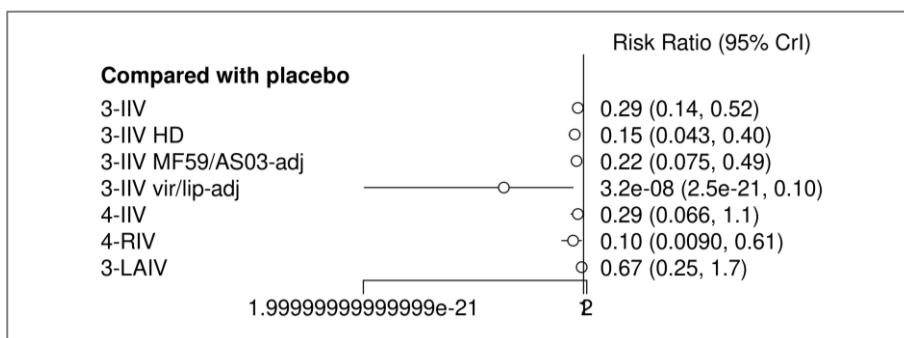

OR <1 favors experimental vaccine compared to placebo or 3-IIV

\* **Placebo**: placebo/no vaccine; **3-IIV**: trivalent inactivated intramuscular; **3-IIV HD**: trivalent inactivated high dose intramuscular; **3-IIV ID**: trivalent inactivated intradermal; **3-IIV MF59/AS03-adj**: trivalent inactivated adjuvanted with MF59/ASO3 intramuscular; **3-IIV vir/lip-adj**: trivalent inactivated adjuvanted with Virosome/liposome intramuscular; **3-RIV**: trivalent recombinant intramuscular; **4-IIV**: quadrivalent inactivated intramuscular; **4-IIV HD**: quadrivalent inactivated high dose intramuscular; **4-IIV ID**: quadrivalent inactivated intradermal; **4-IIV MF59/AS03-adj**: quadrivalent inactivated adjuvanted with MF59/ASO3 intramuscular; **4-IIV vir/lip-adj**: quadrivalent inactivated adjuvanted with virosome/liposome intramuscular; **4-RIV**: quadrivalent recombinant intramuscular; **3-LAIV**: trivalent live attenuated intranasal; **4-LAIV**: quadrivalent live attenuated intranasal.

**Adults and the elderly: Netleague analysis of hospitalization rate\***

|                                                 |                                                |                                                |                                                |                          |                                                |                                         |                                                 |
|-------------------------------------------------|------------------------------------------------|------------------------------------------------|------------------------------------------------|--------------------------|------------------------------------------------|-----------------------------------------|-------------------------------------------------|
| <b>placebo</b>                                  | <b>0.29 (0.14, 0.52)</b>                       | <b>0.15 (0.04, 0.4)</b>                        | <b>0.22 (0.08, 0.49)</b>                       | <b>0 (0, 0.1)</b>        | 0.29 (0.07, 1.06)                              | <b>0.1 (0.01, 0.61)</b>                 | 0.67 (0.25, 1.66)                               |
| <b>3.47 (1.91, 7.02)</b>                        | <b>3-IIV</b>                                   | 0.52 (0.19, 1.14)                              | 0.77 (0.35, 1.27)                              | <b>0 (0, 0.32)</b>       | 1 (0.28, 3.23)                                 | 0.36 (0.04, 1.88)                       | 2.31 (0.72, 7.54)                               |
| <b>6.76 (2.52, 23.05)</b>                       | 1.93 (0.88, 5.18)                              | <b>3-IIV HD</b>                                | 1.48 (0.56, 3.83)                              | <b>0 (0, 0.63)</b>       | 1.96 (0.57, 6.84)                              | 0.71 (0.07, 3.87)                       | <b>4.51 (1.13, 20.77)</b>                       |
| <b>4.58 (2.04, 13.33)</b>                       | 1.3 (0.79, 2.83)                               | 0.68 (0.26, 1.79)                              | <b>3-IIV MF59/AS03-adj</b>                     | <b>0 (0, 0.43)</b>       | 1.34 (0.41, 4.55)                              | 0.48 (0.05, 2.61)                       | 3.06 (0.83, 12.62)                              |
| <b>30972861.93 (9.94, 4.04665306984859e+20)</b> | <b>8944012.79 (3.11, 1.19969832201764e+20)</b> | <b>4505391.98 (1.59, 66663854240978468864)</b> | <b>6471391.46 (2.35, 91274048805280546816)</b> | <b>3-IIV vir/lip-adj</b> | <b>9063508.09 (2.86, 1.25859629335449e+20)</b> | 3210895.96 (0.91, 46301058464736493568) | <b>21054113.46 (5.47, 2.87605336845292e+20)</b> |
| 3.46 (0.94, 15.13)                              | 1 (0.31, 3.53)                                 | 0.51 (0.15, 1.74)                              | 0.75 (0.22, 2.46)                              | <b>0 (0, 0.35)</b>       | <b>4-IIV</b>                                   | 0.36 (0.04, 2.06)                       | 2.29 (0.45, 12.93)                              |
| <b>9.72 (1.64, 110.92)</b>                      | 2.76 (0.53, 28.46)                             | 1.41 (0.26, 13.75)                             | 2.07 (0.38, 20.33)                             | <b>0 (0, 1.1)</b>        | 2.75 (0.48, 27.71)                             | <b>4-RIV</b>                            | 6.45 (0.86, 91.74)                              |
| 1.5 (0.6, 4.07)                                 | 0.43 (0.13, 1.39)                              | <b>0.22 (0.05, 0.89)</b>                       | 0.33 (0.08, 1.2)                               | <b>0 (0, 0.18)</b>       | 0.44 (0.08, 2.23)                              | 0.16 (0.01, 1.16)                       | <b>3-LAIV</b>                                   |

The estimate is located at the intersection of the column-defining vaccine and the row-defining vaccine. Data are RRs (95% CrI). Significant results are in bold. In the upper triangle, comparisons of treatments should be read from right to left. An RR below 1 favors the medication on the bottom right vs. the medication on the top left in the diagonal.

\* **Placebo**: placebo/no vaccine; **3-IIV**: trivalent inactivated intramuscular; **3-IIV HD**: trivalent inactivated high dose intramuscular; **3-IIV ID**: trivalent inactivated intradermal; **3-IIV MF59/AS03-adj**: trivalent inactivated adjuvanted with MF59/ASO3 intramuscular; **3-IIV vir/lip-adj**: trivalent inactivated adjuvanted with Virosome/liposome intramuscular; **3-RIV**: trivalent recombinant intramuscular; **4-IIV**: quadrivalent inactivated intramuscular; **4-IIV HD**: quadrivalent inactivated high dose intramuscular; **4-IIV ID**: quadrivalent inactivated intradermal; **4-IIV MF59/AS03-adj**: quadrivalent inactivated adjuvanted with MF59/ASO3 intramuscular; **4-IIV vir/lip-adj**: quadrivalent inactivated adjuvanted with virosome/liposome intramuscular; **4-RIV**: quadrivalent recombinant intramuscular; **3-LAIV**: trivalent live attenuated intranasal; **4-LAIV**: quadrivalent live attenuated intranasal.

**All children: Network geometry of hospitalization rate\***

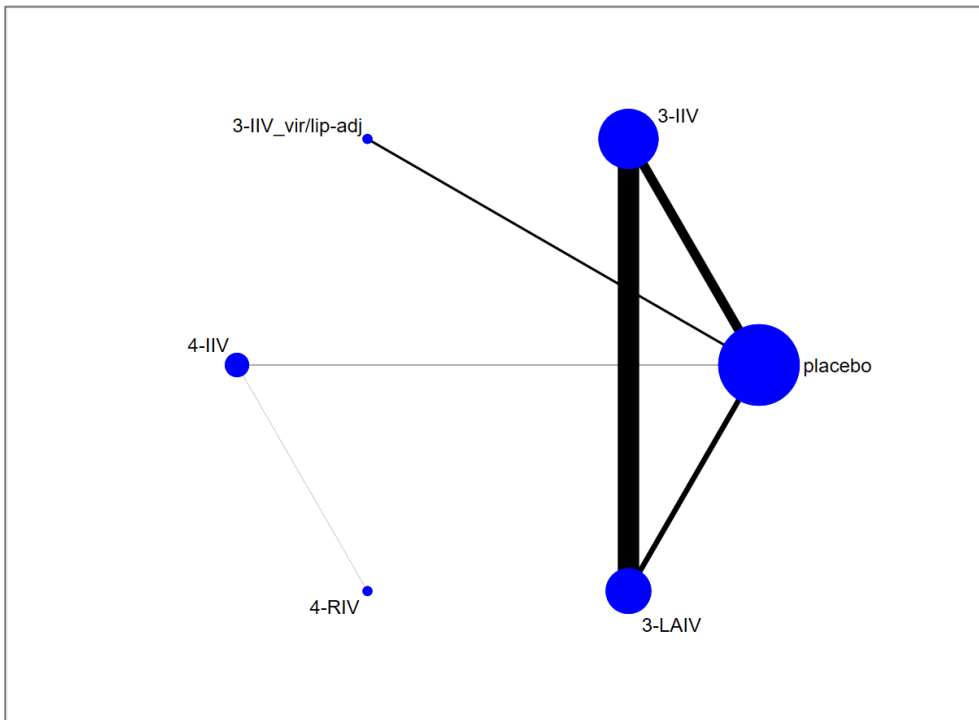

The thickness of the line is proportional to the precision of each direct estimate, and the width of each circle is proportional to the number of studies included in the treatment.

**All children: Forest plots of hospitalization rate, comparison with placebo/no vaccine and with 3-IIV\***

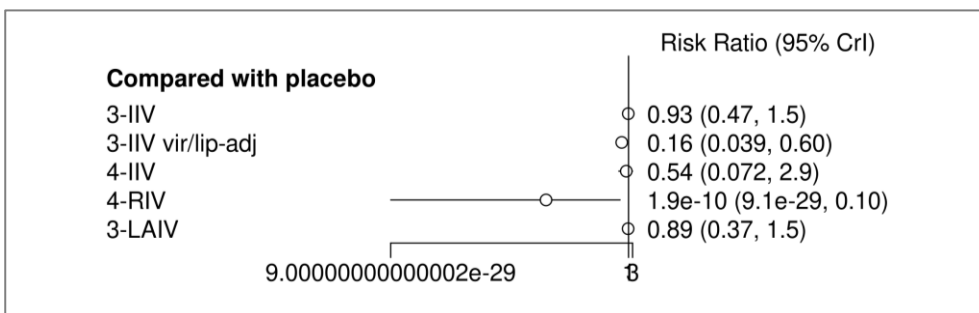

OR <1 favors experimental vaccine compared to placebo or 3-IIV

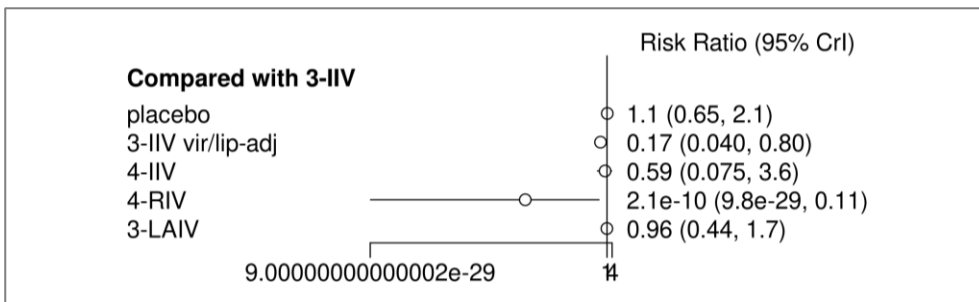

OR <1 favors experimental vaccine compared to placebo or 3-IIV

\* **Placebo:** placebo/no vaccine; **3-IIV:** trivalent inactivated intramuscular; **3-IIV HD:** trivalent inactivated high dose intramuscular; **3-IIV ID:** trivalent inactivated intradermal; **3-IIV MF59/AS03-adj:** trivalent inactivated adjuvanted with MF59/AS03 intramuscular; **3-IIV vir/lip-adj:** trivalent inactivated adjuvanted with Virosome/liposome intramuscular; **3-RIV:** trivalent recombinant intramuscular; **4-IIV:** quadrivalent inactivated intramuscular; **4-IIV HD:** quadrivalent inactivated high dose intramuscular; **4-IIV ID:** quadrivalent inactivated intradermal; **4-IIV MF59/AS03-adj:** quadrivalent inactivated adjuvanted with MF59/AS03 intramuscular; **4-IIV vir/lip-adj:** quadrivalent inactivated adjuvanted with virosome/liposome intramuscular; **4-RIV:** quadrivalent recombinant intramuscular; **3-LAIV:** trivalent live attenuated intranasal; **4-LAIV:** quadrivalent live attenuated intranasal.

All children. Netleague analysis of hospitalization rate\*

|                                                 |                                                   |                                                  |                                                   |                    |                                                   |
|-------------------------------------------------|---------------------------------------------------|--------------------------------------------------|---------------------------------------------------|--------------------|---------------------------------------------------|
| <b>placebo</b>                                  | 0.93 (0.47, 1.55)                                 | <b>0.16 (0.04, 0.6)</b>                          | 0.54 (0.07, 2.94)                                 | <b>0 (0, 0.1)</b>  | 0.89 (0.37, 1.53)                                 |
| 1.08 (0.65, 2.11)                               | <b>3-IIIV</b>                                     | <b>0.17 (0.04, 0.8)</b>                          | 0.59 (0.08, 3.57)                                 | <b>0 (0, 0.11)</b> | 0.96 (0.44, 1.72)                                 |
| <b>6.33 (1.66, 25.63)</b>                       | <b>5.9 (1.25, 24.81)</b>                          | <b>3-IIIV vir/lip-adj</b>                        | 3.46 (0.29, 29.68)                                | <b>0 (0, 0.69)</b> | <b>5.65 (1.04, 22.7)</b>                          |
| 1.84 (0.34, 13.92)                              | 1.7 (0.28, 13.29)                                 | 0.29 (0.03, 3.46)                                | <b>4-IIIV</b>                                     | <b>0 (0, 0.17)</b> | 1.61 (0.24, 12.28)                                |
| <b>5340664028.94 (9.96, 1.096985824046e+28)</b> | <b>4814636394.71 (8.84, 1.01619959257508e+28)</b> | <b>807035612.15 (1.45, 1.63374882187751e+27)</b> | <b>2736904700.67 (5.74, 5.91394639740442e+27)</b> | <b>4-RIV</b>       | <b>4404777933.57 (8.32, 8.91148853023516e+27)</b> |
| 1.12 (0.65, 2.73)                               | 1.04 (0.58, 2.3)                                  | <b>0.18 (0.04, 0.97)</b>                         | 0.62 (0.08, 4.11)                                 | <b>0 (0, 0.12)</b> | <b>3-LAIV</b>                                     |

The estimate is located at the intersection of the column-defining vaccine and the row-defining vaccine. Data are RRs (95% CrI). Significant results are in bold. In the upper triangle, comparisons of treatments should be read from right to left. An RR below 1 favors the medication on the bottom right vs. the medication on the top left in the diagonal.

\* **Placebo**: placebo/no vaccine; **3-IIIV**: trivalent inactivated intramuscular; **3-IIIV HD**: trivalent inactivated high dose intramuscular; **3-IIIV ID**: trivalent inactivated intradermal; **3-IIIV MF59/ASO3-adj**: trivalent inactivated adjuvanted with MF59/ASO3 intramuscular; **3-IIIV vir/lip-adj**: trivalent inactivated adjuvanted with Virosome/liposome intramuscular; **3-RIV**: trivalent recombinant intramuscular; **4-IIIV**: quadrivalent inactivated intramuscular; **4-IIIV HD**: quadrivalent inactivated high dose intramuscular; **4-IIIV ID**: quadrivalent inactivated intradermal; **4-IIIV MF59/ASO3-adj**: quadrivalent inactivated adjuvanted with MF59/ASO3 intramuscular; **4-IIIV vir/lip-adj**: quadrivalent inactivated adjuvanted with virosome/liposome intramuscular; **4-RIV**: quadrivalent recombinant intramuscular; **3-LAIV**: trivalent live attenuated intranasal; **4-LAIV**: quadrivalent live attenuated intranasal.

**Adults and the elderly: Network geometry of mortality of any cause\***

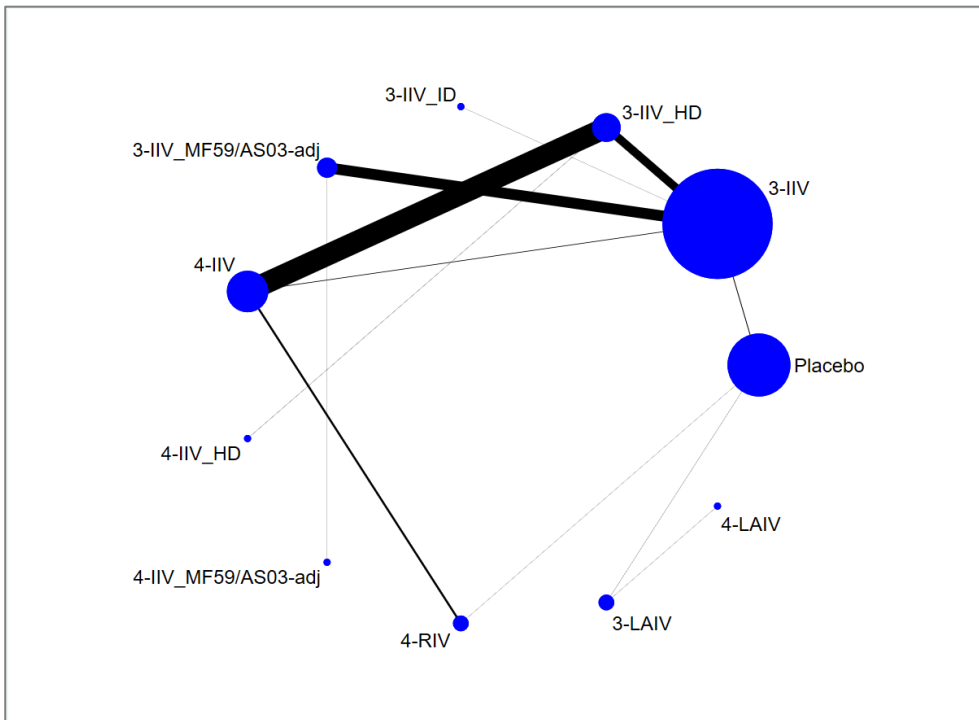

The thickness of the line is proportional to the precision of each direct estimate, and the width of each circle is proportional to the number of studies included in the treatment.

\* **Placebo:** placebo/no vaccine; **3-IIV:** trivalent inactivated intramuscular; **3-IIV HD:** trivalent inactivated high dose intramuscular; **3-IIV ID:** trivalent inactivated intradermal; **3-IIV MF59/AS03-adj:** trivalent inactivated adjuvanted with MF59/ASO3 intramuscular; **3-IIV vir/lip-adj:** trivalent inactivated adjuvanted with Virosome/liposome intramuscular; **3-RIV:** trivalent recombinant intramuscular; **4-IIV:** quadrivalent inactivated intramuscular; **4-IIV HD:** quadrivalent inactivated high dose intramuscular; **4-IIV ID:** quadrivalent inactivated intradermal; **4-IIV MF59/AS03-adj:** quadrivalent inactivated adjuvanted with MF59/ASO3 intramuscular; **4-IIV vir/lip-adj:** quadrivalent inactivated adjuvanted with virosome/liposome intramuscular; **4-RIV:** quadrivalent recombinant intramuscular; **3-LAIV:** trivalent live attenuated intranasal; **4-LAIV:** quadrivalent live attenuated intranasal.

**Adults and the elderly: Forest plots of mortality of any cause, comparison with placebo/no vaccine and with 3-IIV\***

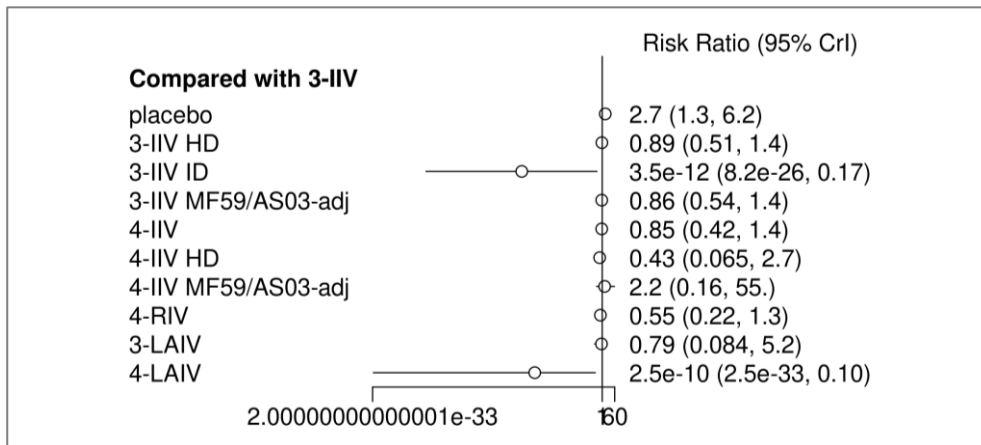

OR <1 favors experimental vaccine compared to placebo or 3-IIV

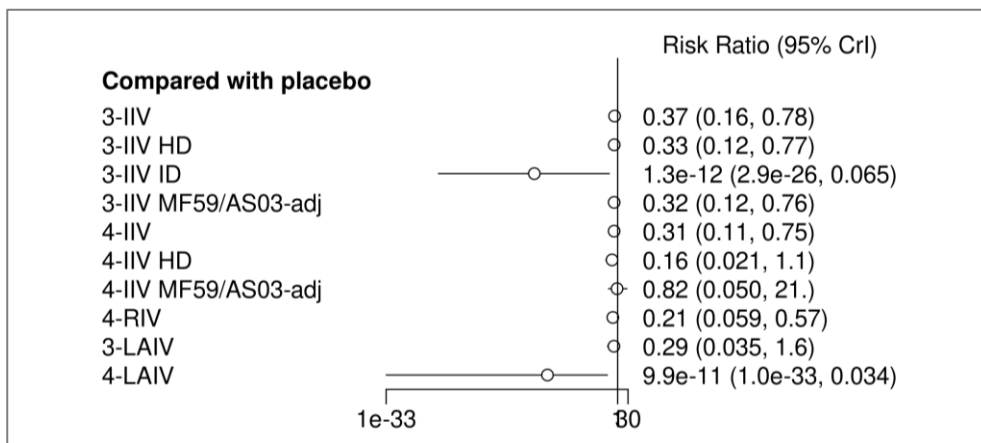

OR <1 favors experimental vaccine compared to placebo or 3-IIV

\* **Placebo:** placebo/no vaccine; **3-IIV:** trivalent inactivated intramuscular; **3-IIV HD:** trivalent inactivated high dose intramuscular; **3-IIV ID:** trivalent inactivated intradermal; **3-IIV MF59/AS03-adj:** trivalent inactivated adjuvanted with MF59/ASO3 intramuscular; **3-IIV vir/lip-adj:** trivalent inactivated adjuvanted with Virosome/liposome intramuscular; **3-RIV:** trivalent recombinant intramuscular; **4-IIV:** quadrivalent inactivated intramuscular; **4-IIV HD:** quadrivalent inactivated high dose intramuscular; **4-IIV ID:** quadrivalent inactivated intradermal; **4-IIV MF59/AS03-adj:** quadrivalent inactivated adjuvanted with MF59/ASO3 intramuscular; **4-IIV vir/lip-adj:** quadrivalent inactivated adjuvanted with virosome/liposome intramuscular; **4-RIV:** quadrivalent recombinant intramuscular; **3-LAIV:** trivalent live attenuated intranasal; **4-LAIV:** quadrivalent live attenuated intranasal.

Adults and the elderly: Netleague analysis of mortality of any cause\*

|                                                       |                                                      |                                                      |                                |                                                     |                                                      |                                                      |                                                        |                                                      |                                                      |                                |
|-------------------------------------------------------|------------------------------------------------------|------------------------------------------------------|--------------------------------|-----------------------------------------------------|------------------------------------------------------|------------------------------------------------------|--------------------------------------------------------|------------------------------------------------------|------------------------------------------------------|--------------------------------|
| <b>placebo</b>                                        | <b>0.37 (0.16, 0.78)</b>                             | <b>0.33 (0.12, 0.77)</b>                             | <b>0 (0, 0.06)</b>             | <b>0.32 (0.12, 0.76)</b>                            | <b>0.31 (0.11, 0.75)</b>                             | 0.16 (0.02, 1.08)                                    | 0.82 (0.05, 20.72)                                     | <b>0.21 (0.06, 0.57)</b>                             | 0.29 (0.04, 1.56)                                    | <b>0 (0, 0.03)</b>             |
| <b>2.71 (1.28, 6.22)</b>                              | <b>3-IIIV</b>                                        | 0.89 (0.51, 1.37)                                    | <b>0 (0, 0.17)</b>             | 0.86 (0.54, 1.43)                                   | 0.85 (0.42, 1.43)                                    | 0.43 (0.07, 2.69)                                    | 2.19 (0.16, 54.78)                                     | 0.55 (0.22, 1.26)                                    | 0.79 (0.08, 5.2)                                     | <b>0 (0, 0.1)</b>              |
| <b>3.07 (1.3, 8.25)</b>                               | 1.12 (0.73, 1.95)                                    | <b>3-IIIV HD</b>                                     | <b>0 (0, 0.2)</b>              | 0.95 (0.53, 2.1)                                    | 0.96 (0.53, 1.52)                                    | 0.49 (0.08, 2.91)                                    | 2.51 (0.17, 64.74)                                     | 0.62 (0.26, 1.4)                                     | 0.9 (0.09, 6.36)                                     | <b>0 (0, 0.12)</b>             |
| <b>757095718859.98 (15.39, 3.4977133063661 6e+25)</b> | <b>286187249246.17 (5.75, 1.2259799445561 8e+25)</b> | <b>245802862233.05 (4.94, 1.1925140100424 6e+25)</b> | <b>3-IIIV IDI</b>              | <b>251621058355.28 (5.08, 1.0878170368198 e+25)</b> | <b>227098867929.96 (4.81, 1.1084348584561 5e+25)</b> | <b>107043896605.87 (2.76, 9.9675391695237 7e+24)</b> | <b>1019261265498.1 4 (9.64, 4.7501169914977 3e+25)</b> | <b>148531142519.75 (3.17, 7.8568984830688 9e+24)</b> | <b>286361211425.39 (4.15, 1.5165521766662 3e+25)</b> | 3.29 (0, 56397557097022 73024) |
| <b>3.16 (1.32, 8.12)</b>                              | 1.17 (0.7, 1.85)                                     | 1.05 (0.48, 1.9)                                     | <b>0 (0, 0.2)</b>              | <b>3-IIIV MF59/AS03-adj</b>                         | 0.99 (0.4, 1.91)                                     | 0.5 (0.07, 3.29)                                     | 2.53 (0.19, 60.55)                                     | 0.64 (0.22, 1.62)                                    | 0.92 (0.09, 6.38)                                    | <b>0 (0, 0.12)</b>             |
| <b>3.2 (1.34, 9.33)</b>                               | 1.18 (0.7, 2.38)                                     | 1.05 (0.66, 1.89)                                    | <b>0 (0, 0.21)</b>             | 1.01 (0.52, 2.52)                                   | <b>4-IIIV</b>                                        | 0.52 (0.08, 3.38)                                    | 2.65 (0.18, 71.89)                                     | 0.66 (0.33, 1.3)                                     | 0.95 (0.1, 7.05)                                     | <b>0 (0, 0.13)</b>             |
| 6.36 (0.93, 48.16)                                    | 2.31 (0.37, 15.35)                                   | 2.04 (0.34, 12.32)                                   | <b>0 (0, 0.36)</b>             | 1.99 (0.3, 14.2)                                    | 1.93 (0.3, 12.39)                                    | <b>4-IIIV-HD</b>                                     | 5.19 (0.21, 217.7)                                     | 1.28 (0.18, 9.28)                                    | 1.78 (0.1, 26.11)                                    | <b>0 (0, 0.27)</b>             |
| 1.22 (0.05, 19.84)                                    | 0.46 (0.02, 6.32)                                    | 0.4 (0.02, 5.93)                                     | <b>0 (0, 0.1)</b>              | 0.4 (0.02, 5.18)                                    | 0.38 (0.01, 5.54)                                    | 0.19 (0, 4.78)                                       | <b>4-IIIV MF59/AS03-adj</b>                            | 0.25 (0.01, 4.04)                                    | 0.33 (0.01, 9.06)                                    | <b>0 (0, 0.07)</b>             |
| <b>4.86 (1.74, 16.81)</b>                             | 1.81 (0.8, 4.62)                                     | 1.61 (0.72, 3.78)                                    | <b>0 (0, 0.32)</b>             | 1.55 (0.62, 4.65)                                   | 1.52 (0.77, 3)                                       | 0.78 (0.11, 5.66)                                    | 4.07 (0.25, 116.16)                                    | <b>4-RIV</b>                                         | 1.44 (0.14, 11.53)                                   | <b>0 (0, 0.2)</b>              |
| 3.42 (0.64, 28.48)                                    | 1.27 (0.19, 11.86)                                   | 1.12 (0.16, 10.95)                                   | <b>0 (0, 0.24)</b>             | 1.09 (0.16, 10.92)                                  | 1.06 (0.14, 10.5)                                    | 0.56 (0.04, 9.63)                                    | 3 (0.11, 132.65)                                       | 0.69 (0.09, 7.17)                                    | <b>3-LAIV</b>                                        | <b>0 (0, 0.12)</b>             |
| <b>10107830726.22 (29.6, 9.5580916052585 4e+32)</b>   | <b>4076335867.09 (9.74, 3.9244379676983 4e+32)</b>   | <b>3601897655.47 (8.1, 3.8375142539474 e+32)</b>     | 0.3 (0, 5.2880740316551 7e+21) | <b>3562104292.46 (8.34, 3.2587760706471 9e+32)</b>  | <b>3365344196.61 (7.45, 3.6440765384085 2e+32)</b>   | <b>1795204173.83 (3.73, 1.8667492740111 8e+32)</b>   | <b>15586288987.02 (14.99, 1.3674335239756 7e+33)</b>   | <b>2241877333.4 (5.11, 2.4142977531005 5e+32)</b>    | <b>2707506275.43 (8.65, 1.9352925184977 2e+32)</b>   | <b>4-LAIV</b>                  |

The estimate is located at the intersection of the column-defining vaccine and the row-defining vaccine. Data are RRs (95% CrI). Significant results are in bold. In the upper triangle, comparisons of treatments should be read from right to left. An RR below 1 favors the medication on the bottom right vs. the medication on the top left in the diagonal.

\* **Placebo**: placebo/no vaccine; **3-IIIV**: trivalent inactivated intramuscular; **3-IIIV HD**: trivalent inactivated high dose intramuscular; **3-IIIV ID**: trivalent inactivated intradermal; **3-IIIV MF59/AS03-adj**: trivalent inactivated adjuvanted with MF59/AS03 intramuscular; **3-IIIV vir/lip-adj**: trivalent inactivated adjuvanted with Virosome/liposome intramuscular; **3-RIV**: trivalent recombinant intramuscular; **4-IIIV**: quadrivalent inactivated intramuscular; **4-IIIV HD**: quadrivalent inactivated high dose intramuscular; **4-IIIV ID**: quadrivalent inactivated intradermal; **4-IIIV MF59/AS03-adj**: quadrivalent inactivated adjuvanted with MF59/AS03 intramuscular; **4-IIIV vir/lip-adj**: quadrivalent inactivated adjuvanted with virosome/liposome intramuscular; **4-RIV**: quadrivalent recombinant intramuscular; **3-LAIV**: trivalent live attenuated intranasal; **4-LAIV**: quadrivalent live attenuated intranasal.

**All children: Network geometry of mortality of any cause\***

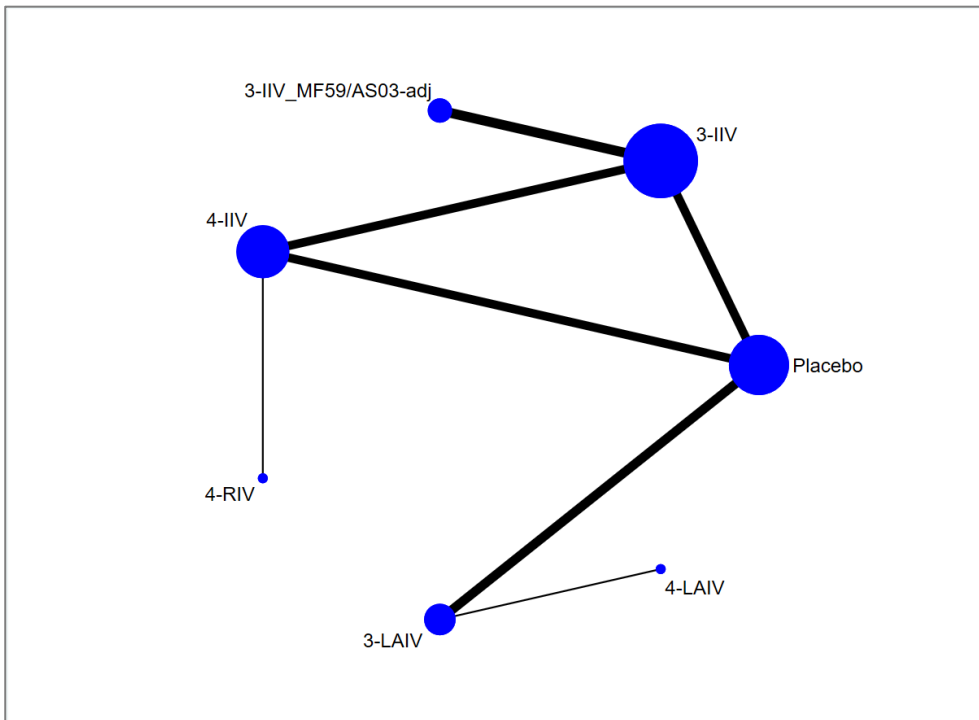

The thickness of the line is proportional to the precision of each direct estimate, and the width of each circle is proportional to the number of studies included in the treatment.

**All children: Forest plots of mortality of any cause, comparison with placebo/no vaccine and with 3-IIV\***

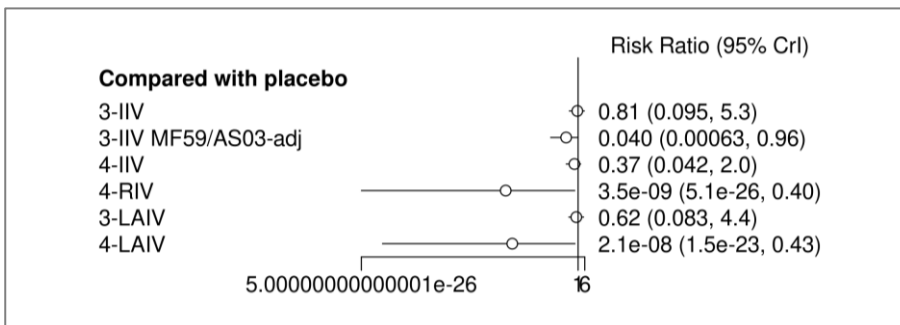

OR <1 favors experimental vaccine compared to placebo or 3-IIV

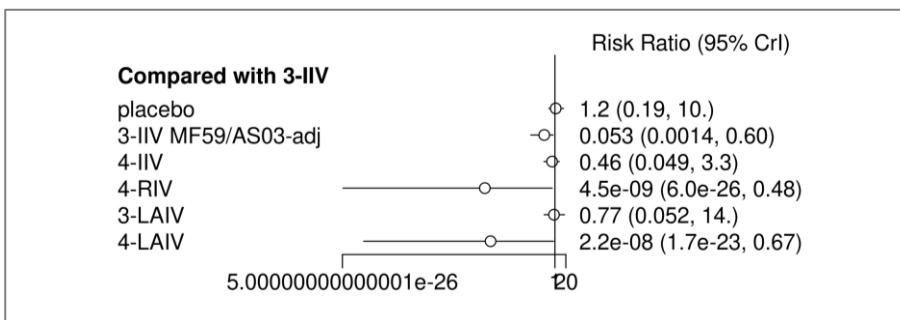

OR <1 favors experimental vaccine compared to placebo or 3-IIV

\* **Placebo:** placebo/no vaccine; **3-IIV:** trivalent inactivated intramuscular; **3-IIV HD:** trivalent inactivated high dose intramuscular; **3-IIV ID:** trivalent inactivated intradermal; **3-IIV MF59/AS03-adj:** trivalent inactivated adjuvanted with MF59/ASO3 intramuscular; **3-IIV vir/lip-adj:** trivalent inactivated adjuvanted with Virosome/liposome intramuscular; **3-RIV:** trivalent recombinant intramuscular; **4-IIV:** quadrivalent inactivated intramuscular; **4-IIV HD:** quadrivalent inactivated high dose intramuscular; **4-IIV ID:** quadrivalent inactivated intradermal; **4-IIV MF59/AS03-adj:** quadrivalent inactivated adjuvanted with MF59/ASO3 intramuscular; **4-IIV vir/lip-adj:** quadrivalent inactivated adjuvanted with virosome/liposome intramuscular; **4-RIV:** quadrivalent recombinant intramuscular; **3-LAIV:** trivalent live attenuated intranasal; **4-LAIV:** quadrivalent live attenuated intranasal.



All children: Netleague analysis of mortality of any cause\*

|                                                  |                                                  |                                          |                                                 |                             |                                                  |                               |
|--------------------------------------------------|--------------------------------------------------|------------------------------------------|-------------------------------------------------|-----------------------------|--------------------------------------------------|-------------------------------|
| <b>placebo</b>                                   | 0.81 (0.1, 5.29)                                 | <b>0.04 (0, 0.96)</b>                    | 0.37 (0.04, 1.99)                               | <b>0 (0, 0.4)</b>           | 0.62 (0.08, 4.4)                                 | <b>0 (0, 0.43)</b>            |
| 1.23 (0.19, 10.48)                               | <b>3-IIV</b>                                     | <b>0.05 (0, 0.6)</b>                     | 0.46 (0.05, 3.31)                               | <b>0 (0, 0.48)</b>          | 0.77 (0.05, 13.81)                               | <b>0 (0, 0.67)</b>            |
| <b>24.98 (1.04, 1590.74)</b>                     | <b>18.73 (1.67, 733.69)</b>                      | <b>3-IIV MF59/AS03-adj</b>               | 9.16 (0.32, 495.19)                             | 0 (0, 15.98)                | 15.68 (0.38, 1503.99)                            | 0 (0, 23.08)                  |
| 2.67 (0.5, 24.07)                                | 2.17 (0.3, 20.38)                                | 0.11 (0, 3.17)                           | <b>4-IIV</b>                                    | <b>0 (0, 0.85)</b>          | 1.66 (0.13, 33.67)                               | 0 (0, 1.52)                   |
| <b>282779832.13 (2.48, 1.94616517443502e+25)</b> | <b>221298718.92 (2.09, 1.67813234994266e+25)</b> | 10423201.26 (0.06, 8.60967118893389e+23) | <b>95951450.43 (1.18, 5.93571191264789e+24)</b> | <b>4-RIV</b>                | <b>178659206.29 (1.36, 1.14939258421012e+25)</b> | 7.51 (0, 4489974184834196992) |
| 1.61 (0.23, 11.99)                               | 1.3 (0.07, 19.33)                                | 0.06 (0, 2.66)                           | 0.6 (0.03, 7.46)                                | <b>0 (0, 0.74)</b>          | <b>3 LAIV</b>                                    | <b>0 (0, 0.55)</b>            |
| <b>48385226.43 (2.31, 6.76804260880723e+22)</b>  | <b>46155629.06 (1.49, 5.95182453746959e+22)</b>  | 1897383.53 (0.04, 4.9873964888541e+21)   | 21705948.16 (0.66, 2.73166229700137e+22)        | 0.13 (0, 19521316104692516) | <b>32696951.53 (1.83, 3.64266067903709e+22)</b>  | <b>4 LAIV</b>                 |

The estimate is located at the intersection of the column-defining vaccine and the row-defining vaccine. Data are RRs (95% CrI). Significant results are in bold. In the upper triangle, comparisons of treatments should be read from right to left. An RR below 1 favors the medication on the bottom right vs. the medication on the top left in the diagonal.

\* **Placebo**: placebo/no vaccine; **3-IIV**: trivalent inactivated intramuscular; **3-IIV HD**: trivalent inactivated high dose intramuscular; **3-IIV ID**: trivalent inactivated intradermal; **3-IIV MF59/AS03-adj**: trivalent inactivated adjuvanted with MF59/ASO3 intramuscular; **3-IIV vir/lip-adj**: trivalent inactivated adjuvanted with Virosome/liposome intramuscular; **3-RIV**: trivalent recombinant intramuscular; **4-IIV**: quadrivalent inactivated intramuscular; **4-IIV HD**: quadrivalent inactivated high dose intramuscular; **4-IIV ID**: quadrivalent inactivated intradermal; **4-IIV MF59/AS03-adj**: quadrivalent inactivated adjuvanted with MF59/ASO3 intramuscular; **4-IIV vir/lip-adj**: quadrivalent inactivated adjuvanted with virosome/liposome intramuscular; **4-RIV**: quadrivalent recombinant intramuscular; **3-LAIV**: trivalent live attenuated intranasal; **4-LAIV**: quadrivalent live attenuated intranasal.

**Adults and the elderly: Network geometry of Influenza like Illness (ILI) \***

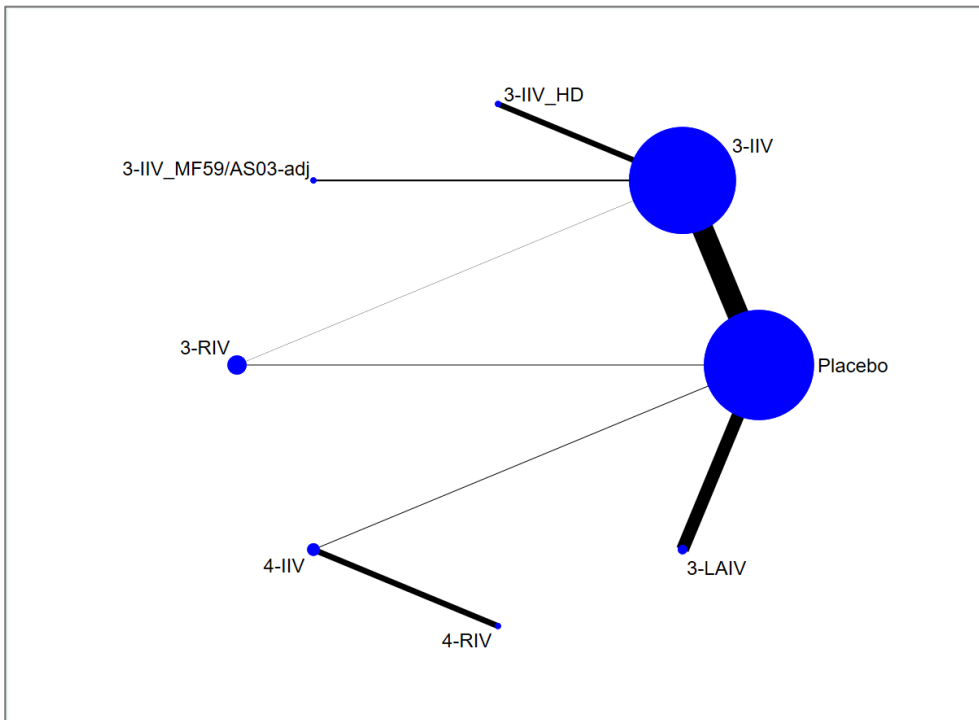

The thickness of the line is proportional to the precision of each direct estimate, and the width of each circle is proportional to the number of studies included in the treatment.

**Adults and the elderly: Forest plot of ILI, comparison with placebo/no vaccine and with 3-IIV\***

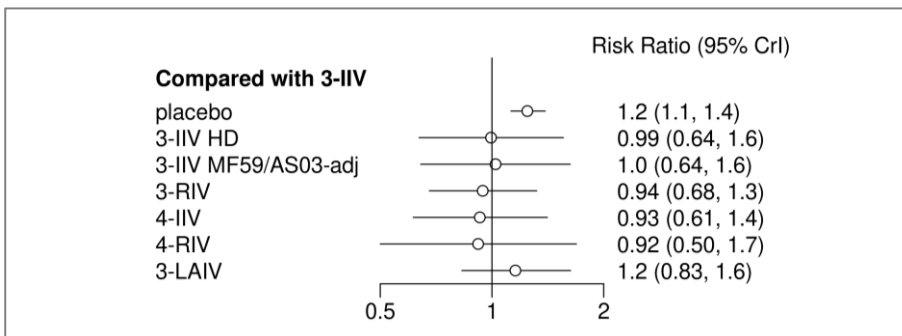

OR <1 favors experimental vaccine compared to placebo or 3-IIV

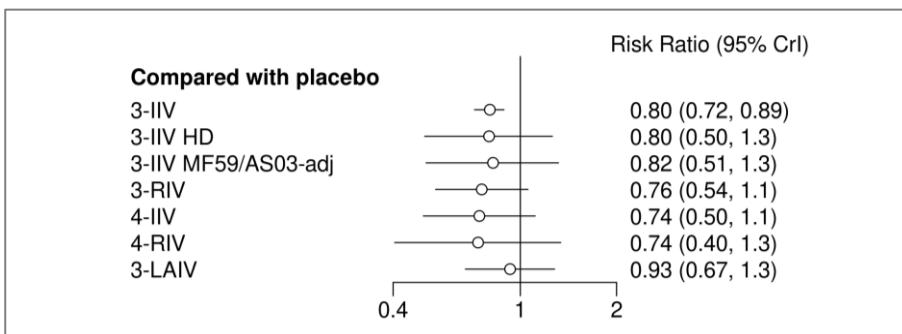

OR <1 favors experimental vaccine compared to placebo or 3-IIV

\* **Placebo:** placebo/no vaccine; **3-IIV:** trivalent inactivated intramuscular; **3-IIV HD:** trivalent inactivated high dose intramuscular; **3-IIV ID:** trivalent inactivated intradermal; **3-IIV MF59/AS03-adj:** trivalent inactivated adjuvanted with MF59/ASO3 intramuscular; **3-IIV vir/lip-adj:** trivalent inactivated adjuvanted with Virosome/liposome intramuscular; **3-RIV:** trivalent recombinant intramuscular; **4-IIV:** quadrivalent inactivated intramuscular; **4-IIV HD:** quadrivalent inactivated high dose intramuscular; **4-IIV ID:** quadrivalent inactivated intradermal; **4-IIV MF59/AS03-adj:** quadrivalent inactivated adjuvanted with MF59/ASO3 intramuscular; **4-IIV vir/lip-adj:** quadrivalent inactivated adjuvanted with virosome/liposome intramuscular; **4-RIV:** quadrivalent recombinant intramuscular; **3-LAIV:** trivalent live attenuated intranasal; **4-LAIV:** quadrivalent live attenuated intranasal.

**Adults and the elderly: Netleague analysis of ILI\***

|                          |                         |                   |                            |                   |                   |                   |                   |
|--------------------------|-------------------------|-------------------|----------------------------|-------------------|-------------------|-------------------|-------------------|
| <b>placebo</b>           | <b>0.8 (0.72, 0.89)</b> | 0.8 (0.5, 1.26)   | 0.82 (0.51, 1.32)          | 0.76 (0.54, 1.06) | 0.74 (0.5, 1.11)  | 0.74 (0.4, 1.34)  | 0.93 (0.67, 1.28) |
| <b>1.25 (1.13, 1.39)</b> | <b>3-IIV</b>            | 0.99 (0.64, 1.56) | 1.02 (0.64, 1.62)          | 0.94 (0.68, 1.32) | 0.93 (0.61, 1.41) | 0.92 (0.5, 1.69)  | 1.16 (0.83, 1.63) |
| 1.25 (0.79, 1.99)        | 1.01 (0.64, 1.57)       | <b>3-IIV HD</b>   | 1.03 (0.54, 1.95)          | 0.95 (0.54, 1.66) | 0.93 (0.51, 1.72) | 0.92 (0.43, 1.97) | 1.16 (0.67, 2.04) |
| 1.22 (0.76, 1.97)        | 0.98 (0.62, 1.56)       | 0.97 (0.51, 1.85) | <b>3-IIV MF59/AS03-adj</b> | 0.92 (0.52, 1.64) | 0.91 (0.48, 1.7)  | 0.9 (0.42, 1.94)  | 1.13 (0.64, 2.01) |
| 1.32 (0.95, 1.84)        | 1.06 (0.76, 1.47)       | 1.05 (0.6, 1.84)  | 1.08 (0.61, 1.92)          | <b>3-RIV</b>      | 0.98 (0.58, 1.65) | 0.97 (0.49, 1.93) | 1.23 (0.77, 1.94) |
| 1.34 (0.9, 2.01)         | 1.08 (0.71, 1.63)       | 1.07 (0.58, 1.97) | 1.1 (0.59, 2.06)           | 1.02 (0.6, 1.72)  | <b>4-IIV</b>      | 0.99 (0.64, 1.55) | 1.25 (0.75, 2.09) |
| 1.36 (0.75, 2.47)        | 1.09 (0.59, 2)          | 1.08 (0.51, 2.31) | 1.11 (0.51, 2.4)           | 1.03 (0.52, 2.05) | 1.01 (0.65, 1.57) | <b>4-RIV</b>      | 1.26 (0.64, 2.5)  |
| 1.08 (0.78, 1.49)        | 0.86 (0.61, 1.21)       | 0.86 (0.49, 1.5)  | 0.88 (0.5, 1.56)           | 0.82 (0.51, 1.29) | 0.8 (0.48, 1.34)  | 0.79 (0.4, 1.56)  | <b>3 LAIV</b>     |

The estimate is located at the intersection of the column-defining vaccine and the row-defining vaccine. Data are RRs (95% CrI). Significant results are in bold. In the upper triangle, comparisons of treatments should be read from right to left. An RR below 1 favors the medication on the bottom right vs. the medication on the top left in the diagonal.

\* **Placebo:** placebo/no vaccine; **3-IIV:** trivalent inactivated intramuscular; **3-IIV HD:** trivalent inactivated high dose intramuscular; **3-IIV ID:** trivalent inactivated intradermal; **3-IIV MF59/AS03-adj:** trivalent inactivated adjuvanted with MF59/ASO3 intramuscular; **3-IIV vir/lip-adj:** trivalent inactivated adjuvanted with Virosome/liposome intramuscular; **3-RIV:** trivalent recombinant intramuscular; **4-IIV:** quadrivalent inactivated intramuscular; **4-IIV HD:** quadrivalent inactivated high dose intramuscular; **4-IIV ID:** quadrivalent inactivated intradermal; **4-IIV MF59/AS03-adj:** quadrivalent inactivated adjuvanted with MF59/ASO3 intramuscular; **4-IIV vir/lip-adj:** quadrivalent inactivated adjuvanted with virosome/liposome intramuscular; **4-RIV:** quadrivalent recombinant intramuscular; **3-LAIV:** trivalent live attenuated intranasal; **4-LAIV:** quadrivalent live attenuated intranasal.

### All children: Network geometry of ILI\*

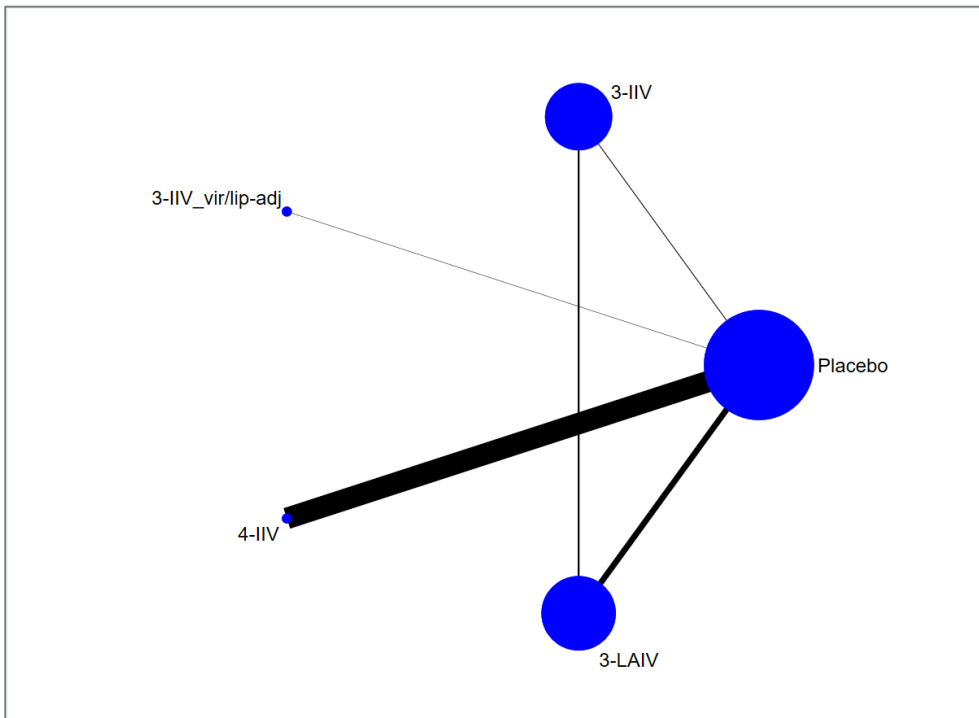

The thickness of the line is proportional to the precision of each direct estimate, and the width of each circle is proportional to the number of studies included in the treatment.

### All children: Forest plots of ILI. Comparison with placebo/no vaccine and with 3-IIV\*

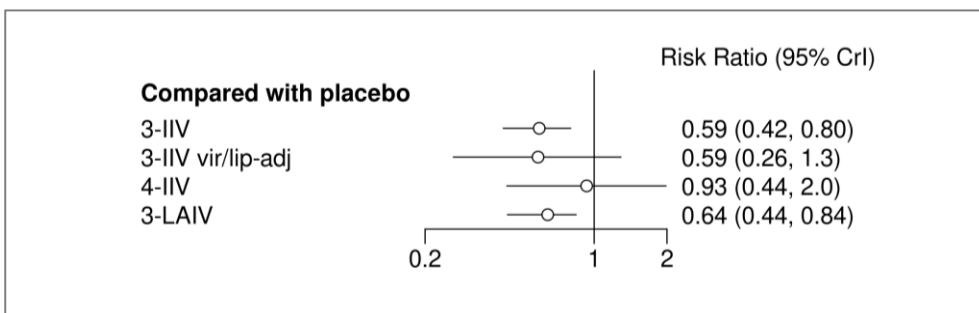

OR <1 favors experimental vaccine compared to placebo or 3-IIV

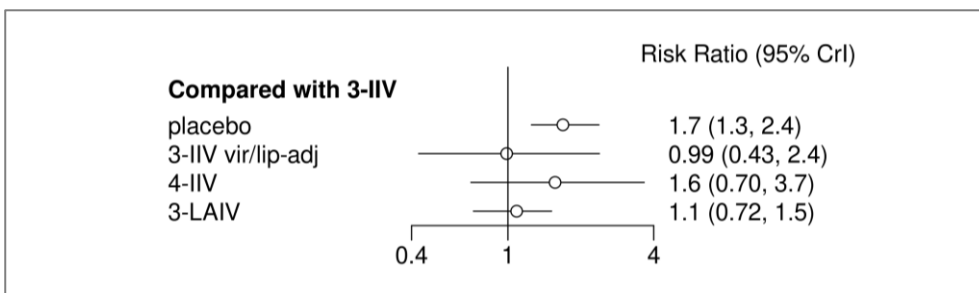

OR <1 favors experimental vaccine compared to placebo or 3-IIV

\* **Placebo:** placebo/no vaccine; **3-IIV:** trivalent inactivated intramuscular; **3-IIV HD:** trivalent inactivated high dose intramuscular; **3-IIV ID:** trivalent inactivated intradermal; **3-IIV MF59/AS03-adj:** trivalent inactivated adjuvanted with MF59/AS03 intramuscular; **3-IIV vir/lip-adj:** trivalent inactivated adjuvanted with Virosome/liposome intramuscular; **3-RIV:** trivalent recombinant intramuscular; **4-IIV:** quadrivalent inactivated intramuscular; **4-IIV HD:** quadrivalent inactivated high dose intramuscular; **4-IIV ID:** quadrivalent inactivated intradermal; **4-IIV MF59/AS03-adj:** quadrivalent inactivated adjuvanted with MF59/AS03 intramuscular; **4-IIV vir/lip-adj:** quadrivalent inactivated adjuvanted with virosome/liposome intramuscular; **4-RIV:** quadrivalent recombinant intramuscular; **3-LAIV:** trivalent live attenuated intranasal; **4-LAIV:** quadrivalent live attenuated intranasal.

All children: Netleague analysis of ILI\*

|                          |                         |                          |                   |                          |
|--------------------------|-------------------------|--------------------------|-------------------|--------------------------|
| <b>placebo</b>           | <b>0.59 (0.42, 0.8)</b> | 0.59 (0.26, 1.29)        | 0.93 (0.44, 1.98) | <b>0.64 (0.44, 0.84)</b> |
| <b>1.69 (1.25, 2.38)</b> | <b>3-IIV</b>            | 0.99 (0.43, 2.39)        | 1.57 (0.7, 3.66)  | 1.09 (0.72, 1.51)        |
| 1.71 (0.78, 3.82)        | 1.01 (0.42, 2.34)       | <b>3-IIV vir/lip-adj</b> | 1.59 (0.53, 4.79) | 1.1 (0.44, 2.45)         |
| 1.07 (0.5, 2.3)          | 0.64 (0.27, 1.42)       | 0.63 (0.21, 1.88)        | <b>4-IIV</b>      | 0.69 (0.29, 1.47)        |
| <b>1.56 (1.19, 2.28)</b> | 0.92 (0.66, 1.39)       | 0.91 (0.41, 2.28)        | 1.44 (0.68, 3.5)  | <b>3 LAIV</b>            |

The estimate is located at the intersection of the column-defining vaccine and the row-defining vaccine. Data are RRs (95% CrI). Significant results are in bold. In the upper triangle, comparisons of treatments should be read from right to left. An RR below 1 favors the medication on the bottom right vs. the medication on the top left in the diagonal.

\* **Placebo**: placebo/no vaccine; **3-IIV**: trivalent inactivated intramuscular; **3-IIV HD**: trivalent inactivated high dose intramuscular; **3-IIV ID**: trivalent inactivated intradermal; **3-IIV MF59/AS03-adj**: trivalent inactivated adjuvanted with MF59/AS03 intramuscular; **3-IIV vir/lip-adj**: trivalent inactivated adjuvanted with Virosome/liposome intramuscular; **3-RIV**: trivalent recombinant intramuscular; **4-IIV**: quadrivalent inactivated intramuscular; **4-IIV HD**: quadrivalent inactivated high dose intramuscular; **4-IIV ID**: quadrivalent inactivated intradermal; **4-IIV MF59/AS03-adj**: quadrivalent inactivated adjuvanted with MF59/AS03 intramuscular; **4-IIV vir/lip-adj**: quadrivalent inactivated adjuvanted with virosome/liposome intramuscular; **4-RIV**: quadrivalent recombinant intramuscular; **3-LAIV**: trivalent live attenuated intranasal; **4-LAIV**: quadrivalent live attenuated intranasal.

**All children: Network geometry of acute otitis media\***

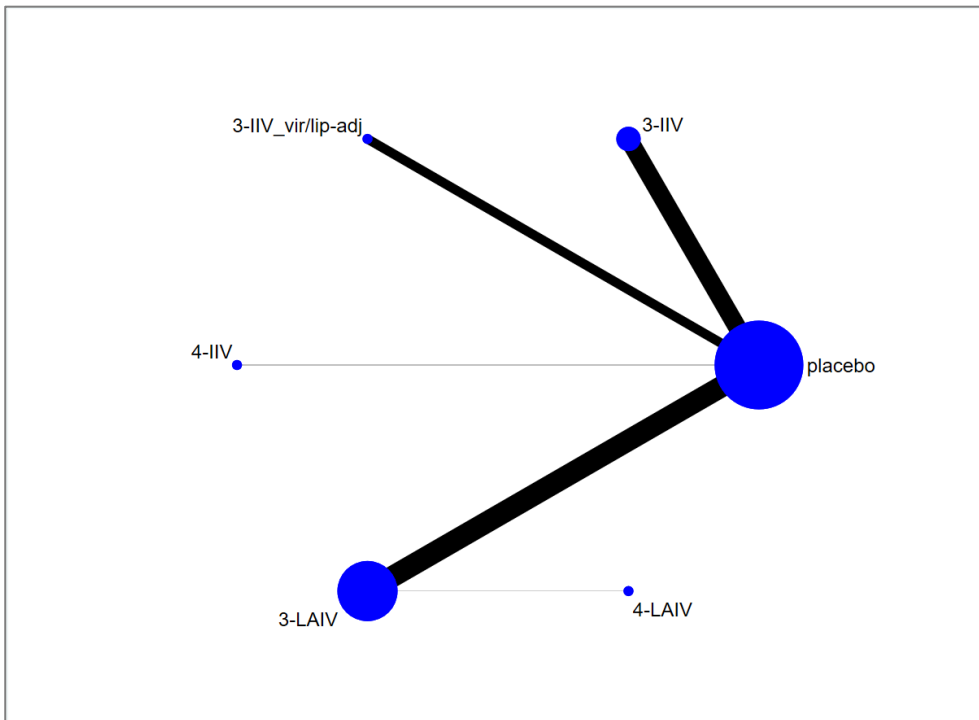

The thickness of the line is proportional to the precision of each direct estimate, and the width of each circle is proportional to the number of studies included in the treatment.

**All children: Forest plot of acute otitis media, comparison with placebo/no vaccine and with 3-IIV\***

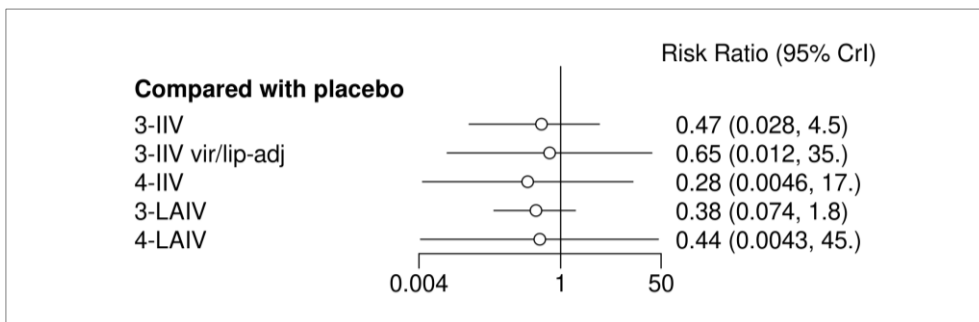

OR <1 favors experimental vaccine compared to placebo or 3-IIV

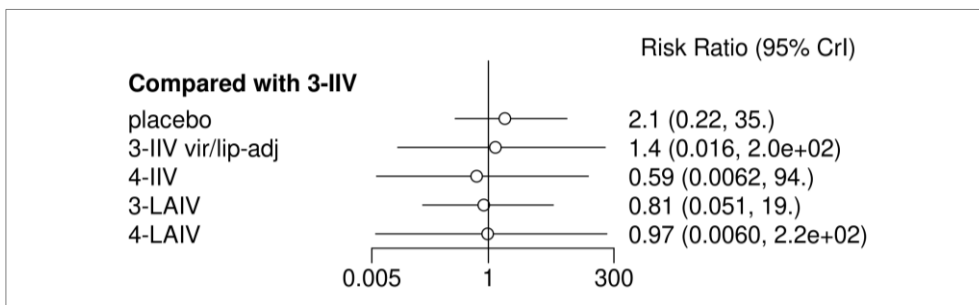

OR <1 favors experimental vaccine compared to placebo or 3-IIV

\* **Placebo:** placebo/no vaccine; **3-IIV:** trivalent inactivated intramuscular; **3-IIV HD:** trivalent inactivated high dose intramuscular; **3-IIV ID:** trivalent inactivated intradermal; **3-IIV MF59/AS03-adj:** trivalent inactivated adjuvanted with MF59/ASO3 intramuscular; **3-IIV vir/lip-adj:** trivalent inactivated adjuvanted with Virosome/liposome intramuscular; **3-RIV:** trivalent recombinant intramuscular; **4-IIV:** quadrivalent inactivated intramuscular; **4-IIV HD:** quadrivalent inactivated high dose intramuscular; **4-IIV ID:** quadrivalent inactivated intradermal; **4-IIV MF59/AS03-adj:** quadrivalent inactivated adjuvanted with MF59/ASO3 intramuscular; **4-IIV vir/lip-adj:** quadrivalent inactivated adjuvanted with virosome/liposome intramuscular; **4-RIV:** quadrivalent recombinant intramuscular; **3-LAIV:** trivalent live attenuated intranasal; **4-LAIV:** quadrivalent live attenuated intranasal.

**All children: Netleague analysis of acute otitis media\***

|                     |                     |                          |                    |                     |                     |
|---------------------|---------------------|--------------------------|--------------------|---------------------|---------------------|
| <b>placebo</b>      | 0.47 (0.03, 4.51)   | 0.65 (0.01, 34.87)       | 0.28 (0, 16.7)     | 0.38 (0.07, 1.77)   | 0.44 (0, 44.83)     |
| 2.11 (0.22, 35.3)   | <b>3-IIV</b>        | 1.37 (0.02, 201.44)      | 0.59 (0.01, 93.54) | 0.81 (0.05, 19.04)  | 0.97 (0.01, 216.91) |
| 1.54 (0.03, 83.13)  | 0.73 (0, 61.45)     | <b>3-IIV vir/lip-adj</b> | 0.43 (0, 130.05)   | 0.59 (0.01, 40.8)   | 0.69 (0, 288.72)    |
| 3.62 (0.06, 217.29) | 1.71 (0.01, 161.07) | 2.34 (0.01, 745.27)      | <b>4-IIV</b>       | 1.38 (0.02, 105.68) | 1.63 (0, 746.01)    |
| 2.62 (0.56, 13.44)  | 1.24 (0.05, 19.75)  | 1.7 (0.02, 131.34)       | 0.72 (0.01, 61.6)  | <b>3 LAIV</b>       | 1.16 (0.02, 93.17)  |
| 2.26 (0.02, 234.81) | 1.04 (0, 167.64)    | 1.46 (0, 698.03)         | 0.61 (0, 314.4)    | 0.86 (0.01, 63.6)   | <b>4 LAIV</b>       |

The estimate is located at the intersection of the column-defining vaccine and the row-defining vaccine. Data are RRs (95% CrI). Significant results are in bold. In the upper triangle, comparisons of treatments should be read from right to left. An RR below 1 favors the medication on the bottom right vs. the medication on the top left in the diagonal.

\* **Placebo:** placebo/no vaccine; **3-IIV:** trivalent inactivated intramuscular; **3-IIV HD:** trivalent inactivated high dose intramuscular; **3-IIV ID:** trivalent inactivated intradermal; **3-IIV MF59/AS03-adj:** trivalent inactivated adjuvanted with MF59/AS03 intramuscular; **3-IIV vir/lip-adj:** trivalent inactivated adjuvanted with Virosome/liposome intramuscular; **3-RIV:** trivalent recombinant intramuscular; **4-IIV:** quadrivalent inactivated intramuscular; **4-IIV HD:** quadrivalent inactivated high dose intramuscular; **4-IIV ID:** quadrivalent inactivated intradermal; **4-IIV MF59/AS03-adj:** quadrivalent inactivated adjuvanted with MF59/AS03 intramuscular; **4-IIV vir/lip-adj:** quadrivalent inactivated adjuvanted with virosome/liposome intramuscular; **4-RIV:** quadrivalent recombinant intramuscular; **3-LAIV:** trivalent live attenuated intranasal; **4-LAIV:** quadrivalent live attenuated intranasal.

## Pregnancy outcomes: 3-IIV vs placebo/no vaccine, pairwise meta-analyses\*

### Abortion

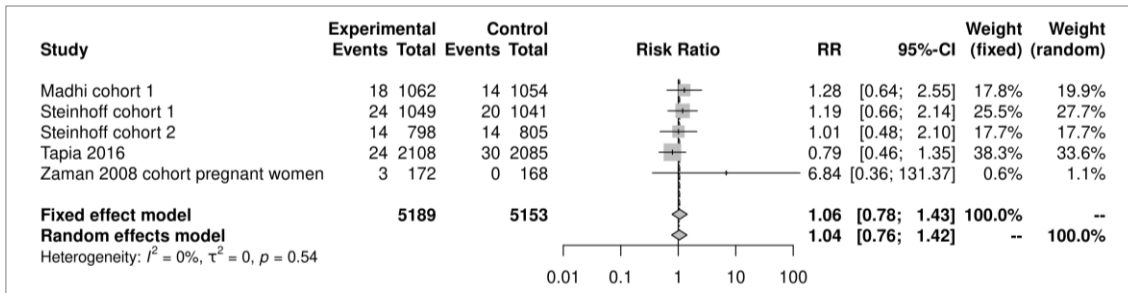

### Preterm birth

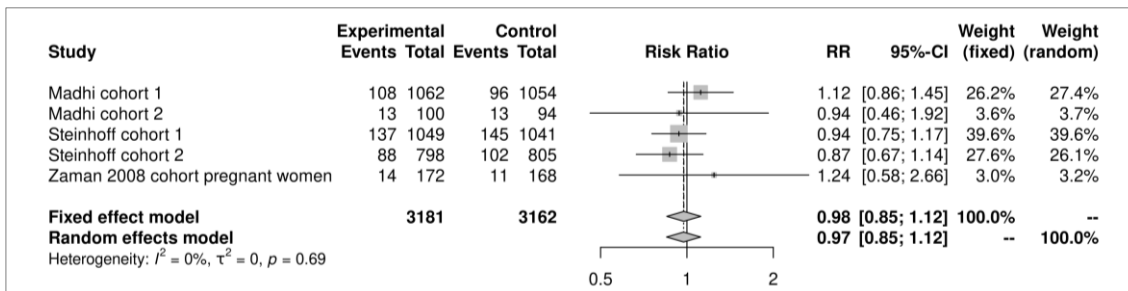

### Congenital malformation

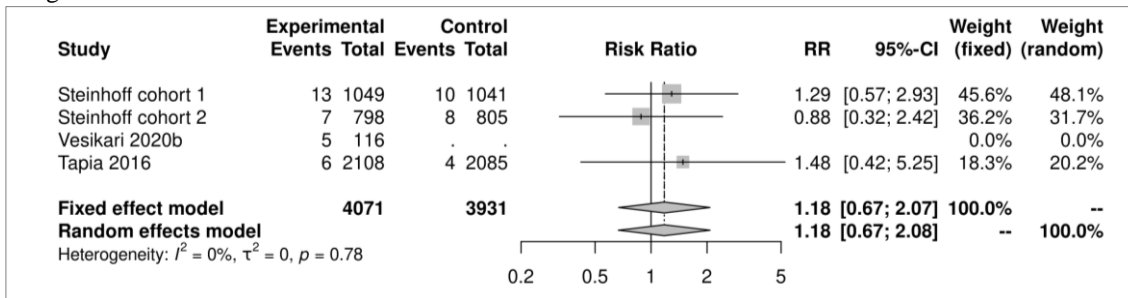

### Neonatal death

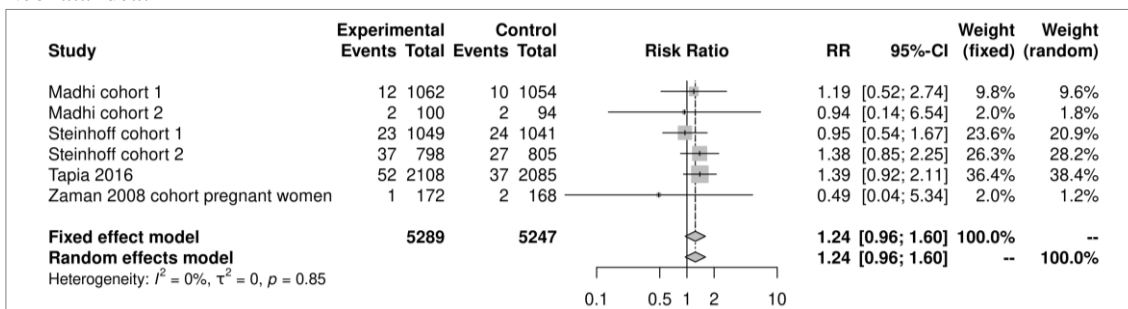

### Low birth weight

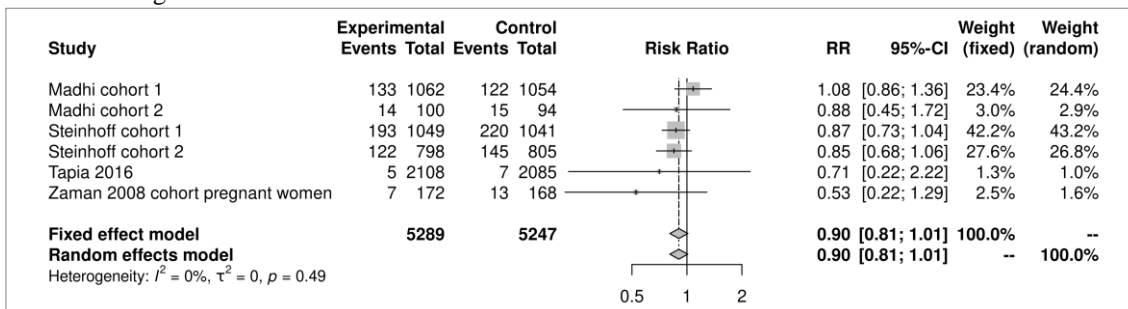

\* RR < 1 favors 3-IIV compared to placebo or no vaccine



**Adults and the elderly: Network geometry of any systemic adverse event\***

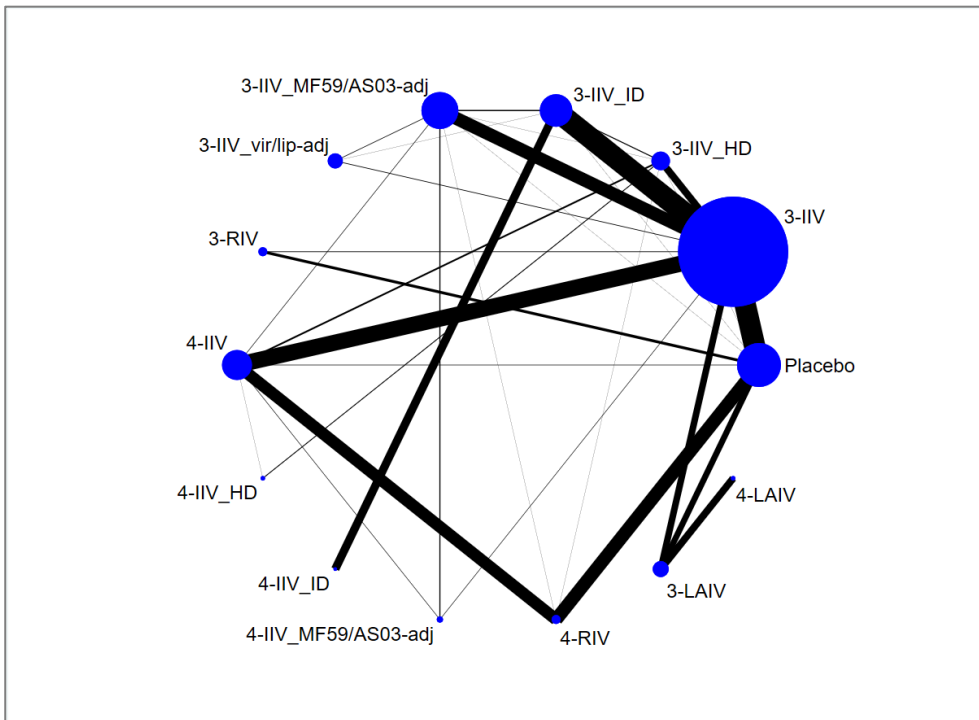

The thickness of the line is proportional to the precision of each direct estimate, and the width of each circle is proportional to the number of studies included in the treatment.

\* **Placebo:** placebo/no vaccine; **3-IIV:** trivalent inactivated intramuscular; **3-IIV HD:** trivalent inactivated high dose intramuscular; **3-IIV ID:** trivalent inactivated intradermal; **3-IIV MF59/AS03-adj:** trivalent inactivated adjuvanted with MF59/ASO3 intramuscular; **3-IIV vir/lip-adj:** trivalent inactivated adjuvanted with Virosome/liposome intramuscular; **3-RIV:** trivalent recombinant intramuscular; **4-IIV:** quadrivalent inactivated intramuscular; **4-IIV HD:** quadrivalent inactivated high dose intramuscular; **4-IIV ID:** quadrivalent inactivated intradermal; **4-IIV MF59/AS03-adj:** quadrivalent inactivated adjuvanted with MF59/ASO3 intramuscular; **4-IIV vir/lip-adj:** quadrivalent inactivated adjuvanted with virosome/liposome intramuscular; **4-RIV:** quadrivalent recombinant intramuscular; **3-LAIV:** trivalent live attenuated intranasal; **4-LAIV:** quadrivalent live attenuated intranasal.

**Adults and the elderly: Forest plots of any systemic adverse event, comparison with placebo/no vaccine and with 3-IIV\***

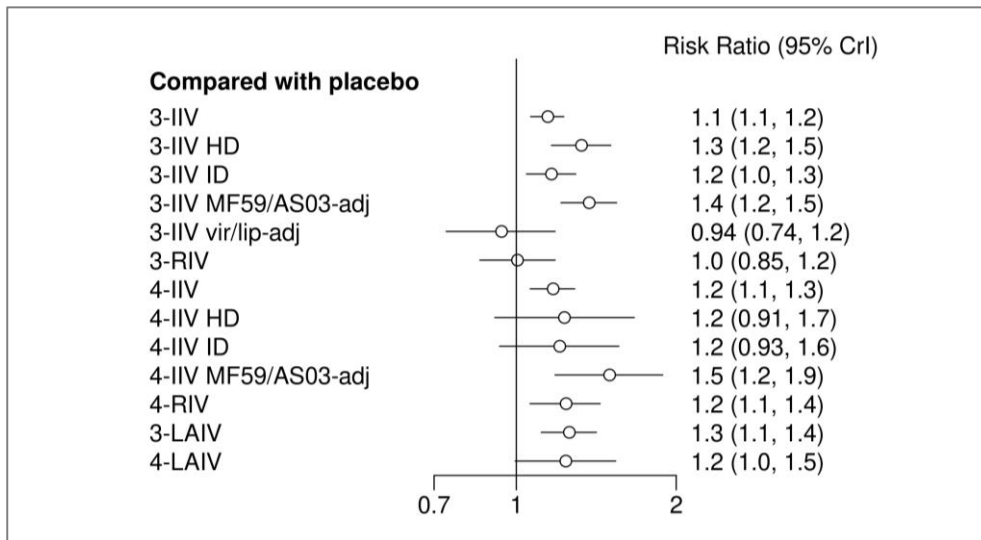

OR <1 favors experimental vaccine compared to placebo or 3-IIV

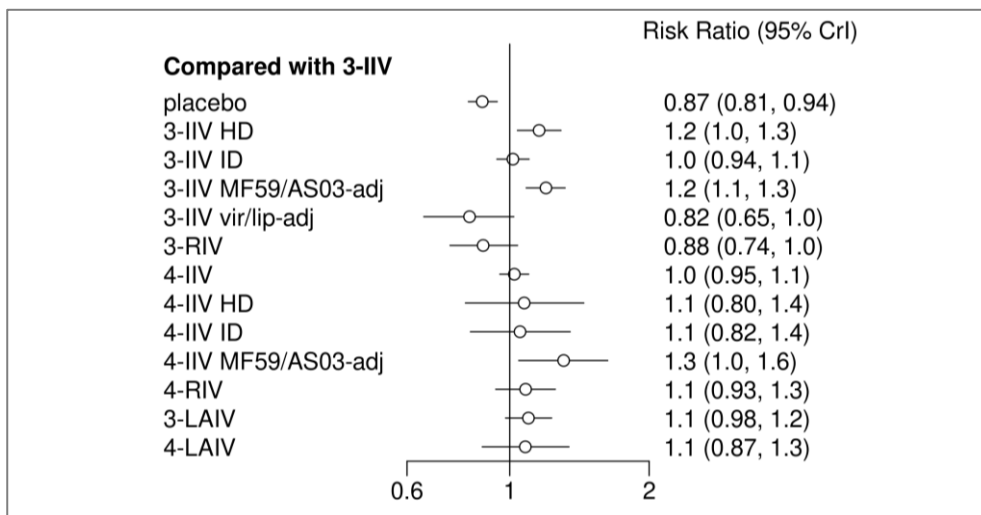

OR <1 favors experimental vaccine compared to placebo or 3-IIV

\* **Placebo:** placebo/no vaccine; **3-IIV:** trivalent inactivated intramuscular; **3-IIV HD:** trivalent inactivated high dose intramuscular; **3-IIV ID:** trivalent inactivated intradermal; **3-IIV MF59/AS03-adj:** trivalent inactivated adjuvanted with MF59/ASO3 intramuscular; **3-IIV vir/lip-adj:** trivalent inactivated adjuvanted with Virosome/liposome intramuscular; **3-RIV:** trivalent recombinant intramuscular; **4-IIV:** quadrivalent inactivated intramuscular; **4-IIV HD:** quadrivalent inactivated high dose intramuscular; **4-IIV ID:** quadrivalent inactivated intradermal; **4-IIV MF59/AS03-adj:** quadrivalent inactivated adjuvanted with MF59/ASO3 intramuscular; **4-IIV vir/lip-adj:** quadrivalent inactivated adjuvanted with virosome/liposome intramuscular; **4-RIV:** quadrivalent recombinant intramuscular; **3-LAIV:** trivalent live attenuated intranasal; **4-LAIV:** quadrivalent live attenuated intranasal.

Adults and the elderly: Netleague analysis of any systemic adverse event\*

|                          |                          |                          |                          |                            |                          |                          |                          |                   |                   |                            |                          |                          |                   |
|--------------------------|--------------------------|--------------------------|--------------------------|----------------------------|--------------------------|--------------------------|--------------------------|-------------------|-------------------|----------------------------|--------------------------|--------------------------|-------------------|
| placebo                  | <b>1.15 (1.06, 1.23)</b> | <b>1.33 (1.16, 1.51)</b> | <b>1.16 (1.05, 1.29)</b> | <b>1.37 (1.21, 1.54)</b>   | 0.94 (0.74, 1.18)        | 1 (0.85, 1.18)           | <b>1.17 (1.06, 1.29)</b> | 1.23 (0.91, 1.67) | 1.21 (0.93, 1.56) | <b>1.5 (1.18, 1.89)</b>    | <b>1.24 (1.06, 1.44)</b> | <b>1.26 (1.11, 1.42)</b> | 1.24 (1, 1.54)    |
| <b>0.87 (0.81, 0.94)</b> | <b>3-IIV</b>             | <b>1.16 (1.04, 1.29)</b> | 1.02 (0.94, 1.1)         | <b>1.2 (1.09, 1.32)</b>    | 0.82 (0.65, 1.02)        | 0.88 (0.74, 1.04)        | 1.02 (0.95, 1.1)         | 1.07 (0.8, 1.45)  | 1.05 (0.82, 1.35) | <b>1.31 (1.05, 1.63)</b>   | 1.08 (0.93, 1.25)        | 1.1 (0.98, 1.23)         | 1.08 (0.87, 1.34) |
| <b>0.75 (0.66, 0.86)</b> | <b>0.86 (0.78, 0.96)</b> | <b>3-IIV HD</b>          | 0.88 (0.77, 1)           | 1.03 (0.89, 1.19)          | <b>0.71 (0.55, 0.9)</b>  | <b>0.76 (0.62, 0.93)</b> | 0.88 (0.78, 1)           | 0.93 (0.7, 1.23)  | 0.91 (0.7, 1.19)  | 1.13 (0.88, 1.44)          | 0.93 (0.78, 1.12)        | 0.95 (0.81, 1.11)        | 0.93 (0.74, 1.19) |
| <b>0.86 (0.77, 0.96)</b> | 0.98 (0.91, 1.07)        | 1.14 (1, 1.3)            | <b>3-IIV ID</b>          | <b>1.18 (1.04, 1.32)</b>   | 0.81 (0.64, 1.01)        | 0.86 (0.72, 1.04)        | 1.01 (0.9, 1.12)         | 1.06 (0.78, 1.43) | 1.04 (0.82, 1.31) | <b>1.29 (1.02, 1.62)</b>   | 1.06 (0.9, 1.26)         | 1.08 (0.94, 1.24)        | 1.06 (0.85, 1.34) |
| <b>0.73 (0.65, 0.82)</b> | <b>0.84 (0.76, 0.92)</b> | 0.97 (0.84, 1.12)        | <b>0.85 (0.75, 0.96)</b> | <b>3-IIV MF59/AS03-adj</b> | <b>0.68 (0.54, 0.86)</b> | <b>0.73 (0.61, 0.89)</b> | <b>0.85 (0.76, 0.96)</b> | 0.9 (0.66, 1.22)  | 0.88 (0.68, 1.15) | 1.09 (0.88, 1.35)          | 0.9 (0.76, 1.08)         | 0.92 (0.79, 1.07)        | 0.9 (0.72, 1.15)  |
| 1.07 (0.85, 1.36)        | 1.22 (0.98, 1.53)        | <b>1.41 (1.11, 1.81)</b> | 1.24 (0.99, 1.57)        | <b>1.46 (1.17, 1.84)</b>   | <b>3-IIV vir/lip-adj</b> | 1.07 (0.81, 1.43)        | 1.25 (0.99, 1.58)        | 1.31 (0.91, 1.91) | 1.29 (0.93, 1.79) | <b>1.6 (1.17, 2.17)</b>    | <b>1.32 (1.01, 1.73)</b> | <b>1.34 (1.04, 1.73)</b> | 1.32 (0.97, 1.8)  |
| 1 (0.85, 1.17)           | 1.14 (0.96, 1.35)        | <b>1.32 (1.08, 1.61)</b> | 1.16 (0.96, 1.39)        | <b>1.37 (1.12, 1.65)</b>   | 0.93 (0.7, 1.23)         | <b>3-RIV</b>             | 1.17 (0.97, 1.39)        | 1.23 (0.87, 1.72) | 1.2 (0.89, 1.62)  | <b>1.49 (1.12, 1.97)</b>   | 1.24 (0.99, 1.53)        | <b>1.25 (1.03, 1.52)</b> | 1.23 (0.94, 1.61) |
| <b>0.85 (0.78, 0.94)</b> | 0.98 (0.91, 1.05)        | 1.13 (1, 1.28)           | 0.99 (0.89, 1.11)        | <b>1.17 (1.04, 1.32)</b>   | 0.8 (0.63, 1.01)         | 0.86 (0.72, 1.03)        | <b>4-IIV</b>             | 1.05 (0.78, 1.42) | 1.03 (0.8, 1.33)  | <b>1.28 (1.02, 1.6)</b>    | 1.06 (0.92, 1.22)        | 1.07 (0.94, 1.23)        | 1.06 (0.85, 1.33) |
| 0.81 (0.6, 1.1)          | 0.93 (0.69, 1.25)        | 1.08 (0.81, 1.42)        | 0.95 (0.7, 1.28)         | 1.11 (0.82, 1.52)          | 0.76 (0.52, 1.1)         | 0.82 (0.58, 1.15)        | 0.95 (0.71, 1.28)        | <b>4-IIV-HD</b>   | 0.98 (0.67, 1.44) | 1.22 (0.84, 1.75)          | 1.01 (0.73, 1.39)        | 1.02 (0.74, 1.4)         | 1.01 (0.7, 1.45)  |
| 0.83 (0.64, 1.08)        | 0.95 (0.74, 1.22)        | 1.1 (0.84, 1.43)         | 0.97 (0.76, 1.22)        | 1.14 (0.87, 1.48)          | 0.78 (0.56, 1.08)        | 0.83 (0.62, 1.13)        | 0.97 (0.75, 1.25)        | 1.02 (0.69, 1.5)  | <b>4-IIV-ID</b>   | 1.24 (0.89, 1.73)          | 1.03 (0.77, 1.37)        | 1.04 (0.79, 1.37)        | 1.03 (0.74, 1.43) |
| <b>0.67 (0.53, 0.85)</b> | <b>0.76 (0.61, 0.96)</b> | 0.89 (0.69, 1.13)        | <b>0.78 (0.62, 0.98)</b> | 0.92 (0.74, 1.14)          | <b>0.63 (0.46, 0.85)</b> | <b>0.67 (0.51, 0.89)</b> | <b>0.78 (0.62, 0.98)</b> | 0.82 (0.57, 1.19) | 0.81 (0.58, 1.12) | <b>4-IIV MF59/AS03-adj</b> | 0.83 (0.64, 1.08)        | 0.84 (0.66, 1.08)        | 0.83 (0.61, 1.13) |
| <b>0.81 (0.7, 0.94)</b>  | 0.92 (0.8, 1.07)         | 1.07 (0.89, 1.28)        | 0.94 (0.79, 1.11)        | 1.11 (0.93, 1.32)          | <b>0.76 (0.58, 0.99)</b> | 0.81 (0.65, 1.01)        | 0.95 (0.82, 1.09)        | 0.99 (0.72, 1.38) | 0.97 (0.73, 1.3)  | 1.21 (0.93, 1.57)          | <b>4-RIV</b>             | 1.01 (0.85, 1.22)        | 1 (0.77, 1.3)     |
| <b>0.79 (0.71, 0.9)</b>  | 0.91 (0.81, 1.02)        | 1.05 (0.9, 1.23)         | 0.93 (0.8, 1.06)         | 1.09 (0.94, 1.26)          | <b>0.75 (0.58, 0.96)</b> | <b>0.8 (0.66, 0.97)</b>  | 0.93 (0.81, 1.06)        | 0.98 (0.72, 1.34) | 0.96 (0.73, 1.26) | 1.19 (0.93, 1.53)          | 0.99 (0.82, 1.18)        | <b>3-LAIV</b>            | 0.98 (0.82, 1.18) |
| 0.81 (0.65, 1)           | 0.93 (0.75, 1.15)        | 1.07 (0.84, 1.36)        | 0.94 (0.75, 1.18)        | 1.11 (0.87, 1.4)           | 0.76 (0.55, 1.03)        | 0.81 (0.62, 1.06)        | 0.95 (0.75, 1.18)        | 0.99 (0.69, 1.43) | 0.97 (0.7, 1.35)  | 1.21 (0.89, 1.64)          | 1 (0.77, 1.29)           | 1.02 (0.85, 1.22)        | <b>4-LAIV</b>     |

The estimate is located at the intersection of the column-defining vaccine and the row-defining vaccine. Data are RRs (95% CrI). Significant results are in bold. In the upper triangle, comparisons of treatments should be read from right to left. An RR below 1 favors the medication on the bottom right vs. the medication on the top left in the diagonal.

\* **Placebo**: placebo/no vaccine; **3-IIV**: trivalent inactivated intramuscular; **3-IIV HD**: trivalent inactivated high dose intramuscular; **3-IIV ID**: trivalent inactivated intradermal; **3-IIV MF59/AS03-adj**: trivalent inactivated adjuvanted with MF59/AS03 intramuscular; **3-IIV vir/lip-adj**: trivalent inactivated adjuvanted with Virosome/liposome intramuscular; **3-RIV**: trivalent recombinant intramuscular; **4-IIV**: quadrivalent inactivated intramuscular; **4-IIV HD**: quadrivalent inactivated high dose intramuscular; **4-IIV ID**: quadrivalent inactivated intradermal; **4-IIV MF59/AS03-adj**: quadrivalent inactivated adjuvanted with MF59/AS03 intramuscular; **4-IIV vir/lip-adj**: quadrivalent inactivated adjuvanted with virosome/liposome intramuscular; **4-RIV**: quadrivalent recombinant intramuscular; **3-LAIV**: trivalent live attenuated intranasal; **4-LAIV**: quadrivalent live attenuated intranasal.

**The elderly,  $\geq 61$  years: Network geometry of any systemic adverse event \***

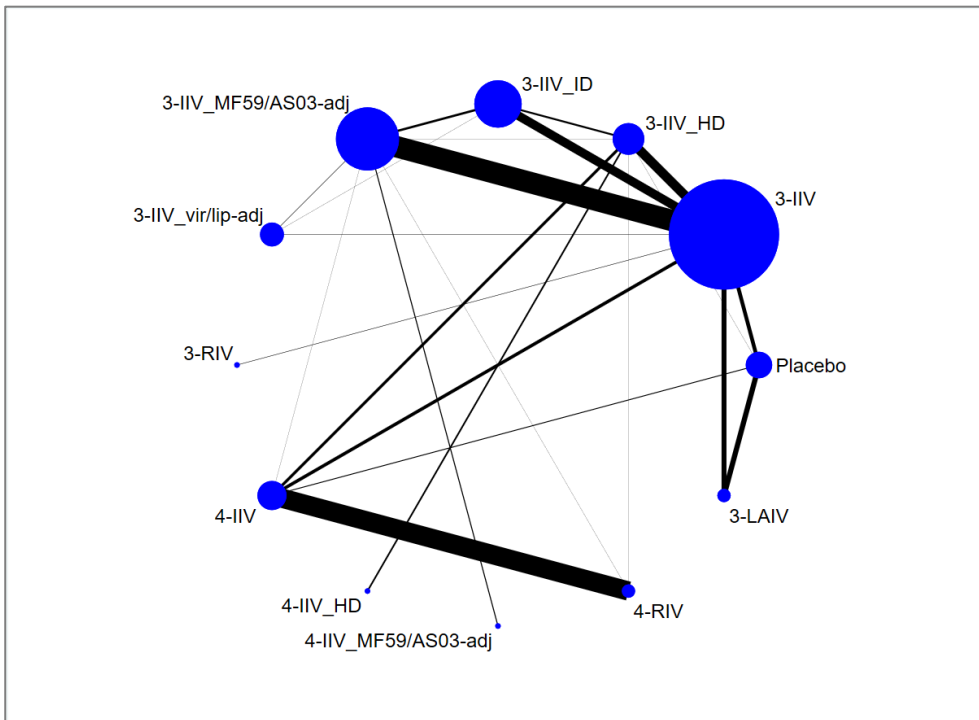

The thickness of the line is proportional to the precision of each direct estimate, and the width of each circle is proportional to the number of studies included in the treatment.

\* **Placebo:** placebo/no vaccine; **3-IIV:** trivalent inactivated intramuscular; **3-IIV HD:** trivalent inactivated high dose intramuscular; **3-IIV ID:** trivalent inactivated intradermal; **3-IIV MF59/AS03-adj:** trivalent inactivated adjuvanted with MF59/ASO3 intramuscular; **3-IIV vir/lip-adj:** trivalent inactivated adjuvanted with Virosome/liposome intramuscular; **3-RIV:** trivalent recombinant intramuscular; **4-IIV:** quadrivalent inactivated intramuscular; **4-IIV HD:** quadrivalent inactivated high dose intramuscular; **4-IIV ID:** quadrivalent inactivated intradermal; **4-IIV MF59/AS03-adj:** quadrivalent inactivated adjuvanted with MF59/ASO3 intramuscular; **4-IIV vir/lip-adj:** quadrivalent inactivated adjuvanted with virosome/liposome intramuscular; **4-RIV:** quadrivalent recombinant intramuscular; **3-LAIV:** trivalent live attenuated intranasal; **4-LAIV:** quadrivalent live attenuated intranasal.

**The elderly,  $\geq 61$  years: Forest plot of any systemic adverse event, comparison with placebo/no vaccine and with 3-IIV\***

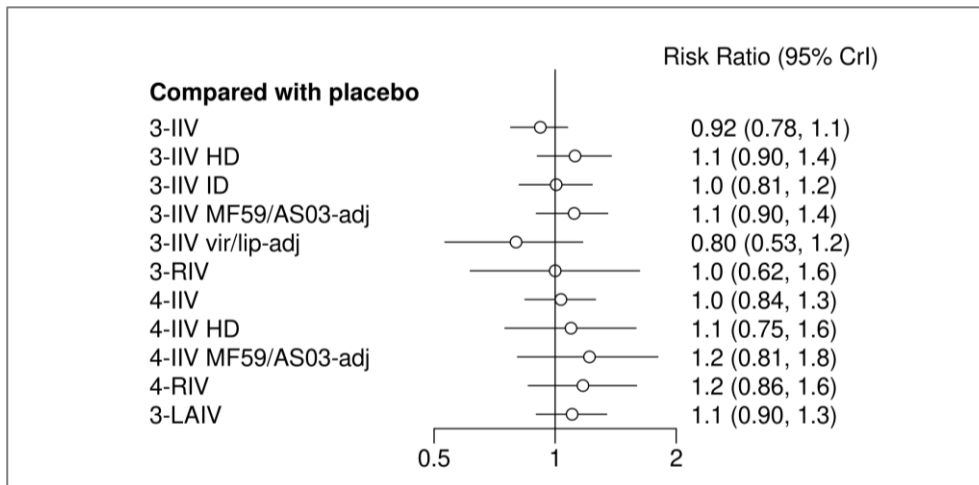

OR <1 favors experimental vaccine compared to placebo or 3-IIV

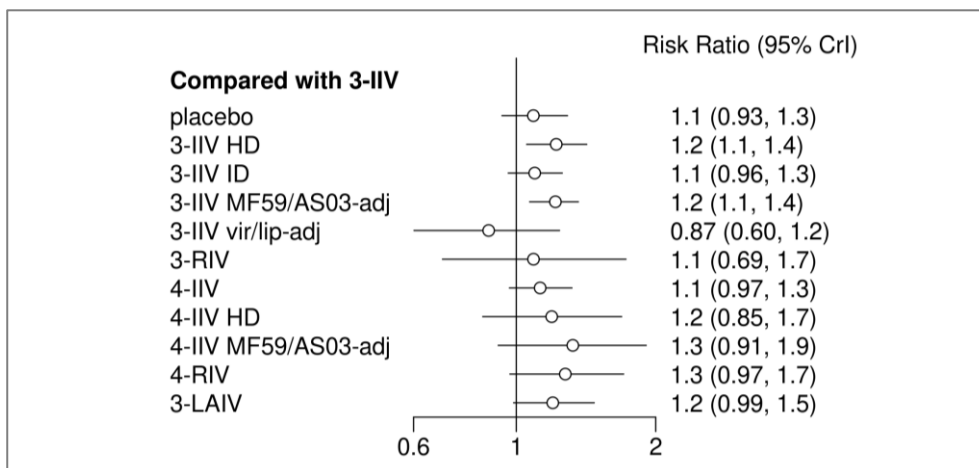

OR <1 favors experimental vaccine compared to placebo or 3-IIV

\* **Placebo:** placebo/no vaccine; **3-IIV:** trivalent inactivated intramuscular; **3-IIV HD:** trivalent inactivated high dose intramuscular; **3-IIV ID:** trivalent inactivated intradermal; **3-IIV MF59/AS03-adj:** trivalent inactivated adjuvanted with MF59/ASO3 intramuscular; **3-IIV vir/lip-adj:** trivalent inactivated adjuvanted with Virosome/liposome intramuscular; **3-RIV:** trivalent recombinant intramuscular; **4-IIV:** quadrivalent inactivated intramuscular; **4-IIV HD:** quadrivalent inactivated high dose intramuscular; **4-IIV ID:** quadrivalent inactivated intradermal; **4-IIV MF59/AS03-adj:** quadrivalent inactivated adjuvanted with MF59/ASO3 intramuscular; **4-IIV vir/lip-adj:** quadrivalent inactivated adjuvanted with virosome/liposome intramuscular; **4-RIV:** quadrivalent recombinant intramuscular; **3-LAIV:** trivalent live attenuated intranasal; **4-LAIV:** quadrivalent live attenuated intranasal.

**The elderly, ≥61 years: Netleague analysis of any systemic adverse event\***

|                   |                          |                          |                   |                            |                          |                   |                   |                   |                            |                   |                   |
|-------------------|--------------------------|--------------------------|-------------------|----------------------------|--------------------------|-------------------|-------------------|-------------------|----------------------------|-------------------|-------------------|
| <b>placebo</b>    | 0.92 (0.78, 1.07)        | 1.12 (0.9, 1.38)         | 1.01 (0.81, 1.24) | 1.12 (0.9, 1.35)           | 0.8 (0.53, 1.17)         | 1 (0.62, 1.62)    | 1.03 (0.84, 1.26) | 1.1 (0.75, 1.59)  | 1.22 (0.81, 1.8)           | 1.17 (0.86, 1.59) | 1.1 (0.9, 1.34)   |
| 1.09 (0.93, 1.29) | <b>3-IIV</b>             | <b>1.22 (1.05, 1.42)</b> | 1.1 (0.96, 1.26)  | <b>1.21 (1.07, 1.36)</b>   | 0.87 (0.6, 1.24)         | 1.09 (0.69, 1.73) | 1.13 (0.97, 1.32) | 1.19 (0.85, 1.69) | 1.32 (0.91, 1.91)          | 1.28 (0.97, 1.71) | 1.2 (0.99, 1.47)  |
| 0.89 (0.73, 1.11) | <b>0.82 (0.7, 0.95)</b>  | <b>3-IIV HD</b>          | 0.9 (0.75, 1.08)  | 1 (0.82, 1.19)             | 0.71 (0.48, 1.04)        | 0.89 (0.55, 1.45) | 0.92 (0.77, 1.11) | 0.98 (0.72, 1.33) | 1.09 (0.73, 1.6)           | 1.05 (0.78, 1.42) | 0.98 (0.77, 1.26) |
| 0.99 (0.81, 1.23) | 0.91 (0.8, 1.04)         | 1.11 (0.92, 1.34)        | <b>3-IIV ID</b>   | 1.11 (0.93, 1.29)          | 0.8 (0.54, 1.14)         | 0.99 (0.62, 1.6)  | 1.03 (0.84, 1.25) | 1.09 (0.76, 1.56) | 1.21 (0.82, 1.76)          | 1.17 (0.86, 1.59) | 1.09 (0.86, 1.4)  |
| 0.9 (0.74, 1.11)  | <b>0.82 (0.73, 0.94)</b> | 1 (0.84, 1.23)           | 0.9 (0.77, 1.07)  | <b>3-IIV MF59/AS03-adj</b> | 0.72 (0.5, 1.03)         | 0.9 (0.56, 1.45)  | 0.93 (0.77, 1.14) | 0.98 (0.69, 1.43) | 1.09 (0.77, 1.55)          | 1.05 (0.79, 1.45) | 0.99 (0.79, 1.27) |
| 1.25 (0.85, 1.88) | 1.15 (0.81, 1.66)        | 1.4 (0.96, 2.09)         | 1.26 (0.88, 1.84) | 1.39 (0.98, 2.01)          | <b>3-IIV vir/lip-adj</b> | 1.26 (0.7, 2.26)  | 1.29 (0.88, 1.93) | 1.37 (0.84, 2.26) | 1.53 (0.92, 2.53)          | 1.47 (0.94, 2.33) | 1.38 (0.92, 2.1)  |
| 1 (0.62, 1.63)    | 0.92 (0.58, 1.44)        | 1.12 (0.69, 1.8)         | 1.01 (0.62, 1.61) | 1.11 (0.69, 1.77)          | 0.8 (0.44, 1.42)         | <b>3-RIV</b>      | 1.03 (0.64, 1.67) | 1.09 (0.62, 1.92) | 1.22 (0.67, 2.16)          | 1.17 (0.68, 2.01) | 1.1 (0.67, 1.81)  |
| 0.97 (0.79, 1.19) | 0.89 (0.76, 1.04)        | 1.08 (0.9, 1.3)          | 0.97 (0.8, 1.19)  | 1.08 (0.88, 1.3)           | 0.77 (0.52, 1.13)        | 0.97 (0.6, 1.57)  | <b>4-IIV</b>      | 1.06 (0.74, 1.52) | 1.18 (0.79, 1.74)          | 1.13 (0.9, 1.45)  | 1.07 (0.84, 1.36) |
| 0.91 (0.63, 1.33) | 0.84 (0.59, 1.18)        | 1.02 (0.75, 1.39)        | 0.92 (0.64, 1.32) | 1.02 (0.7, 1.45)           | 0.73 (0.44, 1.19)        | 0.91 (0.52, 1.62) | 0.94 (0.66, 1.35) | <b>4-IIV-HD</b>   | 1.11 (0.67, 1.82)          | 1.07 (0.7, 1.65)  | 1.01 (0.68, 1.5)  |
| 0.82 (0.56, 1.24) | 0.76 (0.52, 1.09)        | 0.92 (0.62, 1.38)        | 0.83 (0.57, 1.22) | 0.92 (0.65, 1.29)          | 0.66 (0.4, 1.09)         | 0.82 (0.46, 1.49) | 0.85 (0.57, 1.27) | 0.9 (0.55, 1.5)   | <b>4-IIV MF59/AS03-adj</b> | 0.96 (0.61, 1.54) | 0.91 (0.6, 1.38)  |
| 0.85 (0.63, 1.17) | 0.78 (0.59, 1.03)        | 0.96 (0.71, 1.28)        | 0.86 (0.63, 1.17) | 0.95 (0.69, 1.27)          | 0.68 (0.43, 1.07)        | 0.85 (0.5, 1.46)  | 0.88 (0.69, 1.12) | 0.93 (0.61, 1.43) | 1.04 (0.65, 1.63)          | <b>4-RIV</b>      | 0.94 (0.67, 1.32) |
| 0.91 (0.74, 1.11) | 0.83 (0.68, 1.01)        | 1.02 (0.79, 1.3)         | 0.91 (0.72, 1.16) | 1.01 (0.79, 1.27)          | 0.73 (0.48, 1.09)        | 0.91 (0.55, 1.5)  | 0.94 (0.73, 1.19) | 0.99 (0.67, 1.47) | 1.1 (0.72, 1.66)           | 1.06 (0.76, 1.5)  | <b>3-LAIV</b>     |

The estimate is located at the intersection of the column-defining vaccine and the row-defining vaccine. Data are RRs (95% CrI). Significant results are in bold. In the upper triangle, comparisons of treatments should be read from right to left. An RR below 1 favors the medication on the bottom right vs. the medication on the top left in the diagonal.

\* **Placebo:** placebo/no vaccine; **3-IIV:** trivalent inactivated intramuscular; **3-IIV HD:** trivalent inactivated high dose intramuscular; **3-IIV ID:** trivalent inactivated intradermal; **3-IIV MF59/AS03-adj:** trivalent inactivated adjuvanted with MF59/AS03 intramuscular; **3-IIV vir/lip-adj:** trivalent inactivated adjuvanted with Virosome/liposome intramuscular; **3-RIV:** trivalent recombinant intramuscular; **4-IIV:** quadrivalent inactivated intramuscular; **4-IIV HD:** quadrivalent inactivated high dose intramuscular; **4-IIV ID:** quadrivalent inactivated intradermal; **4-IIV MF59/AS03-adj:** quadrivalent inactivated adjuvanted with MF59/AS03 intramuscular; **4-IIV vir/lip-adj:** quadrivalent inactivated adjuvanted with virosome/liposome intramuscular; **4-RIV:** quadrivalent recombinant intramuscular; **3-LAIV:** trivalent live attenuated intranasal; **4-LAIV:** quadrivalent live attenuated intranasal.

**Adult and the elderly, immunocompromised-cancer participants: Network geometry of any systemic adverse event\***

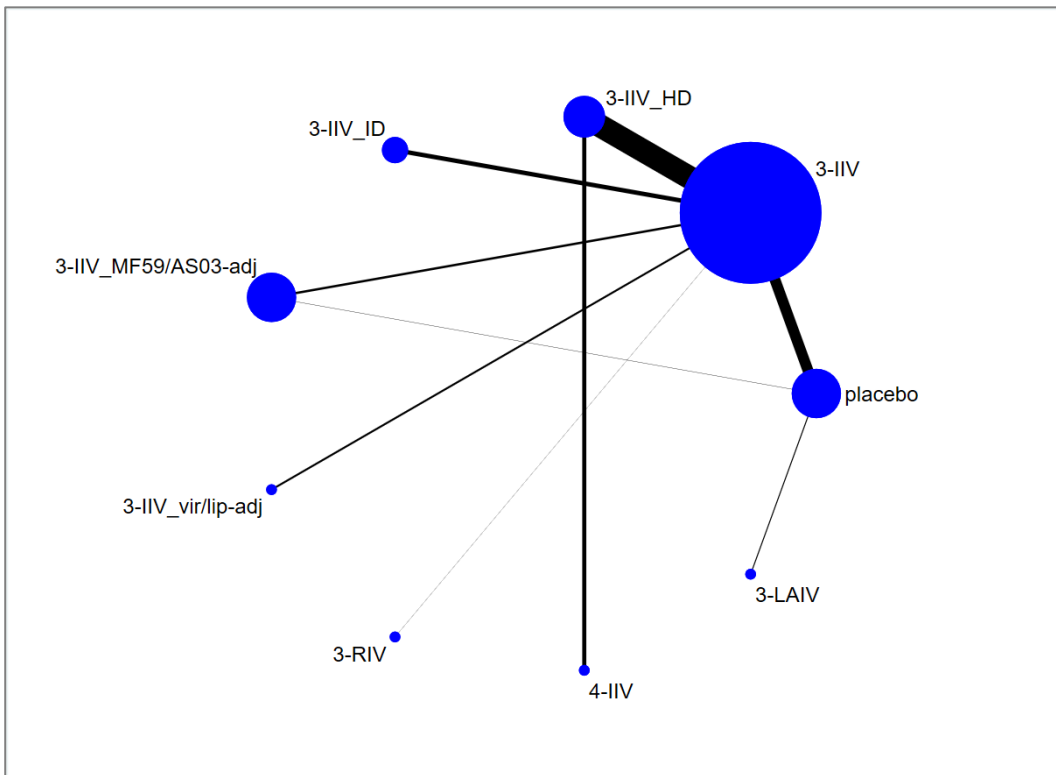

The thickness of the line is proportional to the precision of each direct estimate, and the width of each circle is proportional to the number of studies included in the treatment.

\* **Placebo:** placebo/no vaccine; **3-IIV:** trivalent inactivated intramuscular; **3-IIV HD:** trivalent inactivated high dose intramuscular; **3-IIV ID:** trivalent inactivated intradermal; **3-IIV MF59/AS03-adj:** trivalent inactivated adjuvanted with MF59/ASO3 intramuscular; **3-IIV vir/lip-adj:** trivalent inactivated adjuvanted with Virosome/liposome intramuscular; **3-RIV:** trivalent recombinant intramuscular; **4-IIV:** quadrivalent inactivated intramuscular; **4-IIV HD:** quadrivalent inactivated high dose intramuscular; **4-IIV ID:** quadrivalent inactivated intradermal; **4-IIV MF59/AS03-adj:** quadrivalent inactivated adjuvanted with MF59/ASO3 intramuscular; **4-IIV vir/lip-adj:** quadrivalent inactivated adjuvanted with virosome/liposome intramuscular; **4-RIV:** quadrivalent recombinant intramuscular; **3-LAIV:** trivalent live attenuated intranasal; **4-LAIV:** quadrivalent live attenuated intranasal.

**Adult and the elderly, immunocompromised-cancer participants: Forest plots of any systemic adverse event, comparison with placebo/no vaccine and with 3-IIV\***

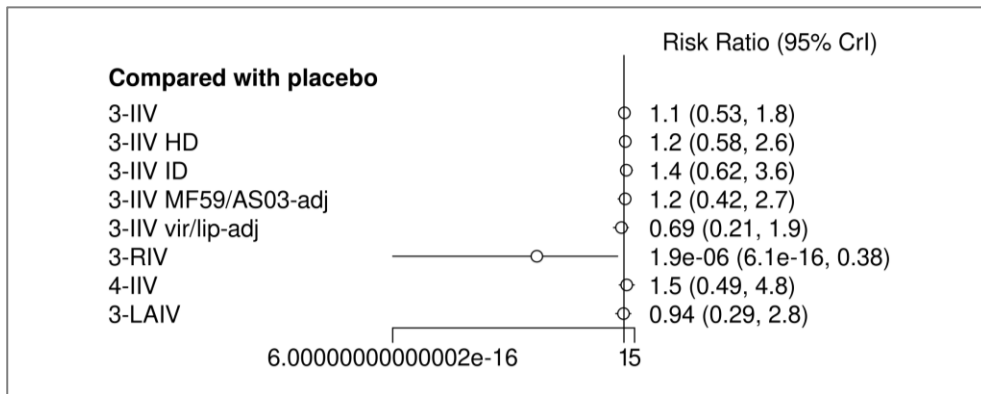

OR <1 favors experimental vaccine compared to placebo or 3-IIV

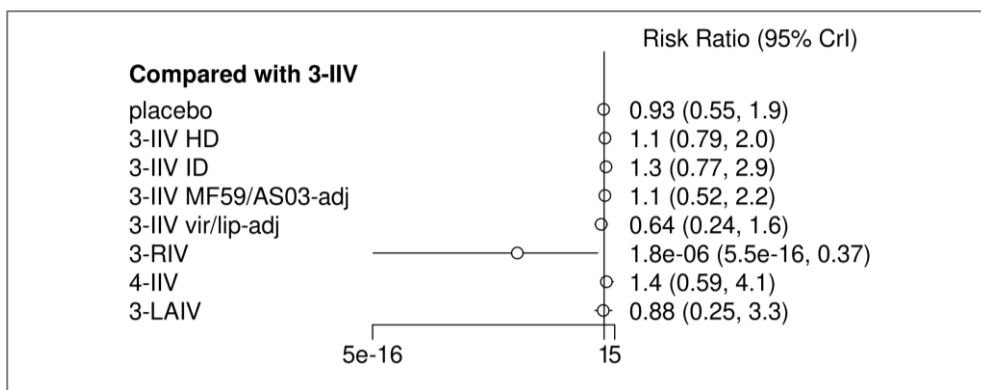

OR <1 favors experimental vaccine compared to placebo or 3-IIV

\* **Placebo:** placebo/no vaccine; **3-IIV:** trivalent inactivated intramuscular; **3-IIV HD:** trivalent inactivated high dose intramuscular; **3-IIV ID:** trivalent inactivated intradermal; **3-IIV MF59/AS03-adj:** trivalent inactivated adjuvanted with MF59/ASO3 intramuscular; **3-IIV vir/lip-adj:** trivalent inactivated adjuvanted with Virosome/liposome intramuscular; **3-RIV:** trivalent recombinant intramuscular; **4-IIV:** quadrivalent inactivated intramuscular; **4-IIV HD:** quadrivalent inactivated high dose intramuscular; **4-IIV ID:** quadrivalent inactivated intradermal; **4-IIV MF59/AS03-adj:** quadrivalent inactivated adjuvanted with MF59/ASO3 intramuscular; **4-IIV vir/lip-adj:** quadrivalent inactivated adjuvanted with virosome/liposome intramuscular; **4-RIV:** quadrivalent recombinant intramuscular; **3-LAIV:** trivalent live attenuated intranasal; **4-LAIV:** quadrivalent live attenuated intranasal.



**Adult and the elderly, immunocompromised-cancer participants: Netleague analysis of any systemic adverse event\***

|                                          |                                         |                                          |                                          |                                           |                                           |                    |                                           |                                          |
|------------------------------------------|-----------------------------------------|------------------------------------------|------------------------------------------|-------------------------------------------|-------------------------------------------|--------------------|-------------------------------------------|------------------------------------------|
| <b>placebo</b>                           | 1.08 (0.53, 1.83)                       | 1.22 (0.58, 2.63)                        | 1.42 (0.62, 3.62)                        | 1.2 (0.42, 2.72)                          | 0.69 (0.21, 1.95)                         | <b>0 (0, 0.38)</b> | 1.52 (0.49, 4.76)                         | 0.94 (0.29, 2.83)                        |
| 0.93 (0.55, 1.89)                        | <b>3-IIV</b>                            | 1.13 (0.79, 1.98)                        | 1.33 (0.77, 2.91)                        | 1.12 (0.52, 2.24)                         | 0.64 (0.24, 1.65)                         | <b>0 (0, 0.37)</b> | 1.42 (0.59, 4.07)                         | 0.88 (0.25, 3.29)                        |
| 0.82 (0.38, 1.74)                        | 0.88 (0.51, 1.26)                       | <b>3-IIV-HD</b>                          | 1.16 (0.56, 2.68)                        | 0.98 (0.36, 2.12)                         | 0.56 (0.18, 1.47)                         | <b>0 (0, 0.31)</b> | 1.24 (0.53, 2.9)                          | 0.77 (0.19, 2.88)                        |
| 0.7 (0.28, 1.61)                         | 0.75 (0.34, 1.3)                        | 0.86 (0.37, 1.8)                         | <b>3-IIV-ID</b>                          | 0.84 (0.27, 2.03)                         | 0.48 (0.13, 1.36)                         | <b>0 (0, 0.27)</b> | 1.07 (0.33, 3.21)                         | 0.66 (0.15, 2.58)                        |
| 0.83 (0.37, 2.4)                         | 0.89 (0.45, 1.92)                       | 1.02 (0.47, 2.75)                        | 1.19 (0.49, 3.77)                        | <b>3-IIV MF59/AS03-adj</b>                | 0.57 (0.18, 1.97)                         | <b>0 (0, 0.35)</b> | 1.26 (0.43, 4.9)                          | 0.78 (0.2, 3.65)                         |
| 1.46 (0.51, 4.86)                        | 1.56 (0.61, 4.09)                       | 1.79 (0.68, 5.52)                        | 2.09 (0.74, 7.5)                         | 1.77 (0.51, 5.59)                         | <b>3-IIV vir/lip-adj</b>                  | <b>0 (0, 0.62)</b> | 2.22 (0.63, 9.28)                         | 1.37 (0.29, 7.08)                        |
| <b>540422.99 (2.6, 1641730164398524)</b> | <b>543516.4 (2.7, 1808085701935791)</b> | <b>640275.63 (3.2, 2125998396124094)</b> | <b>734852.91 (3.7, 2394122047876191)</b> | <b>657357.39 (2.88, 2209682118404833)</b> | <b>335286.59 (1.62, 1150286171477600)</b> | <b>3-RIV</b>       | <b>808442.48 (3.79, 2574872698940468)</b> | <b>483429.27 (2.2, 1466279156913650)</b> |
| 0.66 (0.21, 2.03)                        | 0.71 (0.25, 1.7)                        | 0.8 (0.35, 1.88)                         | 0.93 (0.31, 3.07)                        | 0.79 (0.2, 2.33)                          | 0.45 (0.11, 1.58)                         | <b>0 (0, 0.26)</b> | <b>4-IIV</b>                              | 0.62 (0.12, 2.92)                        |
| 1.07 (0.35, 3.45)                        | 1.14 (0.3, 4.02)                        | 1.3 (0.35, 5.18)                         | 1.52 (0.39, 6.73)                        | 1.28 (0.27, 5.04)                         | 0.73 (0.14, 3.44)                         | <b>0 (0, 0.46)</b> | 1.62 (0.34, 8.21)                         | <b>3-LAIV</b>                            |

The estimate is located at the intersection of the column-defining vaccine and the row-defining vaccine. Data are RRs (95% CrI). Significant results are in bold. In the upper triangle, comparisons of treatments should be read from right to left. An RR below 1 favors the medication on the bottom right vs. the medication on the top left in the diagonal.

\* **Placebo:** placebo/no vaccine; **3-IIV:** trivalent inactivated intramuscular; **3-IIV HD:** trivalent inactivated high dose intramuscular; **3-IIV ID:** trivalent inactivated intradermal; **3-IIV MF59/AS03-adj:** trivalent inactivated adjuvanted with MF59/ASO3 intramuscular; **3-IIV vir/lip-adj:** trivalent inactivated adjuvanted with Virosome/liposome intramuscular; **3-RIV:** trivalent recombinant intramuscular; **4-IIV:** quadrivalent inactivated intramuscular; **4-IIV HD:** quadrivalent inactivated high dose intramuscular; **4-IIV ID:** quadrivalent inactivated intradermal; **4-IIV MF59/AS03-adj:** quadrivalent inactivated adjuvanted with MF59/ASO3 intramuscular; **4-IIV vir/lip-adj:** quadrivalent inactivated adjuvanted with virosome/liposome intramuscular; **4-RIV:** quadrivalent recombinant intramuscular; **3-LAIV:** trivalent live attenuated intranasal; **4-LAIV:** quadrivalent live attenuated intranasal.

**All children: Network geometry of any systemic adverse event\***

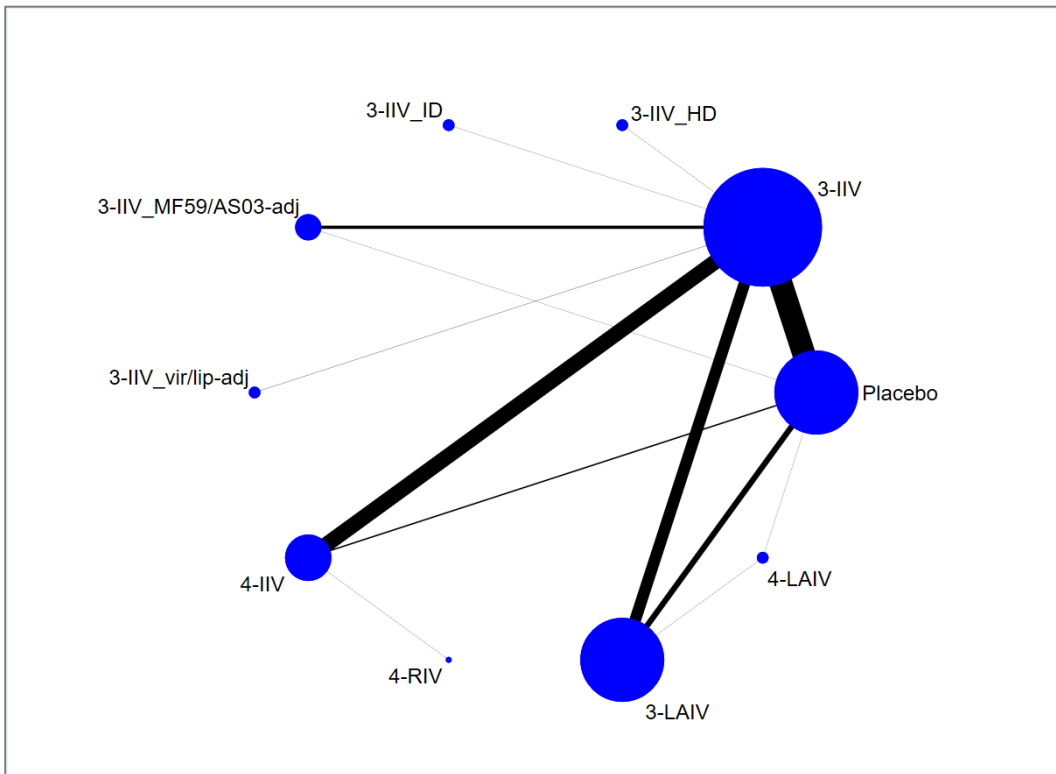

The thickness of the line is proportional to the precision of each direct estimate, and the width of each circle is proportional to the number of studies included in the treatment.

\* **Placebo**: placebo/no vaccine; **3-IIV**: trivalent inactivated intramuscular; **3-IIV HD**: trivalent inactivated high dose intramuscular; **3-IIV ID**: trivalent inactivated intradermal; **3-IIV MF59/AS03-adj**: trivalent inactivated adjuvanted with MF59/ASO3 intramuscular; **3-IIV vir/lip-adj**: trivalent inactivated adjuvanted with Virosome/liposome intramuscular; **3-RIV**: trivalent recombinant intramuscular; **4-IIV**: quadrivalent inactivated intramuscular; **4-IIV HD**: quadrivalent inactivated high dose intramuscular; **4-IIV ID**: quadrivalent inactivated intradermal; **4-IIV MF59/AS03-adj**: quadrivalent inactivated adjuvanted with MF59/ASO3 intramuscular; **4-IIV vir/lip-adj**: quadrivalent inactivated adjuvanted with virosome/liposome intramuscular; **4-RIV**: quadrivalent recombinant intramuscular; **3-LAIV**: trivalent live attenuated intranasal; **4-LAIV**: quadrivalent live attenuated intranasal.

**All children: Forest plots of any systemic adverse event, comparison with placebo/no vaccine and with 3-IIV\***

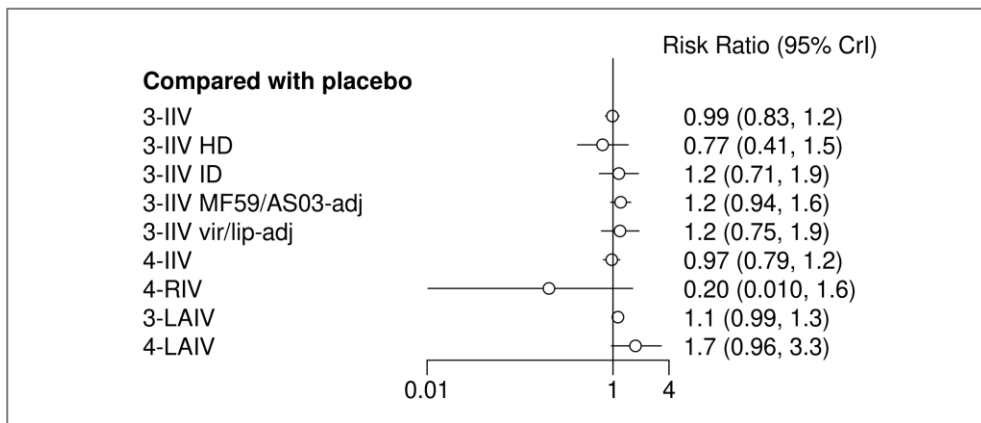

OR <1 favors experimental vaccine compared to placebo or 3-IIV

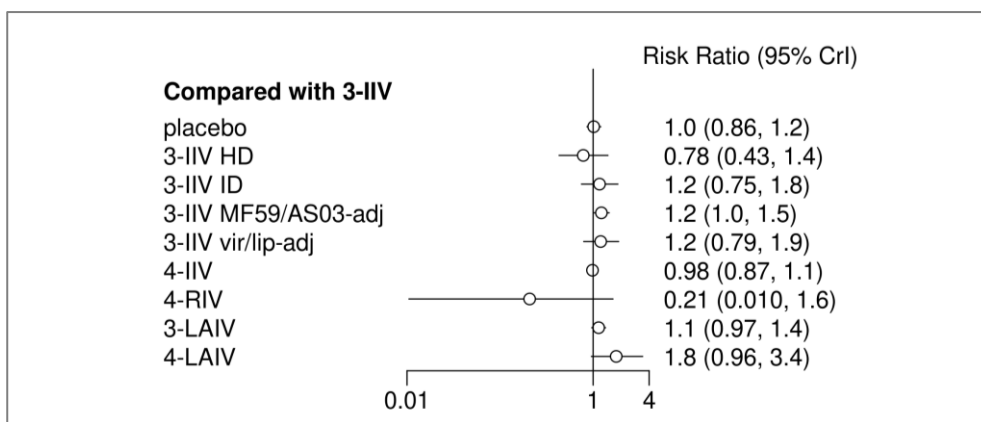

OR <1 favors experimental vaccine compared to placebo or 3-IIV

\* **Placebo:** placebo/no vaccine; **3-IIV:** trivalent inactivated intramuscular; **3-IIV HD:** trivalent inactivated high dose intramuscular; **3-IIV ID:** trivalent inactivated intradermal; **3-IIV MF59/AS03-adj:** trivalent inactivated adjuvanted with MF59/ASO3 intramuscular; **3-IIV vir/lip-adj:** trivalent inactivated adjuvanted with Virosome/liposome intramuscular; **3-RIV:** trivalent recombinant intramuscular; **4-IIV:** quadrivalent inactivated intramuscular; **4-IIV HD:** quadrivalent inactivated high dose intramuscular; **4-IIV ID:** quadrivalent inactivated intradermal; **4-IIV MF59/AS03-adj:** quadrivalent inactivated adjuvanted with MF59/ASO3 intramuscular; **4-IIV vir/lip-adj:** quadrivalent inactivated adjuvanted with virosome/liposome intramuscular; **4-RIV:** quadrivalent recombinant intramuscular; **3-LAIV:** trivalent live attenuated intranasal; **4-LAIV:** quadrivalent live attenuated intranasal.

All children: Netleague analysis of any systemic adverse event\*

|                    |                          |                   |                     |                            |                          |                   |                          |                    |                           |
|--------------------|--------------------------|-------------------|---------------------|----------------------------|--------------------------|-------------------|--------------------------|--------------------|---------------------------|
| <b>placebo</b>     | 0.99 (0.83, 1.16)        | 0.77 (0.41, 1.45) | 1.15 (0.71, 1.87)   | 1.21 (0.94, 1.55)          | 1.19 (0.75, 1.9)         | 0.97 (0.79, 1.18) | 0.2 (0.01, 1.63)         | 1.13 (0.99, 1.28)  | 1.75 (0.96, 3.3)          |
| 1.01 (0.86, 1.21)  | <b>3-IIV</b>             | 0.78 (0.43, 1.44) | 1.17 (0.75, 1.85)   | <b>1.23 (1.02, 1.49)</b>   | 1.21 (0.79, 1.88)        | 0.98 (0.87, 1.12) | 0.21 (0.01, 1.64)        | 1.15 (0.97, 1.36)  | 1.77 (0.96, 3.41)         |
| 1.3 (0.69, 2.41)   | 1.28 (0.69, 2.32)        | <b>3-IIV HD</b>   | 1.5 (0.7, 3.19)     | 1.57 (0.83, 2.94)          | 1.54 (0.73, 3.24)        | 1.26 (0.67, 2.31) | 0.26 (0.01, 2.28)        | 1.46 (0.77, 2.72)  | 2.27 (0.95, 5.45)         |
| 0.87 (0.53, 1.4)   | 0.85 (0.54, 1.33)        | 0.67 (0.31, 1.42) | <b>3-IIV ID</b>     | 1.05 (0.64, 1.71)          | 1.03 (0.55, 1.94)        | 0.84 (0.52, 1.34) | 0.18 (0.01, 1.48)        | 0.98 (0.6, 1.58)   | 1.51 (0.7, 3.35)          |
| 0.83 (0.64, 1.06)  | <b>0.82 (0.67, 0.98)</b> | 0.64 (0.34, 1.2)  | 0.95 (0.59, 1.56)   | <b>3-IIV MF59/AS03-adj</b> | 0.98 (0.62, 1.58)        | 0.8 (0.64, 1)     | 0.17 (0.01, 1.34)        | 0.93 (0.72, 1.2)   | 1.44 (0.76, 2.84)         |
| 0.84 (0.53, 1.33)  | 0.83 (0.53, 1.26)        | 0.65 (0.31, 1.37) | 0.97 (0.52, 1.81)   | 1.02 (0.63, 1.62)          | <b>3-IIV vir/lip-adj</b> | 0.82 (0.52, 1.26) | 0.17 (0.01, 1.41)        | 0.95 (0.59, 1.5)   | 1.47 (0.69, 3.2)          |
| 1.03 (0.84, 1.27)  | 1.02 (0.9, 1.15)         | 0.8 (0.43, 1.49)  | 1.19 (0.75, 1.91)   | 1.25 (1, 1.57)             | 1.22 (0.79, 1.94)        | <b>4-IIV</b>      | 0.21 (0.01, 1.66)        | 1.17 (0.95, 1.43)  | 1.8 (0.96, 3.5)           |
| 4.89 (0.61, 97.48) | 4.81 (0.61, 95.31)       | 3.8 (0.44, 76.63) | 5.66 (0.68, 114.54) | 5.91 (0.75, 116.85)        | 5.82 (0.71, 114.47)      | 4.73 (0.6, 93.43) | <b>4-RIV</b>             | 5.52 (0.7, 109.88) | <b>8.6 (1.01, 184.89)</b> |
| 0.88 (0.78, 1.01)  | 0.87 (0.74, 1.03)        | 0.68 (0.37, 1.29) | 1.02 (0.63, 1.67)   | 1.07 (0.84, 1.38)          | 1.05 (0.67, 1.69)        | 0.86 (0.7, 1.05)  | 0.18 (0.01, 1.44)        | <b>3-LAIV</b>      | 1.55 (0.85, 2.93)         |
| 0.57 (0.3, 1.04)   | 0.56 (0.29, 1.04)        | 0.44 (0.18, 1.05) | 0.66 (0.3, 1.42)    | 0.69 (0.35, 1.32)          | 0.68 (0.31, 1.45)        | 0.56 (0.29, 1.04) | <b>0.12 (0.01, 0.99)</b> | 0.65 (0.34, 1.18)  | <b>4-LAIV</b>             |

The estimate is located at the intersection of the column-defining vaccine and the row-defining vaccine. Data are RRs (95% CrI). Significant results are in bold. In the upper triangle, comparisons of treatments should be read from right to left. An RR below 1 favors the medication on the bottom right vs. the medication on the top left in the diagonal.

\* **Placebo**: placebo/no vaccine; **3-IIV**: trivalent inactivated intramuscular; **3-IIV HD**: trivalent inactivated high dose intramuscular; **3-IIV ID**: trivalent inactivated intradermal; **3-IIV MF59/AS03-adj**: trivalent inactivated adjuvanted with MF59/AS03 intramuscular; **3-IIV vir/lip-adj**: trivalent inactivated adjuvanted with Virosome/liposome intramuscular; **3-RIV**: trivalent recombinant intramuscular; **4-IIV**: quadrivalent inactivated intramuscular; **4-IIV HD**: quadrivalent inactivated high dose intramuscular; **4-IIV ID**: quadrivalent inactivated intradermal; **4-IIV MF59/AS03-adj**: quadrivalent inactivated adjuvanted with MF59/AS03 intramuscular; **4-IIV vir/lip-adj**: quadrivalent inactivated adjuvanted with virosome/liposome intramuscular; **4-RIV**: quadrivalent recombinant intramuscular; **3-LAIV**: trivalent live attenuated intranasal; **4-LAIV**: quadrivalent live attenuated intranasal.

**Children, aged  $\leq 5$  years: Network geometry of any systemic adverse event\***

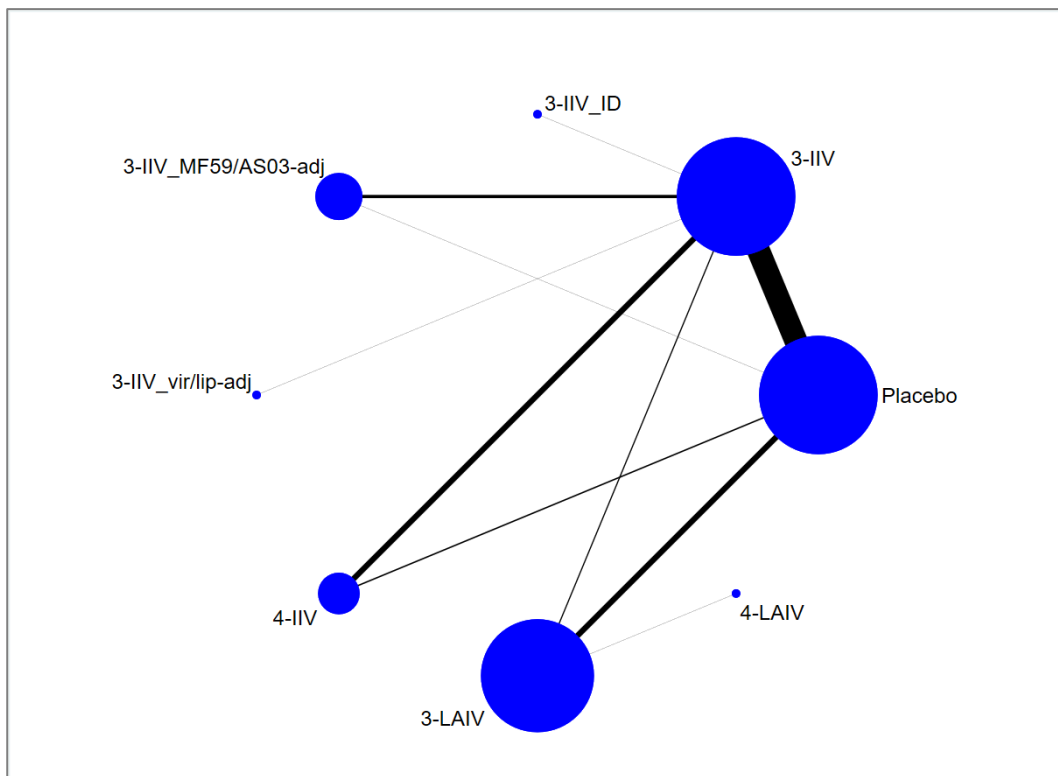

The thickness of the line is proportional to the precision of each direct estimate, and the width of each circle is proportional to the number of studies included in the treatment.

\* **Placebo**: placebo/no vaccine; **3-IIV**: trivalent inactivated intramuscular; **3-IIV HD**: trivalent inactivated high dose intramuscular; **3-IIV ID**: trivalent inactivated intradermal; **3-IIV MF59/AS03-adj**: trivalent inactivated adjuvanted with MF59/ASO3 intramuscular; **3-IIV vir/lip-adj**: trivalent inactivated adjuvanted with Virosome/liposome intramuscular; **3-RIV**: trivalent recombinant intramuscular; **4-IIV**: quadrivalent inactivated intramuscular; **4-IIV HD**: quadrivalent inactivated high dose intramuscular; **4-IIV ID**: quadrivalent inactivated intradermal; **4-IIV MF59/AS03-adj**: quadrivalent inactivated adjuvanted with MF59/ASO3 intramuscular; **4-IIV vir/lip-adj**: quadrivalent inactivated adjuvanted with virosome/liposome intramuscular; **4-RIV**: quadrivalent recombinant intramuscular; **3-LAIV**: trivalent live attenuated intranasal; **4-LAIV**: quadrivalent live attenuated intranasal.

**Children, aged ≤5 years: Forest plots of any systemic adverse event, comparison with placebo/no vaccine and with 3-IIV\***

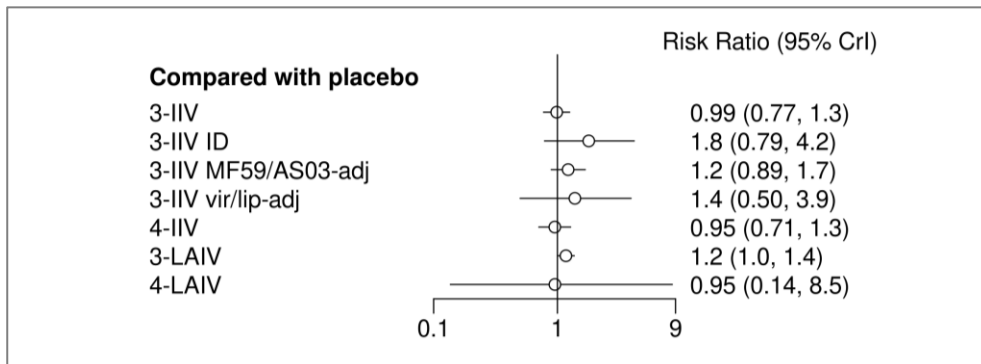

OR <1 favors experimental vaccine compared to placebo or 3-IIV

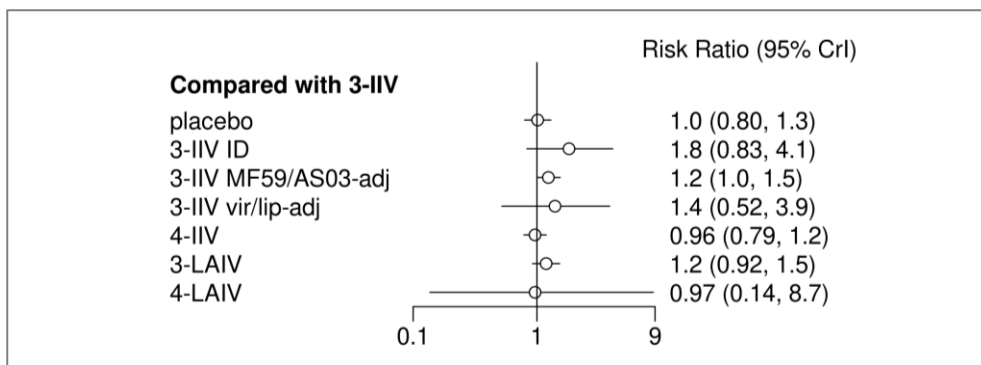

OR <1 favors experimental vaccine compared to placebo or 3-IIV

\* **Placebo:** placebo/no vaccine; **3-IIV:** trivalent inactivated intramuscular; **3-IIV HD:** trivalent inactivated high dose intramuscular; **3-IIV ID:** trivalent inactivated intradermal; **3-IIV MF59/AS03-adj:** trivalent inactivated adjuvanted with MF59/ASO3 intramuscular; **3-IIV vir/lip-adj:** trivalent inactivated adjuvanted with Virosome/liposome intramuscular; **3-RIV:** trivalent recombinant intramuscular; **4-IIV:** quadrivalent inactivated intramuscular; **4-IIV HD:** quadrivalent inactivated high dose intramuscular; **4-IIV ID:** quadrivalent inactivated intradermal; **4-IIV MF59/AS03-adj:** quadrivalent inactivated adjuvanted with MF59/ASO3 intramuscular; **4-IIV vir/lip-adj:** quadrivalent inactivated adjuvanted with virosome/liposome intramuscular; **4-RIV:** quadrivalent recombinant intramuscular; **3-LAIV:** trivalent live attenuated intranasal; **4-LAIV:** quadrivalent live attenuated intranasal.

**Children, aged ≤5 years: Netleague analysis of any systemic adverse event\***

|                   |                   |                    |                            |                          |                   |                   |                   |
|-------------------|-------------------|--------------------|----------------------------|--------------------------|-------------------|-------------------|-------------------|
| <b>placebo</b>    | 0.99 (0.77, 1.26) | 1.79 (0.79, 4.18)  | 1.22 (0.89, 1.68)          | 1.38 (0.5, 3.94)         | 0.95 (0.71, 1.28) | 1.17 (1, 1.37)    | 0.95 (0.14, 8.48) |
| 1.01 (0.8, 1.29)  | <b>3-IIV</b>      | 1.82 (0.83, 4.09)  | 1.24 (1, 1.54)             | 1.4 (0.52, 3.87)         | 0.96 (0.79, 1.19) | 1.19 (0.92, 1.53) | 0.97 (0.14, 8.7)  |
| 0.56 (0.24, 1.27) | 0.55 (0.24, 1.2)  | <b>3-IIV ID</b>    | 0.68 (0.29, 1.54)          | 0.77 (0.22, 2.76)        | 0.53 (0.23, 1.19) | 0.65 (0.28, 1.49) | 0.53 (0.07, 5.47) |
| 0.82 (0.6, 1.12)  | 0.81 (0.65, 1)    | 1.47 (0.65, 3.4)   | <b>3-IIV MF59/AS03-adj</b> | 1.13 (0.41, 3.21)        | 0.78 (0.58, 1.05) | 0.96 (0.69, 1.32) | 0.78 (0.11, 7.05) |
| 0.72 (0.25, 2)    | 0.71 (0.26, 1.92) | 1.29 (0.36, 4.63)  | 0.88 (0.31, 2.43)          | <b>3-IIV vir/lip-adj</b> | 0.69 (0.24, 1.89) | 0.85 (0.3, 2.35)  | 0.69 (0.08, 7.53) |
| 1.05 (0.78, 1.41) | 1.04 (0.84, 1.27) | 1.88 (0.84, 4.35)  | 1.28 (0.96, 1.73)          | 1.45 (0.53, 4.1)         | <b>4-IIV</b>      | 1.23 (0.9, 1.67)  | 1 (0.14, 9.13)    |
| 0.85 (0.73, 1)    | 0.84 (0.66, 1.08) | 1.53 (0.67, 3.58)  | 1.04 (0.76, 1.45)          | 1.18 (0.43, 3.36)        | 0.81 (0.6, 1.11)  | <b>3 LAIV</b>     | 0.81 (0.12, 7.16) |
| 1.05 (0.12, 7.33) | 1.03 (0.11, 7.32) | 1.88 (0.18, 15.32) | 1.28 (0.14, 9.15)          | 1.44 (0.13, 12.84)       | 1 (0.11, 7.11)    | 1.23 (0.14, 8.55) | <b>4 LAIV</b>     |

The estimate is located at the intersection of the column-defining vaccine and the row-defining vaccine. Data are RRs (95% CrI). Significant results are in bold. In the upper triangle, comparisons of treatments should be read from right to left. An RR below 1 favors the medication on the bottom right vs. the medication on the top left in the diagonal.

\* **Placebo:** placebo/no vaccine; **3-IIV:** trivalent inactivated intramuscular; **3-IIV HD:** trivalent inactivated high dose intramuscular; **3-IIV ID:** trivalent inactivated intradermal; **3-IIV MF59/AS03-adj:** trivalent inactivated adjuvanted with MF59/ASO3 intramuscular; **3-IIV vir/lip-adj:** trivalent inactivated adjuvanted with Virosome/liposome intramuscular; **3-RIV:** trivalent recombinant intramuscular; **4-IIV:** quadrivalent inactivated intramuscular; **4-IIV HD:** quadrivalent inactivated high dose intramuscular; **4-IIV ID:** quadrivalent inactivated intradermal; **4-IIV MF59/AS03-adj:** quadrivalent inactivated adjuvanted with MF59/ASO3 intramuscular; **4-IIV vir/lip-adj:** quadrivalent inactivated adjuvanted with virosome/liposome intramuscular; **4-RIV:** quadrivalent recombinant intramuscular; **3-LAIV:** trivalent live attenuated intranasal; **4-LAIV:** quadrivalent live attenuated intranasal.

**Adults and the elderly: Network geometry of any local adverse event\***

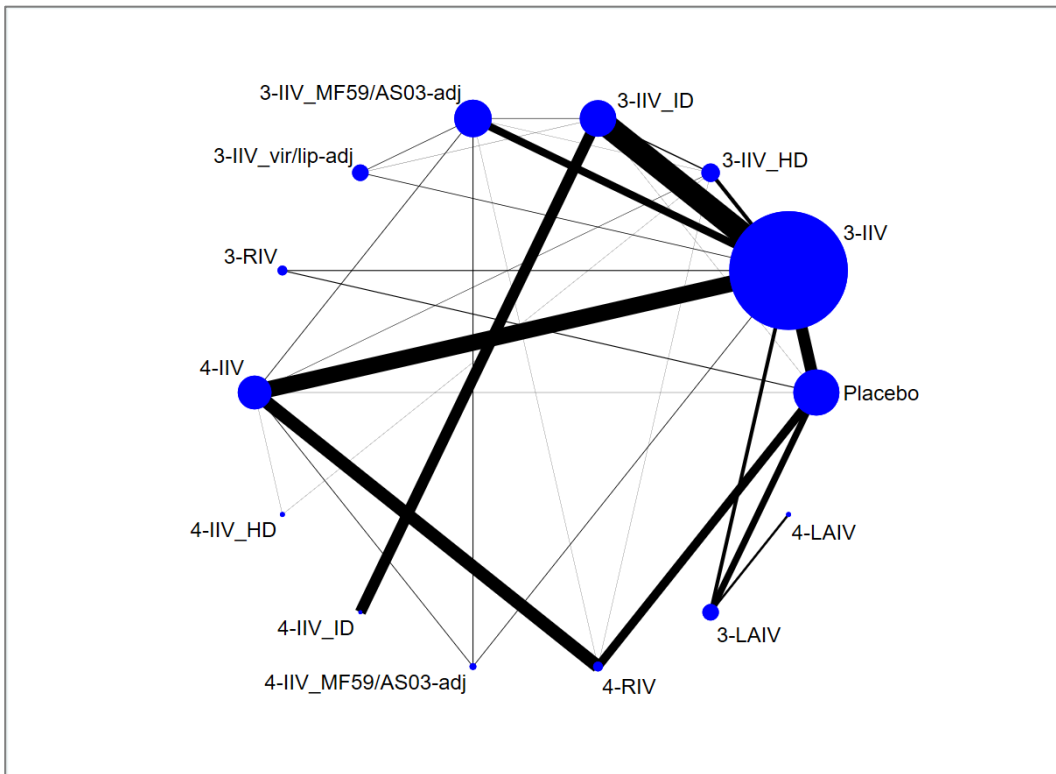

The thickness of the line is proportional to the precision of each direct estimate, and the width of each circle is proportional to the number of studies included in the treatment.

\* **Placebo:** placebo/no vaccine; **3-IIV:** trivalent inactivated intramuscular; **3-IIV HD:** trivalent inactivated high dose intramuscular; **3-IIV ID:** trivalent inactivated intradermal; **3-IIV MF59/AS03-adj:** trivalent inactivated adjuvanted with MF59/ASO3 intramuscular; **3-IIV vir/lip-adj:** trivalent inactivated adjuvanted with Virosome/liposome intramuscular; **3-RIV:** trivalent recombinant intramuscular; **4-IIV:** quadrivalent inactivated intramuscular; **4-IIV HD:** quadrivalent inactivated high dose intramuscular; **4-IIV ID:** quadrivalent inactivated intradermal; **4-IIV MF59/AS03-adj:** quadrivalent inactivated adjuvanted with MF59/ASO3 intramuscular; **4-IIV vir/lip-adj:** quadrivalent inactivated adjuvanted with virosome/liposome intramuscular; **4-RIV:** quadrivalent recombinant intramuscular; **3-LAIV:** trivalent live attenuated intranasal; **4-LAIV:** quadrivalent live attenuated intranasal.



**Adults and the elderly: Forest plots of any local adverse event, comparison with placebo/no vaccine and with 3-IIV\***

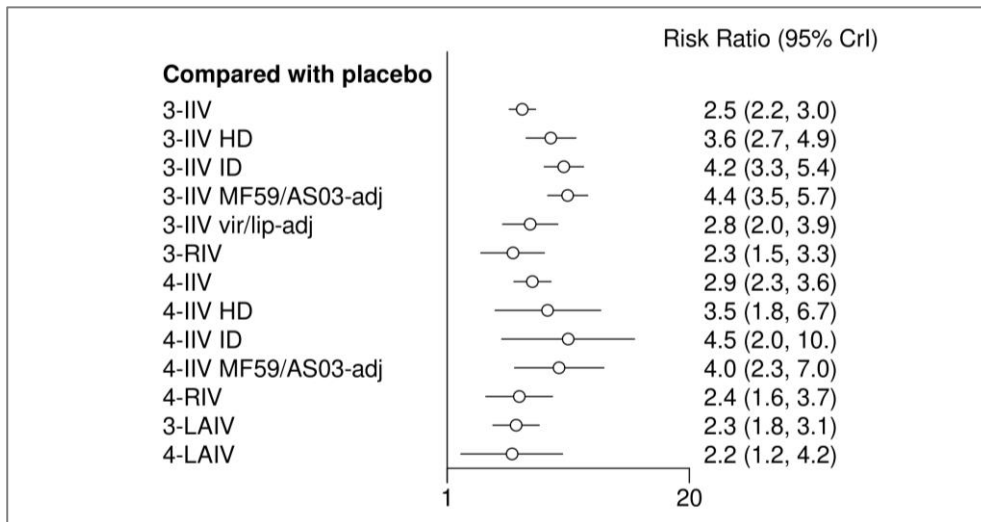

OR <1 favors experimental vaccine compared to placebo or 3-IIV

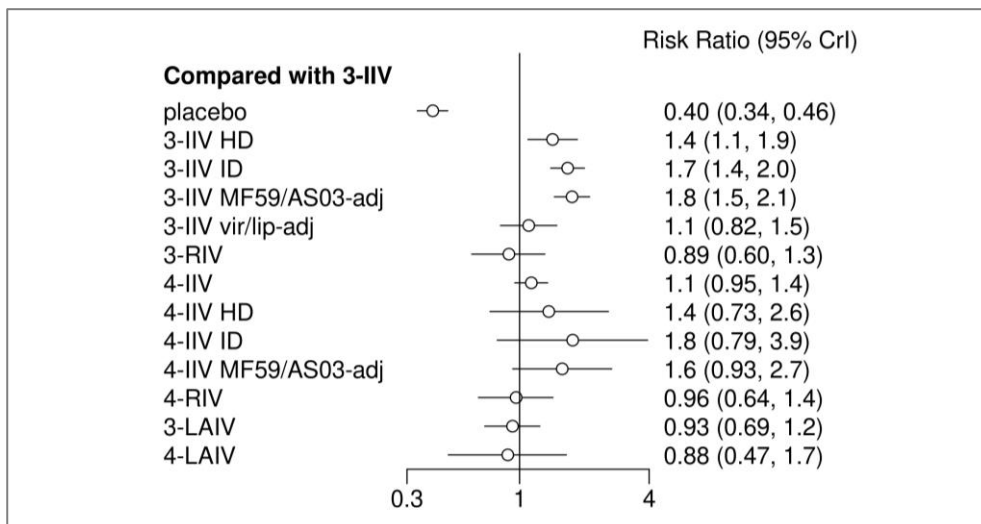

OR <1 favors experimental vaccine compared to placebo or 3-IIV

\* **Placebo:** placebo/no vaccine; **3-IIV:** trivalent inactivated intramuscular; **3-IIV HD:** trivalent inactivated high dose intramuscular; **3-IIV ID:** trivalent inactivated intradermal; **3-IIV MF59/AS03-adj:** trivalent inactivated adjuvanted with MF59/ASO3 intramuscular; **3-IIV vir/lip-adj:** trivalent inactivated adjuvanted with Virosome/liposome intramuscular; **3-RIV:** trivalent recombinant intramuscular; **4-IIV:** quadrivalent inactivated intramuscular; **4-IIV HD:** quadrivalent inactivated high dose intramuscular; **4-IIV ID:** quadrivalent inactivated intradermal; **4-IIV MF59/AS03-adj:** quadrivalent inactivated adjuvanted with MF59/ASO3 intramuscular; **4-IIV vir/lip-adj:** quadrivalent inactivated adjuvanted with virosome/liposome intramuscular; **4-RIV:** quadrivalent recombinant intramuscular; **3-LAIV:** trivalent live attenuated intranasal; **4-LAIV:** quadrivalent live attenuated intranasal.

Adults and the elderly: Netleague analysis of any local adverse event\*

|                   |                   |                   |                   |                     |                   |                   |                   |                   |                    |                     |                   |                   |                   |
|-------------------|-------------------|-------------------|-------------------|---------------------|-------------------|-------------------|-------------------|-------------------|--------------------|---------------------|-------------------|-------------------|-------------------|
| placebo           | 2.53 (2.16, 2.98) | 3.6 (2.66, 4.91)  | 4.23 (3.32, 5.4)  | 4.44 (3.47, 5.69)   | 2.79 (1.99, 3.93) | 2.26 (1.52, 3.33) | 2.87 (2.29, 3.61) | 3.46 (1.81, 6.68) | 4.47 (1.96, 10.15) | 3.99 (2.3, 6.95)    | 2.44 (1.61, 3.68) | 2.35 (1.76, 3.12) | 2.23 (1.18, 4.17) |
| 0.4 (0.34, 0.46)  | 3-IIV             | 1.42 (1.09, 1.86) | 1.67 (1.4, 2)     | 1.75 (1.45, 2.12)   | 1.1 (0.82, 1.49)  | 0.89 (0.6, 1.31)  | 1.13 (0.95, 1.35) | 1.37 (0.73, 2.59) | 1.77 (0.79, 3.93)  | 1.58 (0.93, 2.68)   | 0.96 (0.64, 1.43) | 0.93 (0.69, 1.24) | 0.88 (0.47, 1.65) |
| 0.28 (0.2, 0.38)  | 0.7 (0.54, 0.91)  | 3-IIV HD          | 1.18 (0.86, 1.6)  | 1.23 (0.89, 1.69)   | 0.77 (0.52, 1.15) | 0.63 (0.39, 1)    | 0.8 (0.6, 1.07)   | 0.96 (0.52, 1.8)  | 1.24 (0.53, 2.87)  | 1.11 (0.61, 1.99)   | 0.68 (0.43, 1.07) | 0.65 (0.44, 0.96) | 0.62 (0.31, 1.22) |
| 0.24 (0.19, 0.3)  | 0.6 (0.5, 0.72)   | 0.85 (0.62, 1.17) | 3-IIV ID          | 1.05 (0.82, 1.34)   | 0.66 (0.47, 0.92) | 0.53 (0.35, 0.82) | 0.68 (0.53, 0.87) | 0.82 (0.43, 1.59) | 1.06 (0.48, 2.31)  | 0.94 (0.54, 1.64)   | 0.58 (0.37, 0.89) | 0.55 (0.39, 0.78) | 0.53 (0.27, 1.01) |
| 0.23 (0.18, 0.29) | 0.57 (0.47, 0.69) | 0.81 (0.59, 1.12) | 0.95 (0.75, 1.22) | 3-IIV MF59/AS03-adj | 0.63 (0.46, 0.86) | 0.51 (0.33, 0.78) | 0.65 (0.5, 0.83)  | 0.78 (0.41, 1.52) | 1.01 (0.44, 2.29)  | 0.9 (0.53, 1.52)    | 0.55 (0.35, 0.85) | 0.53 (0.37, 0.75) | 0.5 (0.26, 0.97)  |
| 0.36 (0.25, 0.5)  | 0.91 (0.67, 1.23) | 1.29 (0.87, 1.92) | 1.52 (1.09, 2.11) | 1.59 (1.16, 2.18)   | 3-IIV vir/lip-adj | 0.81 (0.49, 1.32) | 1.03 (0.73, 1.45) | 1.24 (0.62, 2.51) | 1.6 (0.68, 3.75)   | 1.43 (0.79, 2.6)    | 0.87 (0.53, 1.43) | 0.84 (0.55, 1.28) | 0.8 (0.4, 1.6)    |
| 0.44 (0.3, 0.66)  | 1.12 (0.76, 1.67) | 1.6 (1, 2.57)     | 1.88 (1.23, 2.89) | 1.97 (1.28, 3.05)   | 1.24 (0.76, 2.03) | 3-RIV             | 1.27 (0.83, 1.95) | 1.53 (0.73, 3.25) | 1.98 (0.81, 4.86)  | 1.77 (0.92, 3.44)   | 1.08 (0.63, 1.87) | 1.04 (0.65, 1.67) | 0.99 (0.48, 2.07) |
| 0.35 (0.28, 0.44) | 0.88 (0.74, 1.05) | 1.26 (0.94, 1.68) | 1.48 (1.15, 1.89) | 1.55 (1.2, 1.99)    | 0.97 (0.69, 1.37) | 0.79 (0.51, 1.2)  | 4-IIV             | 1.21 (0.65, 2.28) | 1.56 (0.68, 3.53)  | 1.39 (0.81, 2.4)    | 0.85 (0.58, 1.24) | 0.82 (0.58, 1.15) | 0.78 (0.4, 1.49)  |
| 0.29 (0.15, 0.55) | 0.73 (0.39, 1.37) | 1.04 (0.55, 1.94) | 1.22 (0.63, 2.35) | 1.28 (0.66, 2.46)   | 0.81 (0.4, 1.62)  | 0.65 (0.31, 1.37) | 0.83 (0.44, 1.54) | 4-IIV HD          | 1.29 (0.46, 3.58)  | 1.15 (0.51, 2.59)   | 0.7 (0.34, 1.45)  | 0.68 (0.33, 1.35) | 0.64 (0.26, 1.57) |
| 0.22 (0.1, 0.51)  | 0.57 (0.25, 1.27) | 0.81 (0.35, 1.88) | 0.95 (0.43, 2.08) | 0.99 (0.44, 2.27)   | 0.62 (0.27, 1.46) | 0.51 (0.21, 1.24) | 0.64 (0.28, 1.47) | 0.78 (0.28, 2.16) | 4-IIV ID           | 0.89 (0.34, 2.34)   | 0.55 (0.22, 1.34) | 0.53 (0.22, 1.24) | 0.5 (0.18, 1.39)  |
| 0.25 (0.14, 0.43) | 0.63 (0.37, 1.08) | 0.9 (0.5, 1.63)   | 1.06 (0.61, 1.85) | 1.11 (0.66, 1.87)   | 0.7 (0.39, 1.27)  | 0.57 (0.29, 1.09) | 0.72 (0.42, 1.24) | 0.87 (0.39, 1.97) | 1.12 (0.43, 2.93)  | 4-IIV MF59/AS03-adj | 0.61 (0.32, 1.17) | 0.59 (0.32, 1.07) | 0.56 (0.24, 1.27) |
| 0.41 (0.27, 0.62) | 1.04 (0.7, 1.55)  | 1.48 (0.93, 2.35) | 1.73 (1.12, 2.7)  | 1.82 (1.18, 2.82)   | 1.14 (0.7, 1.89)  | 0.93 (0.53, 1.6)  | 1.18 (0.81, 1.73) | 1.42 (0.69, 2.96) | 1.83 (0.75, 4.5)   | 1.64 (0.85, 3.17)   | 4-RIV             | 0.96 (0.59, 1.57) | 0.91 (0.44, 1.91) |
| 0.43 (0.32, 0.57) | 1.08 (0.8, 1.45)  | 1.53 (1.04, 2.29) | 1.8 (1.28, 2.55)  | 1.89 (1.34, 2.69)   | 1.19 (0.78, 1.81) | 0.96 (0.6, 1.54)  | 1.22 (0.87, 1.72) | 1.48 (0.74, 2.99) | 1.9 (0.81, 4.49)   | 1.7 (0.93, 3.14)    | 1.04 (0.64, 1.69) | 3-LAIV            | 0.95 (0.54, 1.66) |
| 0.45 (0.24, 0.84) | 1.13 (0.61, 2.14) | 1.61 (0.82, 3.23) | 1.9 (0.99, 3.68)  | 1.99 (1.03, 3.85)   | 1.25 (0.62, 2.52) | 1.01 (0.48, 2.1)  | 1.29 (0.67, 2.48) | 1.55 (0.64, 3.82) | 2 (0.72, 5.58)     | 1.79 (0.79, 4.1)    | 1.09 (0.52, 2.29) | 1.05 (0.6, 1.84)  | 4-LAIV            |

The estimate is located at the intersection of the column-defining vaccine and the row-defining vaccine. Data are RRs (95% CrI). Significant results are in bold. In the upper triangle, comparisons of treatments should be read from right to left. An RR below 1 favors the medication on the bottom right vs. the medication on the top left in the diagonal.

\* **Placebo**: placebo/no vaccine; **3-IIV**: trivalent inactivated intramuscular; **3-IIV HD**: trivalent inactivated high dose intramuscular; **3-IIV ID**: trivalent inactivated intradermal; **3-IIV MF59/AS03-adj**: trivalent inactivated adjuvanted with MF59/AS03 intramuscular; **3-IIV vir/lip-adj**: trivalent inactivated adjuvanted with Virosome/liposome intramuscular; **3-RIV**: trivalent recombinant intramuscular; **4-IIV**: quadrivalent inactivated intramuscular; **4-IIV HD**: quadrivalent inactivated high dose intramuscular; **4-IIV ID**: quadrivalent inactivated intradermal; **4-IIV MF59/AS03-adj**: quadrivalent inactivated adjuvanted with MF59/AS03 intramuscular; **4-IIV vir/lip-adj**: quadrivalent inactivated adjuvanted with virosome/liposome intramuscular; **4-RIV**: quadrivalent recombinant intramuscular; **3-LAIV**: trivalent live attenuated intranasal; **4-LAIV**: quadrivalent live attenuated intranasal.

**All children: Network geometry of any local adverse event\***

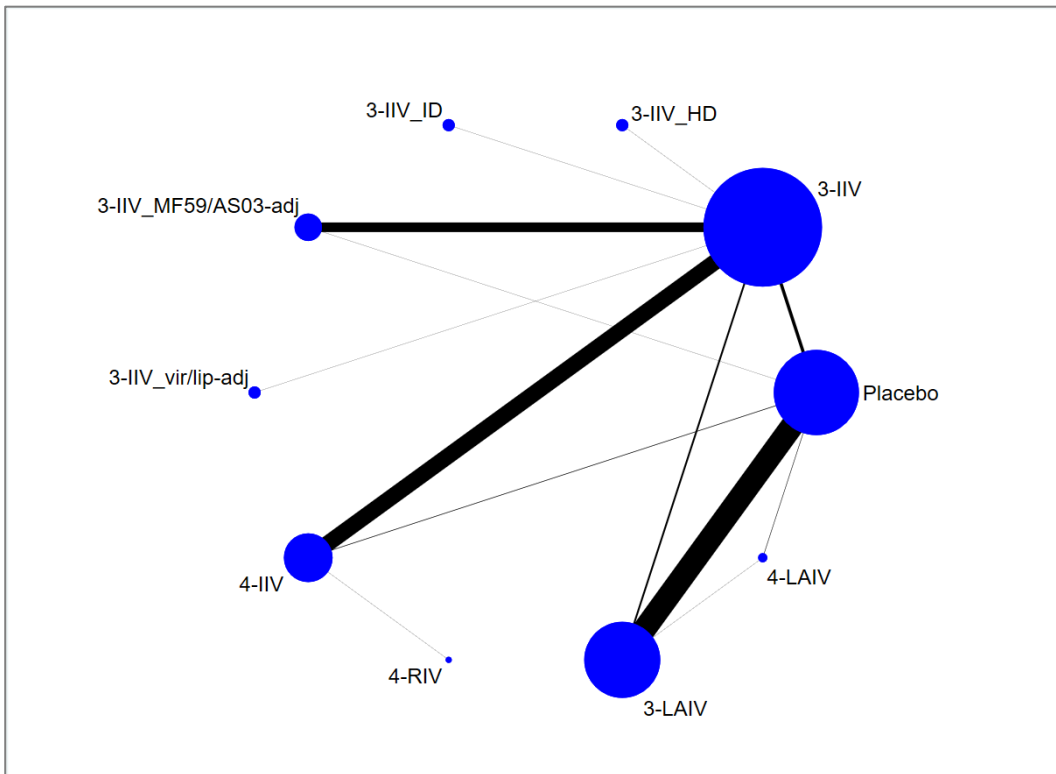

The thickness of the line is proportional to the precision of each direct estimate, and the width of each circle is proportional to the number of studies included in the treatment.

\* **Placebo:** placebo/no vaccine; **3-IIV:** trivalent inactivated intramuscular; **3-IIV HD:** trivalent inactivated high dose intramuscular; **3-IIV ID:** trivalent inactivated intradermal; **3-IIV MF59/AS03-adj:** trivalent inactivated adjuvanted with MF59/ASO3 intramuscular; **3-IIV vir/lip-adj:** trivalent inactivated adjuvanted with Virosome/liposome intramuscular; **3-RIV:** trivalent recombinant intramuscular; **4-IIV:** quadrivalent inactivated intramuscular; **4-IIV HD:** quadrivalent inactivated high dose intramuscular; **4-IIV ID:** quadrivalent inactivated intradermal; **4-IIV MF59/AS03-adj:** quadrivalent inactivated adjuvanted with MF59/ASO3 intramuscular; **4-IIV vir/lip-adj:** quadrivalent inactivated adjuvanted with virosome/liposome intramuscular; **4-RIV:** quadrivalent recombinant intramuscular; **3-LAIV:** trivalent live attenuated intranasal; **4-LAIV:** quadrivalent live attenuated intranasal.

**All children: Forest plots of any local adverse event, comparison with placebo/no vaccine and with 3-IIV\***

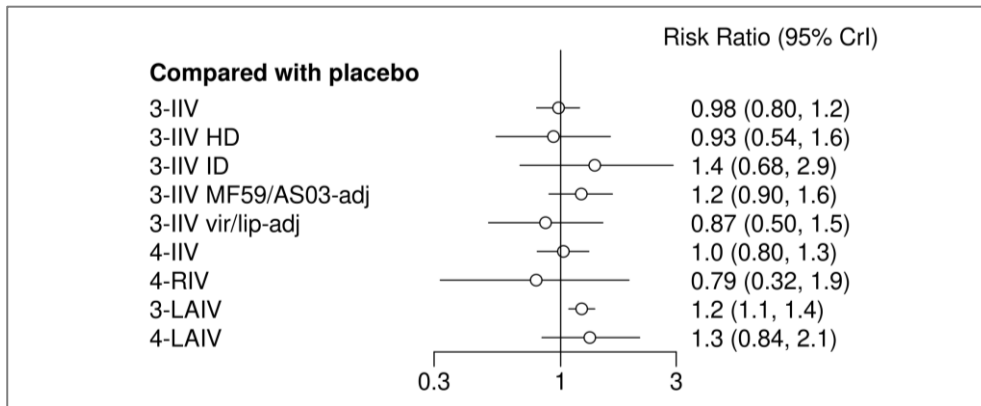

OR <1 favors experimental vaccine compared to placebo or 3-IIV

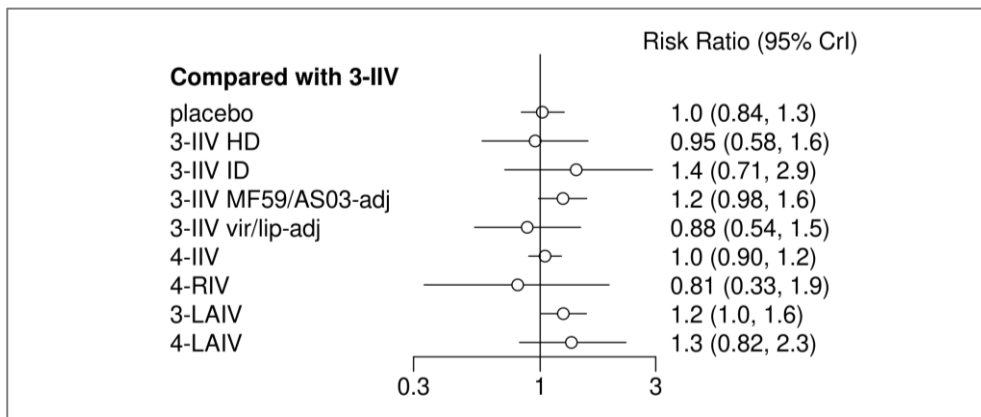

OR <1 favors experimental vaccine compared to placebo or 3-IIV

\* **Placebo:** placebo/no vaccine; **3-IIV:** trivalent inactivated intramuscular; **3-IIV HD:** trivalent inactivated high dose intramuscular; **3-IIV ID:** trivalent inactivated intradermal; **3-IIV MF59/AS03-adj:** trivalent inactivated adjuvanted with MF59/ASO3 intramuscular; **3-IIV vir/lip-adj:** trivalent inactivated adjuvanted with Virosome/liposome intramuscular; **3-RIV:** trivalent recombinant intramuscular; **4-IIV:** quadrivalent inactivated intramuscular; **4-IIV HD:** quadrivalent inactivated high dose intramuscular; **4-IIV ID:** quadrivalent inactivated intradermal; **4-IIV MF59/AS03-adj:** quadrivalent inactivated adjuvanted with MF59/ASO3 intramuscular; **4-IIV vir/lip-adj:** quadrivalent inactivated adjuvanted with virosome/liposome intramuscular; **4-RIV:** quadrivalent recombinant intramuscular; **3-LAIV:** trivalent live attenuated intranasal; **4-LAIV:** quadrivalent live attenuated intranasal.

**All children: Netleague analysis of any local adverse event\***

|                          |                         |                   |                   |                            |                          |                   |                   |                          |                   |
|--------------------------|-------------------------|-------------------|-------------------|----------------------------|--------------------------|-------------------|-------------------|--------------------------|-------------------|
| <b>placebo</b>           | 0.98 (0.8, 1.2)         | 0.93 (0.54, 1.6)  | 1.38 (0.68, 2.91) | 1.22 (0.9, 1.63)           | 0.87 (0.5, 1.49)         | 1.03 (0.8, 1.31)  | 0.79 (0.32, 1.91) | <b>1.22 (1.08, 1.38)</b> | 1.32 (0.84, 2.12) |
| 1.02 (0.84, 1.26)        | <b>3-IIV</b>            | 0.95 (0.58, 1.57) | 1.41 (0.71, 2.91) | 1.24 (0.98, 1.56)          | 0.88 (0.54, 1.47)        | 1.05 (0.9, 1.22)  | 0.81 (0.33, 1.92) | <b>1.25 (1.01, 1.55)</b> | 1.35 (0.82, 2.26) |
| 1.07 (0.62, 1.85)        | 1.05 (0.64, 1.74)       | <b>3-IIV HD</b>   | 1.48 (0.64, 3.6)  | 1.3 (0.75, 2.26)           | 0.93 (0.46, 1.91)        | 1.1 (0.65, 1.86)  | 0.85 (0.31, 2.3)  | 1.31 (0.76, 2.27)        | 1.41 (0.7, 2.92)  |
| 0.72 (0.34, 1.47)        | 0.71 (0.34, 1.4)        | 0.68 (0.28, 1.57) | <b>3-IIV ID</b>   | 0.88 (0.41, 1.8)           | 0.63 (0.26, 1.47)        | 0.74 (0.36, 1.49) | 0.57 (0.18, 1.72) | 0.88 (0.42, 1.8)         | 0.95 (0.4, 2.27)  |
| 0.82 (0.61, 1.12)        | 0.81 (0.64, 1.02)       | 0.77 (0.44, 1.34) | 1.14 (0.56, 2.44) | <b>3-IIV MF59/AS03-adj</b> | 0.71 (0.41, 1.25)        | 0.84 (0.64, 1.12) | 0.65 (0.26, 1.6)  | 1 (0.74, 1.38)           | 1.09 (0.63, 1.92) |
| 1.15 (0.67, 1.98)        | 1.13 (0.68, 1.86)       | 1.08 (0.52, 2.18) | 1.6 (0.68, 3.85)  | 1.4 (0.8, 2.43)            | <b>3-IIV vir/lip-adj</b> | 1.18 (0.7, 2)     | 0.91 (0.33, 2.5)  | 1.41 (0.81, 2.43)        | 1.52 (0.75, 3.14) |
| 0.97 (0.77, 1.25)        | 0.95 (0.82, 1.11)       | 0.91 (0.54, 1.54) | 1.35 (0.67, 2.82) | 1.19 (0.9, 1.56)           | 0.84 (0.5, 1.44)         | <b>4-IIV</b>      | 0.77 (0.32, 1.81) | 1.19 (0.93, 1.54)        | 1.29 (0.77, 2.2)  |
| 1.26 (0.52, 3.14)        | 1.24 (0.52, 3.01)       | 1.18 (0.43, 3.26) | 1.76 (0.58, 5.44) | 1.54 (0.62, 3.84)          | 1.09 (0.4, 3.06)         | 1.3 (0.55, 3.12)  | <b>4-RIV</b>      | 1.54 (0.64, 3.84)        | 1.67 (0.62, 4.68) |
| <b>0.82 (0.72, 0.92)</b> | <b>0.8 (0.64, 0.99)</b> | 0.76 (0.44, 1.32) | 1.13 (0.55, 2.39) | 1 (0.73, 1.35)             | 0.71 (0.41, 1.23)        | 0.84 (0.65, 1.08) | 0.65 (0.26, 1.57) | <b>3-LAIV</b>            | 1.08 (0.68, 1.75) |
| 0.76 (0.47, 1.19)        | 0.74 (0.44, 1.22)       | 0.71 (0.34, 1.43) | 1.05 (0.44, 2.51) | 0.92 (0.52, 1.58)          | 0.66 (0.32, 1.33)        | 0.78 (0.45, 1.3)  | 0.6 (0.21, 1.62)  | 0.93 (0.57, 1.47)        | <b>4-LAIV</b>     |

The estimate is located at the intersection of the column-defining vaccine and the row-defining vaccine. Data are RRs (95% CrI). Significant results are in bold. In the upper triangle, comparisons of treatments should be read from right to left. An RR below 1 favors the medication on the bottom right vs. the medication on the top left in the diagonal.

\* **Placebo:** placebo/no vaccine; **3-IIV:** trivalent inactivated intramuscular; **3-IIV HD:** trivalent inactivated high dose intramuscular; **3-IIV ID:** trivalent inactivated intradermal; **3-IIV MF59/AS03-adj:** trivalent inactivated adjuvanted with MF59/ASO3 intramuscular; **3-IIV vir/lip-adj:** trivalent inactivated adjuvanted with Virosome/liposome intramuscular; **3-RIV:** trivalent recombinant intramuscular; **4-IIV:** quadrivalent inactivated intramuscular; **4-IIV HD:** quadrivalent inactivated high dose intramuscular; **4-IIV ID:** quadrivalent inactivated intradermal; **4-IIV MF59/AS03-adj:** quadrivalent inactivated adjuvanted with MF59/ASO3 intramuscular; **4-IIV vir/lip-adj:** quadrivalent inactivated adjuvanted with virosome/liposome intramuscular; **4-RIV:** quadrivalent recombinant intramuscular; **3-LAIV:** trivalent live attenuated intranasal; **4-LAIV:** quadrivalent live attenuated intranasal.

**Children with pre-existing respiratory diseases: Network geometry of exacerbation chronic respiratory disease\***

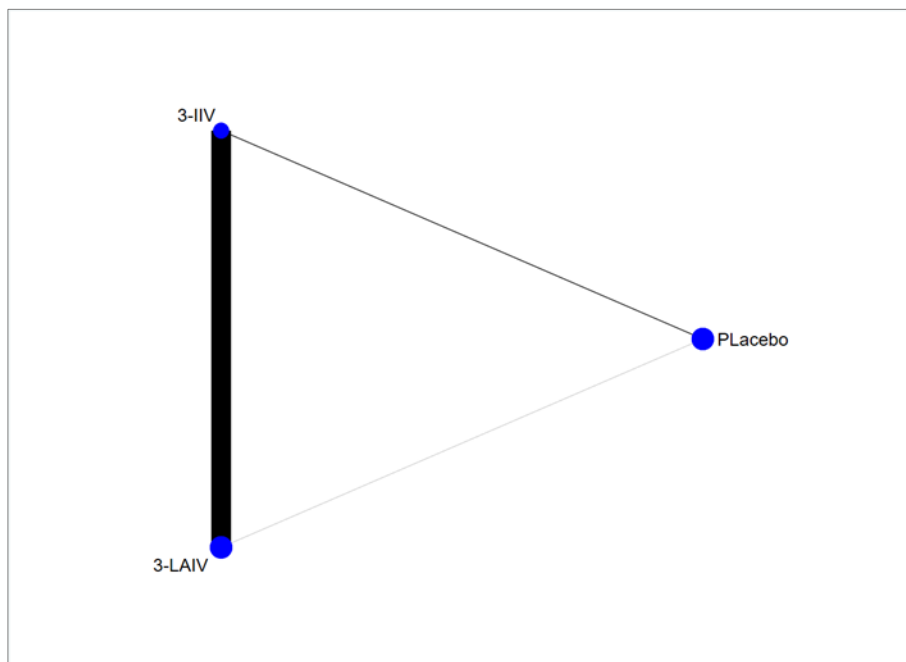

The thickness of the line is proportional to the precision of each direct estimate, and the width of each circle is proportional to the number of studies included in the treatment.

**Children with pre-existing respiratory diseases: Forest plots of exacerbation chronic respiratory disease, comparison with placebo-no vaccine and with 3-IIV\***

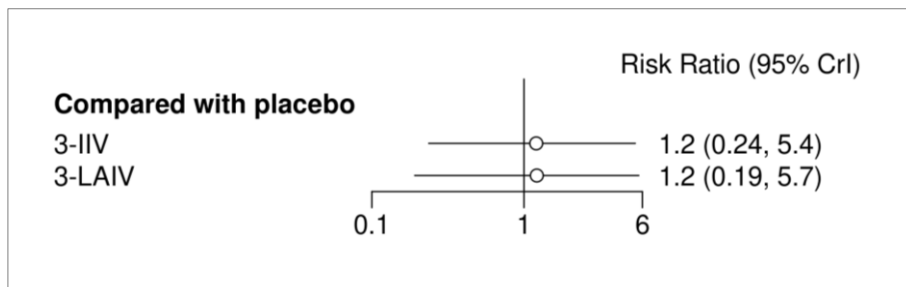

OR <1 favors experimental vaccine compared to placebo or 3-IIV

\* **Placebo:** placebo/no vaccine; **3-IIV:** trivalent inactivated intramuscular; **3-IIV HD:** trivalent inactivated high dose intramuscular; **3-IIV ID:** trivalent inactivated intradermal; **3-IIV MF59/AS03-adj:** trivalent inactivated adjuvanted with MF59/AS03 intramuscular; **3-IIV vir/lip-adj:** trivalent inactivated adjuvanted with Virosome/liposome intramuscular; **3-RIV:** trivalent recombinant intramuscular; **4-IIV:** quadrivalent inactivated intramuscular; **4-IIV HD:** quadrivalent inactivated high dose intramuscular; **4-IIV ID:** quadrivalent inactivated intradermal; **4-IIV MF59/AS03-adj:** quadrivalent inactivated adjuvanted with MF59/AS03 intramuscular; **4-IIV vir/lip-adj:** quadrivalent inactivated adjuvanted with virosome/liposome intramuscular; **4-RIV:** quadrivalent recombinant intramuscular; **3-LAIV:** trivalent live attenuated intranasal; **4-LAIV:** quadrivalent live attenuated intranasal.

**Children with pre-existing respiratory diseases: Netleague analysis of exacerbation chronic respiratory disease\***

|                   |                   |                   |
|-------------------|-------------------|-------------------|
| <b>placebo</b>    | 1.2 (0.24, 5.39)  | 1.21 (0.19, 5.68) |
| 0.83 (0.19, 4.22) | <b>3-IIV</b>      | 1.02 (0.2, 4.26)  |
| 0.82 (0.18, 5.22) | 0.98 (0.23, 5.05) | <b>3-LAIV</b>     |

The estimate is located at the intersection of the column-defining vaccine and the row-defining vaccine. Data are RRs (95% CrI). Significant results are in bold. In the upper triangle, comparisons of treatments should be read from right to left. An RR below 1 favors the medication on the bottom right vs. the medication on the top left in the diagonal.

\* **Placebo:** placebo/no vaccine; **3-IIV:** trivalent inactivated intramuscular; **3-IIV HD:** trivalent inactivated high dose intramuscular; **3-IIV ID:** trivalent inactivated intradermal; **3-IIV MF59/AS03-adj:** trivalent inactivated adjuvanted with MF59/AS03 intramuscular; **3-IIV vir/lip-adj:** trivalent inactivated adjuvanted with Virosome/liposome intramuscular; **3-RIV:** trivalent recombinant intramuscular; **4-IIV:** quadrivalent inactivated intramuscular; **4-IIV HD:** quadrivalent inactivated high dose intramuscular; **4-IIV ID:** quadrivalent inactivated intradermal; **4-IIV MF59/AS03-adj:** quadrivalent inactivated adjuvanted with MF59/AS03 intramuscular; **4-IIV vir/lip-adj:** quadrivalent inactivated adjuvanted with virosome/liposome intramuscular; **4-RIV:** quadrivalent recombinant intramuscular; **3-LAIV:** trivalent live attenuated intranasal; **4-LAIV:** quadrivalent live attenuated intranasal.

### SUCRA Adults and the elderly\*

| vaccine             | laboratory confirmed influenza | any systemic adverse events |
|---------------------|--------------------------------|-----------------------------|
| 3-IIV HD            | 0.80                           | 0.22                        |
| 3-IIV MF59/AS03-adj | 0.69                           | 0.15                        |
| 3-RIV               | 0.67                           | 0.87                        |
| 3-IIV               | 0.66                           | 0.64                        |
| 3-IIV ID            | 0.56                           | 0.58                        |
| 4-RIV               | 0.49                           | 0.40                        |
| 4-IIV               | 0.30                           | 0.56                        |
| 3-LAIV              | 0.29                           | 0.35                        |
| placebo             | 0.02                           | 0.89                        |
| 3-IIV vir/lip-adj   |                                | 0.93                        |
| 4-IIV HD            |                                | 0.44                        |
| 4-IIV ID            |                                | 0.48                        |
| 4-IIV MF59/AS03-adj |                                | 0.07                        |
| 4-LAIV              |                                | 0.41                        |

### SUCRA probability any Children\*

| vaccine             | laboratory confirmed influenza | any systemic adverse events |
|---------------------|--------------------------------|-----------------------------|
| 3-IIV MF59/AS03-adj | 0.95                           |                             |
| 3-LAIV              | 0.79                           | 0.34                        |
| 4-IIV               | 0.47                           | 0.66                        |
| 3-IIV               | 0.42                           | 0.63                        |
| 4-LAIV              | 0.29                           | 0.07                        |
| placebo             | 0.07                           | 0.60                        |
| 3-IIV HD            |                                | 0.77                        |
| 3-IIV ID            |                                | 0.37                        |
| 3-IIV vir/lip-adj   |                                | 0.34                        |
| 4-IIV vir/lip-adj   |                                | 0.25                        |
| 4-RIV               |                                | 0.94                        |

\* **Placebo:** placebo/no vaccine; **3-IIV:** trivalent inactivated intramuscular; **3-IIV HD:** trivalent inactivated high dose intramuscular; **3-IIV ID:** trivalent inactivated intradermal; **3-IIV MF59/AS03-adj:** trivalent inactivated adjuvanted with MF59/ASO3 intramuscular; **3-IIV vir/lip-adj:** trivalent inactivated adjuvanted with Virosome/liposome intramuscular; **3-RIV:** trivalent recombinant intramuscular; **4-IIV:** quadrivalent inactivated intramuscular; **4-IIV HD:** quadrivalent inactivated high dose intramuscular; **4-IIV ID:** quadrivalent inactivated intradermal; **4-IIV MF59/AS03-adj:** quadrivalent inactivated adjuvanted with MF59/ASO3 intramuscular; **4-IIV vir/lip-adj:** quadrivalent inactivated adjuvanted with virosome/liposome intramuscular; **4-RIV:** quadrivalent recombinant intramuscular; **3-LAIV:** trivalent live attenuated intranasal; **4-LAIV:** quadrivalent live attenuated intranasal.



**Analyses of outcomes and subgroups not performed because of paucity of data**

**The elderly >61 years:** hospitalization, mortality, ILI, any local AE

**Children < 5 years:** hospitalization, mortality, ILI, any local AE, acute otitis media

**Adult immunocompromised/cancer:** hospitalization, mortality, ILI, any local AE

**Adult with pre-existing chronic respiratory disease:** laboratory confirmed influenza, hospitalization, mortality, ILI, any systemic AE, any local AE, exacerbation pre-existing chronic respiratory disease

**Children immunocompromised/cancer:** laboratory confirmed influenza, hospitalization, mortality, ILI, any systemic AE, any local AE

**Children with pre-existing chronic respiratory disease:** hospitalization, mortality, ILI, any systemic AE, any local AE
